# Supplementary material
Source: PubMed Central journal article supplement (PMC3769685)
Supplement: NIHMS479823-supplement-1.pdf [file NIHMS479823-supplement-1.pdf]

# A General, Enantioselective Synthesis of $\beta$ - and $\gamma$ -Fluoroamines

Matthew C. O'Reilly and Craig W. Lindsley

*Departments of Chemistry and Pharmacology, Vanderbilt University, Nashville, TN 37232*

|                                                                                           |           |
|-------------------------------------------------------------------------------------------|-----------|
| General Experimental.....                                                                 | S2        |
| Procedure for fluorination and reduction of aldehydes.....                                | S3        |
| Experimental for fluoroalcohols.....                                                      | S4-6      |
| Procedure for difluorination and reduction of aldehydes.....                              | S7        |
| Experimental for difluoroalcohol.....                                                     | S7        |
| Procedure for preparation of fluoronitriles.....                                          | S8        |
| Experimental for fluoronitriles.....                                                      | S8-11     |
| Procedure for reduction to fluoroamines.....                                              | S12       |
| Experimental for $\gamma$ -fluoroamines.....                                              | S12-15    |
| Procedure for preparation of $\beta$ -fluoroamines and $\beta,\beta$ -difluoroamines..... | S16       |
| Experimental for $\beta$ -fluoroamines and $\beta,\beta$ -difluoroamines .....            | S16-18    |
| Procedure for preparation of $\beta$ -fluoro tetrazole.....                               | S19       |
| Experimental for $\beta$ -fluoro tetrazole.....                                           | S19       |
| Procedure for preparation of $\beta$ -fluoro amide oxime.....                             | S20       |
| Experimental for $\beta$ -fluoro amide oxime.....                                         | S20       |
| Conditions screened for synthesis of $\beta,\beta$ -difluoronitriles.....                 | S21       |
| NMR Spectra ( $^1\text{H}$ , $^{13}\text{C}$ ) and HRMS data.....                         | S22-S105  |
| $^{19}\text{F}$ NMR data indicating ee%.....                                              | S106-S119 |
| Chiral HPLC data indicating ee%.....                                                      | S120-S125 |

## General Experimental

All reagents were purchased from commercial suppliers and were purified as needed according to the procedures of Armarego and Chai.<sup>1</sup> Analytical thin-layer chromatography (TLC) was performed on 250  $\mu\text{m}$  silica plates from Sorbent Technologies. Visualization was accomplished via UV light, and/or the use of ninhydrin, iodine, and potassium permanganate solutions followed by application of heat. Chromatography was performed using Silica Gel 60 (230-400 mesh) from Sorbent Technologies or Silica RediSep Rf flash columns on a CombiFlash Rf automated flash chromatography system. All  $^1\text{H}$  and  $^{13}\text{C}$  NMR spectra were recorded on a Bruker AV-400 (400 MHz) instrument. Chemical shifts are reported in ppm relative to residual solvent peaks as an internal standard set to  $\delta$  7.26 and  $\delta$  77.16 ( $\text{CDCl}_3$ ) or  $\delta$  3.31 and  $\delta$  49.00 (MeOD). Data are reported as follows: chemical shift, multiplicity (s = singlet, d = doublet, t = triplet, q = quartet, p = pentet, sx = sextet, sp = septet, br = broad, dd = doublet of doublets, dq = doublet of quartets, td = triplet of doublets, pd = pentet of doublets, m = multiplet), coupling constant (Hz), integration. Low resolution mass spectra (LCMS) were recorded on an Agilent 1200 LCMS with electrospray ionization. High resolution mass spectra (HRMS) were recorded on a Waters QToF-API-US plus Acuity system with ES as the ion source. Analytical high performance liquid chromatography (HPLC) was performed on an Agilent 1200 analytical LCMS with UV detection at 214 nm and 254 nm along with ELSD detection. Chiral separations were performed on a Thar Investigator II supercritical fluid chromatograph (SFC) utilizing Chiralcel<sup>®</sup> OD, OD-Cl, OJ, and Chiralpak<sup>®</sup> IA columns. Optical rotations were acquired on a Jasco P-2000 polarimeter at 23  $^{\circ}\text{C}$  and 589 nm. The specific rotations were calculated according to the equation  $[\alpha]_{23}^D = 100\alpha/l \times c$  where  $l$  is the path length in decimeters and  $c$  is the concentration in g/100 mL.

### General Procedure A—for fluorination and reduction of aldehydes.

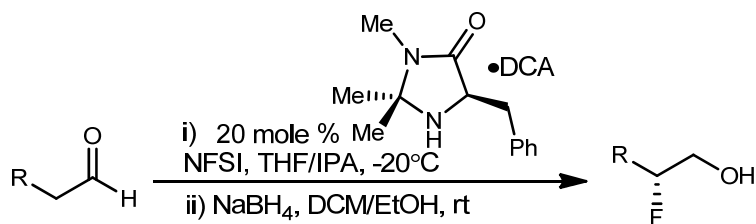

To a round-bottom flask equipped with a magnetic stir bar and charged with (*R*)-5-benzyl-2,2,3-trimethylimidazolidin-4-one dichloro acid salt (139 mg, 0.400 mmol) and *N*-fluorobenzenesulfonimide (3.15 g, 10.0 mmol) was added THF (8.0 mL) and *i*PrOH (1.0 mL). The mixture was stirred at room temperature until all solids were dissolved and was then cooled to -20<sup>o</sup> C. The aldehyde substrate (2 mmol) was then slowly added to the reaction mixture dissolved in THF (1.0 mL) and the mixture was left to stirred for 16 hours. The reaction was then diluted with Et<sub>2</sub>O (20 mL), cooled to -78<sup>o</sup>C, and filtered through a pad of silica gel, eluting with cold Et<sub>2</sub>O (~50 mL). The resultant organic layer was washed with saturated NaHCO<sub>3</sub> (3 x 75 mL), saturated brine (75 mL), dried over MgSO<sub>4</sub>, filtered, and concentrated. The resultant oil was dissolved in DCM (12 mL) and EtOH (8 mL) and NaBH<sub>4</sub> (189 mg, 5.0 mmol) was added at room temperature, all at once. After 30 minutes, the reaction was cooled to 0<sup>o</sup> C and was quenched with saturated NH<sub>4</sub>Cl (~100 mL). The mixture was stirred vigorously and allowed to warm to room temperature and stirred for an additional 30 minutes. 75 mL DCM was added to the suspension when it was extracted with DCM (3 x 75 mL). The combined organic extracts were then washed with NaHCO<sub>3</sub> (3 x 75 mL) and brine (75 mL), dried with MgSO<sub>4</sub>, filtered and concentrated. Purification of the resultant oil was performed by flash column chromatography.

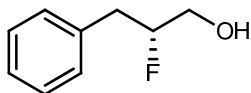

(*R*)-2-fluoro-3-phenylpropan-1-ol (4a)

The product was prepared according general procedure A, purified via flash column chromatography (15% ethyl acetate in hexanes) to afford the product was a clear oil (200 mg, 65% yield).  $^1\text{H}$  NMR (400.1 MHz,  $\text{CDCl}_3$ )  $\delta$  (ppm): 7.36-7.20 (m, 5H); 4.78 (dm,  $J = 49.0$  Hz); 3.84-3.63 (m, 2H); 3.10-2.89 (m, 2H); 1.92 (s, br, 1H).  $^{13}\text{C}$  NMR (100.6 MHz,  $\text{CDCl}_3$ )  $\delta$  (ppm): 136.52 (d,  $J = 5.5$  Hz), 129.33, 128.58, 126.75, 95.70 (d,  $J = 171.9$  Hz), 64.01 (d,  $J = 21.7$  Hz), 37.45 (d,  $J = 21.2$  Hz). Specific rotation  $[\alpha]_D^{23} = +14.9^\circ$  ( $c = 100$ ,  $\text{CHCl}_3$ ). HRMS (TOF, ES+)  $\text{C}_9\text{H}_{11}\text{OFNa}$   $[\text{M}+\text{Na}]^+$  calc. mass 177.0692, found 177.0692.

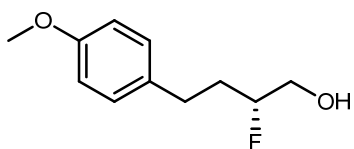

(*R*)-2-fluoro-4-(4-methoxyphenyl)butan-1-ol (4b)

The product was prepared according general procedure A, purified via flash column chromatography (25% ethyl acetate in hexanes) to afford the product was a waxy solid (291 mg, 73% yield).  $^1\text{H}$  NMR (400.1 MHz,  $\text{CDCl}_3$ )  $\delta$  (ppm): 7.13 (d,  $J = 8.6$  Hz, 2H); 6.86 (d,  $J = 8.6$  Hz, 2H); 4.56 (dm,  $J = 49.9$  Hz, 1H); 3.79 (s, 3H); 3.74-3.59 (m, 2H); 2.92 (s, br, 1H); 2.82-2.56 (m, 2H); 2.07-1.92 (m, 1H); 1.89-1.71 (m, 1H).  $^{13}\text{C}$  NMR (100.6 MHz,  $\text{CDCl}_3$ )  $\delta$  (ppm): 157.89, 133.12, 129.33, 113.89, 93.72 (d,  $J = 168.7$  Hz), 64.75 (d,  $J = 21.9$ ), 55.20, 32.84 (d,  $J = 20.7$ ), 30.11 (d,  $J = 4.7$ ). Specific rotation  $[\alpha]_D^{23} = +24.2^\circ$  ( $c = 100$ ,  $\text{CHCl}_3$ ). HRMS (TOF, ES+)  $\text{C}_{11}\text{H}_{15}\text{O}_2\text{FNa}$   $[\text{M}+\text{Na}]^+$  calc. mass 221.0956, found 221.0954.



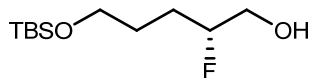

(*R*)-5-((*tert*-butyldimethylsilyloxy)-2-fluoropentan-1-ol (4c)

The product was prepared according general procedure A, purified via flash column chromatography (10% ethyl acetate in hexanes) to afford the product as a clear oil (365 mg, 77% yield).  $^1\text{H}$  NMR (400.1 MHz,  $\text{CDCl}_3$ )  $\delta$  (ppm): 4.52 (dm,  $J = 49.4$  Hz, 1H); 3.70-3.53 (m, 4H); 3.31 (s, br, 1H); 1.69-1.48 (m, 4H); 0.84 (s, 9H); 0.00 (s, 6H).  $^{13}\text{C}$  NMR (100.6 MHz,  $\text{CDCl}_3$ )  $\delta$  (ppm): 94.12 (d,  $J = 169.2$  Hz), 64.28 (d,  $J = 22.2$  Hz), 62.47, 27.97 (d,  $J = 4.2$  Hz), 27.37 (d,  $J = 20.8$  Hz), 25.72, 18.04, -5.60. Specific rotation  $[\alpha]_D^{23} = 5.9^0$  ( $c = 100$ ,  $\text{CHCl}_3$ ). HRMS (TOF, ES+)  $\text{C}_{11}\text{H}_{26}\text{O}_2\text{FSi}$   $[\text{M}+\text{H}]^+$  calc. mass 237.1686, found 237.1688.

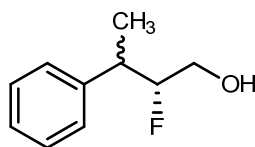

(*2R*)-2-fluoro-3-phenylbutan-1-ol (4d) (4e)

The product was prepared according general procedure A, purified via flash column chromatography (10% ethyl acetate in hexanes) to afford the product as a clear oil (249 mg, 74% yield, 1:1 dr).  $^1\text{H}$  NMR—**Diastereomer A (less polar)** (400.1 MHz,  $\text{CDCl}_3$ )  $\delta$  (ppm): 7.39-7.23 (m, 5H); 4.62 (dm,  $J = 49.1$  Hz, 1H); 3.66-3.47 (m, 2H); 3.16-2.97 (m, 2H); 1.43 (d,  $J = 7.1$  Hz, 3H).  $^1\text{H}$  NMR—**Diastereomer B (more polar)** (400.1 MHz,  $\text{CDCl}_3$ )  $\delta$  (ppm): 7.36-7.20 (m, 5H); 4.69 (dm,  $J = 48.5$  Hz, 1H); 3.81-3.51 (m, 2H); 3.16-3.02 (m, 2H); 1.83 (s, br, 1H); 1.35 (d,  $J = 7.2$  Hz, 3H).  $^{13}\text{C}$  NMR—**Diastereomer A (less polar)** (100.6 MHz,  $\text{CDCl}_3$ )  $\delta$  (ppm): 142.32 (d,  $J = 7.7$  Hz), 128.66, 127.59, 126.89, 98.02 (d,  $J = 175.5$  Hz), 63.02 (d,  $J = 21.6$  Hz), 40.93 (d,  $J = 20.5$  Hz), 17.19 (d,  $J = 4.9$  Hz).  $^{13}\text{C}$  NMR—**Diastereomer B (more polar)** (125 MHz,  $\text{CDCl}_3$ )  $\delta$  (ppm): 141.94, 128.63, 128.08, 127.02, 97.57 (d,  $J = 174.1$  Hz), 63.60 (d,  $J = 22.6$  Hz), 41.13 (d,  $J = 20.1$  Hz), 17.54 (d,  $J = 6.1$  Hz). Specific rotation—**Diastereomer A (less polar)**  $[\alpha]_D^{23} = +12.3^0$  ( $c = 100$ ,  $\text{CHCl}_3$ ). Specific rotation—**Diastereomer B (more polar)**  $[\alpha]_D^{23} = +6.1^0$  ( $c = 100$ ,  $\text{CHCl}_3$ ). HRMS (TOF, ES+)—**Diastereomer A (less polar)**:  $\text{C}_{10}\text{H}_{13}\text{OFNa}$   $[\text{M}+\text{Na}]^+$  calc. mass 191.0848, found 191.0848. HRMS (TOF, ES+)—**Diastereomer B (more polar)**:  $\text{C}_{10}\text{H}_{13}\text{OFNa}$   $[\text{M}+\text{Na}]^+$  calc. mass 191.0848, found 191.0847.

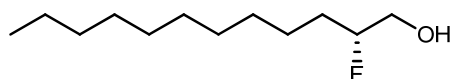

(*R*)-2-fluorododecan-1-ol (4f)

The product was prepared according general procedure A, purified via flash column chromatography (10% ethyl acetate in hexanes) to afford the product was a waxy solid (282 mg, 69% yield).  $^1\text{H}$  NMR (400.1 MHz,  $\text{CDCl}_3$ )  $\delta$  (ppm): 4.524 (dm,  $J = 51.3$  Hz, 1H); 3.77-3.50 (m, 3H); 1.71-1.16 (m, 18H); 0.85 (t,  $J = 6.6$  Hz, 3H).  $^{13}\text{C}$  NMR (100.6 MHz,  $\text{CDCl}_3$ )  $\delta$  (ppm): 94.83 (d,  $J = 168.1$  Hz), 64.96 (d,  $J = 22.1$  Hz), 31.99, 31.08 (d,  $J = 20.6$  Hz), 29.69, 29.65, 29.57, 29.54, 29.42, 25.02 (d,  $J = 4.8$  Hz), 22.76, 14.14. Specific rotation  $[\alpha]_{\text{D}}^{23} = +9.6^\circ$  ( $c = 100$ ,  $\text{CHCl}_3$ ). HRMS (TOF, ES+)  $\text{C}_{12}\text{H}_{25}\text{OFNa}$   $[\text{M}+\text{Na}]^+$  calc. mass 227.1787, found 227.1787.

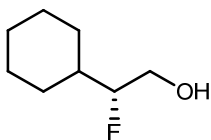

(*R*)-2-cyclohexyl-2-fluoroethanol (4g)

The product was prepared according general procedure A, purified via flash column chromatography (15% ethyl acetate in hexanes) to afford the product was a clear oil (236 mg, 81% yield).  $^1\text{H}$  NMR (400.1 MHz,  $\text{CDCl}_3$ )  $\delta$  (ppm): 4.20 (dm,  $J = 49.2$  Hz, 1H); 3.70-3.57 (m, 2H); 3.21 (s, br, 1H); 1.79 (dm, br,  $J = 12.7$ , 1H); 1.73-1.49 (m, 5H); 1.26-0.93 (m, 5H).  $^{13}\text{C}$  NMR (100.6 MHz,  $\text{CDCl}_3$ )  $\delta$  (ppm): 98.38 (d,  $J = 169.6$  Hz), 62.84 (d,  $J = 22.2$  Hz), 38.79 (d,  $J = 18.8$  Hz), 28.11 (dd,  $J_1 = 51.2$  Hz,  $J_2 = 5.6$  Hz), 26.14, 25.67 (d,  $J = 17.4$  Hz). Specific rotation  $[\alpha]_{\text{D}}^{23} = 2.4^\circ$  ( $c = 100$ ,  $\text{CHCl}_3$ ). HRMS (TOF, ES+)  $\text{C}_8\text{H}_{15}\text{O}_2\text{FNa}$   $[\text{M}+\text{Na}]^+$  calc. mass 169.1005, found 169.005.

## General procedure B—procedure for preparation of difluoro-alcohols

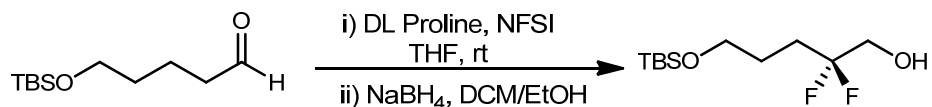

To a round-bottom flask equipped with a magnetic stir bar and charged with DL proline (103.5 mg, 0.9 mmol) and *N*-fluorobenzenesulfonimide (7.568 g, 24.0 mmol) was added THF (27 mL). The mixture was stirred at room temperature until all solids were dissolved and the aldehyde substrate (649.2 mg, 3 mmol) was then slowly added to the reaction mixture dissolved in THF (3.0 mL) and the mixture was stirred for 16 hours. The reaction was then diluted with Et<sub>2</sub>O (20 mL), cooled to -78<sup>o</sup>C, and filtered through a pad of silica gel, eluting with cold Et<sub>2</sub>O (~75 mL). The resultant organic layer was washed with saturated NaHCO<sub>3</sub> (3x), saturated brine (1x), dried over MgSO<sub>4</sub>, filtered, and concentrated. The resultant oil was dissolved in DCM (18 mL) and EtOH (12 mL) and NaBH<sub>4</sub> (283.7 mg, 7.5 mmol) was added at room temperature, all at once. After 30 minutes, the reaction was cooled to 0<sup>o</sup>C and was quenched with saturated NH<sub>4</sub>Cl (~100 mL). The mixture was stirred vigorously and allowed to warm to room temperature and stir for an additional 30 minutes. About 75 mL of DCM was added to the suspension and it was extracted with DCM (3x). The combined organic extracts were then washed with NaHCO<sub>3</sub> (3x) and brine (1x), dried with MgSO<sub>4</sub>, filtered and concentrated. Purification of the resultant oil was performed by flash column chromatography.

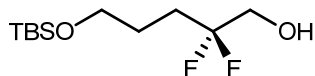

5-((*tert*-butyldimethylsilyl)oxy)-2,2-difluoropentan-1-ol

The product was prepared according general procedure B, purified via flash column chromatography (10% ethyl acetate in hexanes) to afford the product as a clear oil (586 mg, 77% yield). <sup>1</sup>H NMR (400.1 MHz, CDCl<sub>3</sub>) δ (ppm): 3.73-3.60 (m, 4H); 3.49 (s, br, 1H); 2.03-1.85 (m, 2H); 1.75-1.63 (m, 2H); 0.87 (s, 9H); 0.03 (s, 6H). <sup>13</sup>C NMR (100.6 MHz, CDCl<sub>3</sub>) δ (ppm): 123.52 (t, *J* = 241.5 Hz), 63.85 (t, *J* = 31.8 Hz), 62.59, 29.89 (t, *J* = 24.2 Hz), 25.97, 25.14 (t, *J* = 4.3 Hz), 18.39, -5.34. HRMS (TOF, ES<sup>+</sup>) C<sub>11</sub>H<sub>25</sub>O<sub>2</sub>F<sub>2</sub>Si [M+H]<sup>+</sup> calc. mass 255.1592, found 255.1592.

### General Procedure C—procedure for preparation of fluoro-nitriles

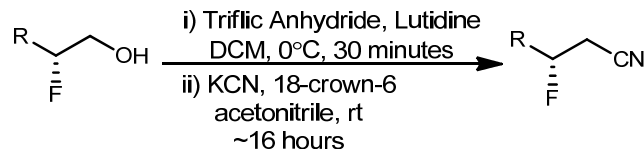

To a flame dried round-bottom flask equipped with a magnetic stir bar and charged with the chiral fluoro-alcohol (1 mmol) and lutidine (535 mg, 5.0 mmol) was added DCM (5 mL), and the mixture was cooled to 0°C with stirring. Trifluoromethanesulfonic anhydride (339 mg, 1.2 mmol) was added to the reaction dropwise, and the mixture was left to stir for 30 minutes. The reaction was then diluted with Et<sub>2</sub>O and water was added to quench the reaction. The mixture was extracted with Et<sub>2</sub>O (3x), dried with MgSO<sub>4</sub>, filtered, and concentrated. The resultant oil was transferred to a round-bottom flask equipped with a magnetic stir bar where it was dissolved in acetonitrile (4 mL), and 18-crown-6 (53 mg, 0.2 mmol) was added and allowed to dissolve with stirring. Potassium cyanide (651 mg, 10 mmol) was added to the reaction at room temperature and the reaction was left with vigorous stirring for the following 16 hours. The reaction was then quenched via the addition of saturated NaHCO<sub>3</sub> and it was extracted with DCM (3x). The organic extract was dried with MgSO<sub>4</sub>, filtered, and concentrated and the resultant crude oil was purified via flash column chromatography.

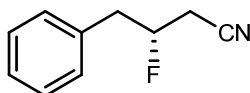

(*R*)-3-fluoro-4-phenylbutanenitrile (9a)

The product was prepared according general procedure C, purified via flash column chromatography (15% ethyl acetate in hexanes, visualized TLC with KMnO<sub>4</sub>) to afford the product was a clear oil (126 mg, 77% yield). <sup>1</sup>H NMR (400.1 MHz, CDCl<sub>3</sub>) δ (ppm): 7.41-7.23 (m, 5H); 4.93 (dp, *J*<sub>1</sub> = 46.7 Hz, *J*<sub>2</sub> = 5.6 Hz, 1H); 3.21-2.97 (m, 2H); 2.75-2.52 (m, 2H). <sup>13</sup>C NMR (100.6 MHz, CDCl<sub>3</sub>) δ (ppm): 134.77 (d, *J* = 5.6 Hz), 129.39, 128.86, 127.37, 116.07 (d, *J* = 5.4 Hz), 88.70 (d, *J* = 180.9 Hz), 40.17 (d, *J* = 20.8), 23.11 (d, *J* = 24.7 Hz). Specific rotation [ $\alpha$ ]<sub>D</sub><sup>23</sup> = -12.3° (*c* = 100, CHCl<sub>3</sub>). HRMS (TOF, ES+) C<sub>10</sub>H<sub>10</sub>NFNa [M+Na]<sup>+</sup> calc. mass 186.0695, found 186.0692.

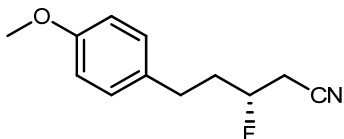

(*R*)-3-fluoro-5-(4-methoxyphenyl)pentanenitrile (9b)

The product was prepared according general procedure C, purified via flash column chromatography (20% ethyl acetate in hexanes, visualized TLC with  $\text{KMnO}_4$ ) to afford the product was a clear oil (190 mg, 92% yield).  $^1\text{H}$  NMR (400.1 MHz,  $\text{CDCl}_3$ )  $\delta$  (ppm): 7.12 (d,  $J = 8.6$  Hz, 2H); 6.86 (d,  $J = 8.6$  Hz, 2H); 4.69 (dsx,  $J_1 = 47.5$  Hz,  $J_2 = 5.3$  Hz, 1H); 3.8 (s, 3H); 2.86-2.57 (m, 4H); 2.21-2.06 (m, 1H); 2.02-1.83 (m, 1H).  $^{13}\text{C}$  NMR (100.6 MHz,  $\text{CDCl}_3$ )  $\delta$  (ppm): 158.25, 132.05, 129.44, 114.97 (d,  $J = 6.1$  Hz), 114.13, 87.49 (d,  $J = 177.9$  Hz), 55.33, 36.16 (d,  $J = 20.3$  Hz), 29.90 (d,  $J = 4.2$  Hz), 24.10 (d,  $J = 25.5$  Hz). Specific rotation  $[\alpha]_D^{23} = +22.8^0$  ( $c = 100$ ,  $\text{CHCl}_3$ ). HRMS (TOF, ES+)  $\text{C}_{12}\text{H}_{14}\text{NFNa}$   $[\text{M}+\text{Na}]^+$  calc. mass 230.0957, found 230.0955.

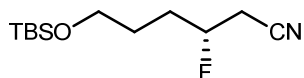

(*R*)-6-((*tert*-butyldimethylsilyl)oxy)-3-fluorohexanenitrile (9c)

The product was prepared according general procedure C, purified via flash column chromatography (15% ethyl acetate in hexanes, visualized TLC with  $\text{KMnO}_4$ ) to afford the product was a clear oil (175 mg, 71% yield).  $^1\text{H}$  NMR (400.1 MHz,  $\text{CDCl}_3$ )  $\delta$  (ppm): 4.76 (dm,  $J = 47.5$  Hz, 1H); 3.69-3.59 (m, 2H); 2.78-2.59 (m, 2H); 1.90-1.53 (m, 4H); 0.87 (s, 9H); 0.03 (s, 6H).  $^{13}\text{C}$  NMR (100.6 MHz,  $\text{CDCl}_3$ )  $\delta$  (ppm): 116.03 (d,  $J = 5.8$  Hz), 88.51 (d,  $J = 177.4$  Hz), 62.24, 31.11 (d,  $J = 20.4$  Hz), 27.85 (d,  $J = 4.2$  Hz), 25.94, 24.09 (d,  $J = 25.3$  Hz), 18.30, -5.35. Specific rotation  $[\alpha]_D^{23} = +4.0^0$  ( $c = 100$ ,  $\text{CHCl}_3$ ). HRMS (TOF, ES+)  $\text{C}_{12}\text{H}_{25}\text{NOFSi}$   $[\text{M}+\text{H}]^+$  calc. mass 246.1689, found 246.1690.

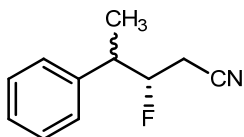

(3S)-3-fluoro-4-phenylpentanenitrile (9d) (9e)

The product (**diastereomer A**) was prepared according to general procedure C, purified via flash column chromatography (10% ethyl acetate in hexanes, visualized TLC with  $\text{KMnO}_4$ ) to afford the product was a clear oil (164 mg, 93% yield). The product (**diastereomer B**) was prepared according to general procedure C, purified via flash column chromatography (10% ethyl acetate in hexanes, visualized TLC with  $\text{KMnO}_4$ ) to afford the product was a clear oil (137 mg, 77% yield).  $^1\text{H}$  NMR—**Diastereomer A (less polar)** (400.1 MHz,  $\text{CDCl}_3$ )  $\delta$  (ppm): 7.39-7.20 (m, 5H); 4.72 (dm,  $J = 46.9$  Hz, 1H); 3.17-3.05 (m, 1H); 2.65-2.33 (m, 2H); 1.45 (dd,  $J_1 = 6.9$  Hz,  $J_2 = 1.3$  Hz, 3H).  $^1\text{H}$  NMR—**Diastereomer B (more polar)** (400.1 MHz,  $\text{CDCl}_3$ )  $\delta$  (ppm): 7.40-7.26 (m, 5H); 4.89 (dm,  $J = 46.9$  Hz, 1H); 3.18-3.03 (m, 1H); 2.65-2.44 (m, 2H); 1.44 (d,  $J = 7.3$  Hz, 3H).  $^{13}\text{C}$  NMR—**Diastereomer A (less polar)** (100.6 MHz,  $\text{CDCl}_3$ )  $\delta$  (ppm): 140.72 (d,  $J = 8.3$  Hz), 129.23, 127.76, 127.59, 116.15 (d,  $J = 3.3$  Hz), 92.21 (d,  $J = 184.5$  Hz), 44.07 (d,  $J = 20.0$  Hz), 22.56 (d,  $J = 23.7$  Hz), 17.32 (d,  $J = 4.1$  Hz).  $^{13}\text{C}$  NMR—**Diastereomer B (more polar)** (100.6 MHz,  $\text{CDCl}_3$ )  $\delta$  (ppm): 139.65 (d,  $J = 1.2$  Hz), 128.78, 128.30, 127.53, 116.23 (d,  $J = 7.7$  Hz), 91.58 (d,  $J = 183.6$  Hz), 43.26 (d,  $J = 19.1$  Hz), 22.04 (d,  $J = 26.9$  Hz), 17.07 (d,  $J = 5.5$  Hz). Specific rotation—**Diastereomer A (less polar)**  $[\alpha]_D^{23} = -41.8^\circ$  ( $c = 100$ ,  $\text{CHCl}_3$ ).

Specific rotation—**Diastereomer B (more polar)**  $[\alpha]_D^{23} = +41.0^\circ$  ( $c = 100$ ,  $\text{CHCl}_3$ ). HRMS—**Diastereomer A (less polar)** (TOF, ES+)  $\text{C}_{11}\text{H}_{13}\text{NF}$   $[\text{M}+\text{H}]^+$  calc. mass 178.1032, found 178.1033. HRMS—**Diastereomer B (more polar)** (TOF, ES+)  $\text{C}_{11}\text{H}_{13}\text{NF}$   $[\text{M}+\text{H}]^+$  calc. mass 178.1032, found 178.1033.

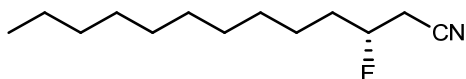

(R)-3-fluorotridecanenitrile (9f)

The product was prepared according to general procedure C, purified via flash column chromatography (10% ethyl acetate in hexanes, visualized TLC with  $\text{KMnO}_4$ ) to afford the product was a waxy solid (175 mg, 82% yield).  $^1\text{H}$  NMR (400.1 MHz,  $\text{CDCl}_3$ )  $\delta$  (ppm): 4.69 (dm,  $J = 47.7$  Hz, 1H); 2.76-2.56 (m, 2H); 1.87-1.55 (m, 2H); 1.51-1.17 (m, 16H), 0.86 (t,  $J = 7.0$  Hz, 3H).  $^{13}\text{C}$  NMR (100.6 MHz,  $\text{CDCl}_3$ )  $\delta$  (ppm): 116.11 (d,  $J = 6.1$  Hz), 88.54 (d,  $J = 177.4$  Hz), 34.27 (d,  $J = 20.1$  Hz), 31.92, 29.58, 29.51, 29.41, 29.33, 29.17, 24.66 (d,  $J = 4.4$  Hz), 24.02 (d,  $J = 25.6$  Hz), 22.70, 14.11. Specific rotation  $[\alpha]_D^{23} = +8.5^\circ$  ( $c = 100$ ,  $\text{CHCl}_3$ ). HRMS (TOF, ES+)  $\text{C}_{13}\text{H}_{24}\text{NFNa}$   $[\text{M}+\text{Na}]^+$  calc. mass 236.1790, found 236.1790.

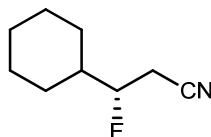

(S)-3-cyclohexyl-3-fluoropropanenitrile (9g)

The product was prepared according to general procedure C, purified via flash column chromatography (10% ethyl acetate in hexanes, visualized TLC with  $\text{KMnO}_4$ ) to afford the product as a clear oil (131 mg, 84% yield).  $^1\text{H}$  NMR (400.1 MHz,  $\text{CDCl}_3$ )  $\delta$  (ppm): 4.44 (dq,  $J_1 = 47.0$  Hz,  $J_2 = 6.2$  Hz, 1H); 2.78-2.60 (m, 2H); 1.95-1.88 (m, 1H); 1.84-1.56 (m, 5H); 1.36-0.99 (m, 5H).  $^{13}\text{C}$  NMR (100.6 MHz,  $\text{CDCl}_3$ )  $\delta$  (ppm): 116.45 (d,  $J = 5.4$  Hz), 92.18 (d,  $J = 179.6$  Hz), 41.31 (d,  $J = 18.7$  Hz), 27.84 (dd,  $J_1 = 78.4$  Hz,  $J_2 = 4.8$  Hz), 26.05, 25.55 (d,  $J = 26.3$  Hz), 21.79 (d,  $J = 25.9$  Hz). Specific rotation  $[\alpha]_D^{23} = -4.2^0$  ( $c = 100$ ,  $\text{CHCl}_3$ ). HRMS (TOF, ES+)  $\text{C}_9\text{H}_{14}\text{NFNa}$   $[\text{M}+\text{Na}]^+$  calc. mass 178.1008, found 178.1007.

### General procedure D—preparation of $\gamma$ -Fluoroamines

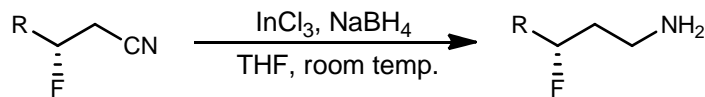

To a flame dried round-bottom flask equipped with a magnetic stir bar and charged with anhydrous  $\text{InCl}_3$  (111 mg, 0.50 mmol) and  $\text{NaBH}_4$  (56.7 mg, 1.50 mmol) was added anhydrous THF (1.2 mL) and the heterogeneous mixture was allowed to stir under argon for 1 hour. The nitrile substrate (0.5 mmol) was then slowly added to the reaction mixture in dissolved in THF (0.5 mL). The reaction was then allowed to stir and was monitored by TLC until completion (approx. 4 hrs). The solution was quenched by the dropwise addition of water (2 mL). This solution was then heated to 75 °C for 30 minutes, then MeOH (2 mL) was added to the mixture and it was again heated to 75 °C for an additional 30 minutes. The solution was then filtered, eluting with MeOH to remove any solid reaction components and the filtrate was concentrated under reduced pressure. The resultant crude material was purified via flash column chromatography (DCM/MeOH).

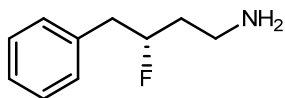

(*R*)-3-fluoro-4-phenylbutan-1-amine (3a)

The product was prepared according to general procedure D, purified via flash column chromatography (10% MeOH in DCM, visualize TLC with ninhydrin) to afford the product was a clear oil (73 mg, 87% yield), which was determined to have an ee of 94% by  $^{19}\text{F}$  NMR of the (*R*) Mosher amide of the final amine ( $^{19}\text{F}$  NMR (300 MHz,  $\text{CDCl}_3$ )  $\delta$  (ppm):  $\delta$  (minor) -180.70,  $\delta$  (major) -180.94, fluorine NMR of racemic and enantioenriched Mosher amides shown below.  $^1\text{H}$  NMR (400.1 MHz,  $\text{CDCl}_3$ )  $\delta$  (ppm): 7.33-7.18 (m, 5H); 4.81 (dm,  $J = 49.0$  Hz, 1H); 3.05-2.78 (m, 4H); 1.88-1.60 (m, 2H); 1.49 (s, br, 2H).  $^{13}\text{C}$  NMR (100.6 MHz,  $\text{CDCl}_3$ )  $\delta$  (ppm): 137.10 (d,  $J = 5.0$  Hz), 129.42, 128.49, 126.65, 92.97 (d,  $J = 170.6$  Hz), 41.86 (d,  $J = 21.1$  Hz), 38.40, 38.29 (d,  $J = 14.5$  Hz). Specific rotation  $[\alpha]_D^{23} = -2.1^0$  ( $c = 100$ ,  $\text{CHCl}_3$ ). HRMS (TOF, ES+)  $\text{C}_{10}\text{H}_{15}\text{NF}$   $[\text{M}+\text{H}]^+$  calc. mass 168.1189, found 168.1190.



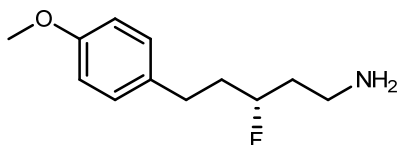

(*R*)-3-fluoro-5-(4-methoxyphenyl)pentan-1-amine (3b)

The product was prepared according to general procedure D, purified via flash column chromatography (10% MeOH in DCM, visualize TLC with ninhydrin) to afford the product was a clear oil (89 mg, 84% yield) which was determined to have an ee of 87% by  $^{19}\text{F}$  NMR of the (*R*) Mosher amide of the final amine ( $^{19}\text{F}$  NMR (300 MHz,  $\text{CDCl}_3$ )  $\delta$  (ppm):  $\delta$  (minor) -184.15,  $\delta$  (major) -184.32, fluorine NMR of racemic and enantioenriched Mosher amides shown below.  $^1\text{H}$  NMR (400.1 MHz, MeOD)  $\delta$  (ppm): 7.10 (d,  $J = 8.5$  Hz, 2H); 6.82 (d,  $J = 8.7$  Hz, 2H); 4.55 (dsp,  $J_1 = 49.8$  Hz,  $J_2 = 4.0$  Hz, 1H); 3.75 (s, 3H); 2.83-2.56 (m, 4H); 1.98-1.60 (m, 4H).  $^{13}\text{C}$  NMR (100.6 MHz, MeOD)  $\delta$  (ppm): 159.42, 134.76, 130.33, 114.87, 93.01 (d,  $J = 166.7$  Hz), 55.63, 39.12 (d,  $J = 20.4$  Hz), 38.81 (d,  $J = 4.1$  Hz), 38.61 (d,  $J = 20.6$  Hz), 31.40 (d,  $J = 4.6$  Hz). Specific rotation  $[\alpha]_D^{23} = +11.6^\circ$  ( $c = 100$ ,  $\text{CHCl}_3$ ). HRMS (TOF, ES+)  $\text{C}_{12}\text{H}_{19}\text{NOF}$   $[\text{M}+\text{H}]^+$  calc. mass 212.1451, found 212.1447.

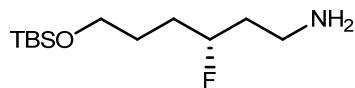

(*R*)-6-((*tert*-butyldimethylsilyloxy)-3-fluorohexan-1-amine (3c)

The product was prepared according general procedure D, purified via flash column chromatography (10% MeOH in DCM, visualize TLC with ninhydrin) to afford the product was a clear oil (107 mg, 86% yield) which was determined to have an ee of 92% by  $^{19}\text{F}$  NMR of the (*R*) Mosher amide of the final amine ( $^{19}\text{F}$  NMR (300 MHz,  $\text{CDCl}_3$ )  $\delta$  (ppm):  $\delta$  (minor) -184.15,  $\delta$  (major) -184.32, fluorine NMR of racemic and enantioenriched Mosher amides shown below.  $^1\text{H}$  NMR (400.1 MHz, MeOD)  $\delta$  (ppm): 4.60 (dm,  $J = 50.2$  Hz, 1H); 3.71-3.55 (m, 2H); 2.84-2.70 (m, 2H); 1.87-1.53 (m, 6H); 0.91 (s, 9H); 0.07 (s, 6H).  $^{13}\text{C}$  NMR (100.6 MHz, MeOD)  $\delta$  (ppm): 93.73 (d,  $J = 166.4$  Hz), 63.88, 39.27 (d,  $J = 20.5$  Hz), 38.95 (d,  $J = 4.4$  Hz), 32.97 (d,  $J = 21.1$  Hz), 29.49 (d,  $J = 4.1$  Hz), 26.41, 19.13, -5.18. Specific rotation  $[\alpha]_D^{23} = -4.2^\circ$  ( $c = 100$ ,  $\text{CHCl}_3$ ). HRMS (TOF, ES+)  $\text{C}_{12}\text{H}_{29}\text{NOFSi}$   $[\text{M}+\text{H}]^+$  calc. mass 250.2002, found 250.2001.

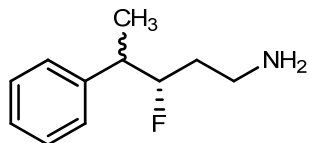

(3S)-3-fluoro-4-phenylpentan-1-amine (3d) (3e)

The product (**diastereomer A**) was prepared according to general procedure D, purified via flash column chromatography (10% MeOH in DCM, visualize TLC with ninhydrin) to afford the product was a clear oil (75 mg, 83% yield) which was determined to have an ee of 96% by  $^{19}\text{F}$  NMR of the (*R*) mosher amide of the final amine ( $^{19}\text{F}$  NMR (300 MHz,  $\text{CDCl}_3$ )  $\delta$  (ppm):  $\delta$  (major) -186.34,  $\delta$  (minor) -186.39, fluorine NMR of racemic and enantioenriched mosher amides shown below. The product (**diastereomer B**) was prepared according to general procedure D, purified via flash column chromatography (10% MeOH in DCM, stain visualize with ninhydrin) to afford the product was a clear oil (82 mg, 90% yield) which was determined to have an ee of 96% by  $^{19}\text{F}$  NMR of the (*R*) mosher amide of the final amine ( $^{19}\text{F}$  NMR (300 MHz,  $\text{CDCl}_3$ )  $\delta$  (ppm):  $\delta$  (minor) -187.23,  $\delta$  (major) -187.43, fluorine NMR of racemic and enantioenriched mosher amides shown below.  $^1\text{H}$  NMR—**Diastereomer A (less polar)** (400.1 MHz, MeOD)  $\delta$  (ppm): 7.33-7.26 (m, 2H); 7.25-7.18 (m, 3H); 4.65 (dm,  $J = 49.0$  Hz); 2.97-2.83 (m, 1H); 2.79-2.61 (m, 2H); 1.81-1.44 (m, 2H); 1.35 (d,  $J = 7.0$  Hz).  $^1\text{H}$  NMR—**Diastereomer B (more polar)** (400.1 MHz, MeOD)  $\delta$  (ppm): 7.32-7.17 (m, 5H); 4.71 (dm,  $J = 48.9$  Hz, 1H); 2.99-2.85 (m, 1H); 2.83-2.69 (m, 2H); 1.78-1.58 (m, 2H); 1.33 (d,  $J = 7.2$  Hz, 3H).  $^{13}\text{C}$  NMR—**Diastereomer A (less polar)** (100.6 MHz, MeOD)  $\delta$  (ppm): 144.49 (d,  $J = 6.8$  Hz), 129.63, 128.89, 127.80, 97.34 (d,  $J = 173.3$  Hz), 46.19 (d,  $J = 20.5$  Hz), 39.10 (d,  $J = 3.5$  Hz), 37.32 (d,  $J = 20.7$  Hz), 17.67 (d,  $J = 5.4$  Hz).  $^{13}\text{C}$  NMR—**Diastereomer B (more polar)** (100.6 MHz, MeOD)  $\delta$  (ppm): 143.62 (d, 2.3 Hz), 129.37, 129.28, 127.62, 96.81 (d,  $J = 172.8$  Hz), 45.61 (d,  $J = 19.8$  Hz), 38.98 (d,  $J = 4.0$  Hz), 36.46 (d,  $J = 20.8$  Hz), 17.96 (d,  $J = 5.9$  Hz). Specific rotation—**Diastereomer A (less polar)**  $[\alpha]_D^{23} = -9.1^0$  ( $c = 100$ ,  $\text{CHCl}_3$ ). Specific rotation—**Diastereomer B (more polar)**  $[\alpha]_D^{23} = -14.0^0$  ( $c = 100$ ,  $\text{CHCl}_3$ ). HRMS—**Diastereomer A (less polar)** (TOF, ES+)  $\text{C}_{11}\text{H}_{17}\text{NF}$   $[\text{M}+\text{H}]^+$  calc. mass 182.1345, found 182.1343. HRMS—**Diastereomer B (more polar)** (TOF, ES+)  $\text{C}_{11}\text{H}_{17}\text{NF}$   $[\text{M}+\text{H}]^+$  calc. mass 182.1345, found 182.1346.

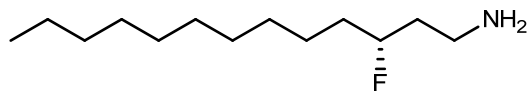

(*R*)-3-fluorotridecan-1-amine (3f)

The product was prepared according to general procedure D, purified via flash column chromatography (10% MeOH in DCM, visualize TLC with ninhydrin) to afford the product was a waxy solid (97 mg, 89% yield) which was determined to have an ee of 95% by  $^{19}\text{F}$  NMR of the (*R*) mosher amide of the final amine ( $^{19}\text{F}$  NMR (300 MHz,  $\text{CDCl}_3$ )  $\delta$  (ppm):  $\delta$  (minor) -181.97,  $\delta$  (major) -182.19, fluorine NMR of racemic and enantioenriched mosher amides shown below.  $^1\text{H}$  NMR (400.1 MHz, MeOD)  $\delta$  (ppm): 4.56 (dm,  $J = 49.7$  Hz, 1H); 2.83-2.70 (m, 2H); 1.81-1.42 (m, 5H); 1.41-1.24 (m, 15H); 0.90 (t,  $J = 7.1$  Hz, 3H).  $^{13}\text{C}$  NMR (100.6 MHz, MeOD)  $\delta$  (ppm): 93.81 (d,  $J = 166.3$  Hz), 39.15 (d,  $J = 20.7$  Hz), 38.95 (d,  $J = 4.4$  Hz), 36.53 (d,  $J = 20.7$  Hz), 33.08, 30.75, 30.73, 30.70, 30.62, 30.49, 26.22 (d,  $J = 4.6$  Hz), 23.75, 14.47. Specific rotation  $[\alpha]_D^{23} = -4.6^0$  ( $c = 100$ ,  $\text{CHCl}_3$ ). HRMS (TOF, ES+)  $\text{C}_{13}\text{H}_{29}\text{NF}$   $[\text{M}+\text{H}]^+$  calc. mass 218.2284, found 218.2283.

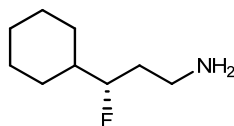

(*S*)-3-cyclohexyl-3-fluoropropan-1-amine (3g)

The product was prepared according to general procedure D, purified via flash column chromatography (10% MeOH in DCM, visualize TLC with ninhydrin) to afford the product was a clear oil (58 mg, 73% yield), which was determined to have an ee of 96% by  $^{19}\text{F}$  NMR of the (*R*) mosher amide of the final amine ( $^{19}\text{F}$  NMR (300 MHz,  $\text{CDCl}_3$ )  $\delta$  (ppm):  $\delta$  (minor) -187.84,  $\delta$  (major) -187.94, fluorine NMR of racemic and enantioenriched mosher amides shown below.  $^1\text{H}$  NMR (400.1 MHz, MeOD)  $\delta$  (ppm): 4.30 (dm,  $J = 49.2$  Hz, 1H); 2.89-2.72 (m, 2H); 1.92-1.84 (m, 1H); 1.83-1.62 (m, 5H); 1.57-1.42 (m, 1H); 1.36-1.00 (m, 5H).  $^{13}\text{C}$  NMR (100.6 MHz, MeOD)  $\delta$  (ppm): 97.39 (d,  $J = 168.6$  Hz), 43.61 (d,  $J = 19.3$  Hz), 39.1 (d,  $J = 3.8$  Hz), 35.74 (d,  $J = 21.3$  Hz), 29.20 (dd,  $J_1 = 97$  Hz,  $J_2 = 5.7$  Hz), 27.30 (d,  $J = 35.7$  Hz), 29.94. Specific rotation  $[\alpha]_D^{23} = -19.0^0$  ( $c = 100$ ,  $\text{CHCl}_3$ ). HRMS (TOF, ES+)  $\text{C}_9\text{H}_{19}\text{NF}$   $[\text{M}+\text{H}]^+$  calc. mass 160.1502, found 160.1502.

## General Procedure E—preparation of $\beta$ -fluoroamines or $\beta,\beta$ -difluoroamines

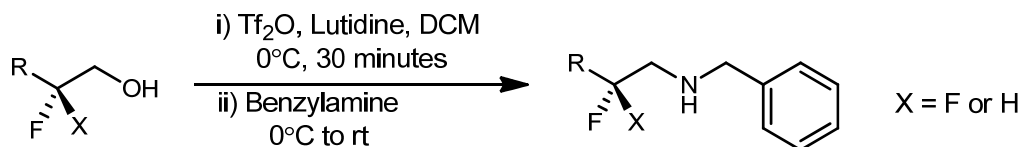

Triflic anhydride (339 mg, 1.2 mmol) was added dropwise to a flame dried round bottom flask equipped with a magnetic stir bar and charged with the chiral fluoro alcohol or difluoro alcohol (1 mmol) and lutidine (535 mg, 5 mmol) in DCM (5 mL) under argon at  $0^\circ\text{C}$ . The reaction mixture was allowed to stir for 30 minutes before it was removed from the stir plate while still being kept at  $0^\circ\text{C}$ . A separate round bottom flask equipped with a magnetic stir bar and charged with benzylamine (1.07 g, 10.0 mmol) in 2 mL of DCM was stirred at  $0^\circ\text{C}$ . The solution of the triflate was then added slowly to this new flask taking care to keep everything at  $0^\circ\text{C}$ , and after addition was complete, the flask was washed with an additional 2 mL of DCM and that was then added to the reaction to bring the total volume of DCM to 9 mL. The reaction was then allowed to warm to room temperature over the next hour and left to stir overnight (14-16 hours). The  $\beta,\beta$ -difluoroamines were allowed to react for 24 hours. A solution of saturated  $\text{NaHCO}_3$  was added to quench the reaction and it was transferred to a separatory funnel. There it was extracted 3X with DCM and the combined organic extracts were dried with  $\text{MgSO}_4$ , filtered, and concentrated under reduced pressure. The crude oil was then purified via flash column chromatography (hexanes/ethyl acetate).

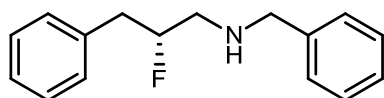

(*R*)-*N*-benzyl-2-fluoro-3-phenylpropan-1-amine (2a)

The product was prepared according to general procedure E, purified via flash column chromatography (20-50% ethyl acetate in hexanes, visualize TLC with ninhydrin) to afford the product was a clear oil (204 mg, 84% yield), which was determined to have an ee of 94% by chiral HPLC analysis (Chiralpak IA,  $t_R$  (major) = 4.87 minutes,  $t_R$  (minor) = 5.74 minutes, traces shown below).  $^1\text{H}$  NMR (400.1 MHz,  $\text{CDCl}_3$ )  $\delta$  (ppm): 7.42-7.23 (m, 10H); 4.91 (dm,  $J$  = 48.9 Hz, 1H); 3.91-3.81 (m, 2H); 3.13-2.78 (m, 4H); 1.86 (s, br, 1H).  $^{13}\text{C}$  NMR (100.6 MHz,  $\text{CDCl}_3$ )  $\delta$  (ppm): 140.09, 136.96 (d,  $J$  = 5.5 Hz), 129.40, 128.55, 128.50, 128.18, 127.10, 126.70, 94.07 (d,  $J$  = 171.2 Hz), 53.83, 52.38 (d,  $J$  = 21.0 Hz), 39.45 (d,  $J$  = 21.2 Hz). Specific rotation  $[\alpha]_D^{23} = -2.3^\circ$  ( $c$  = 100,  $\text{CHCl}_3$ ). HRMS (TOF, ES+)  $\text{C}_{16}\text{H}_{19}\text{NF}$   $[\text{M}+\text{H}]^+$  calc. mass 244.1502, found 244.1503.

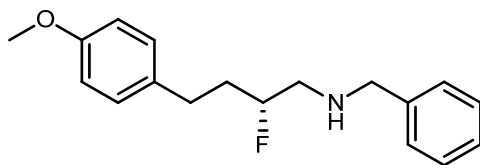

(*R*)-*N*-benzyl-2-fluoro-4-(4-methoxyphenyl)butan-1-amine (2b)

The product was prepared according to general procedure E, purified via flash column chromatography (20-50% ethyl acetate in hexanes, visualize TLC with ninhydrin) to afford the product was a clear oil (277 mg, 96% yield), which was determined to have an ee of 90% by chiral HPLC analysis (Chiralpak IB,  $t_R$  (major) = 6.56 minutes,  $t_R$  (minor) = 5.93 minutes, traces shown below).  $^1\text{H}$  NMR (400.1 MHz,  $\text{CDCl}_3$ )  $\delta$  (ppm): 7.41-7.25 (m, 5H); 7.14 (d,  $J$  = 8.6 Hz, 2H); 6.87 (d,  $J$  = 8.6 Hz, 2H); 4.68 (dm,  $J$  = 50.0 Hz, 1H); 3.85 (s, 2H); 3.81 (s, 3H); 2.94-2.63 (m, 4H); 2.10-1.95 (m, 1H); 1.93-1.80 (m, 1H); 1.78 (s, br, 1H).  $^{13}\text{C}$  NMR (100.6 MHz,  $\text{CDCl}_3$ )  $\delta$  (ppm): 157.97, 140.10, 133.30, 129.40, 128.47, 128.13, 127.07, 113.92, 93.05 (d,  $J$  = 167.8 Hz), 55.26, 53.83, 53.07 (d,  $J$  = 20.9 Hz), 35.00 (d,  $J$  = 20.6 Hz), 30.36 (d,  $J$  = 4.6 Hz). Specific rotation  $[\alpha]_D^{23} = +11.8^\circ$  ( $c$  = 100,  $\text{CHCl}_3$ ). HRMS (TOF, ES+)  $\text{C}_{18}\text{H}_{23}\text{NOF}$   $[\text{M}+\text{H}]^+$  calc. mass 288.1764, found 288.1762.

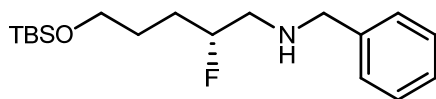

(*R*)-*N*-benzyl-5-((*tert*-butyldimethylsilyloxy)-2-fluoropentan-1-amine (2c)

The product was prepared according to general procedure E, purified via flash column chromatography (20-50% ethyl acetate in hexanes, visualize TLC with ninhydrin) to afford the product was a clear oil (314 mg, 96% yield), which was determined to have an ee of 94% by chiral HPLC analysis (Chiralpak ID,  $t_R$  (major) = 9.74 minutes,  $t_R$  (minor) = 10.65 minutes, traces shown below).  $^1\text{H}$  NMR (400.1 MHz,  $\text{CDCl}_3$ )  $\delta$  (ppm): 7.39-7.22 (m, 5H); 4.68 (dm,  $J$  = 50.0 Hz, 1H); 3.87-3.79 (m, 2H); 3.69-3.58 (m, 2H); 2.90-2.68 (m, 2H); 1.81-1.54 (m, 5H); 0.90 (s, 9H); 0.06 (s, 6H).  $^{13}\text{C}$  NMR (100.6 MHz,  $\text{CDCl}_3$ )  $\delta$  (ppm): 140.18, 128.54, 128.19, 127.12, 93.89 (d,  $J$  = 167.8 Hz), 62.76, 53.90, 53.24 (d,  $J$  = 20.9 Hz), 29.62 (d,  $J$  = 20.7 Hz), 28.43 (d,  $J$  = 4.3 Hz), 26.06, 18.43, -5.20. Specific rotation  $[\alpha]_D^{23} = +0.6^\circ$  ( $c$  = 100,  $\text{CHCl}_3$ ). HRMS (TOF, ES+)  $\text{C}_{18}\text{H}_{33}\text{NOFSi}$   $[\text{M}+\text{H}]^+$  calc. mass 326.2315, found 326.2318.

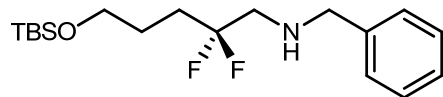

*N*-benzyl-5-((*tert*-butyldimethylsilyl)oxy)-2,2-difluoropentan-1-amine (5)

The product was prepared according to general procedure E, purified via flash column chromatography (20-50% ethyl acetate in hexanes, visualize TLC with ninhydrin) to afford the product as a clear oil (277 mg, 81% yield).  $^1\text{H}$  NMR (400.1 MHz,  $\text{CDCl}_3$ )  $\delta$  (ppm): 7.39-7.24 (m, 5H); 3.88 (s, 2H); 3.67 (t,  $J = 6.3$  Hz, 2H); 2.95 (t,  $J = 14.1$  Hz, 2H); 2.10-1.95 (m, 2H); 1.75-1.66 (m, 2H); 1.62 (s, 1H); 0.93 (s, 9H); 0.09 (s, 6H).  $^{13}\text{C}$  NMR (100.6 MHz,  $\text{CDCl}_3$ )  $\delta$  (ppm): 139.96, 128.55, 128.17, 127.23, 127.87 (t,  $J = 240.9$  Hz), 62.52, 53.78, 52.70 (t,  $J = 28.4$ ), 31.27 (t,  $J = 24.6$  Hz), 26.04, 25.57 (t,  $J = 4.3$  Hz), 18.41, -5.23. HRMS (TOF, ES+)  $\text{C}_{18}\text{H}_{32}\text{NOF}_2\text{Si}$   $[\text{M}+\text{H}]^+$  calc. mass 344.2221, found 344.2219.

### Procedure F—preparation of $\beta$ -fluoro tetrazoles

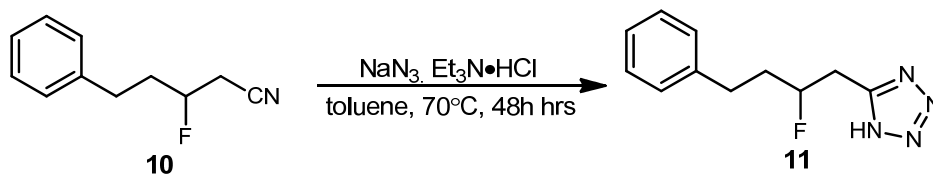

The mixture of fluoro-nitrile **10** (354 mg, 2 mmol), sodium azide (244 mg, 6 mmol), and triethylamine hydrochloride (517 mg, 6 mmol) in toluene (6 mL), in a round-bottomed flask equipped with a magnetic stir bar, was stirred and heated to  $70^\circ\text{C}$  for 48 hours. After cooling to room temperature, the product was extracted with water (2 X 6 mL), and the aqueous layer was acidified with 1 mL of concentrated hydrochloric acid (38%). If a white solid did not immediately crash out of solution upon acidification, air was blown on the water for to partially concentrate the water, and the  $\beta$ -fluoro-tetrazole then crashed out of solution as a white solid, which was collected using a Buchner funnel and was dried under reduced pressure. The solid was purified via reverse phase chromatography.

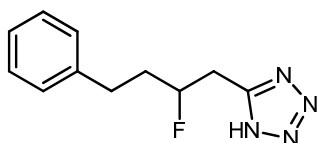

5-(2-fluoro-4-phenylbutyl)-1H-tetrazole (**11**)

The product was prepared according to general procedure F, and was purified via reverse phase chromatography (10-90% MeCN in water (0.1% TFA), to afford the product as a white solid (339 mg, 77% yield).  $^1\text{H}$  NMR (400.1 MHz, MeOD)  $\delta$  (ppm): 7.28-7.22 (m, 2H); 7.21-7.12 (m, 3H); 4.84 (dm,  $J = 48.8$  Hz, 1H); 3.40-3.21 (m, 2H); 2.86-2.66 (m, 2H); 2.04-1.86 (m, 2H).  $^{13}\text{C}$  NMR (100.6 MHz, MeOD)  $\delta$  (ppm): 154.38, 142.11, 129.50, 129.41, 127.11, 91.62 (d,  $J = 172.0$  Hz), 37.43 (d,  $J = 20.5$  Hz), 31.92 (d,  $J = 4.3$  Hz), 30.2 (d,  $J = 22.3$  Hz). HRMS (TOF, ES+)  $\text{C}_{11}\text{H}_{14}\text{N}_4\text{F}$   $[\text{M}+\text{H}]^+$  calc. mass 221.1202, found 221.1201.

### Procedure G—preparation of $\beta$ -fluoro amide oxime

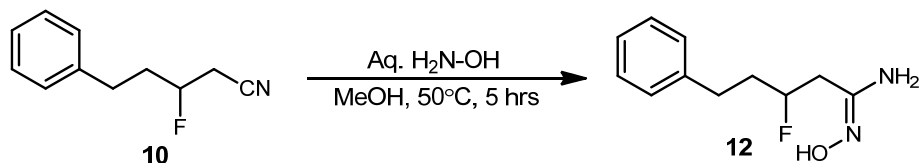

A mixture of fluoro-nitrile **10** (177 mg, 1 mmol) and aqueous hydroxylamine (66 mg, 2 mmol, from 50% aqueous solution) in methanol (1 mL) was added to a round-bottomed flask equipped with a magnetic stir bar and was heated to 50°C for 5 hours with stirring. The reaction was then concentrated under reduced pressure to evaporate all solvents and reagents. Crude product was pure enough for use in future reactions, but was purified via reverse phase chromatography to obtain spectroscopically pure material.

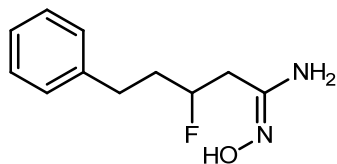

(*E*)-3-fluoro-*N'*-hydroxy-5-phenylpentanimidamide (**12**)

The product was prepared according to general procedure G, and was purified via reverse phase chromatography (10-90% MeCN in water (0.1% TFA), to afford the product as a white solid (191 mg, 91% yield). <sup>1</sup>H NMR (400.1 MHz, MeOD)  $\delta$  (ppm): 7.31-7.24 (m, 2H); 7.23-7.15 (m, 3H); 4.79 (dm,  $J = 49.0$  Hz, 1H); 2.89-2.63 (m, 4H); 2.09-1.85 (m, 2H). <sup>13</sup>C NMR (100.6 MHz, MeOD)  $\delta$  (ppm): 161.66, 141.94, 129.57, 129.46, 127.23, 90.89 (d,  $J = 174.6$ ), 37.66 (d,  $J = 20.1$  Hz), 35.9 (d,  $J = 22.3$  Hz), = 22.3 Hz), 31.82 (d,  $J = 3.9$  Hz). HRMS (TOF, ES<sup>+</sup>) C<sub>11</sub>H<sub>16</sub>N<sub>2</sub>OF [M+H]<sup>+</sup> calc. mass 211.1247, found 211.1245.



## Attempted Reaction Conditions for the synthesis of $\beta,\beta$ -difluoronitriles

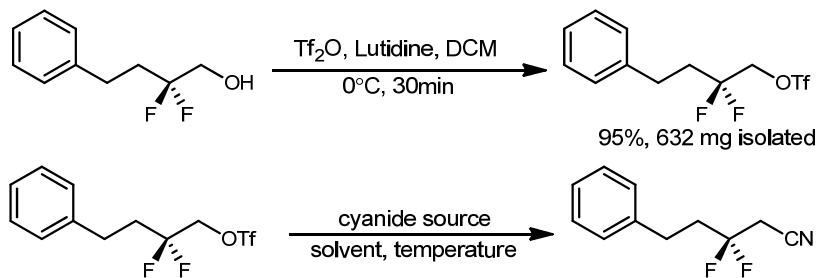

| Solvent           | Cyanide    | Additive               | Temperature            | Result                                                                    |
|-------------------|------------|------------------------|------------------------|---------------------------------------------------------------------------|
| MeCN              | KCN        | 18-C-6                 | room temp (24 hrs)     | decomposition                                                             |
| MeCN              | KCN        | water cosolvent        | MW 90 (30min)          | decomposition                                                             |
| MeCN              | KCN        | 18-C-6                 | MW 120 (10min)         | decomposition                                                             |
| THF               | KCN        | water cosolvent        | room temp (16 hrs)     | no conversion                                                             |
| THF               | KCN        | water cosolvent        | 50°C (16 hrs)          | slow decomposition                                                        |
| <b>THF</b>        | <b>KCN</b> | <b>water cosolvent</b> | <b>MW 150 (45 min)</b> | <b>10% isolated yield (8mg)</b> → <b>Not Reproducible on Larger Scale</b> |
| THF               | KCN        | water cosolvent        | room temp (16 hrs)     | no conversion                                                             |
| THF               | KCN        | MeOH cosolvent         | MW 130 (30min)         | slow decomposition                                                        |
| THF               | KCN        | 18-C-6                 | MW 160 (45min)         | decomposition                                                             |
| <sup>t</sup> BuOH | KCN        | none                   | MW 120 (10min)         | little/no conversion                                                      |
| <sup>t</sup> BuOH | KCN        | none                   | MW 150 (45min)         | some s.m. left, decomp.                                                   |
| DMSO              | KCN        | none                   | 70°C (10min)           | decomposition                                                             |
| DMSO              | KCN        | none                   | room temp (14 hrs)     | decomposition                                                             |
| DCM               | TBA • CN   | none                   | room temp (2 hrs)      | decomposition                                                             |
| MeCN              | TBA • CN   | none                   | room temp (15min)      | decomposition                                                             |

} no fluorine in products

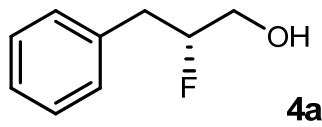

(*R*)-2-fluoro-3-phenylpropan-1-ol  
Solvent: CDCl<sub>3</sub>  
400.13 MHz

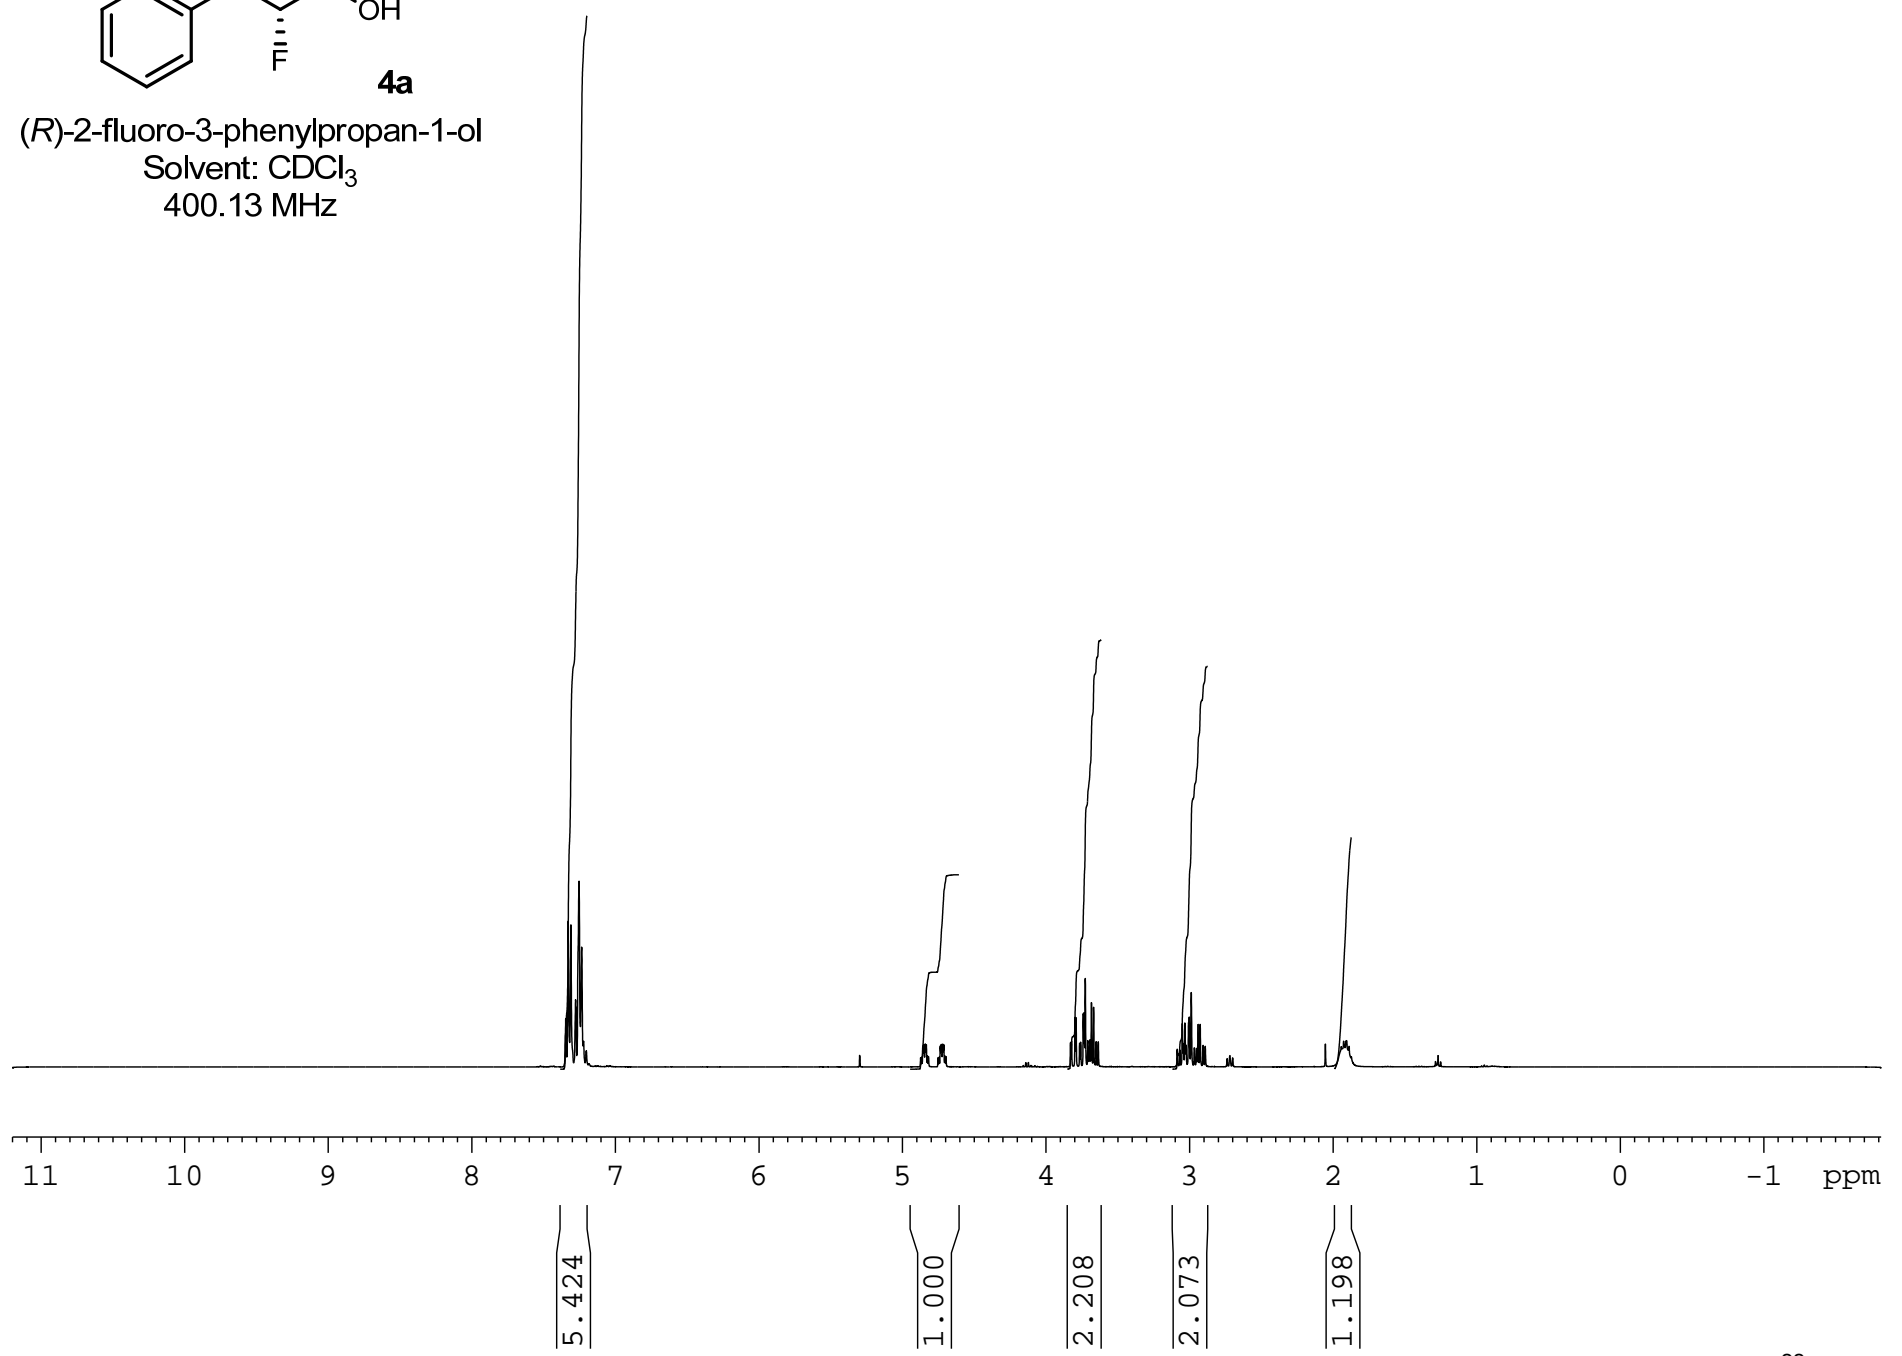

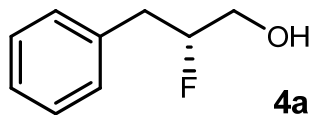

**4a**

(*R*)-2-fluoro-3-phenylpropan-1-ol  
Solvent: CDCl<sub>3</sub>  
100.6 MHz

136.548  
136.493  
129.333  
128.576  
126.751

95.548  
93.839

64.120  
63.905

37.551  
37.340

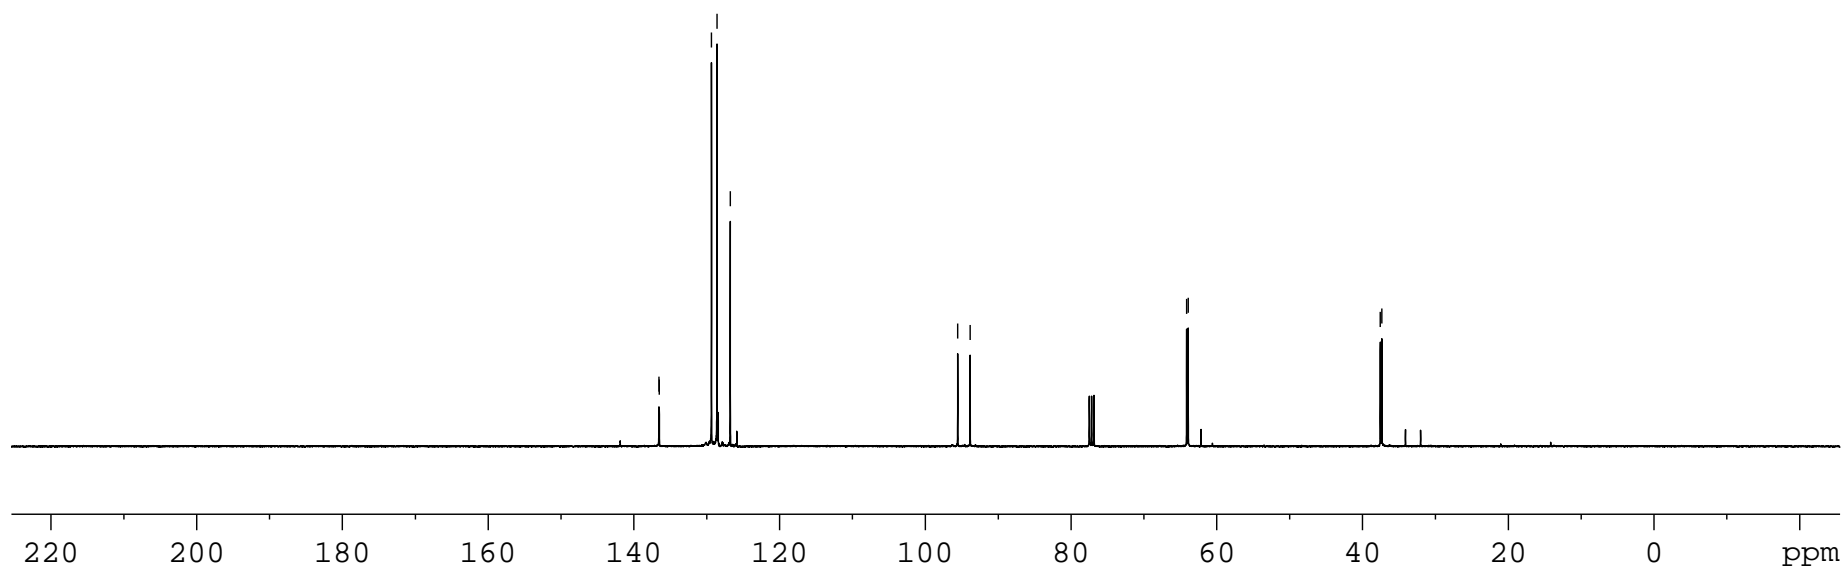

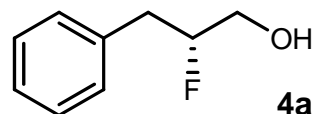

## Elemental Composition Report

Page 1

### Single Mass Analysis

Tolerance = 5.0 PPM / DBE: min = -0.5, max = 25.0

Element prediction: Off

Number of isotope peaks used for i-FIT = 2

Monoisotopic Mass, Even Electron Ions

8 formula(e) evaluated with 1 results within limits (up to 50 best isotopic matches for each mass)

Elements Used:

C: 8-500 H: 10-1000 O: 1-200 F: 1-1 Na: 1-1

**MCO-IV-151**

S/N: UH193

MCO-IV-151\_120712\_001 45 (0.842) AM (Cen,4, 80.00, Ar,8000.0,556.28,0.70); Sm (SG, 2x1.00); Cm (40:50)

07-Dec-2012  
13:11:55  
TOF MS ES+  
3.35e+003

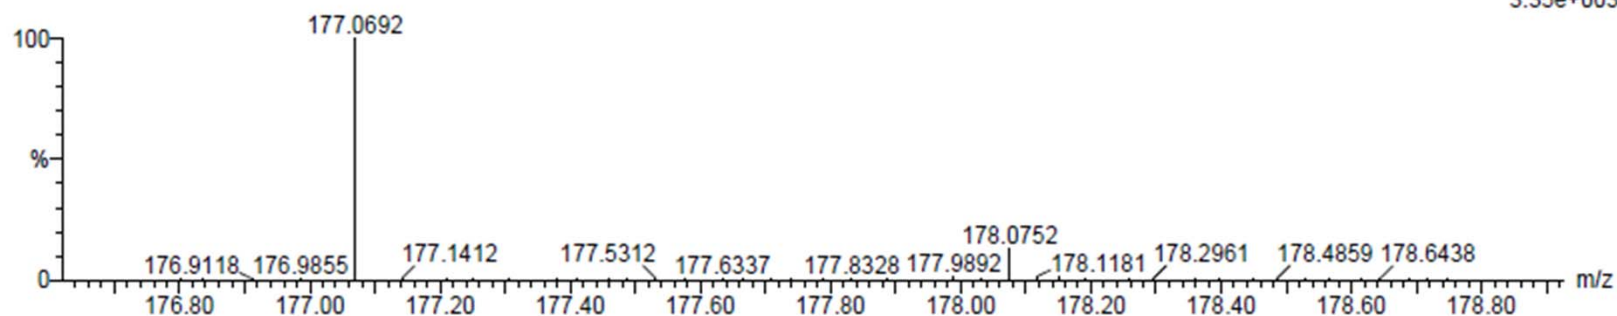

Minimum: -0.5  
Maximum: 5.0 5.0 25.0

| Mass            | Calc. Mass      | mDa        | PPM        | DBE        | i-FIT      | Formula              |
|-----------------|-----------------|------------|------------|------------|------------|----------------------|
| <b>177.0692</b> | <b>177.0692</b> | <b>0.0</b> | <b>0.0</b> | <b>3.5</b> | <b>7.5</b> | <b>C9 H11 O F Na</b> |

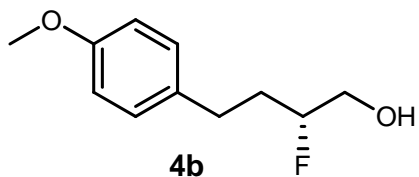

(*R*)-2-fluoro-4-(4-methoxyphenyl)butan-1-ol

Solvent: CDCl<sub>3</sub>

400.13 MHz

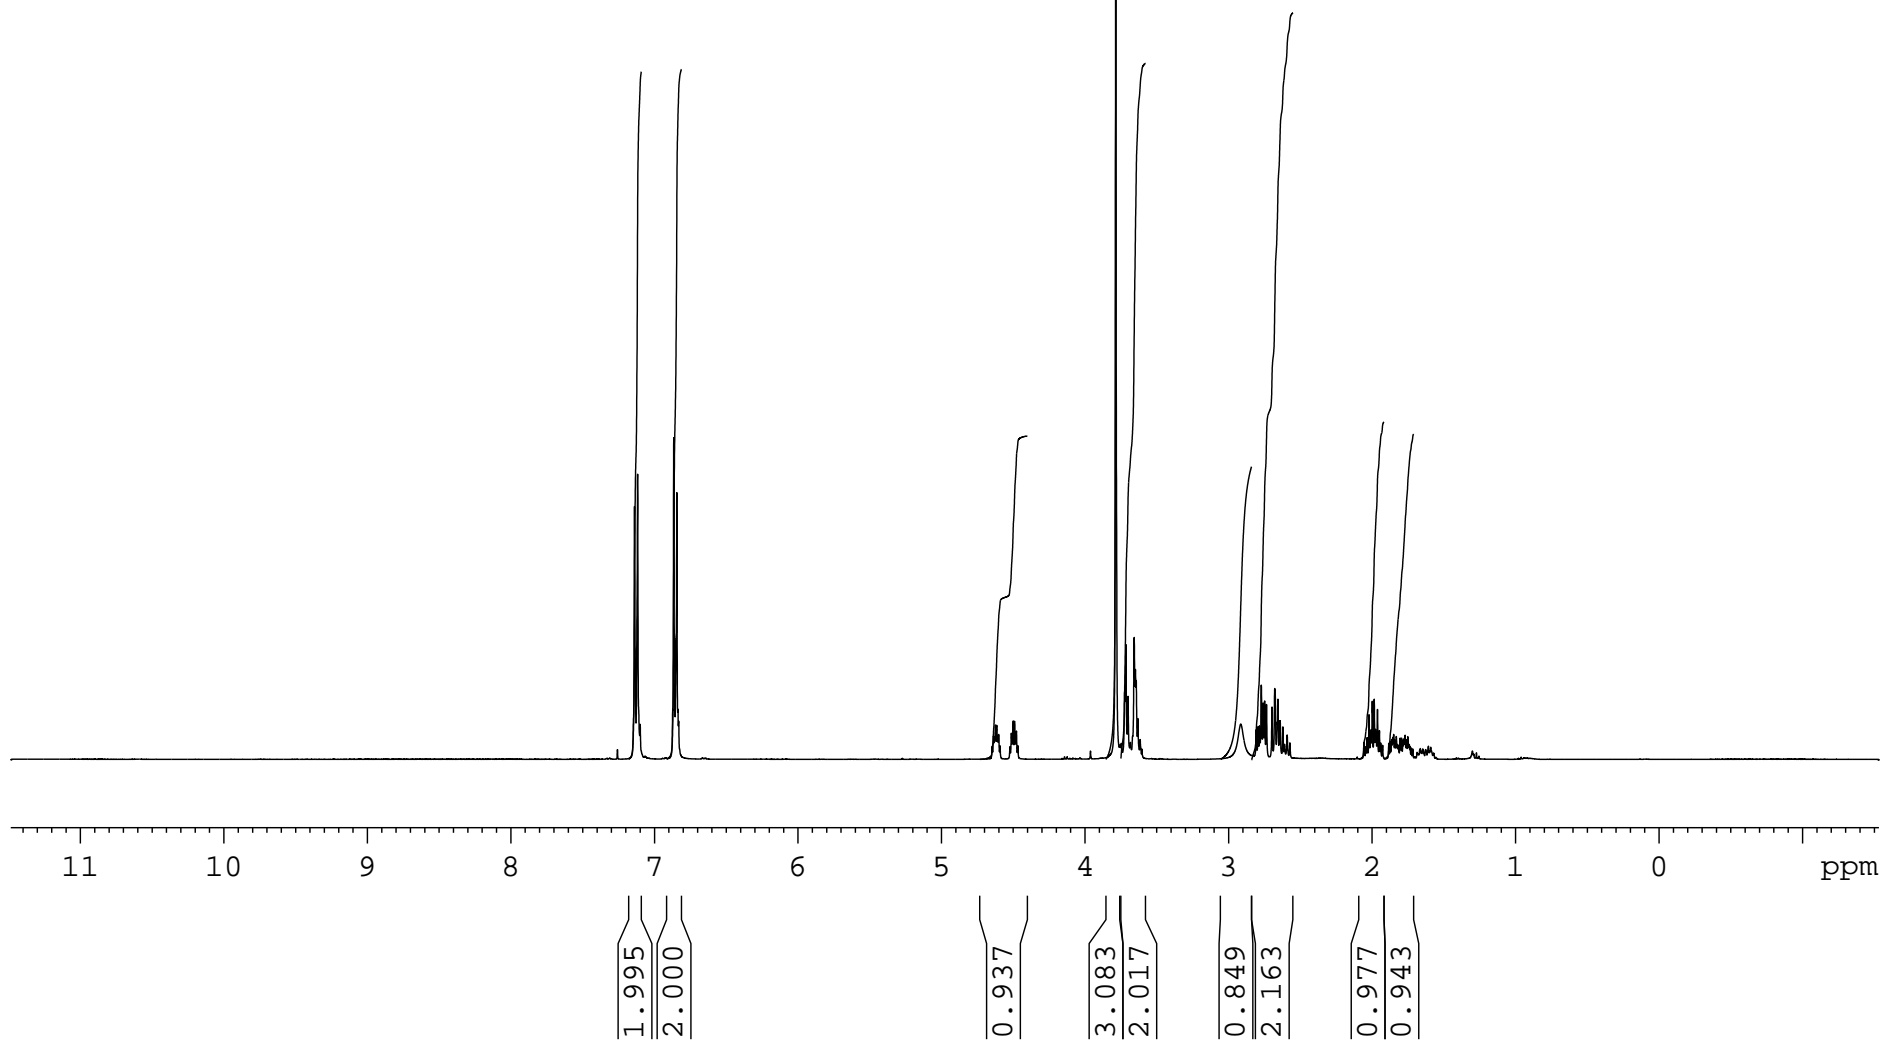

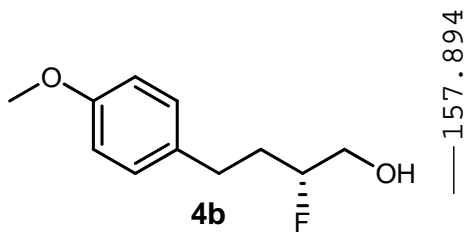

(*R*)-2-fluoro-4-(4-methoxyphenyl)butan-1-ol  
Solvent: CDCl<sub>3</sub>  
100.6 MHz

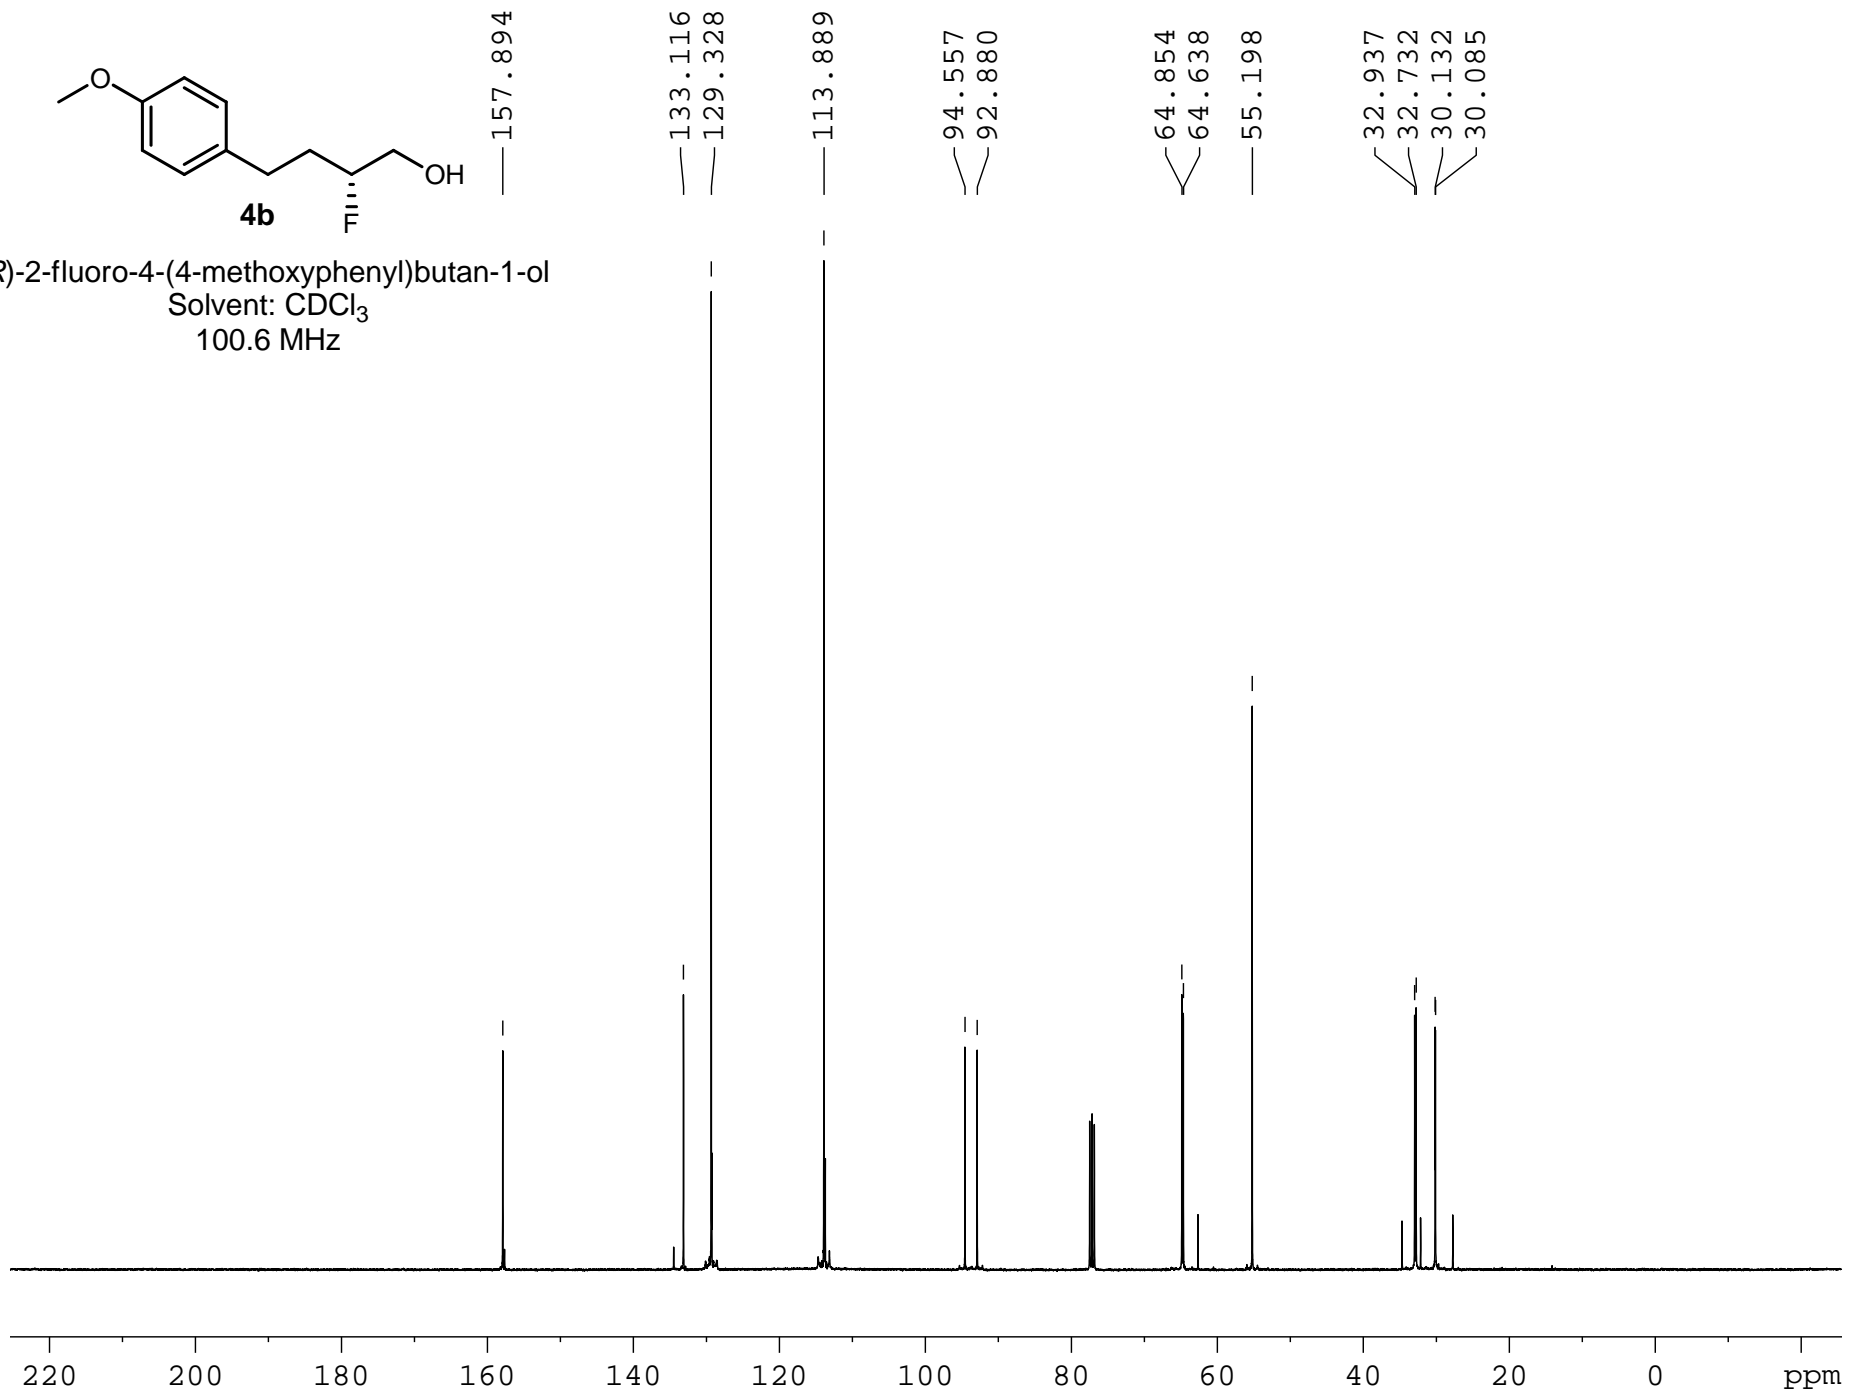

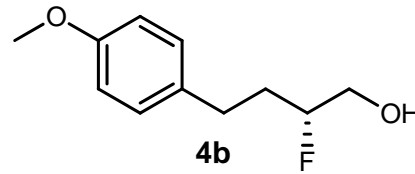

## Elemental Composition Report

### Single Mass Analysis

Tolerance = 5.0 PPM / DBE: min = -0.5, max = 25.0

Element prediction: Off

Number of isotope peaks used for i-FIT = 2

Monoisotopic Mass, Even Electron Ions

12 formula(e) evaluated with 1 results within limits (up to 50 best isotopic matches for each mass)

Elements Used:

C: 10-500 H: 10-1000 O: 1-200 F: 1-1 Na: 1-1

**MCO-IV-148**

S/N: UH193

MCO-IV-148\_120612\_001 79 (1.473) AM (Cen,4, 80.00, Ar,8000.0,556.28,0.70); Sm (SG, 2x1.00); Cm (70:80)

06-Dec-2012  
13:37:14  
TOF MS ES+  
3.78e+003

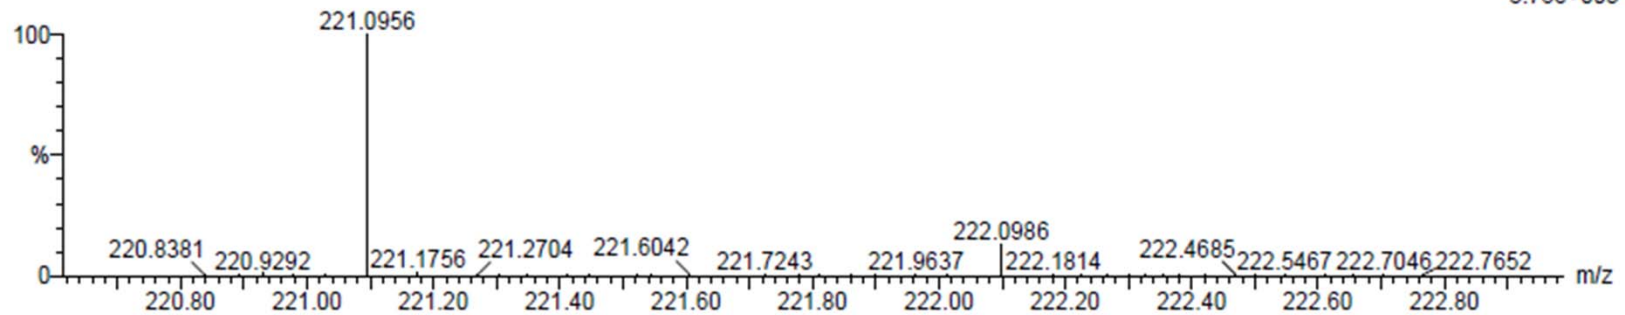

Minimum: -0.5  
Maximum: 5.0 5.0 25.0

| Mass            | Calc. Mass      | mDa        | PPM        | DBE        | i-FIT      | Formula                |
|-----------------|-----------------|------------|------------|------------|------------|------------------------|
| <b>221.0956</b> | <b>221.0954</b> | <b>0.2</b> | <b>0.9</b> | <b>3.5</b> | <b>0.3</b> | <b>C11 H15 O2 F Na</b> |

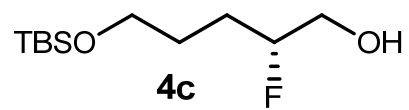

(*R*)-5-((*tert*-butyldimethylsilyl)oxy)-2-fluoropentan-1-ol

Solvent: CDCl<sub>3</sub>

400.13 MHz

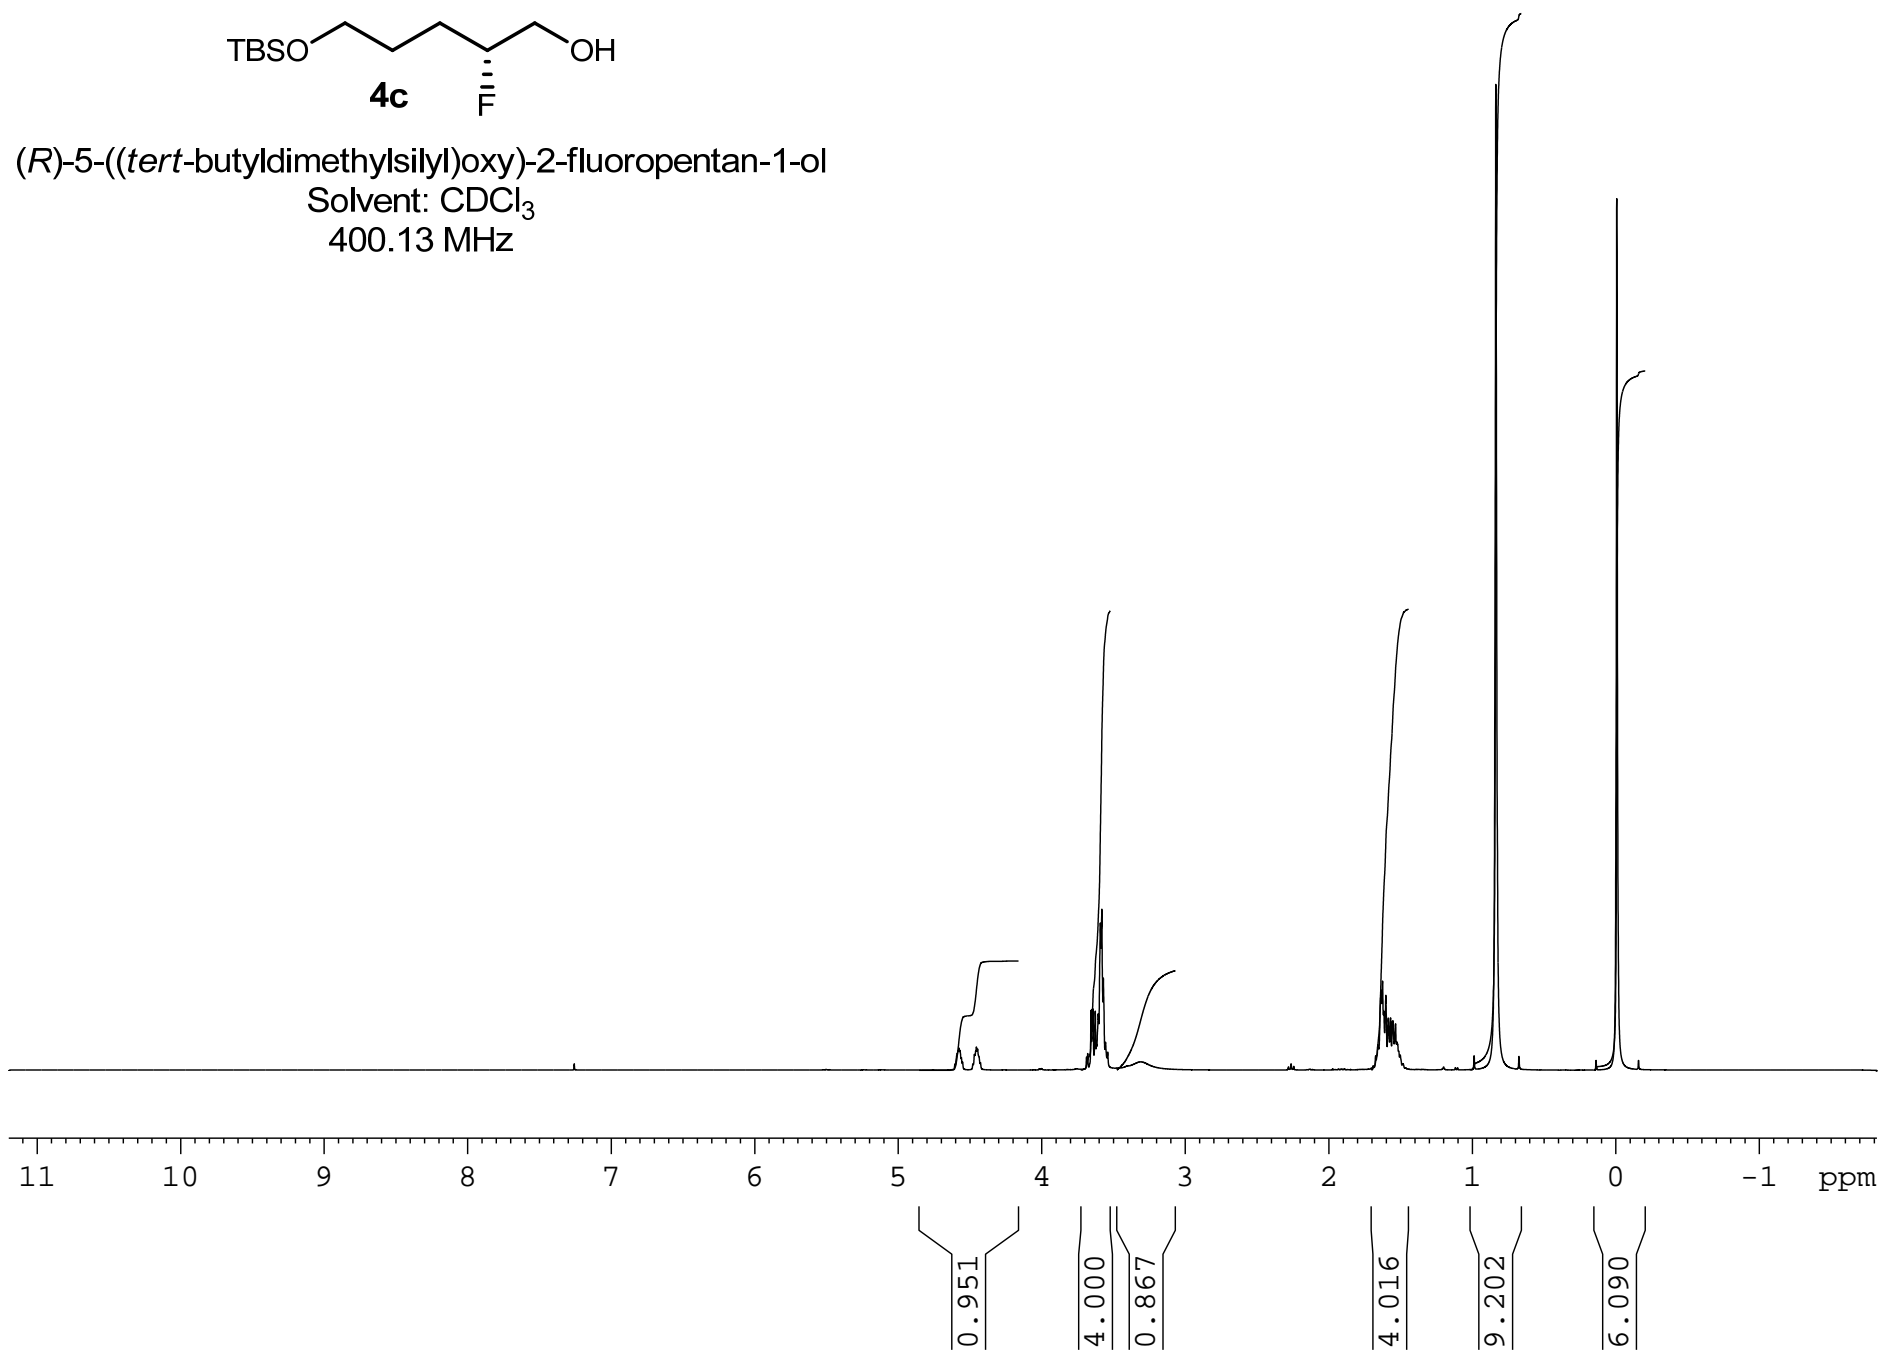



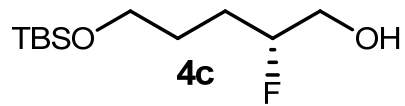

(*R*)-5-((*tert*-butyldimethylsilyl)oxy)-2-fluoropentan-1-ol  
Solvent: CDCl<sub>3</sub>  
100.6 MHz

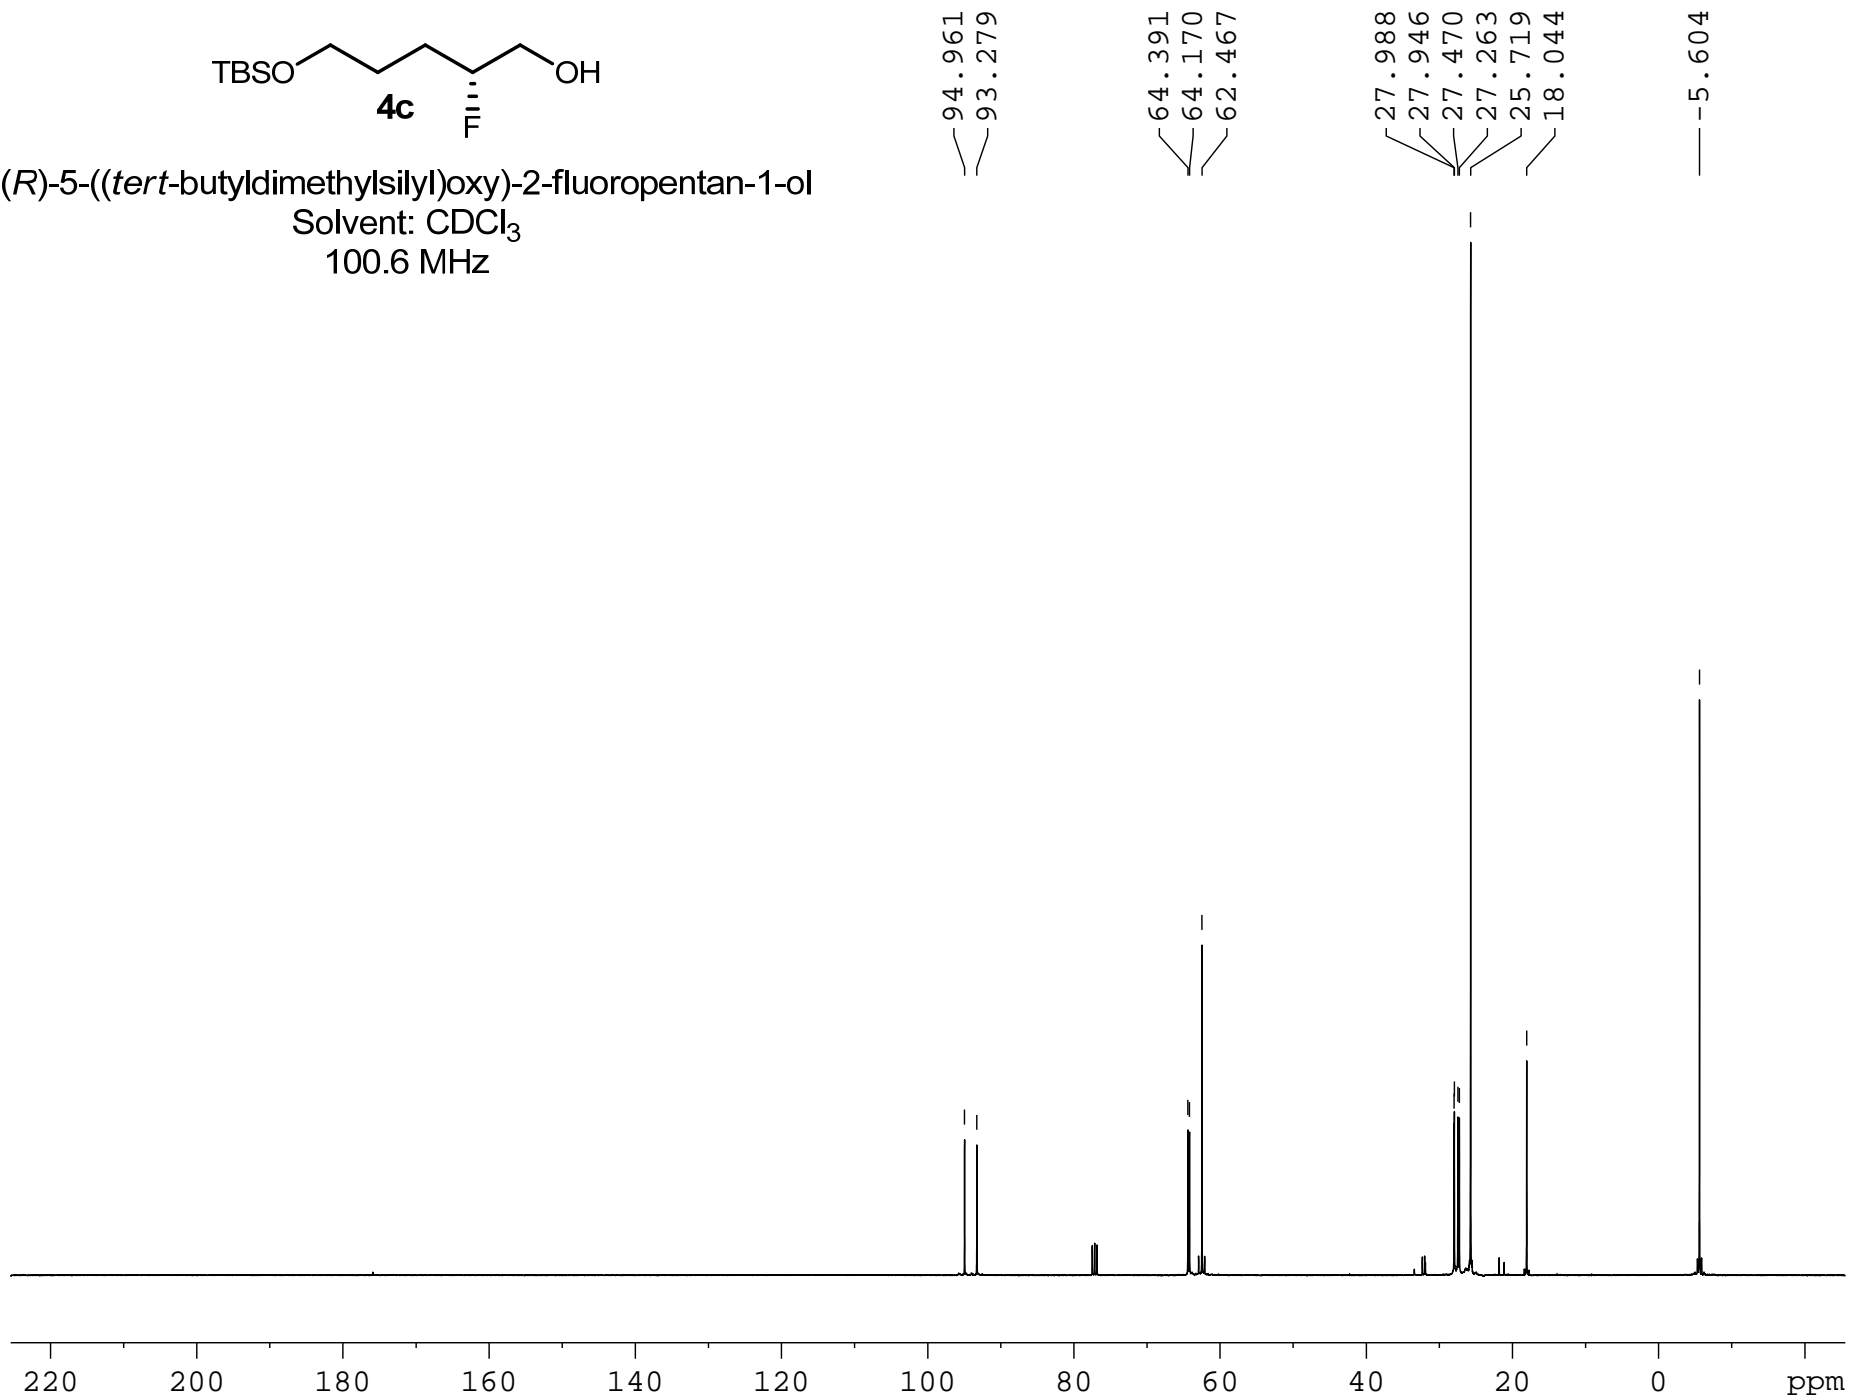

## Elemental Composition Report

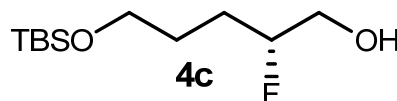

### Single Mass Analysis

Tolerance = 5.0 PPM / DBE: min = -0.5, max = 25.0

Element prediction: Off

Number of isotope peaks used for i-FIT = 2

Monoisotopic Mass, Even Electron Ions

13 formula(e) evaluated with 1 results within limits (up to 50 best isotopic matches for each mass)

Elements Used:

C: 10-500 H: 10-1000 O: 1-200 F: 1-1 Si: 1-1

MCO-IV-166

S/N: UH193

MCO-IV-166\_120712\_001 51 (0.954) AM (Cen,4, 80.00, Ar,8000.0,556.28,0.70); Sm (SG, 2x1.00); Cm (50:60)

07-Dec-2012  
10:27:41  
TOF MS ES+  
7.10e+003

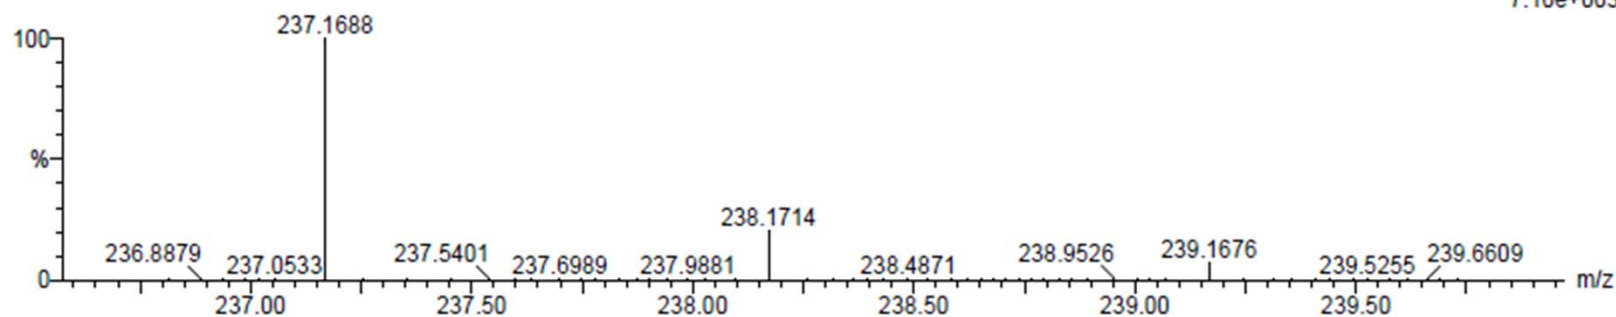

Minimum: -0.5  
Maximum: 5.0 5.0 25.0

| Mass     | Calc. Mass | mDa | PPM | DBE  | i-FIT | Formula         |
|----------|------------|-----|-----|------|-------|-----------------|
| 237.1688 | 237.1686   | 0.2 | 0.8 | -0.5 | 7.8   | C11 H26 O2 F Si |

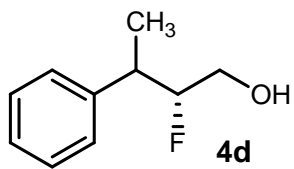

(2*R*)-2-fluoro-3-phenylbutan-1-ol  
Diastereomer A  
Solvent: CDCl<sub>3</sub>  
400.13 MHz

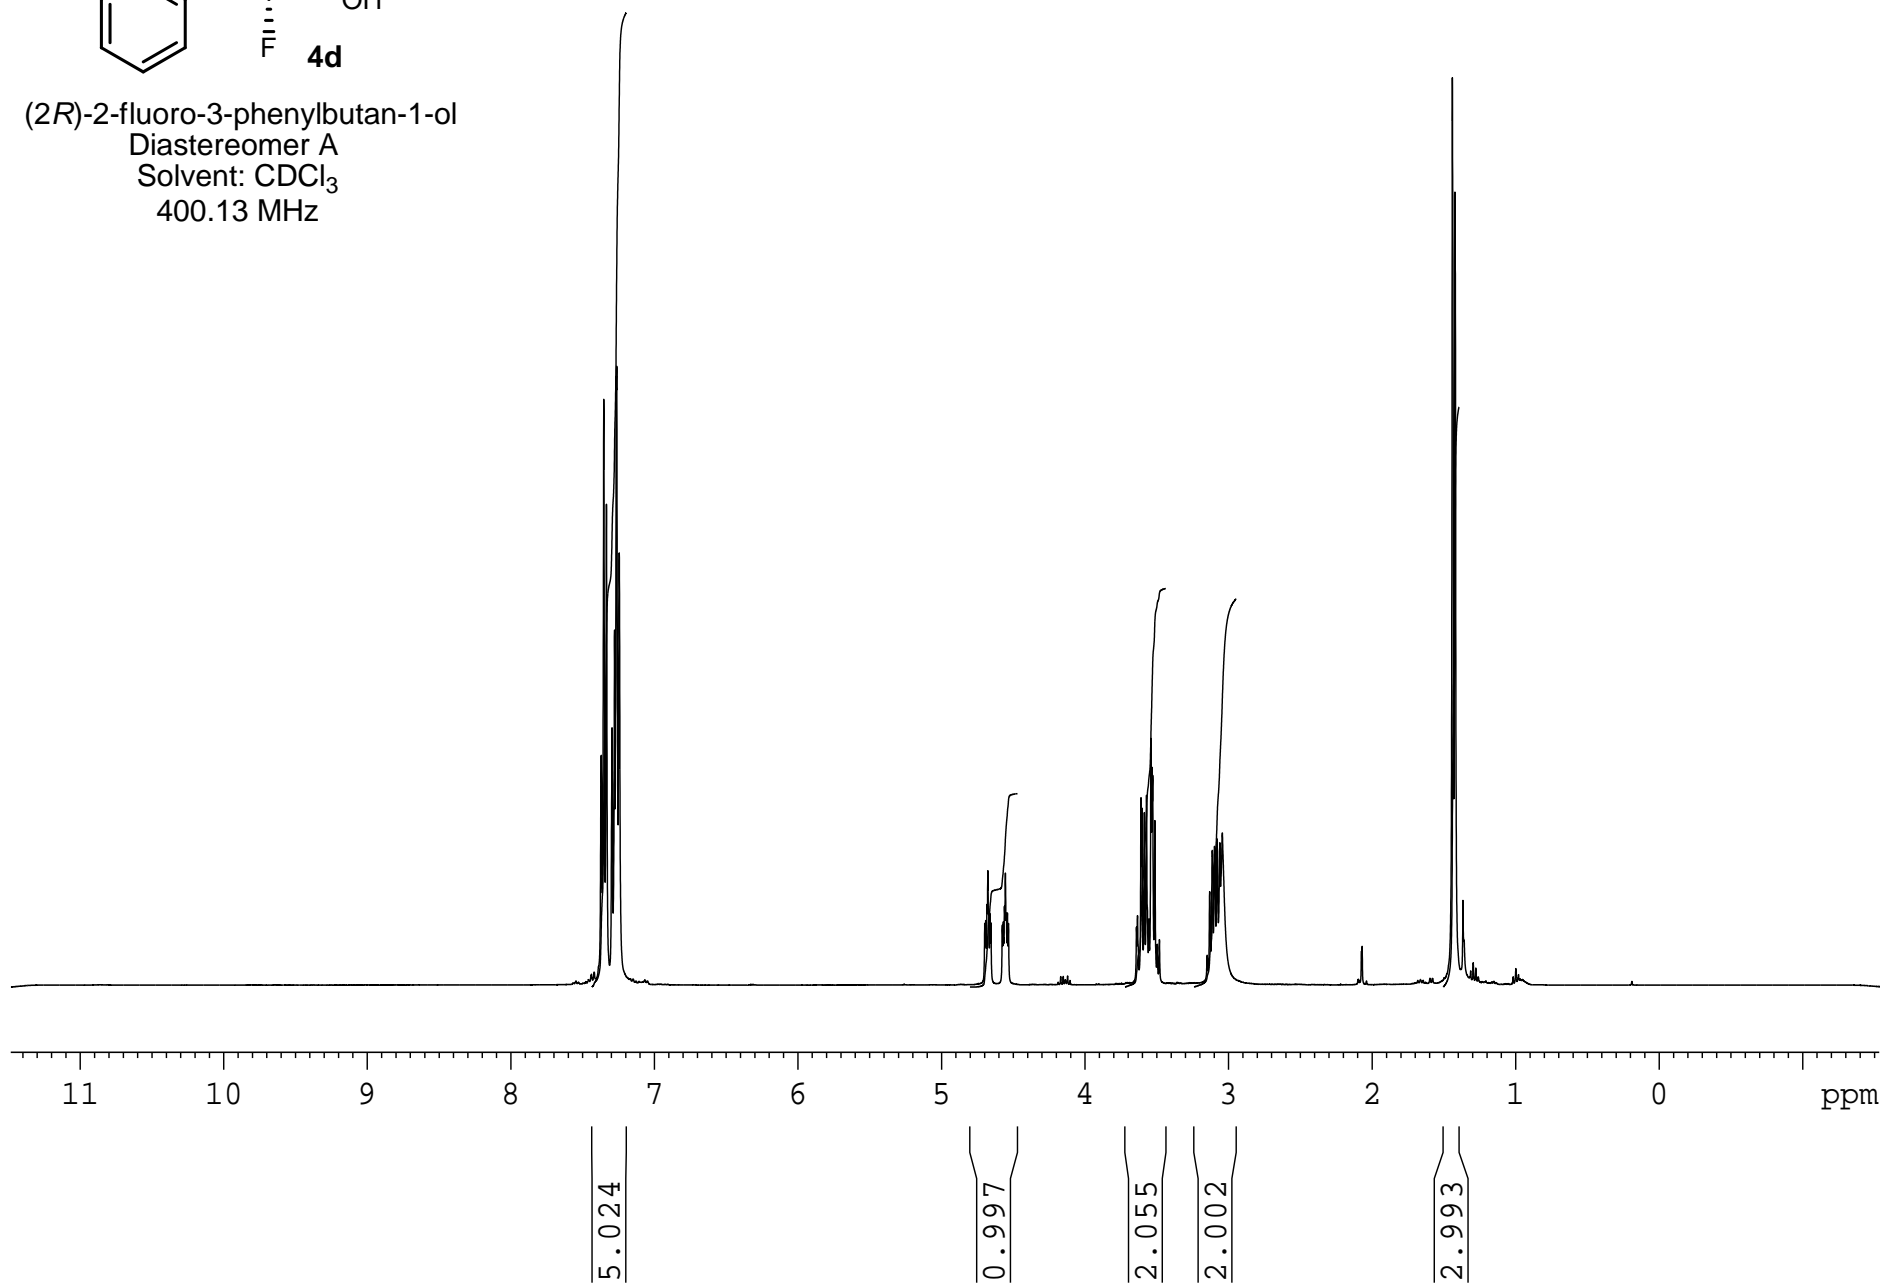

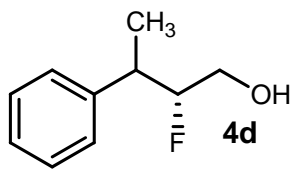

(2*R*)-2-fluoro-3-phenylbutan-1-ol  
Diastereomer A  
Solvent: CDCl<sub>3</sub>  
100.6 MHz

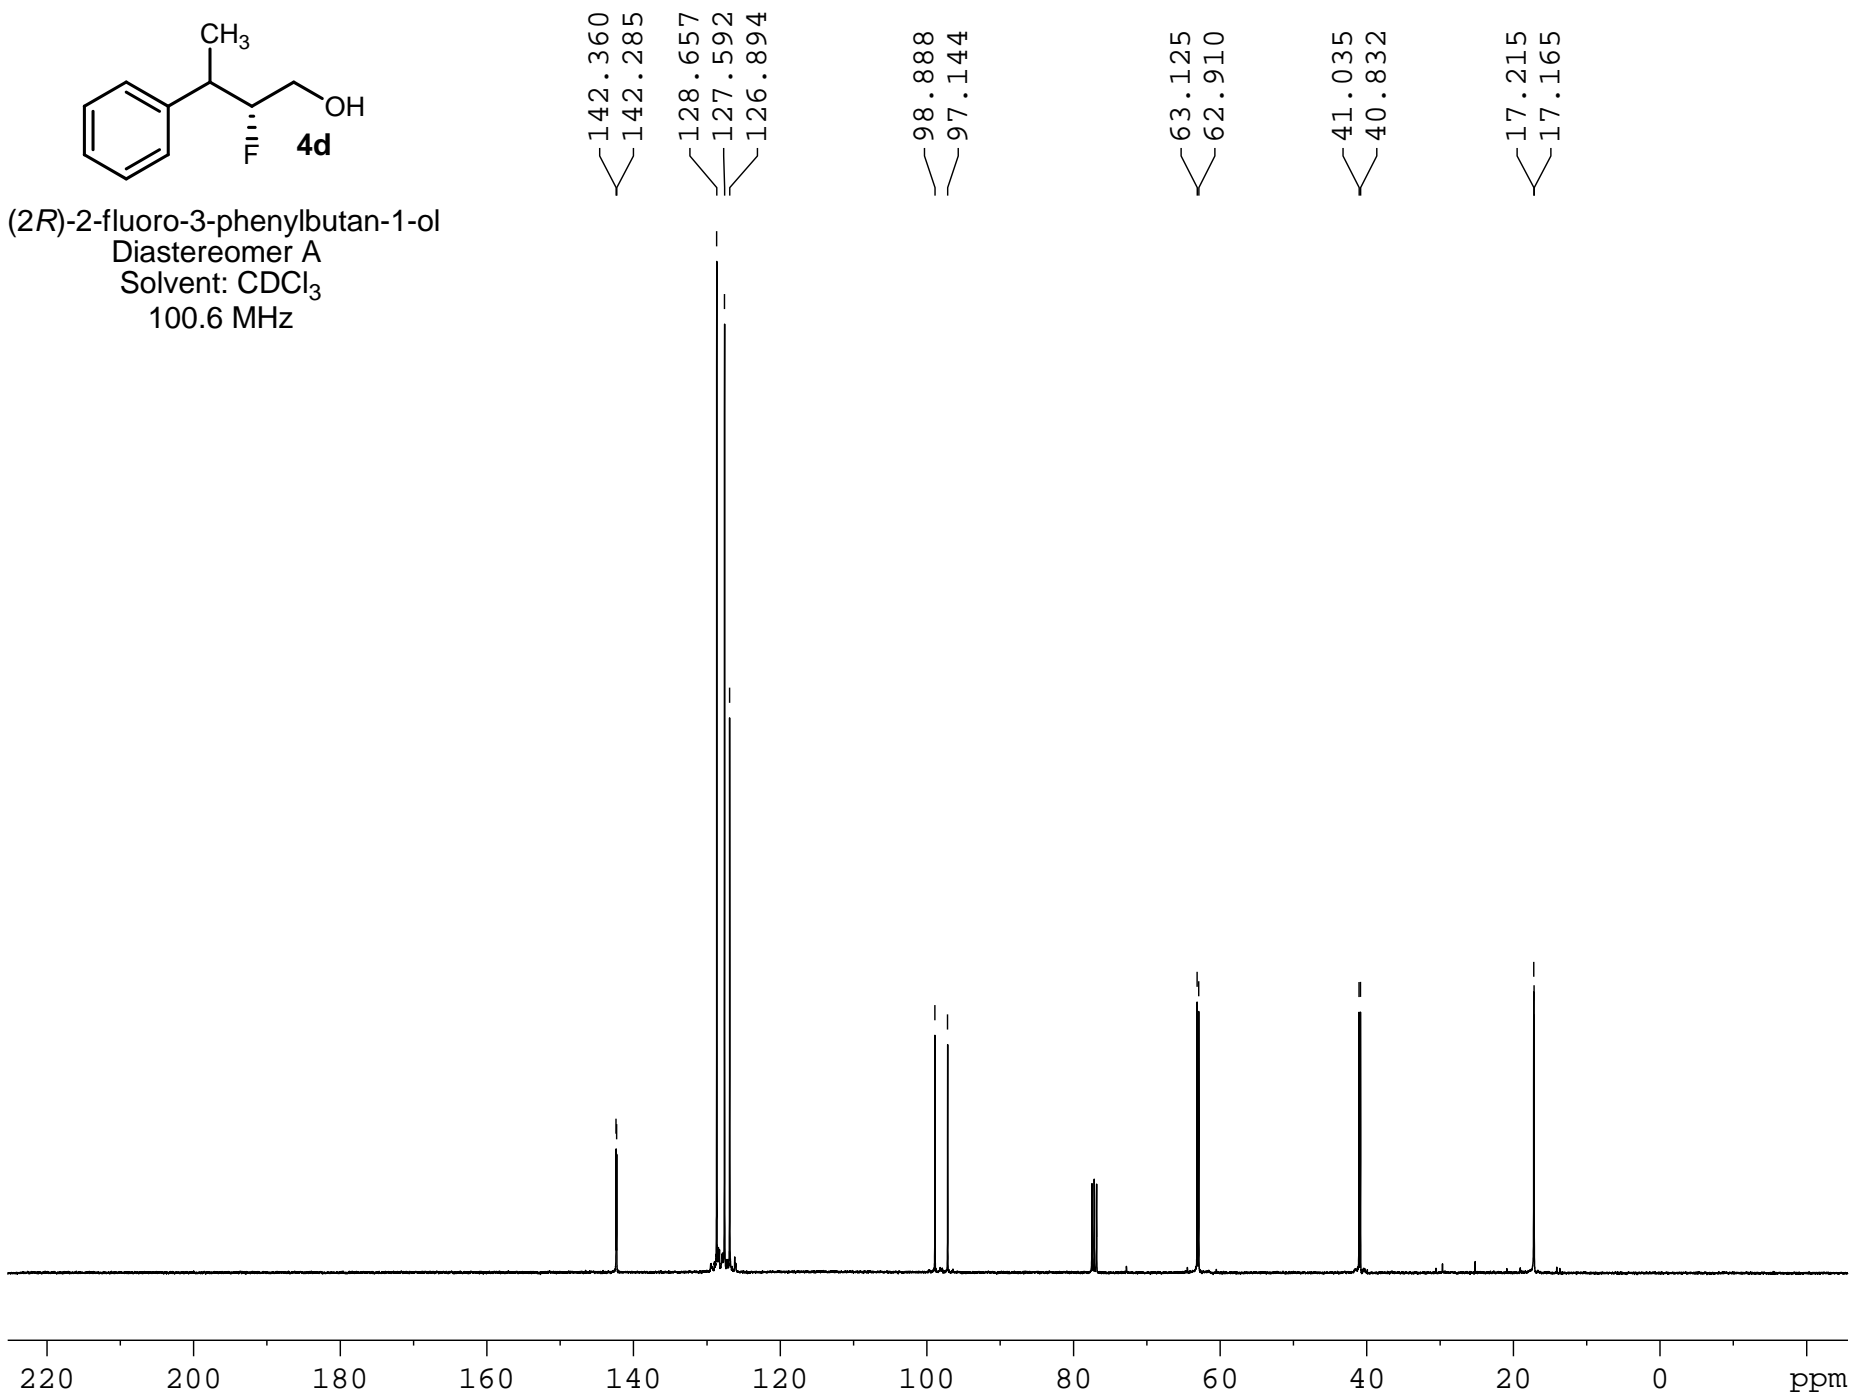

## Elemental Composition Report

### Single Mass Analysis

Tolerance = 5.0 PPM / DBE: min = -0.5, max = 25.0

Element prediction: Off

Number of isotope peaks used for i-FIT = 2

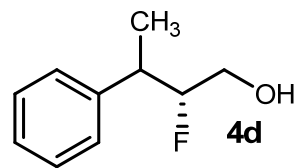

Diastereomer A

Page 1

Monoisotopic Mass, Even Electron Ions

8 formula(e) evaluated with 1 results within limits (up to 50 best isotopic matches for each mass)

Elements Used:

C: 10-500 H: 10-1000 O: 1-200 F: 1-1 Na: 1-1

MCO-IV-153 Non-Polar

S/N: UH193

MCO-IV-153-NP\_120612\_001 60 (1.121) AM (Cen,4, 80.00, Ar,8000.0,556.28,0.70); Sm (SG, 2x1.00); Cm (50:60)

06-Dec-2012  
15:53:48  
TOF MS ES+  
2.48e+003

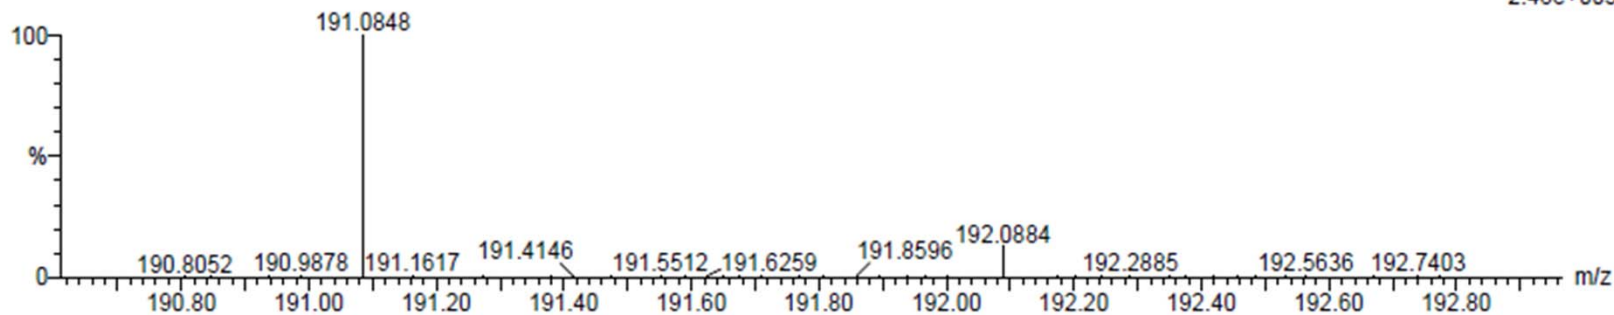

Minimum: -0.5  
Maximum: 5.0 5.0 25.0

| Mass     | Calc. Mass | mDa | PPM | DBE | i-FIT | Formula        |
|----------|------------|-----|-----|-----|-------|----------------|
| 191.0848 | 191.0848   | 0.0 | 0.0 | 3.5 | 1.1   | C10 H13 O F Na |

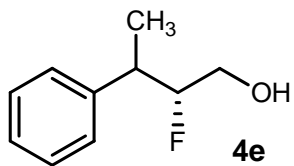

(2*R*)-2-fluoro-3-phenylbutan-1-ol  
Diastereomer B  
Solvent: CDCl<sub>3</sub>  
400.13 MHz

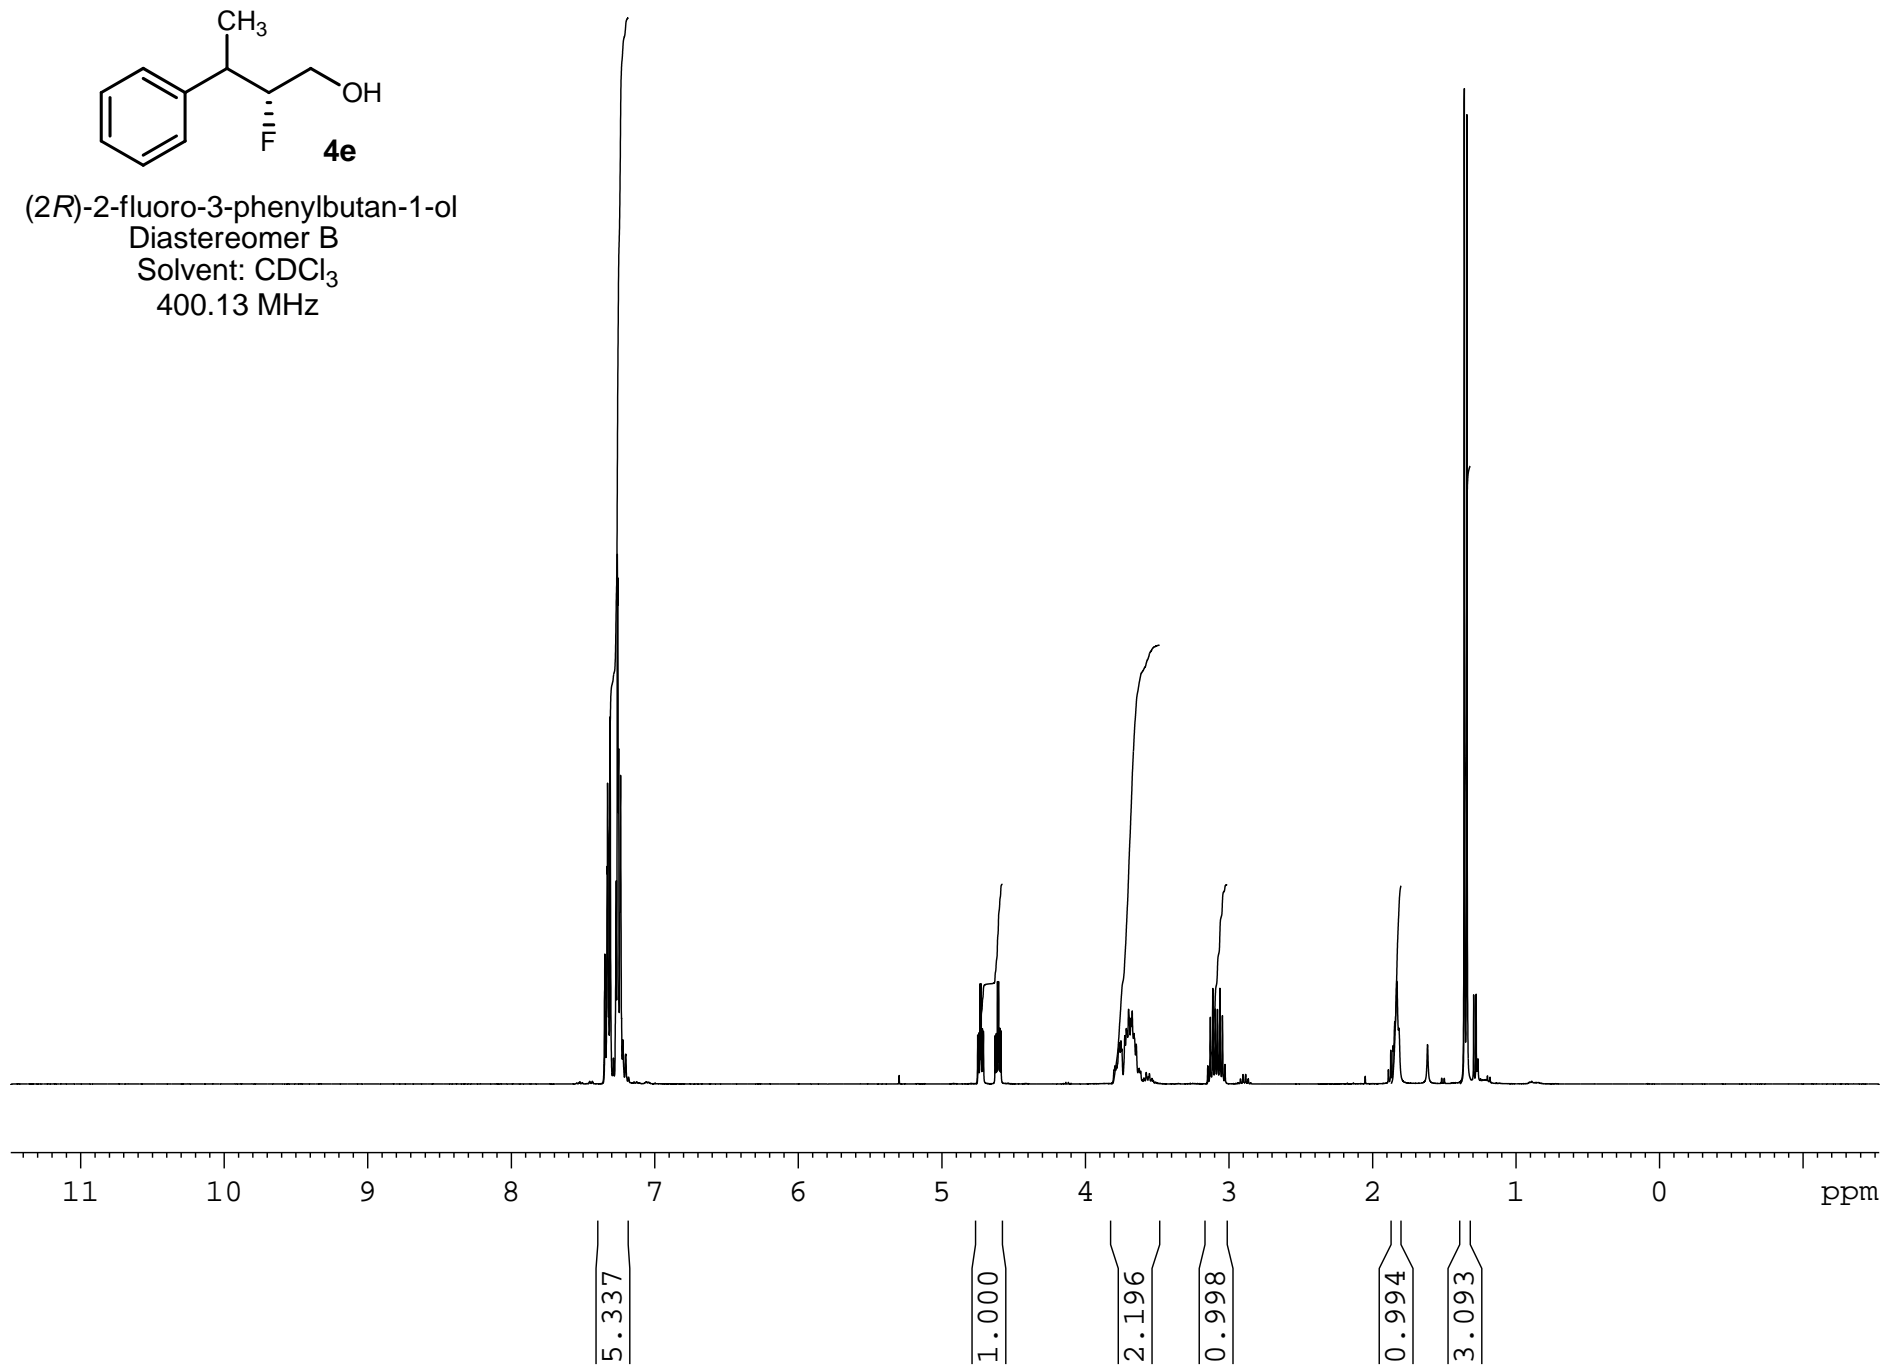

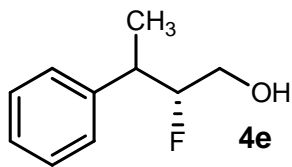

(2*R*)-2-fluoro-3-phenylbutan-1-ol  
Diastereomer B  
Solvent: CDCl<sub>3</sub>  
125 MHz

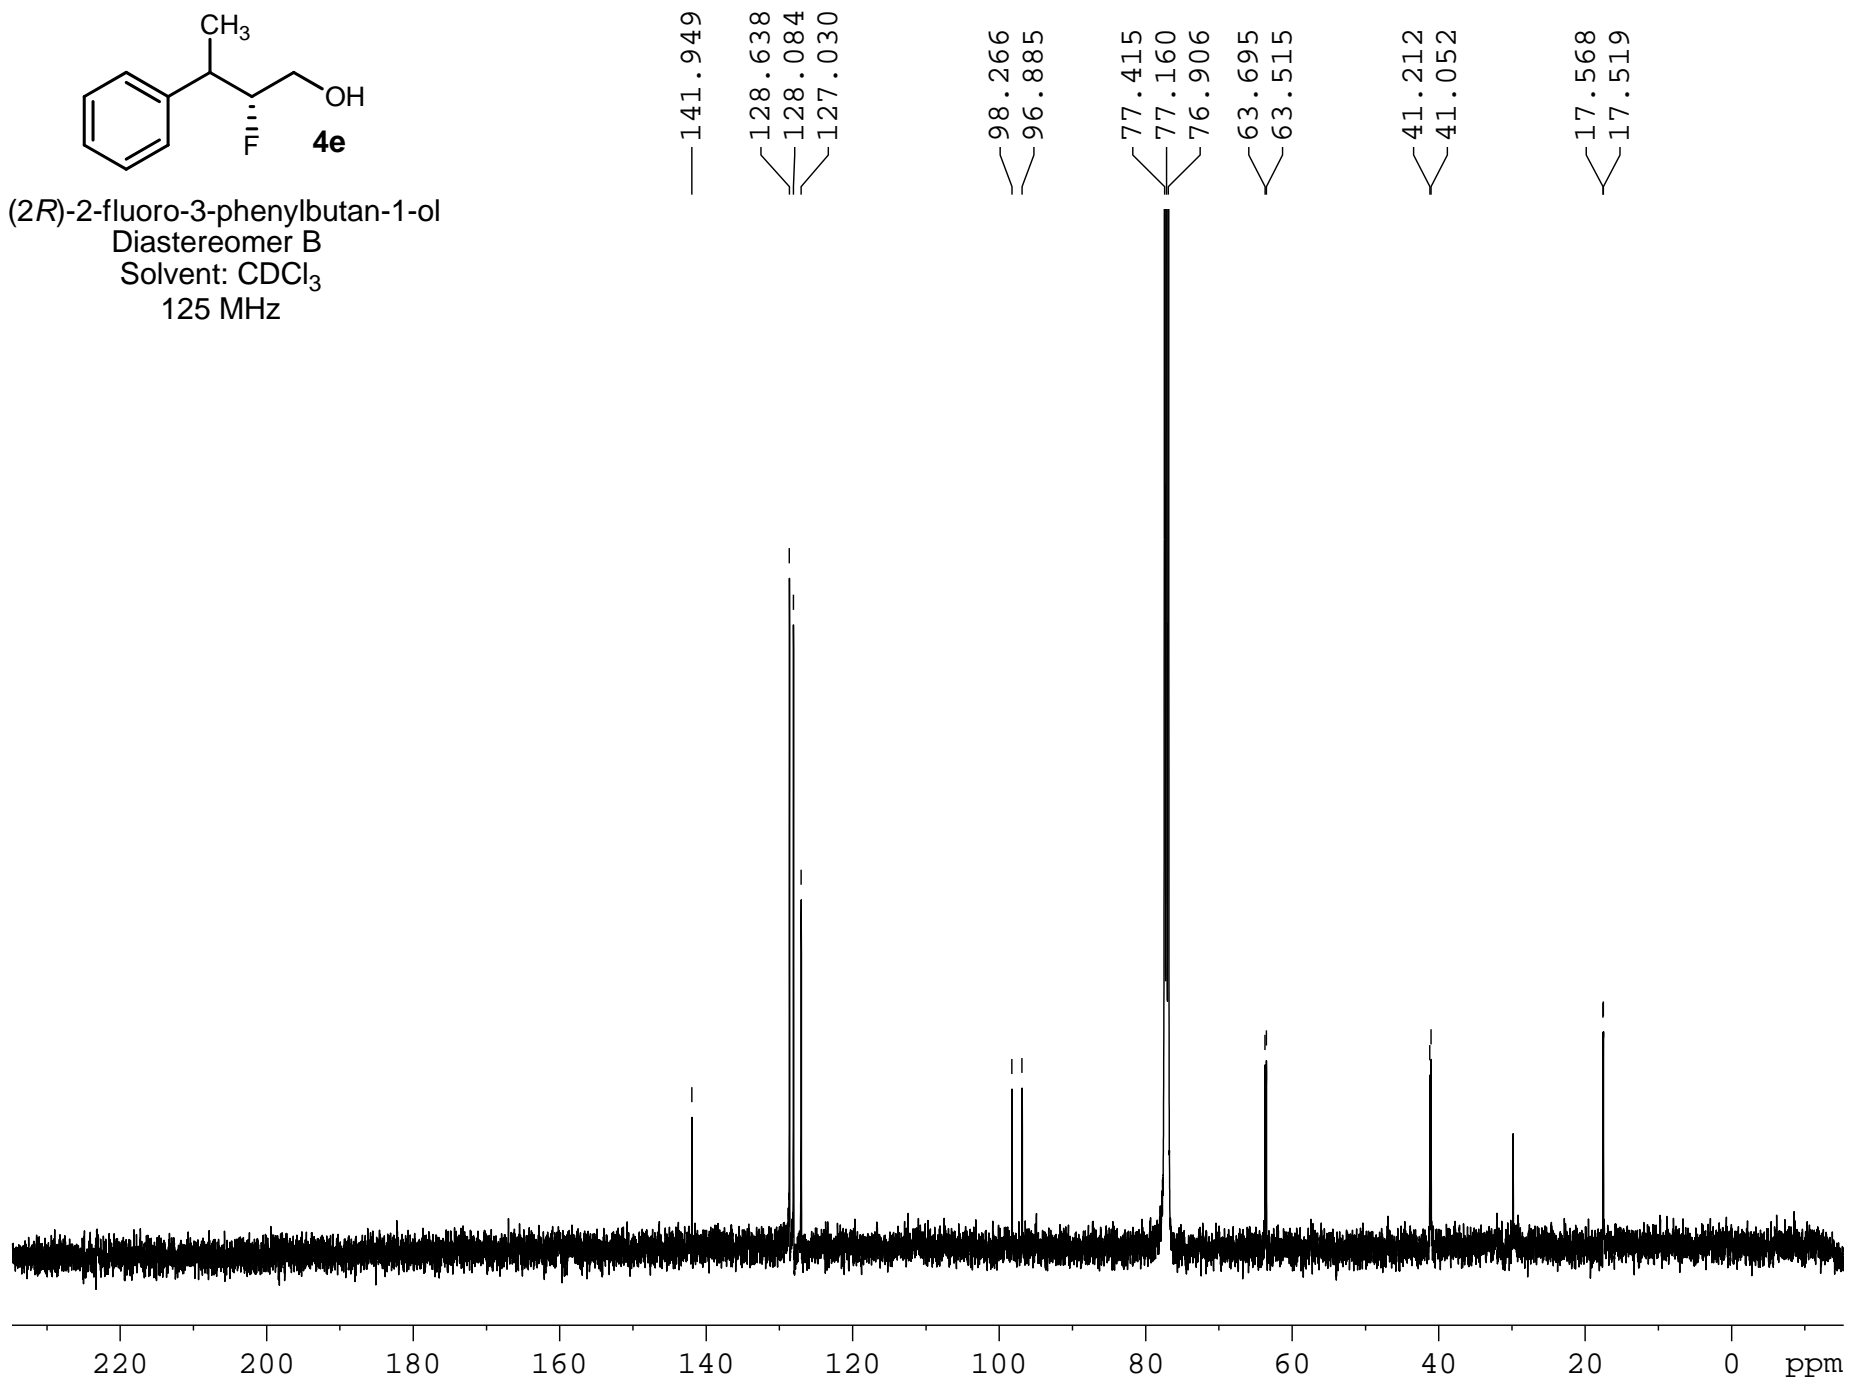

## Elemental Composition Report

### Single Mass Analysis

Tolerance = 5.0 PPM / DBE: min = -0.5, max = 25.0

Element prediction: Off

Number of isotope peaks used for i-FIT = 2

Monoisotopic Mass, Even Electron Ions

8 formula(e) evaluated with 1 results within limits (up to 50 best isotopic matches for each mass)

Elements Used:

C: 10-500 H: 10-1000 O: 1-200 F: 1-1 Na: 1-1

MCO-IV-153 Polar

S/N: UH193

MCO-IV-153-P\_120612\_001 98 (1.825) AM (Cen,4, 80.00, Ar,8000.0,556.28,0.70); Sm (SG, 2x1.00); Cm (90:100)

06-Dec-201:  
16:00:21  
TOF MS ES+  
1.38e+00:

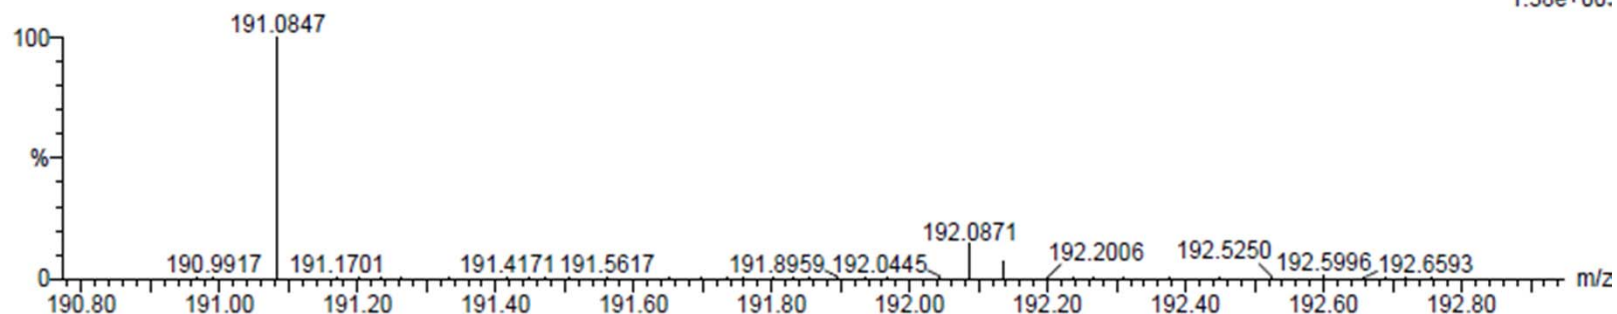

Minimum: -0.5  
Maximum: 5.0 5.0 25.0

| Mass     | Calc. Mass | mDa  | PPM  | DBE | i-FIT | Formula        |
|----------|------------|------|------|-----|-------|----------------|
| 191.0847 | 191.0848   | -0.1 | -0.5 | 3.5 | 3.6   | C10 H13 O F Na |

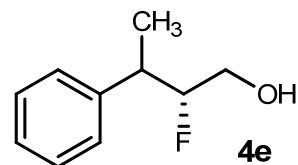

Diastereomer B



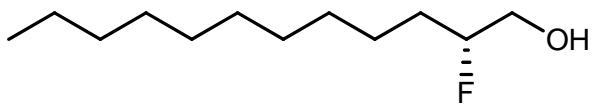

(*R*)-2-fluorododecan-1-ol  
Solvent: CDCl<sub>3</sub> **4f**  
400.13 MHz

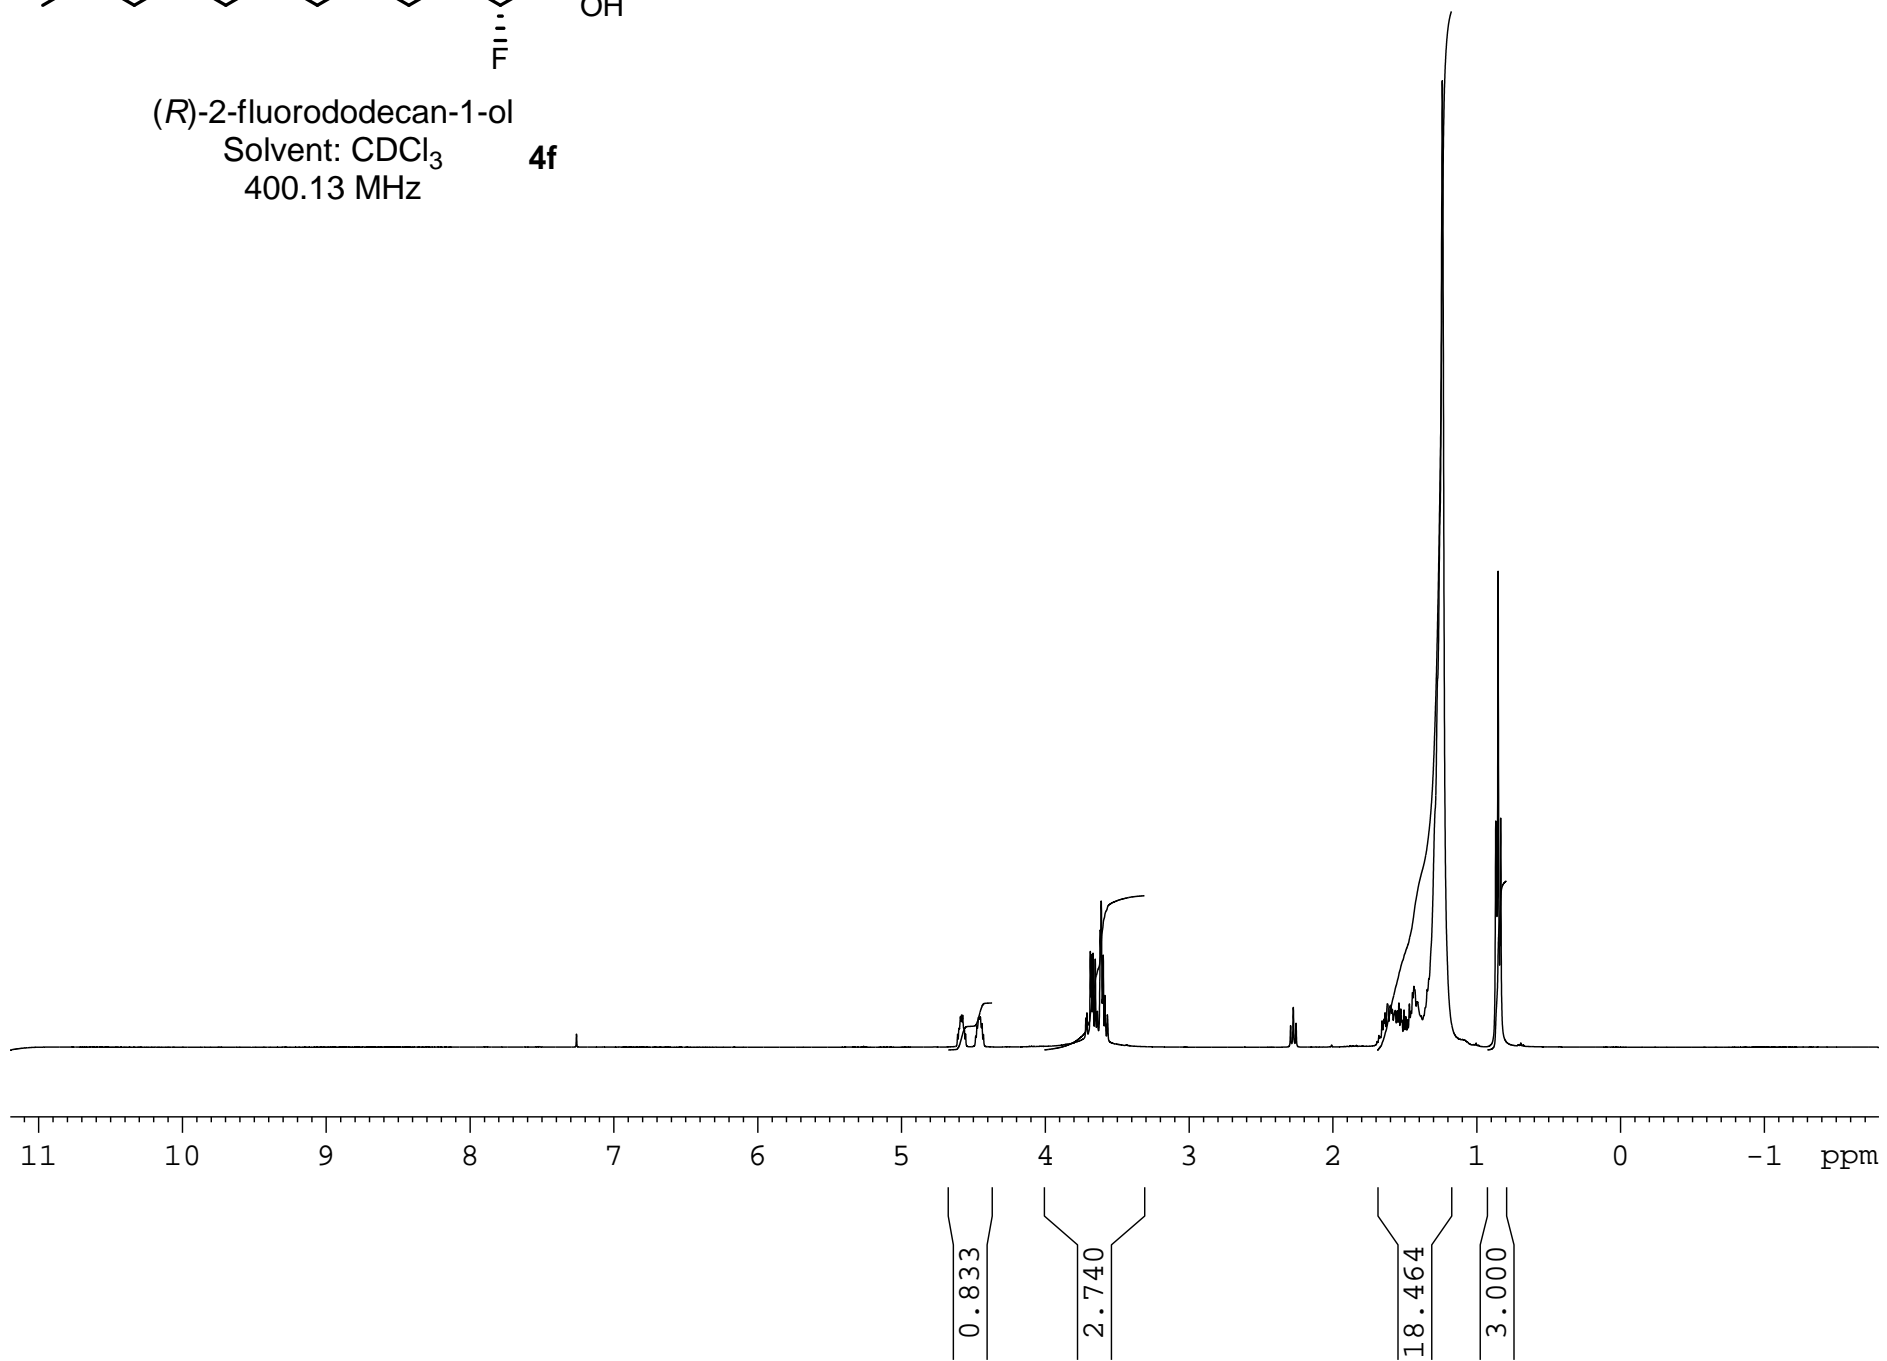

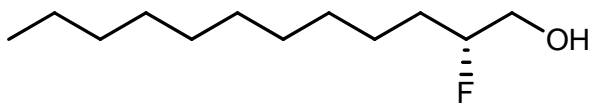

(*R*)-2-fluorododecan-1-ol  
Solvent: CDCl<sub>3</sub>  
100.6 MHz **4f**

95.662  
93.992

65.063  
64.846

31.993  
31.171  
30.968  
29.688  
29.650  
29.566  
29.541  
29.418  
25.044  
24.997  
22.757  
14.139

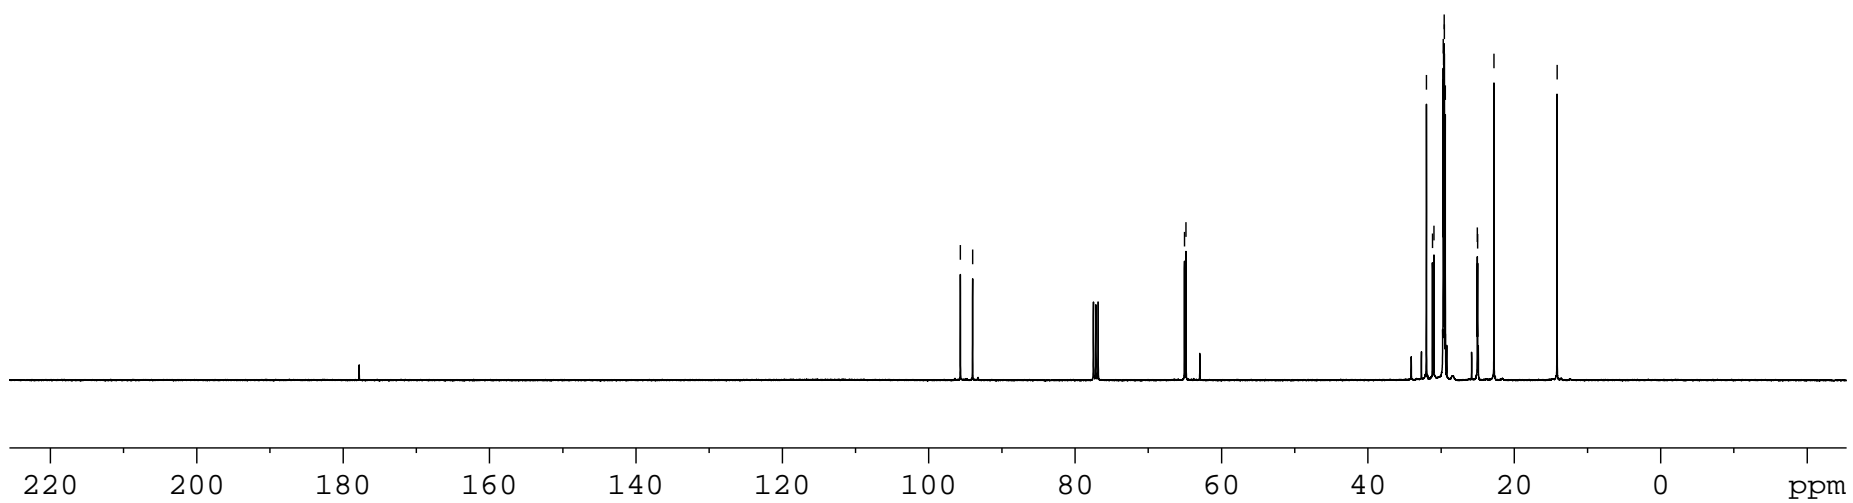

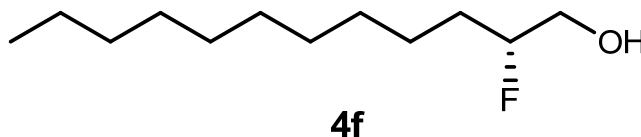

## Elemental Composition Report

Page 1

### Single Mass Analysis

Tolerance = 5.0 PPM / DBE: min = -0.5, max = 25.0

Element prediction: Off

Number of isotope peaks used for i-FIT = 2

Monoisotopic Mass, Even Electron Ions

13 formula(e) evaluated with 1 results within limits (up to 50 best isotopic matches for each mass)

Elements Used:

C: 10-500 H: 10-1000 O: 1-200 F: 1-1 Na: 1-1

MCO-IV-147

S/N: UH193

MCO-IV-147\_120612\_001 70 (1.306) AM (Cen,4, 80.00, Ar,8000.0,556.28,0.70); Sm (SG, 2x1.00); Cm (60:70)

06-Dec-2012

13:14:46

TOF MS ES+

4.68e+003

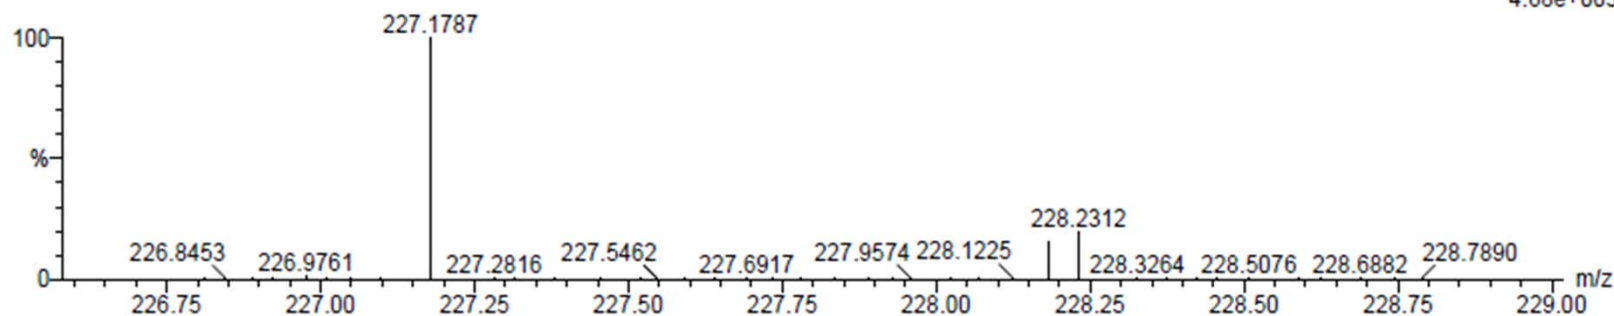

Minimum:

Maximum:

5.0 5.0 -0.5

5.0 25.0

| Mass | Calc. Mass | mDa | PPM | DBE | i-FIT | Formula |
|------|------------|-----|-----|-----|-------|---------|
|------|------------|-----|-----|-----|-------|---------|

|          |          |     |     |      |     |                |
|----------|----------|-----|-----|------|-----|----------------|
| 227.1787 | 227.1787 | 0.0 | 0.0 | -0.5 | 4.0 | C12 H25 O F Na |
|----------|----------|-----|-----|------|-----|----------------|

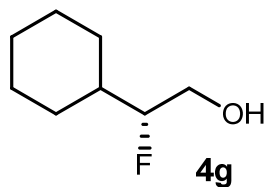

(*R*)-2-cyclohexyl-2-fluoroethanol  
Solvent: CDCl<sub>3</sub>  
400.13 MHz

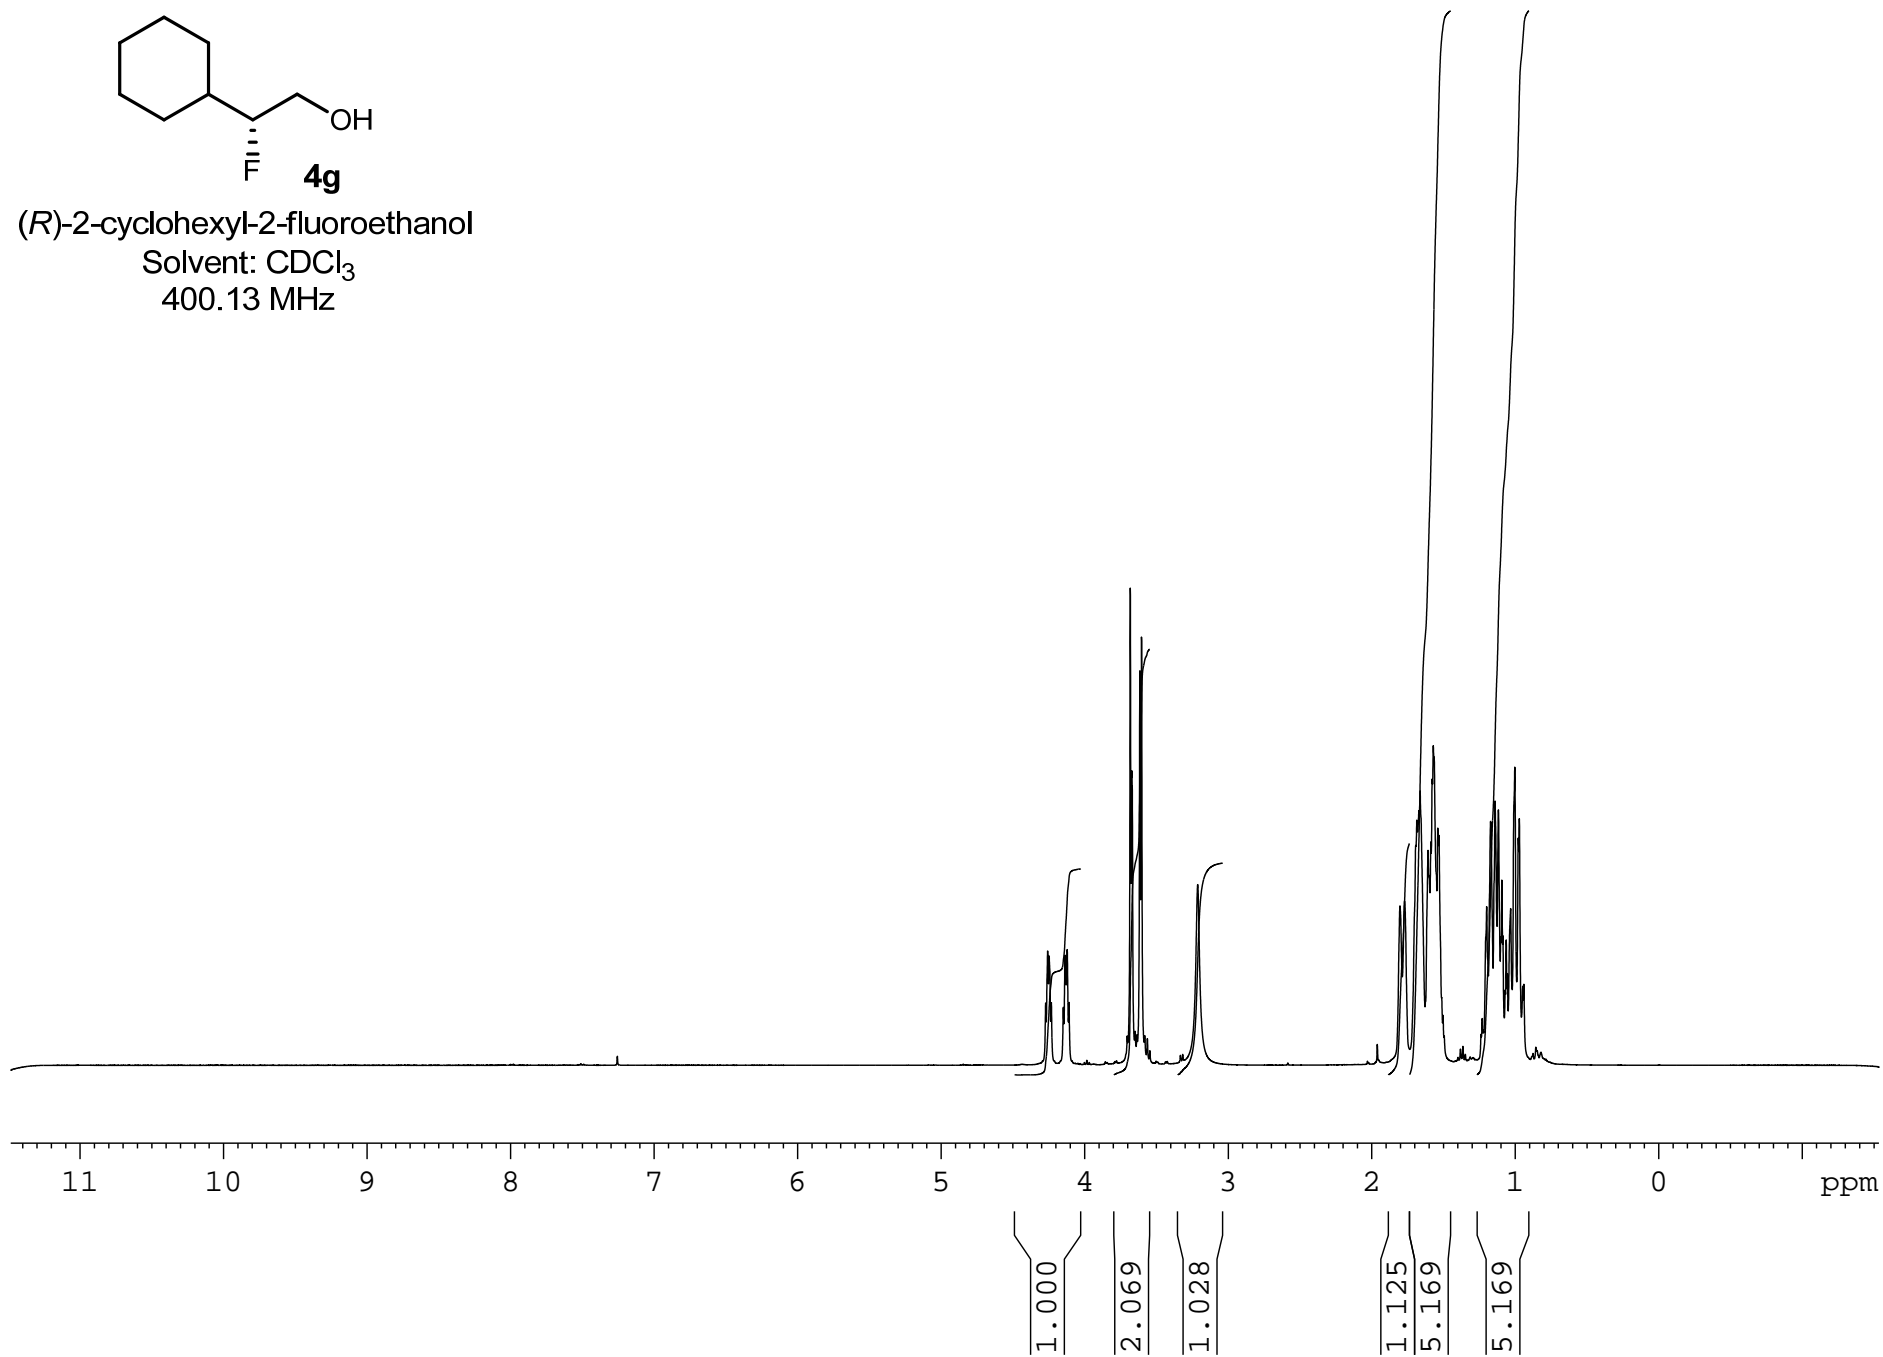

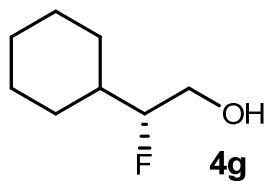

(*R*)-2-cyclohexyl-2-fluoroethanol  
Solvent: CDCl<sub>3</sub>  
100.6 MHz

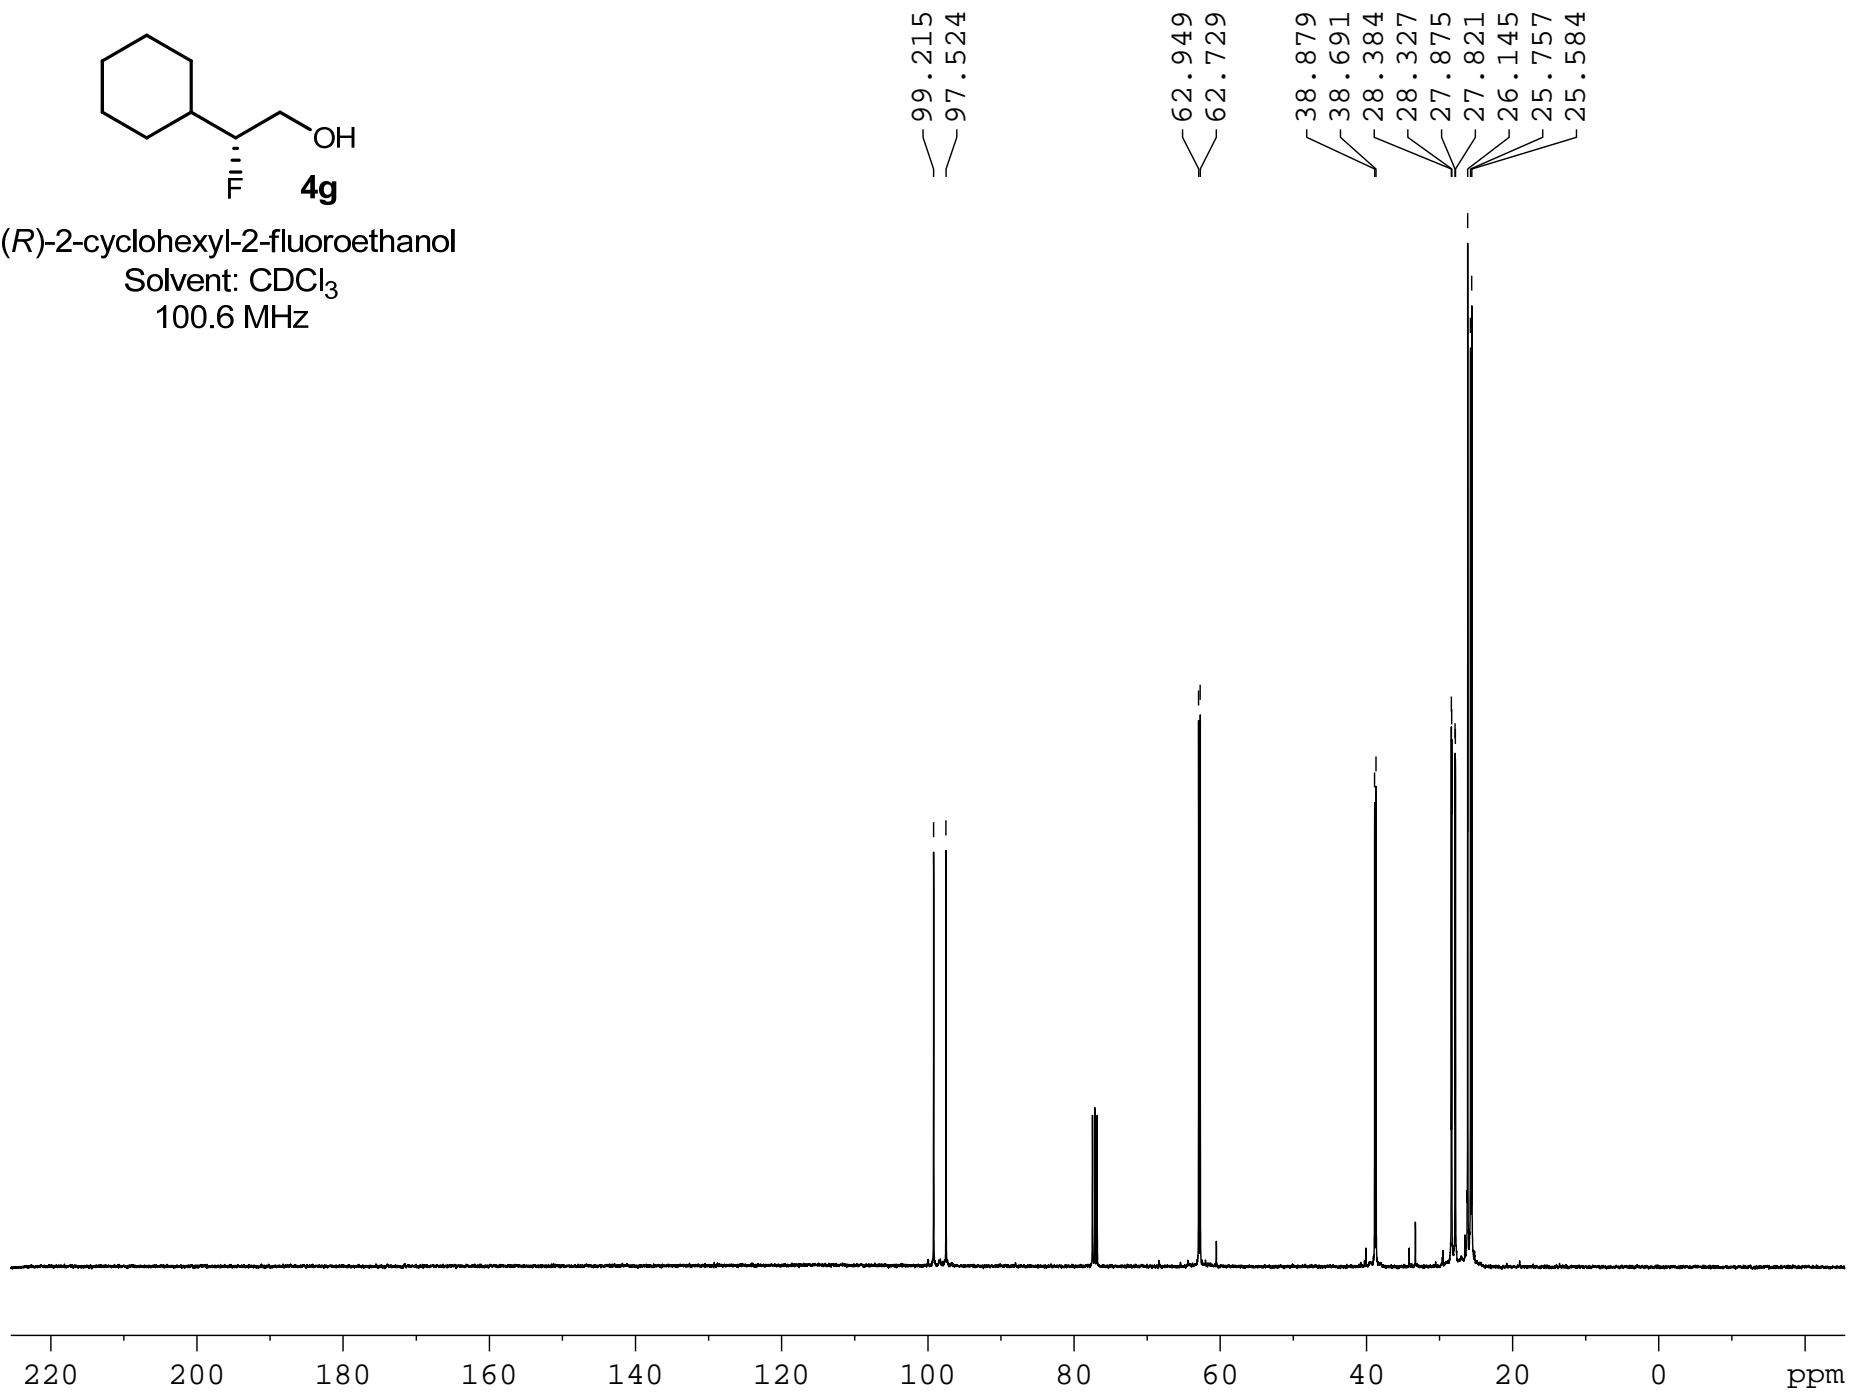

## Elemental Composition Report

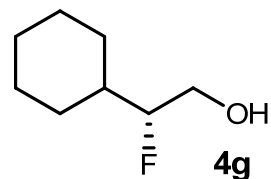

Page 1

### Single Mass Analysis

Tolerance = 5.0 PPM / DBE: min = -0.5, max = 25.0

Element prediction: Off

Number of isotope peaks used for i-FIT = 2

Monoisotopic Mass, Even Electron Ions

8 formula(e) evaluated with 1 results within limits (up to 50 best isotopic matches for each mass)

Elements Used:

C: 5-500 H: 10-1000 O: 1-200 F: 1-1 Na: 1-1

**MCO-IV-154**

S/N: UH193

MCO-IV-154\_120612\_001 69 (1.287) AM (Cen,4, 80.00, Ar,8000.0,556.28,0.70); Sm (SG, 2x1.00); Cm (60:70)

06-Dec-2012

16:57:28

TOF MS ES+

6.36e+003

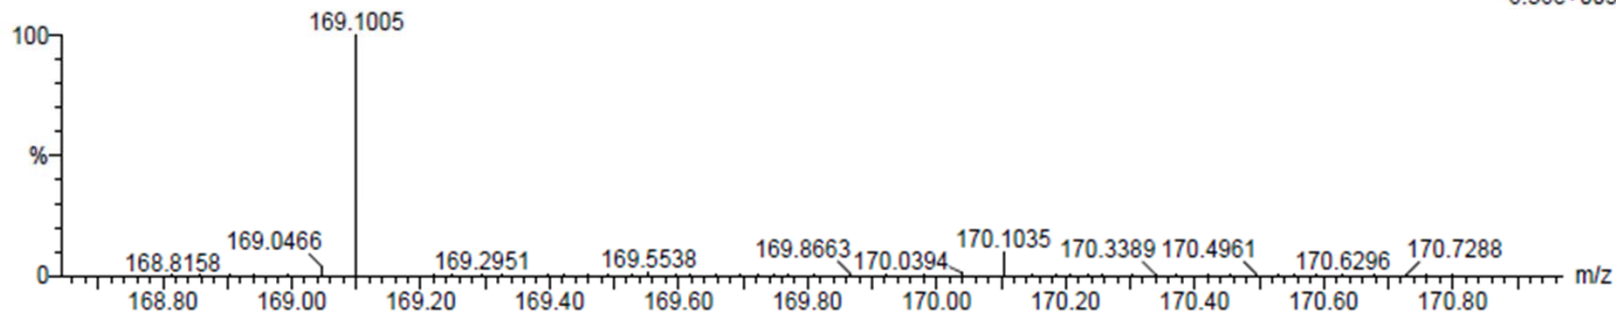

Minimum: -0.5  
Maximum: 5.0 5.0 25.0

| Mass            | Calc. Mass      | mDa        | PPM        | DBE        | i-FIT      | Formula              |
|-----------------|-----------------|------------|------------|------------|------------|----------------------|
| <b>169.1005</b> | <b>169.1005</b> | <b>0.0</b> | <b>0.0</b> | <b>0.5</b> | <b>1.1</b> | <b>C8 H15 O F Na</b> |

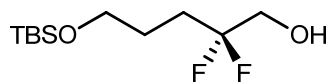

5-((*tert*-butyldimethylsilyl)oxy)-2,2-difluoropentan-1-ol

Solvent: CDCl<sub>3</sub>

400.13 MHz

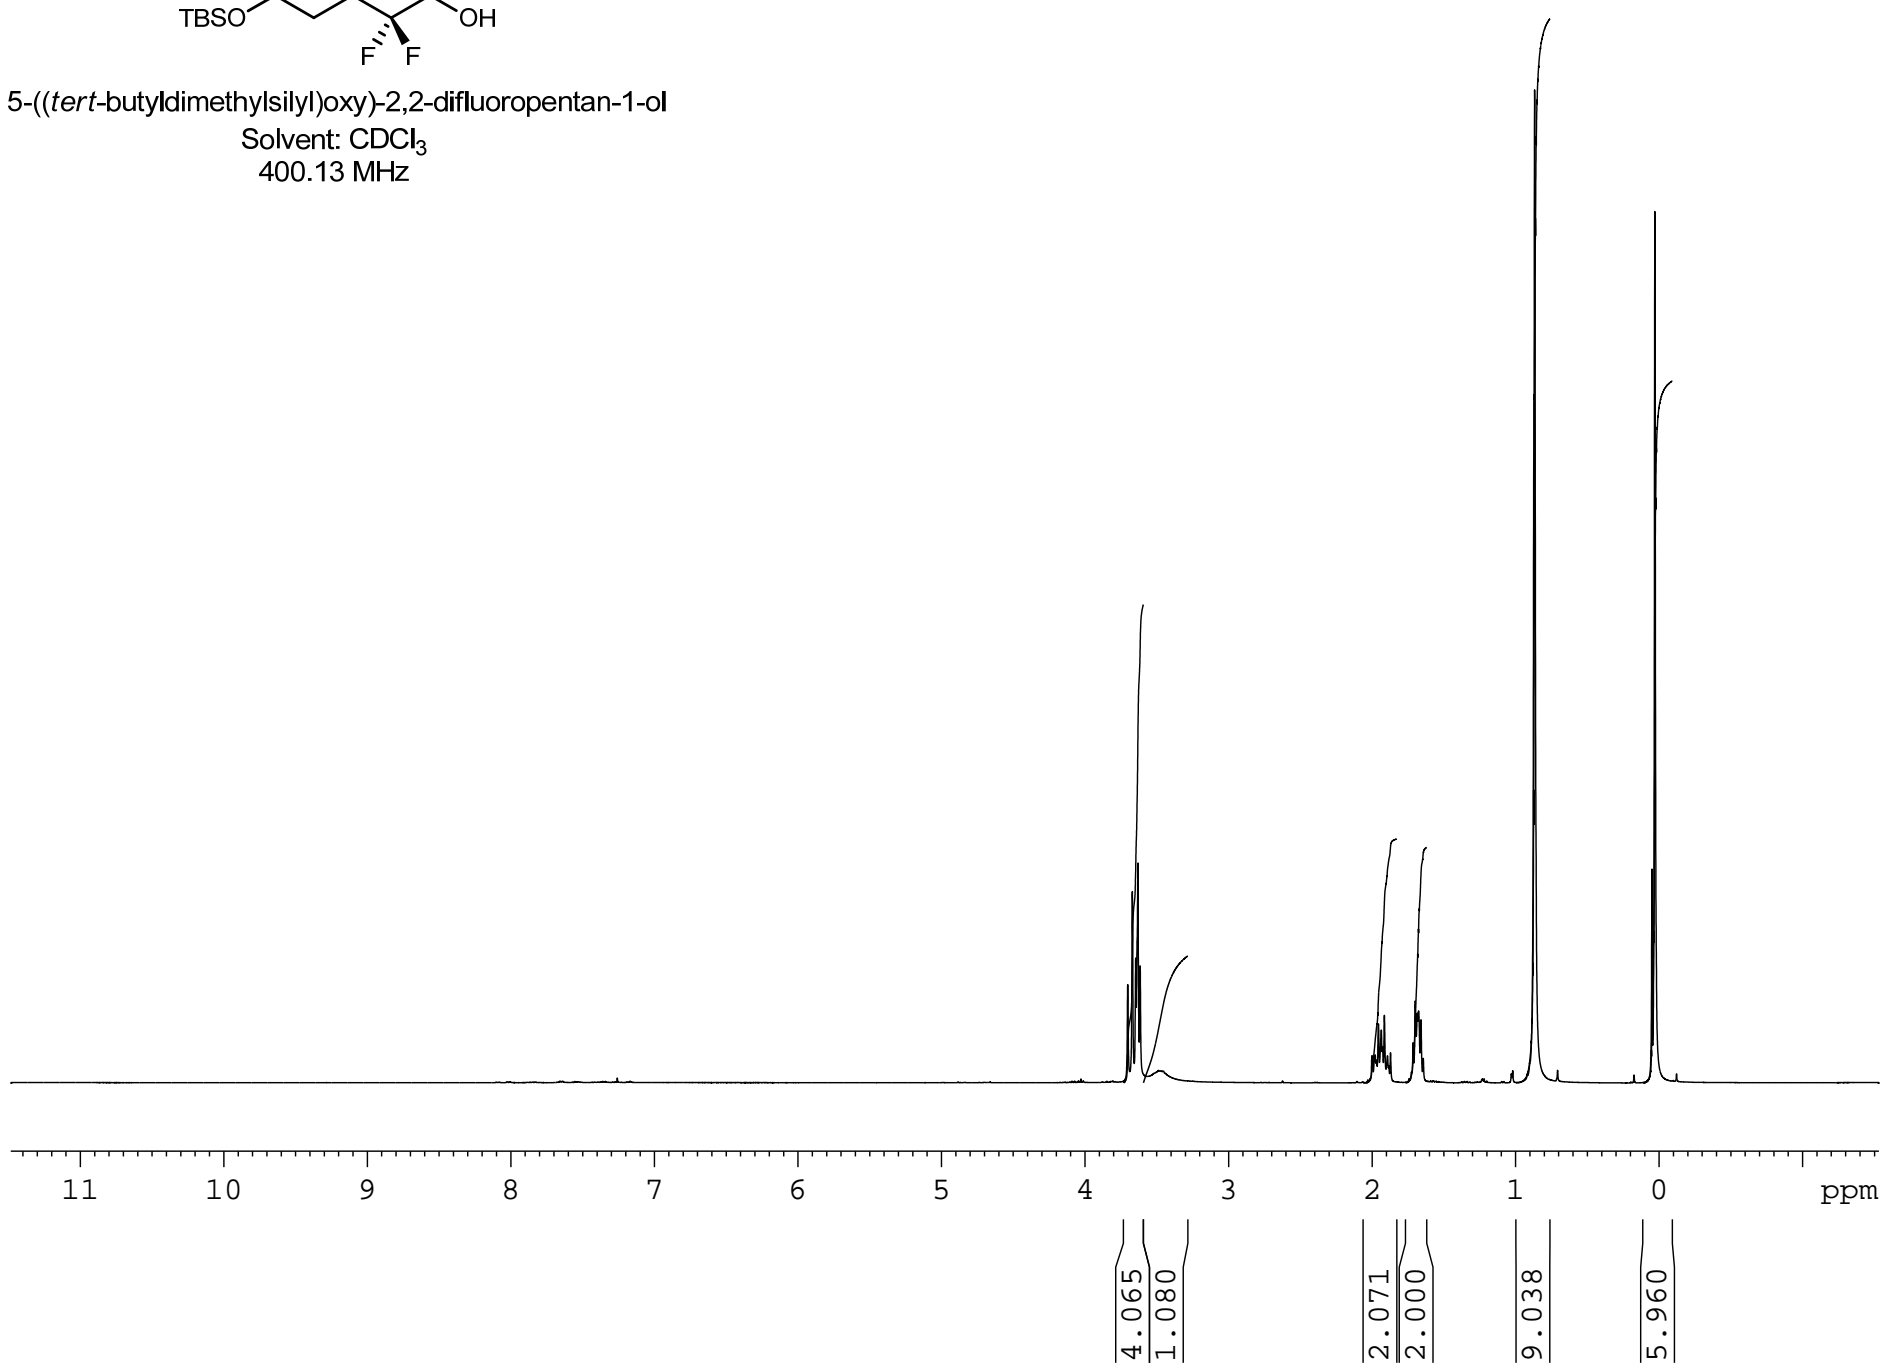

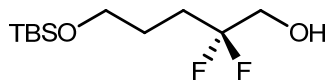

5-((*tert*-butyldimethylsilyl)oxy)-2,2-difluoropentan-1-ol

Solvent: CDCl<sub>3</sub>  
100.6 MHz

125.922  
123.520  
121.119

64.171  
63.853  
63.537  
62.592

30.134  
29.892  
29.652  
25.973  
25.178  
25.137  
25.095  
18.386

-5.336

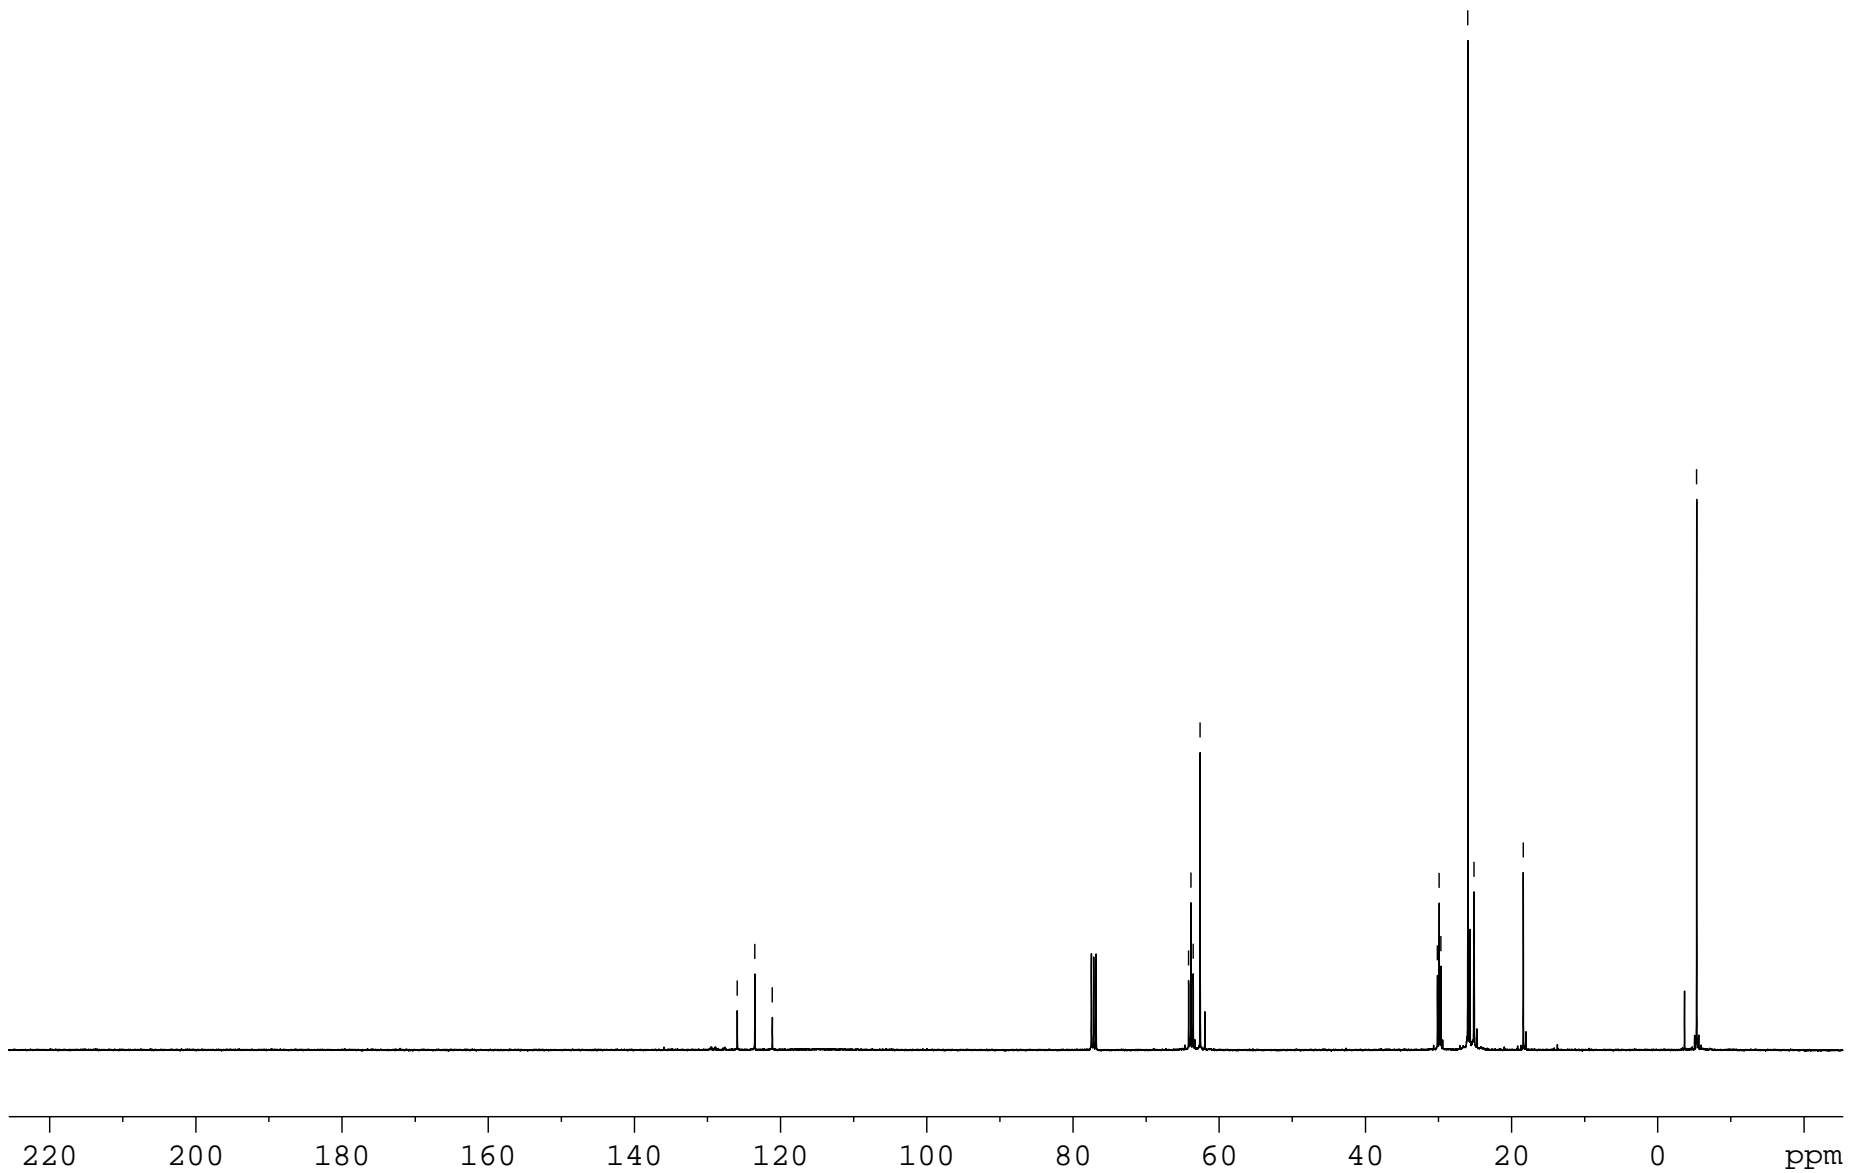



## Elemental Composition Report

Page 1

### Single Mass Analysis

Tolerance = 5.0 PPM / DBE: min = -0.5, max = 25.0

Element prediction: Off

Number of isotope peaks used for i-FIT = 2

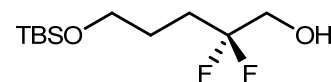

Monoisotopic Mass, Even Electron Ions

13 formula(e) evaluated with 1 results within limits (up to 50 best isotopic matches for each mass)

Elements Used:

C: 10-500 H: 10-1000 O: 1-200 F: 2-2 Si: 1-1

MCO-V-15

S/N: UH193

MCO-V-15\_120712\_001 97 (1.807) AM (Cen,4, 80.00, Ar,8000.0,556.28,0.70); Sm (SG, 2x1.00); Cm (90:100)

07-Dec-2012  
11:50:46  
TOF MS ES+  
9.40e+003

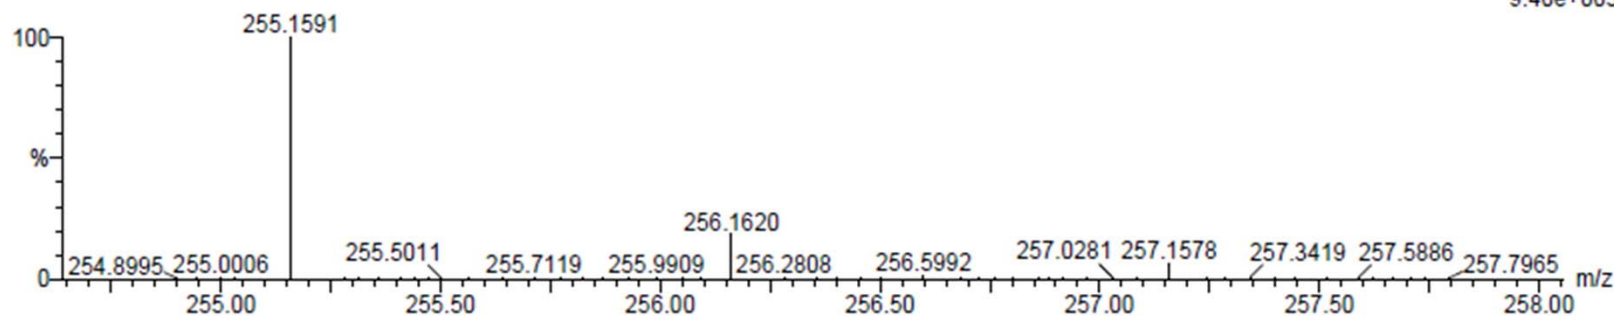

Minimum: -0.5  
Maximum: 5.0 5.0 25.0

| Mass     | Calc. Mass | mDa  | PPM  | DBE  | i-FIT | Formula           |
|----------|------------|------|------|------|-------|-------------------|
| 255.1591 | 255.1592   | -0.1 | -0.4 | -0.5 | 0.8   | C11 H25 O2 F2 Si1 |

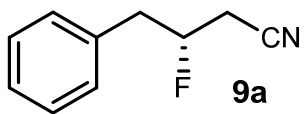

(*R*)-3-fluoro-4-phenylbutanenitrile

Solvent: CDCl<sub>3</sub>

400.13 MHz

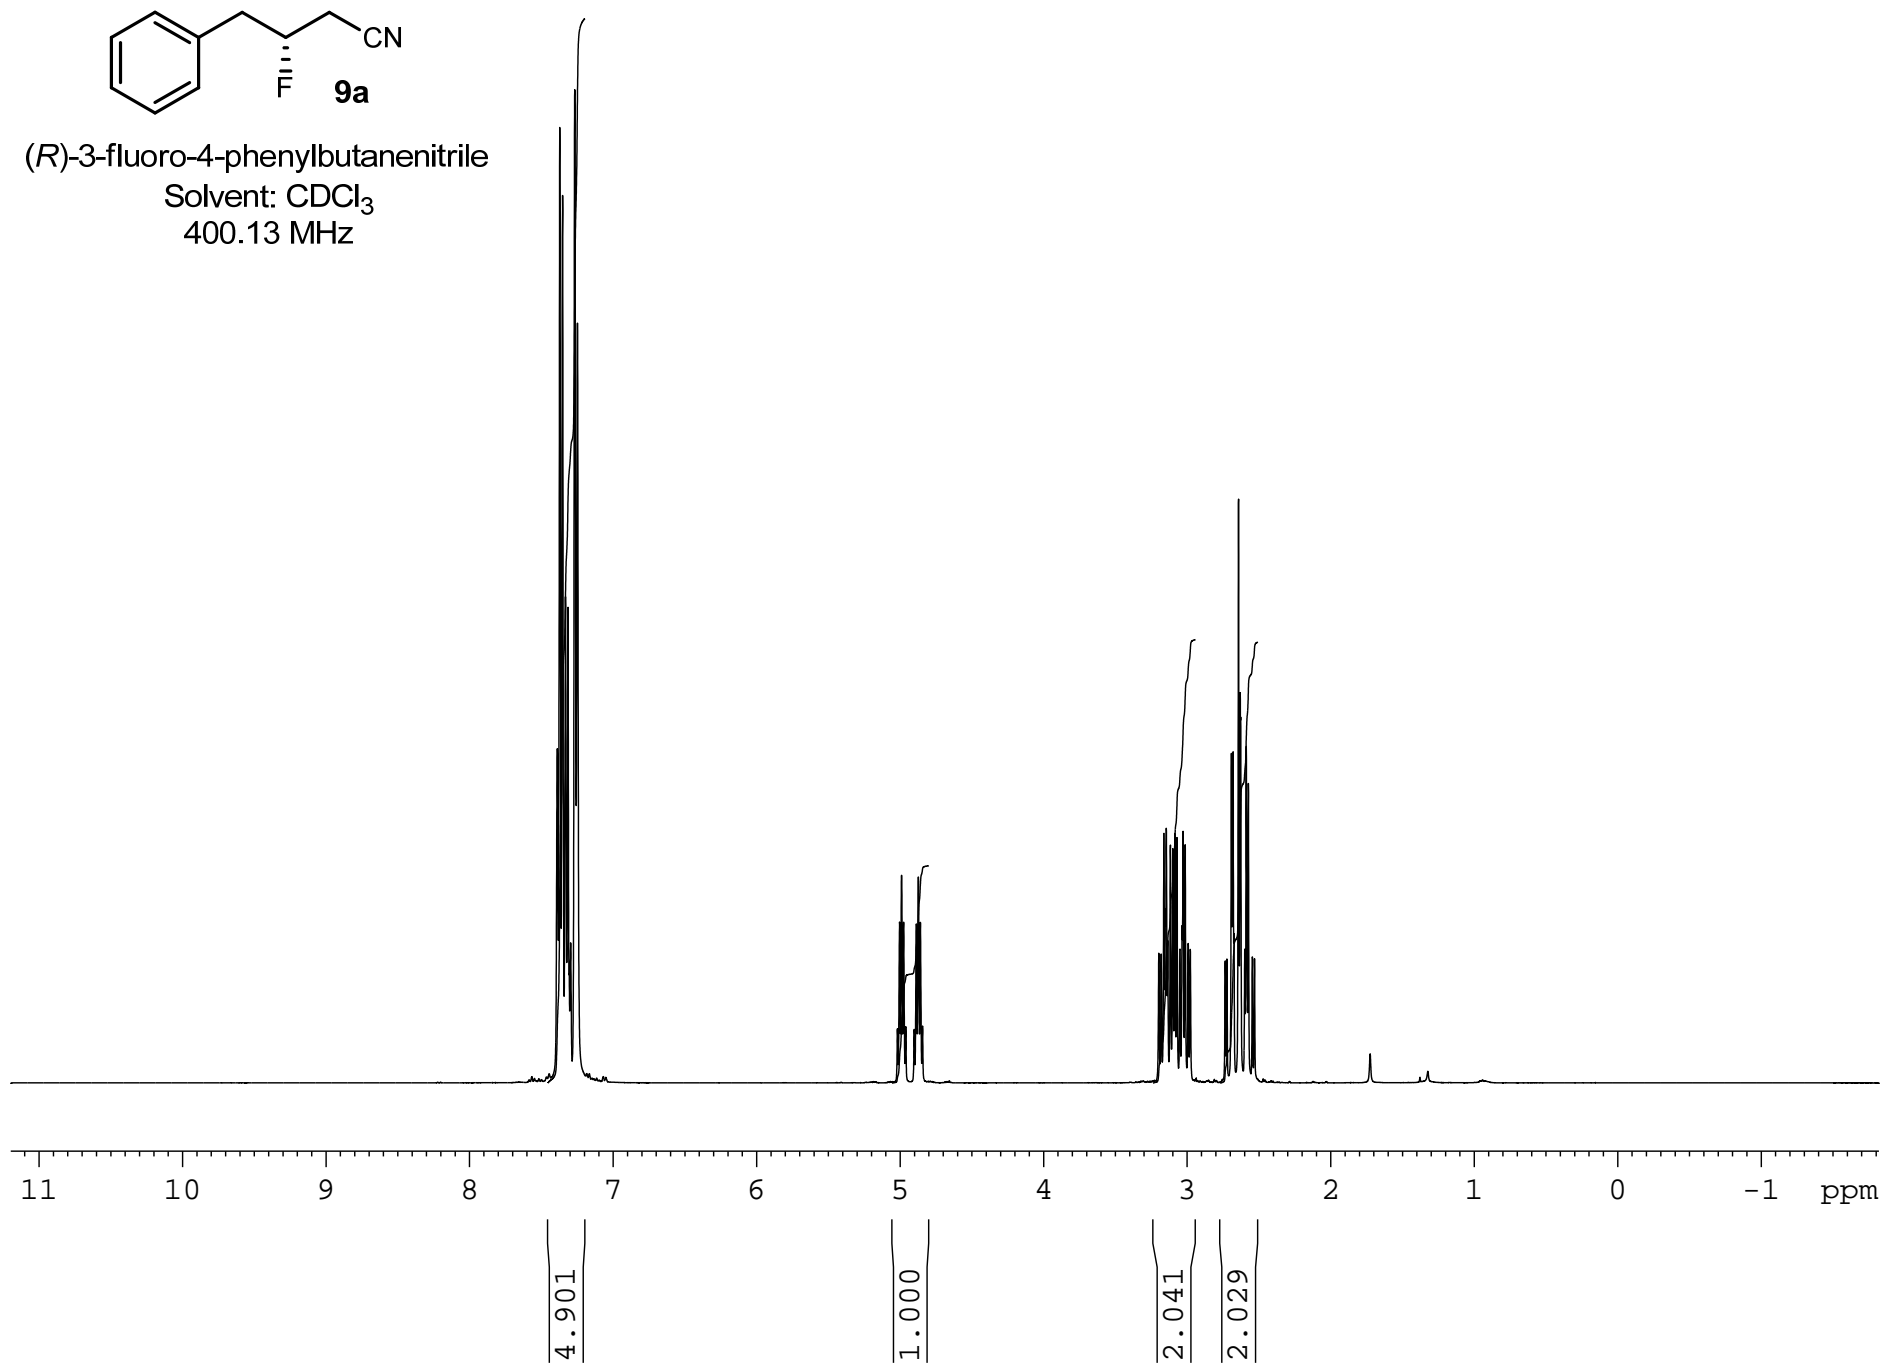

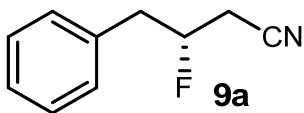

(*R*)-3-fluoro-4-phenylbutanenitrile

Solvent: CDCl<sub>3</sub>

100.6 MHz

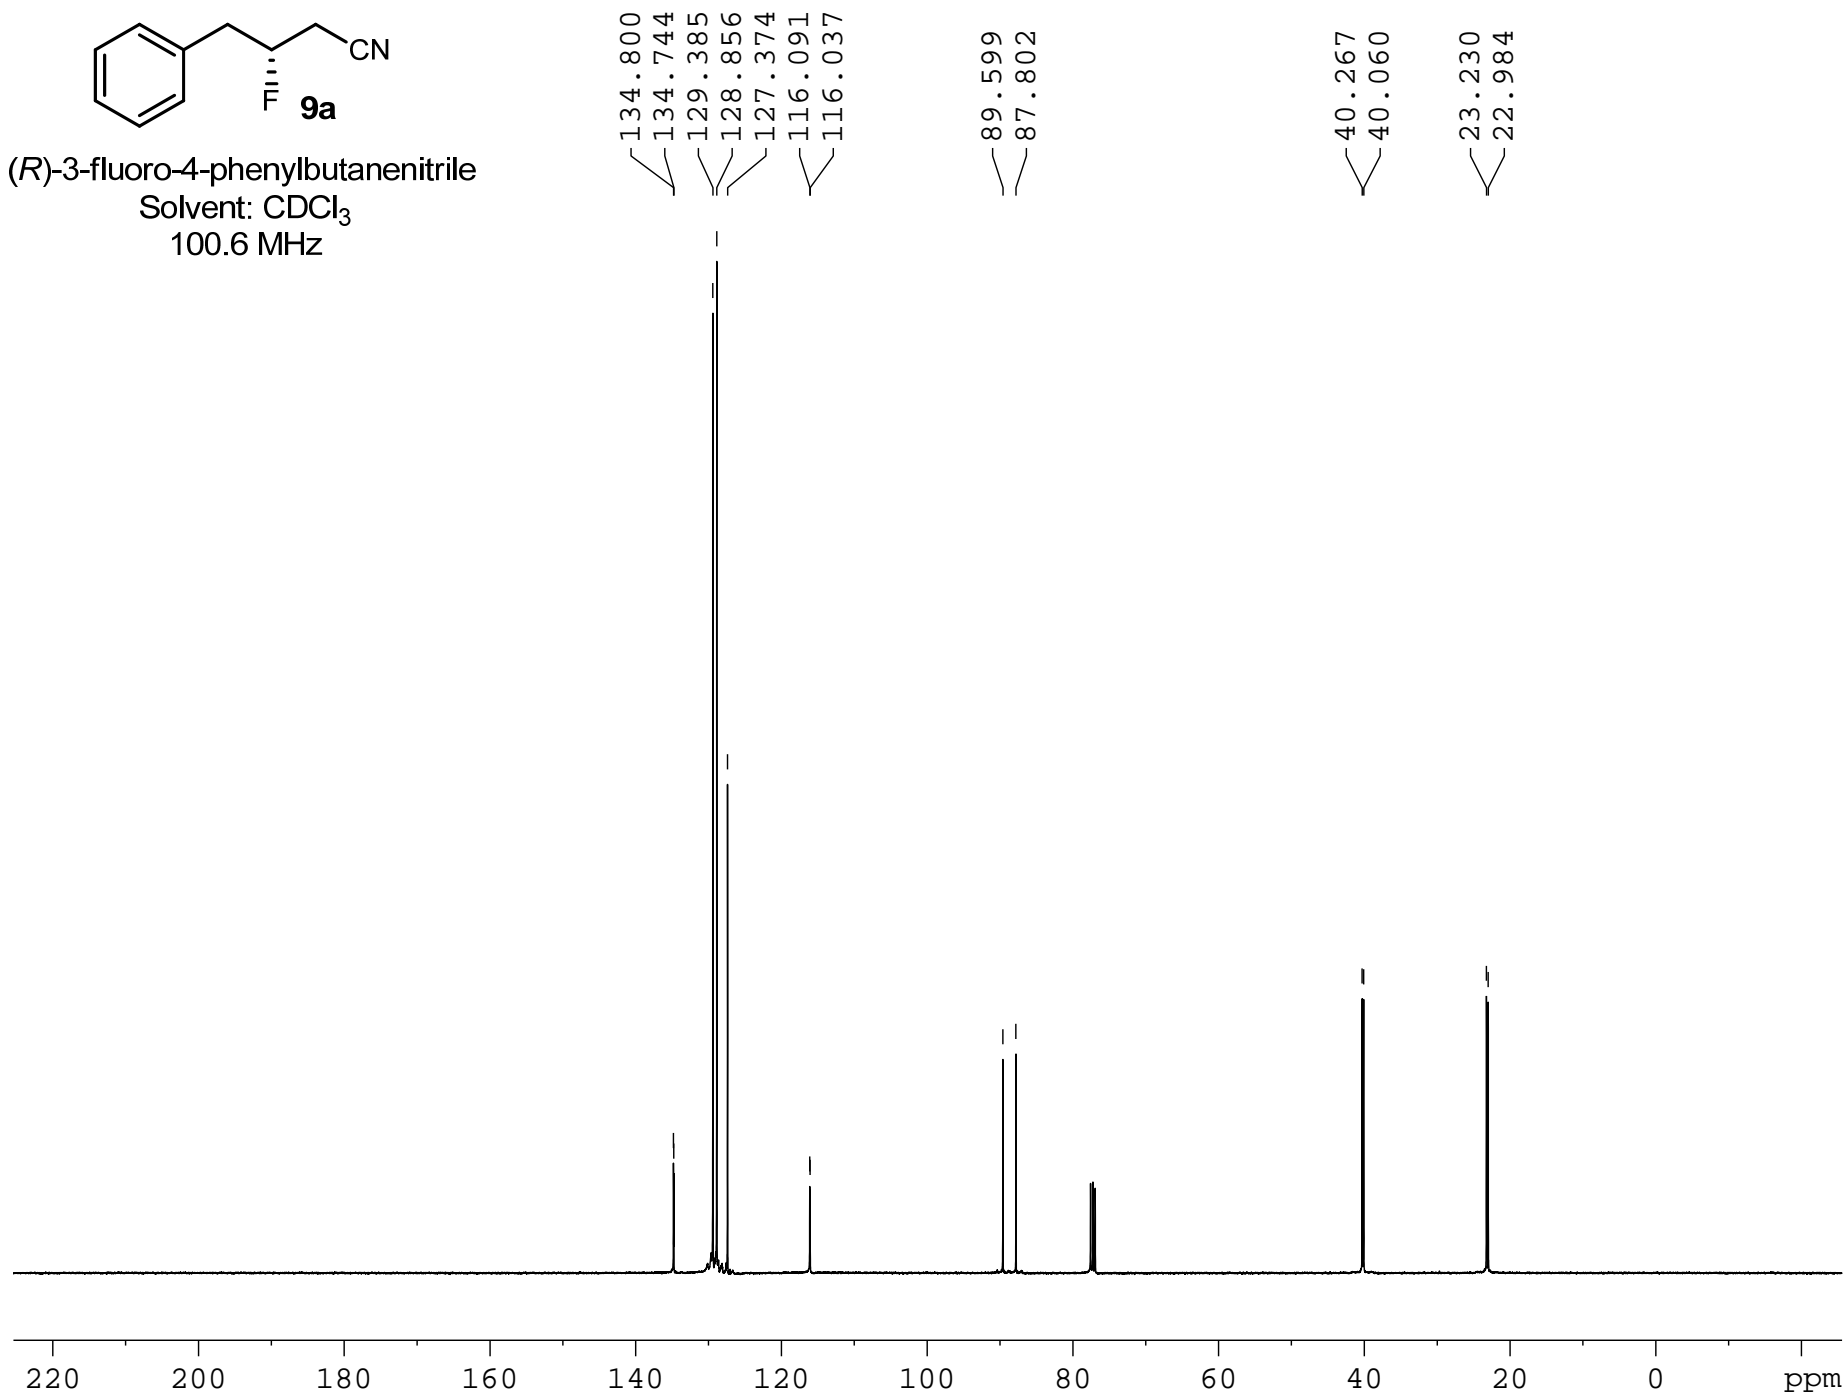

## Elemental Composition Report

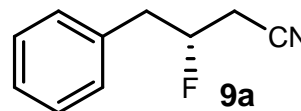

Page 1

### Single Mass Analysis

Tolerance = 5.0 PPM / DBE: min = -0.5, max = 25.0

Element prediction: Off

Number of isotope peaks used for i-FIT = 2

Monoisotopic Mass, Even Electron Ions

9 formula(e) evaluated with 1 results within limits (up to 50 best isotopic matches for each mass)

Elements Used:

C: 10-500 H: 10-1000 N: 1-200 F: 1-1 Na: 1-1

MCO-IV-155

S/N: UH193

MCO-IV-155\_120612\_001 87 (1.621) AM (Cen,4, 80.00, Ar,8000.0,556.28,0.70); Sm (SG, 2x1.00); Cm (80:90)

06-Dec-2012

17:11:33

TOF MS ES+

2.11e+03

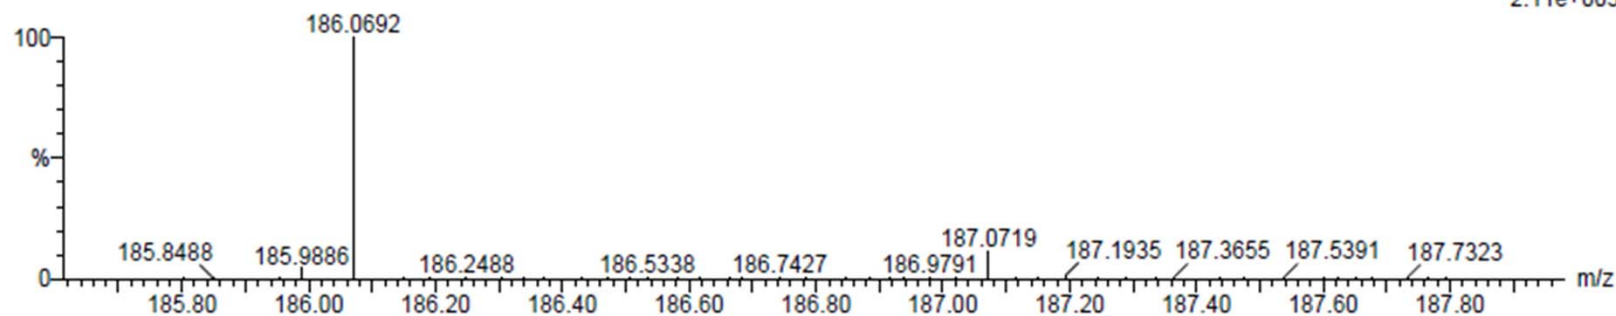

Minimum: -0.5  
Maximum: 5.0 5.0 25.0

| Mass     | Calc. Mass | mDa  | PPM  | DBE | i-FIT | Formula        |
|----------|------------|------|------|-----|-------|----------------|
| 186.0692 | 186.0695   | -0.3 | -1.6 | 5.5 | 0.0   | C10 H10 N F Na |

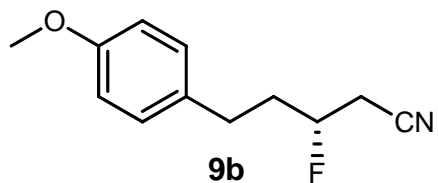

(*R*)-3-fluoro-5-(4-methoxyphenyl)pentanenitrile  
Solvent: CDCl<sub>3</sub>  
400.13 MHz

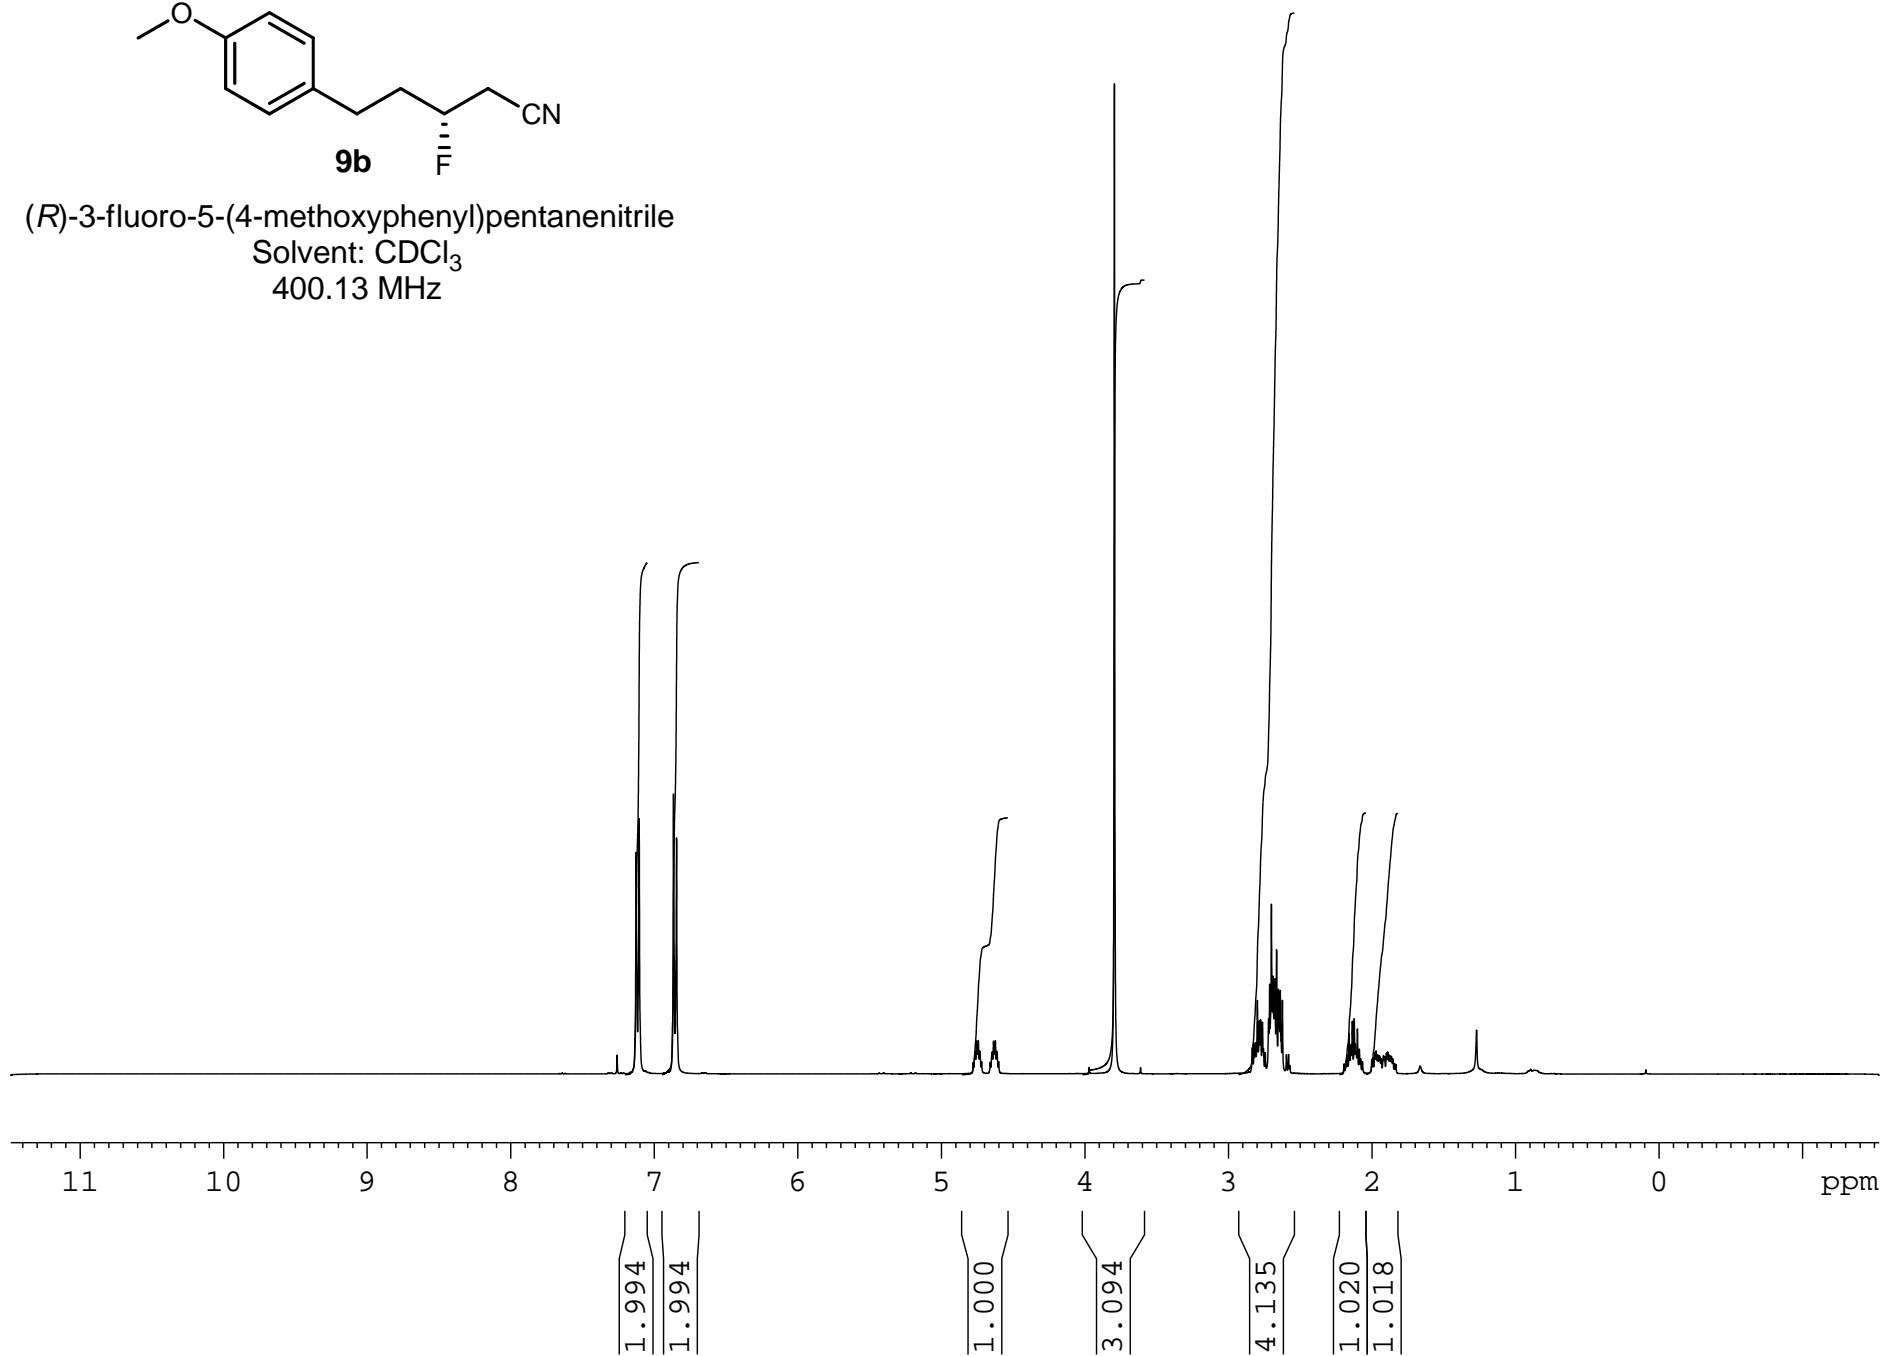

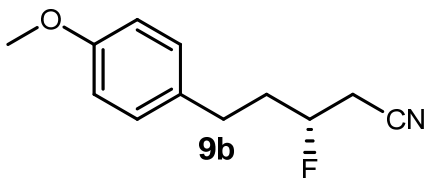

(*R*)-3-fluoro-5-(4-methoxyphenyl)pentanenitrile

Solvent: CDCl<sub>3</sub>  
100.6 MHz

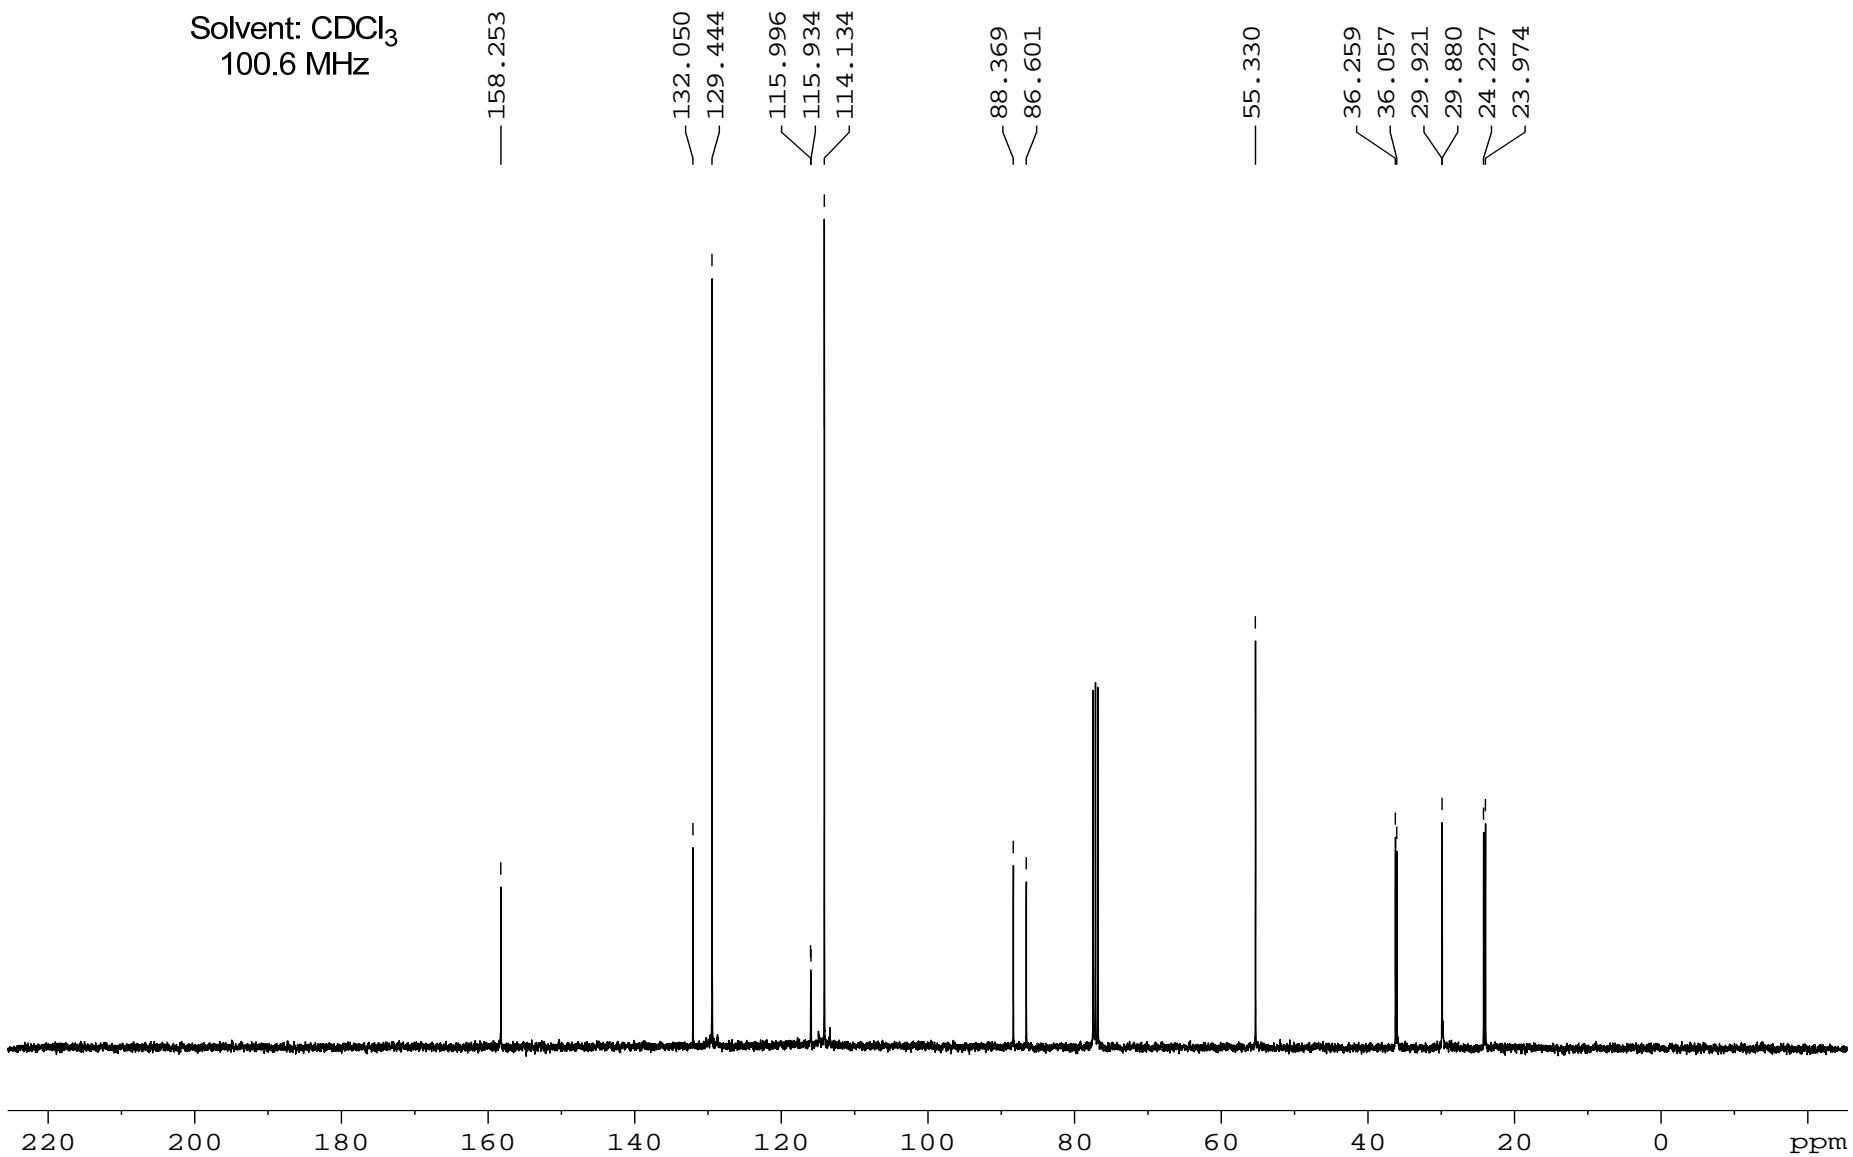

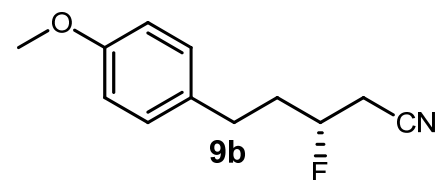

## Elemental Composition Report

### Single Mass Analysis

Tolerance = 5.0 PPM / DBE: min = -0.5, max = 25.0

Element prediction: Off

Number of isotope peaks used for i-FIT = 2

Monoisotopic Mass, Even Electron Ions

155 formula(e) evaluated with 1 results within limits (up to 50 best isotopic matches for each mass)

Elements Used:

C: 10-500 H: 10-1000 N: 1-200 O: 1-200 F: 1-1 Na: 0-1

MCO-IV-150

S/N: UH193

MCO-IV-150\_120612\_001 60 (1.121) AM (Cen,4, 80.00, Ar,8000.0,556.28,0.70); Sm (SG, 2x1.00); Cm (50:60)

06-Dec-2012  
14:26:21  
TOF MS ES+  
3.20e+003

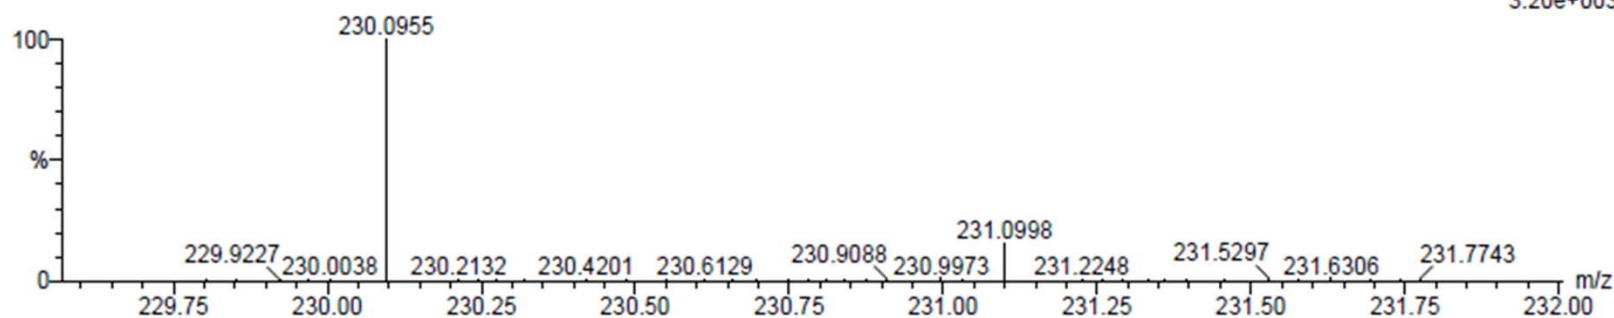

Minimum: -0.5  
Maximum: 5.0 5.0 25.0

| Mass     | Calc. Mass | mDa  | PPM  | DBE | i-FIT | Formula          |
|----------|------------|------|------|-----|-------|------------------|
| 230.0955 | 230.0957   | -0.2 | -0.9 | 5.5 | 2.9   | C12 H14 N O F Na |

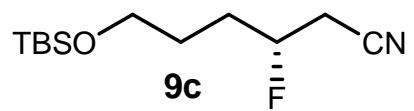

(*R*)-6-((*tert*-butyldimethylsilyl)oxy)-3-fluorohexanenitrile

Solvent: CDCl<sub>3</sub>

400.13 MHz

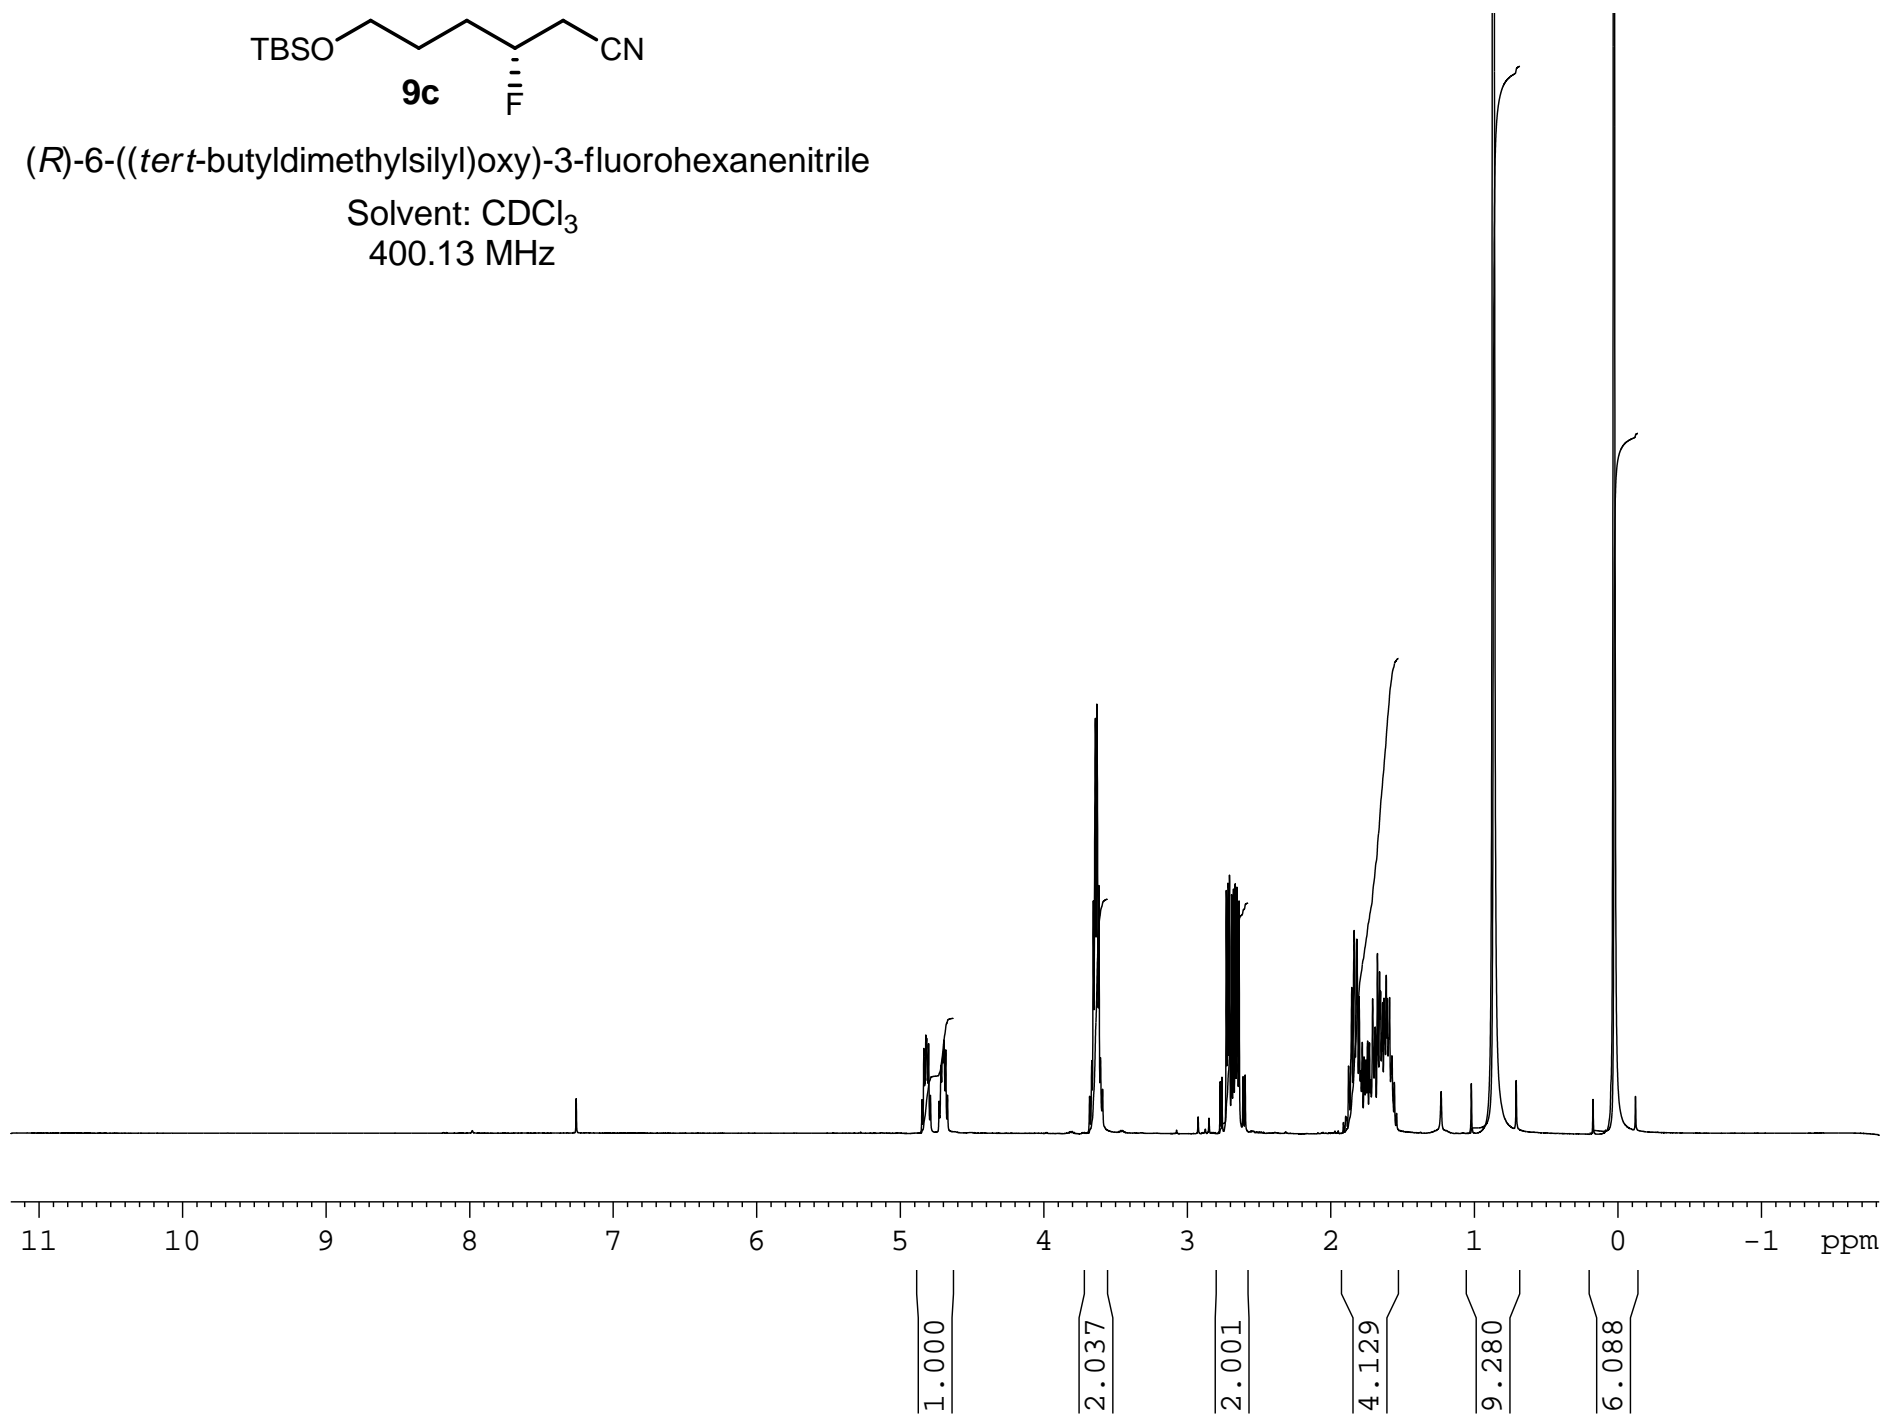



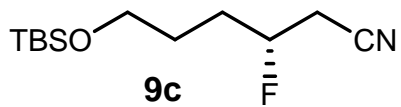

(*R*)-6-((*tert*-butyldimethylsilyl)oxy)-3-fluorohexanenitrile

Solvent: CDCl<sub>3</sub>

100.6 MHz

116.061  
116.003

89.396  
87.633

62.240

31.206  
31.003  
27.867  
27.824  
25.941  
24.210  
23.958  
18.300

5.350

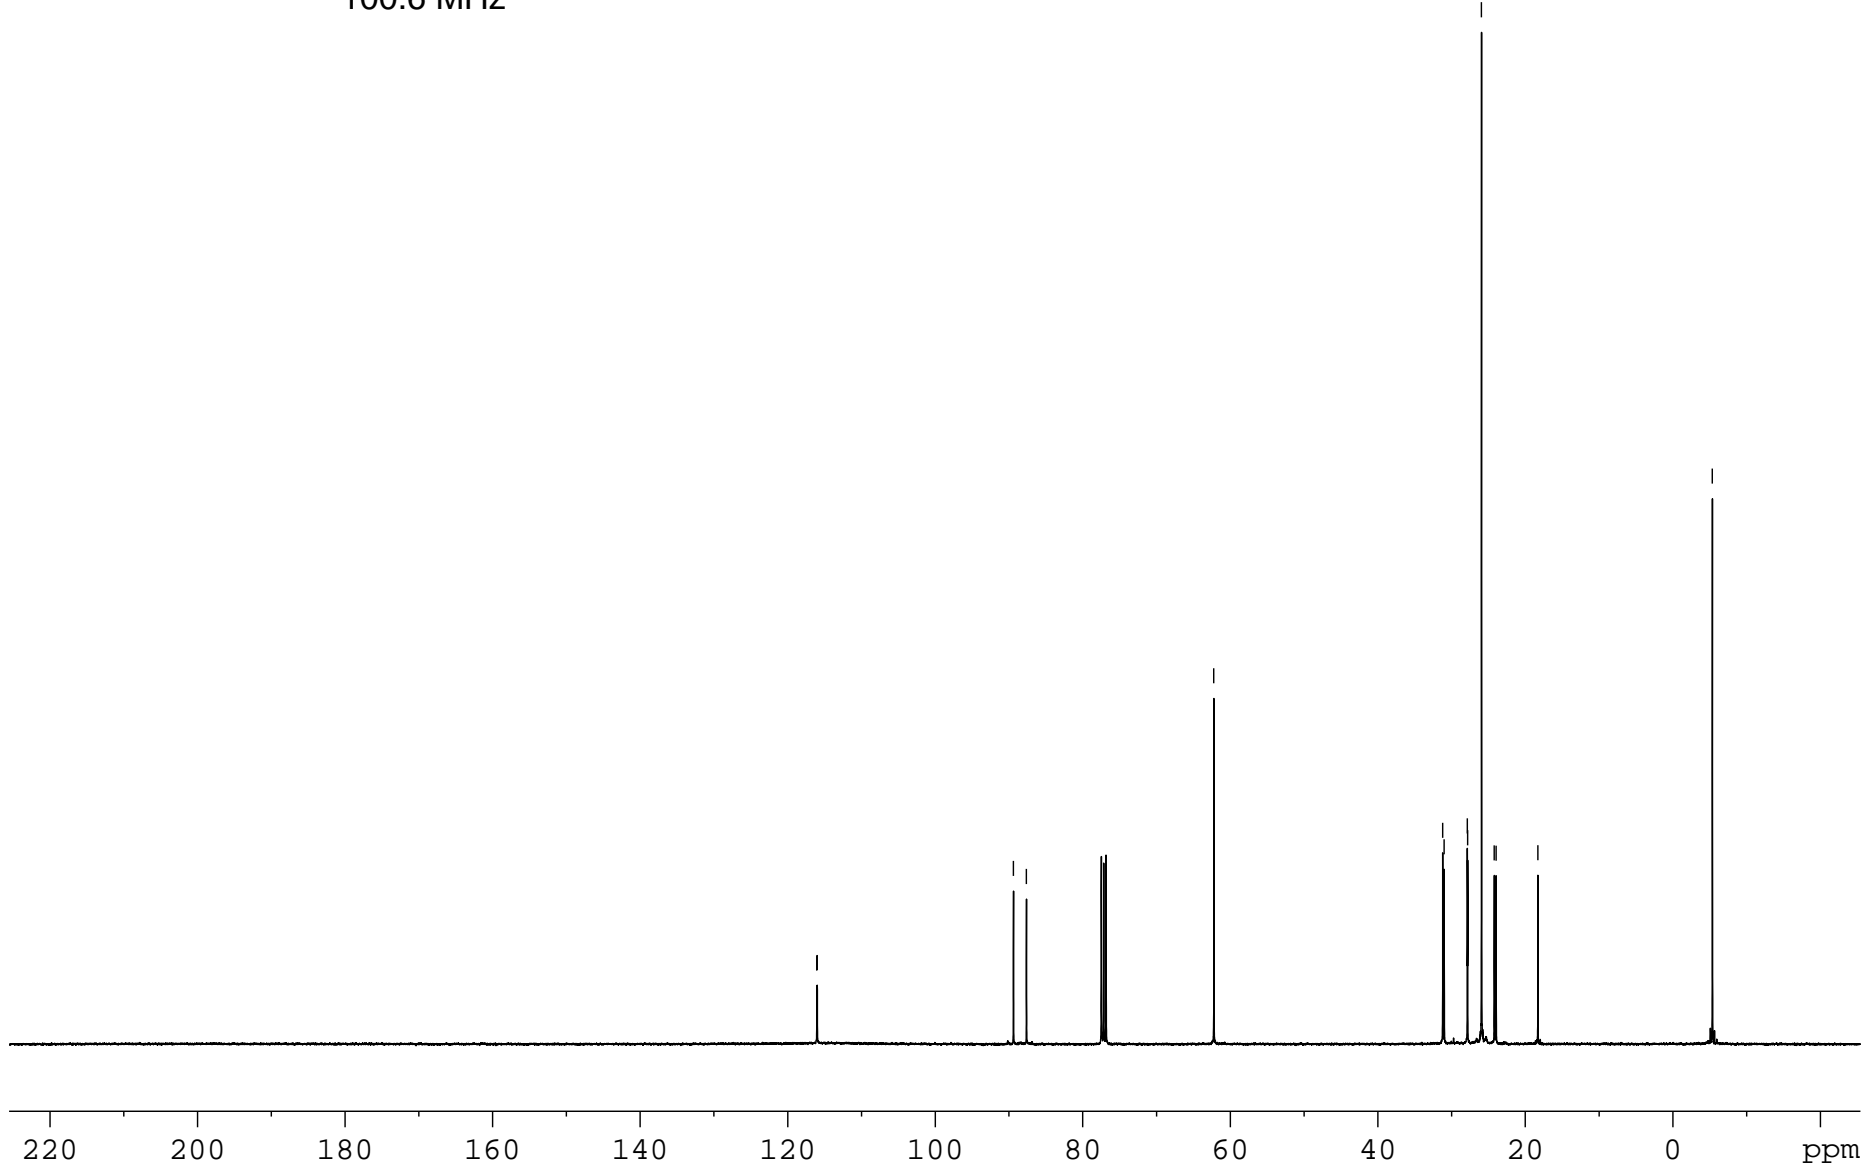

## Elemental Composition Report

### Single Mass Analysis

Tolerance = 5.0 PPM / DBE: min = -0.5, max = 25.0

Element prediction: Off

Number of isotope peaks used for i-FIT = 2

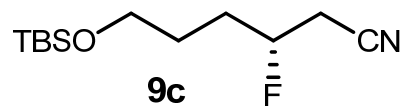

Page 1

Monoisotopic Mass, Even Electron Ions

76 formula(e) evaluated with 1 results within limits (up to 50 best isotopic matches for each mass)

Elements Used:

C: 10-500 H: 10-1000 N: 1-200 O: 1-200 F: 1-1 Si: 1-1

MCO-IV-171

S/N: UH193

MCO-IV-171\_120712\_001 60 (1.120) AM (Cen,4, 80.00, Ar,8000.0,556.28,0.70); Sm (SG, 2x1.00); Cm (60:70)

07-Dec-2012  
10:58:05  
TOF MS ES+  
6.09e+003

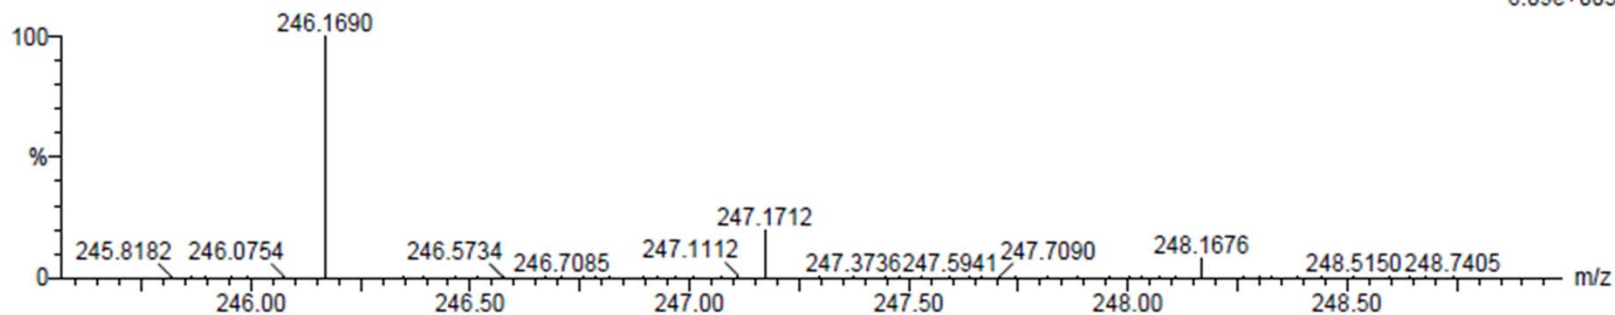

Minimum: -0.5  
Maximum: 5.0 5.0 25.0

| Mass     | Calc. Mass | mDa | PPM | DBE | i-FIT | Formula          |
|----------|------------|-----|-----|-----|-------|------------------|
| 246.1690 | 246.1689   | 0.1 | 0.4 | 1.5 | 0.5   | C12 H25 N O F Si |

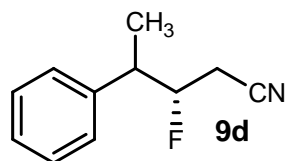

(3S)-3-fluoro-4-phenylpentanenitrile  
Diastereomer A  
Solvent: CDCl<sub>3</sub>  
400.13 MHz

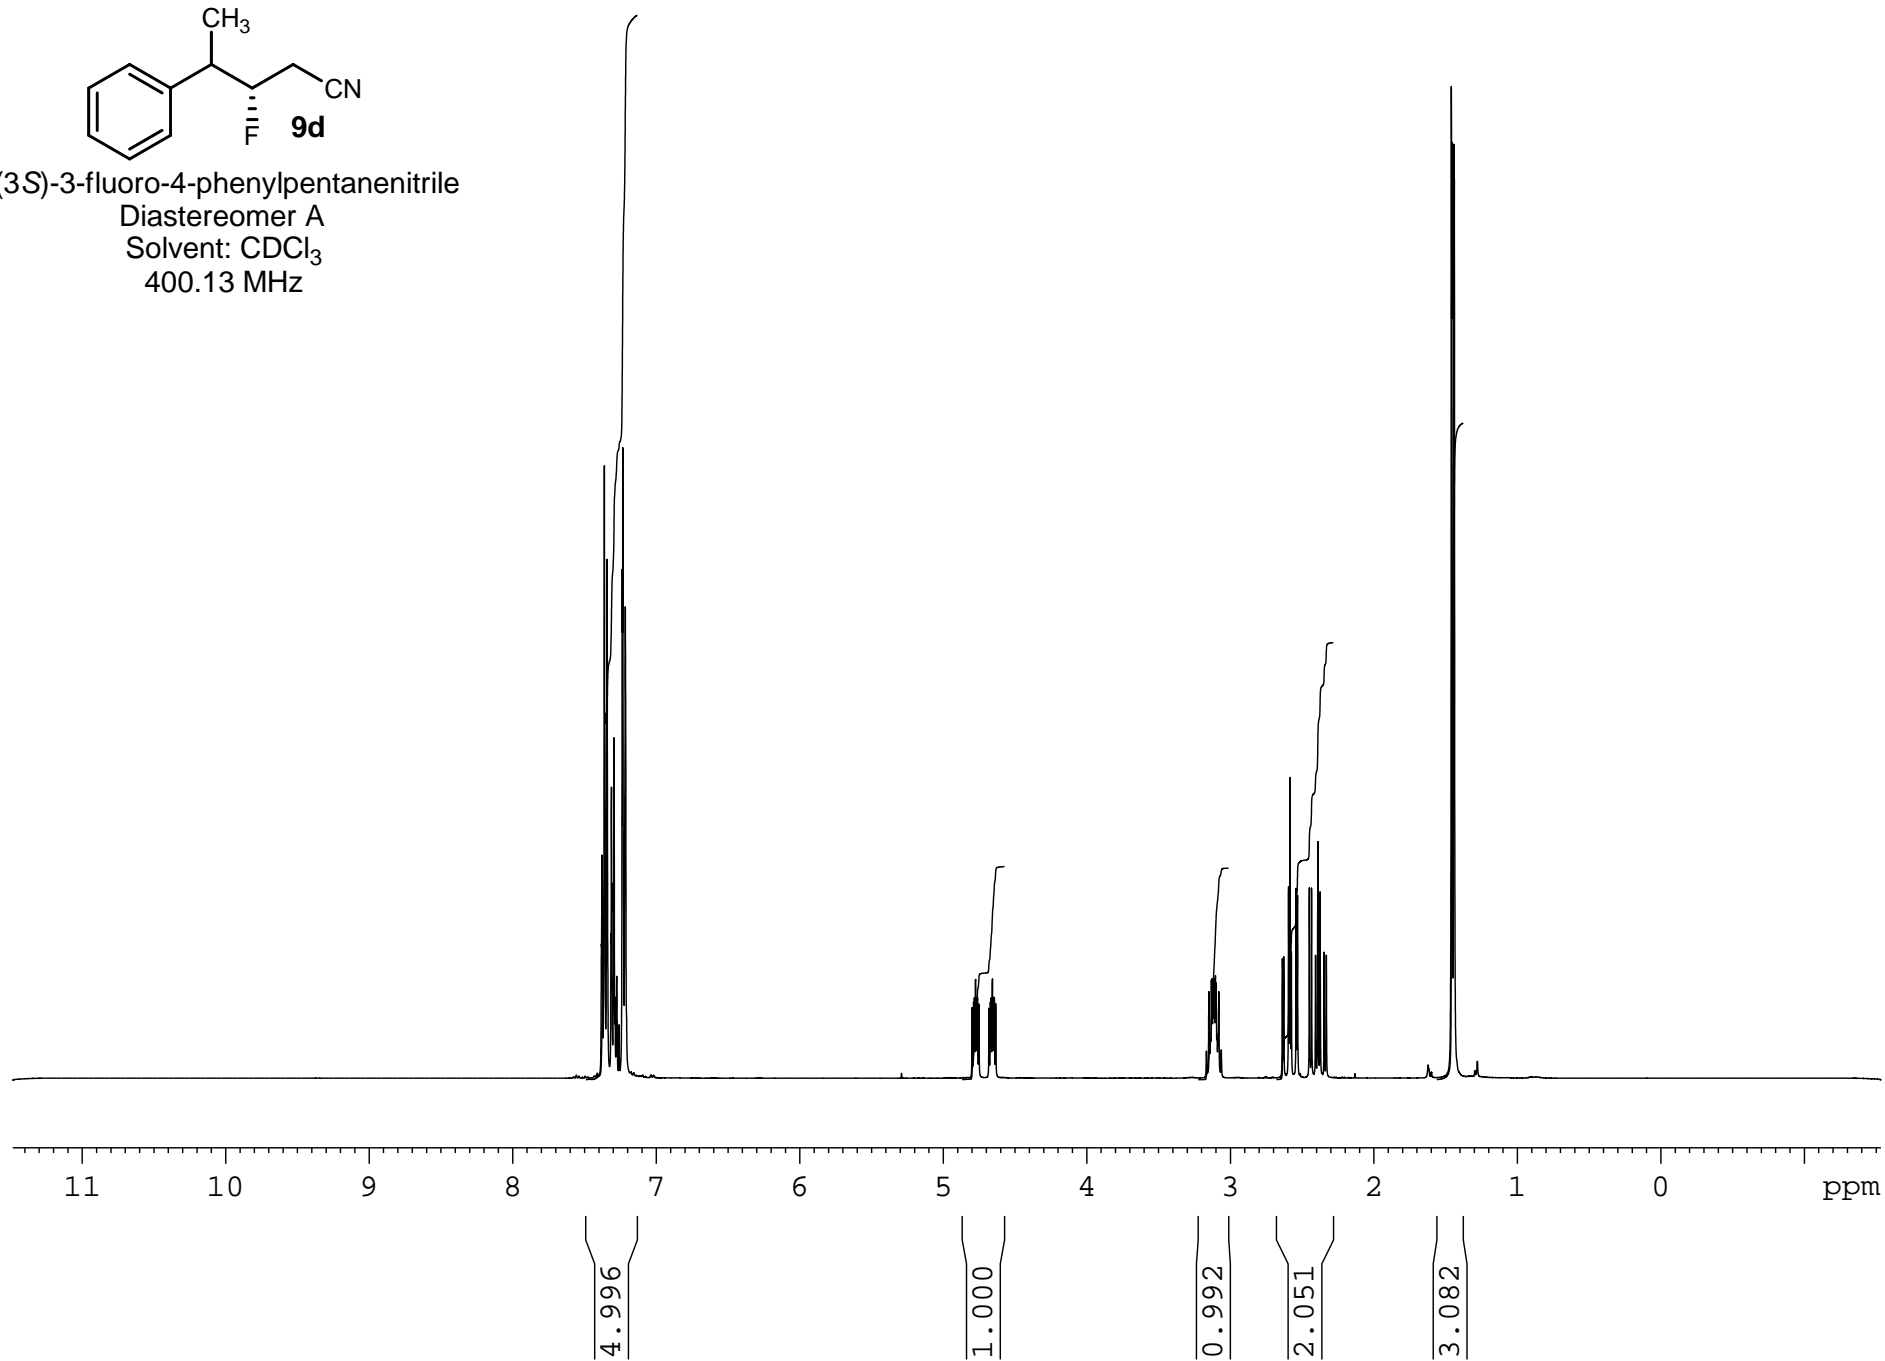

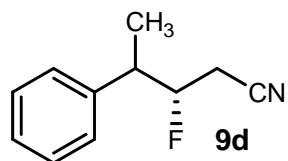

(3S)-3-fluoro-4-phenylpentanenitrile  
Diastereomer A  
Solvent: CDCl<sub>3</sub>  
100.6 MHz

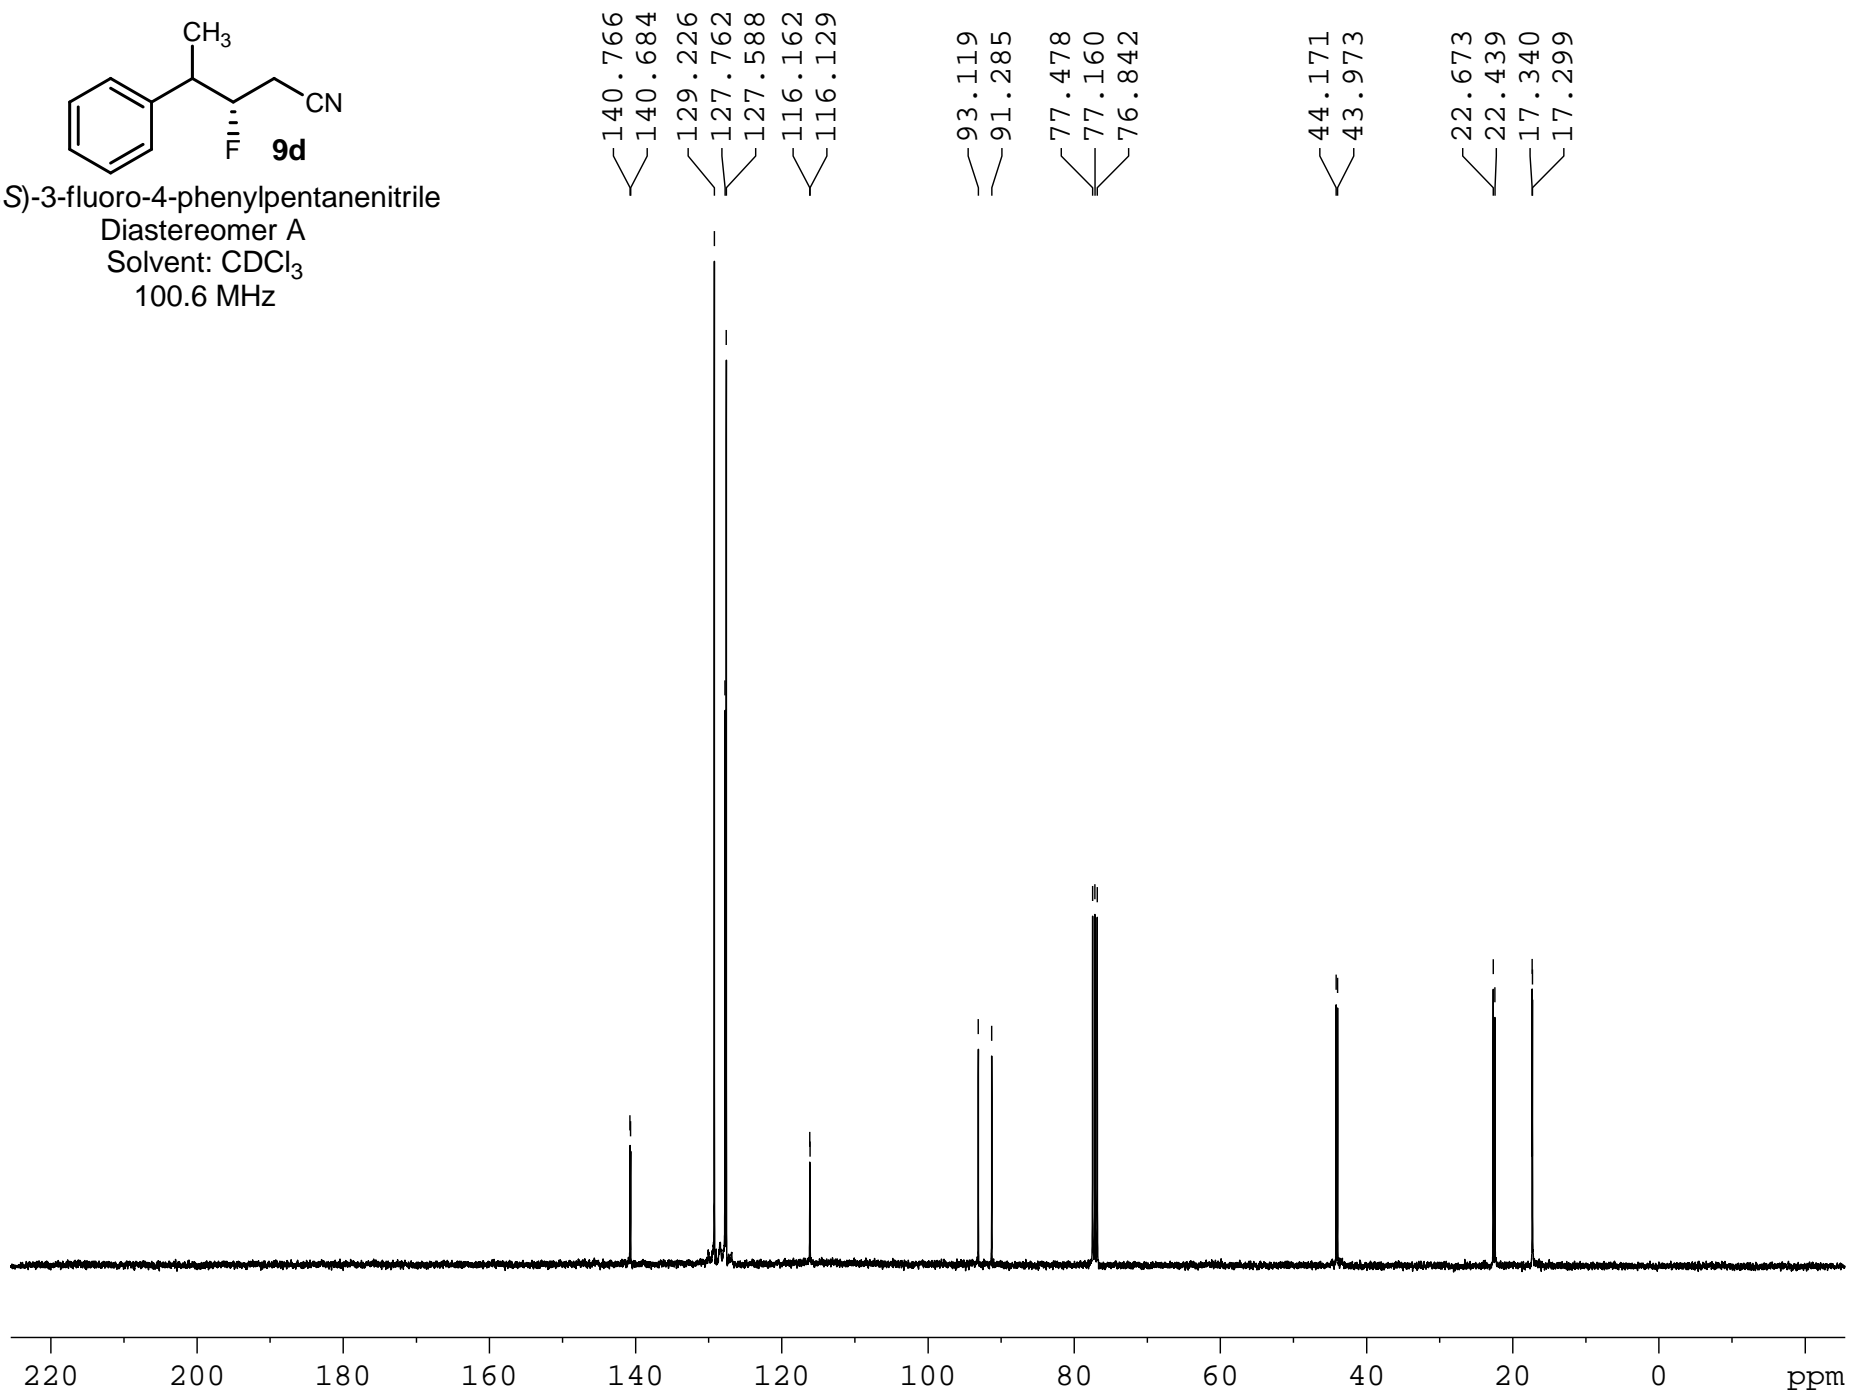

## Elemental Composition Report

### Single Mass Analysis

Tolerance = 5.0 PPM / DBE: min = -0.5, max = 25.0

Element prediction: Off

Number of isotope peaks used for i-FIT = 2

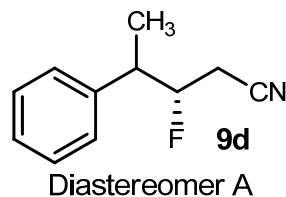

Page 1

Monoisotopic Mass, Even Electron Ions

11 formula(e) evaluated with 1 results within limits (up to 50 best isotopic matches for each mass)

Elements Used:

C: 10-500 H: 10-1000 N: 1-200 F: 1-1

MCO-IV-160

S/N: UH193

MCO-IV-160\_120712\_001 52 (0.972) AM (Cen,4, 80.00, Ar,8000.0,556.28,0.70); Sm (SG, 2x1.00); Cm (50:60)

07-Dec-2012  
09:28:39  
TOF MS ES+  
2.40e+003

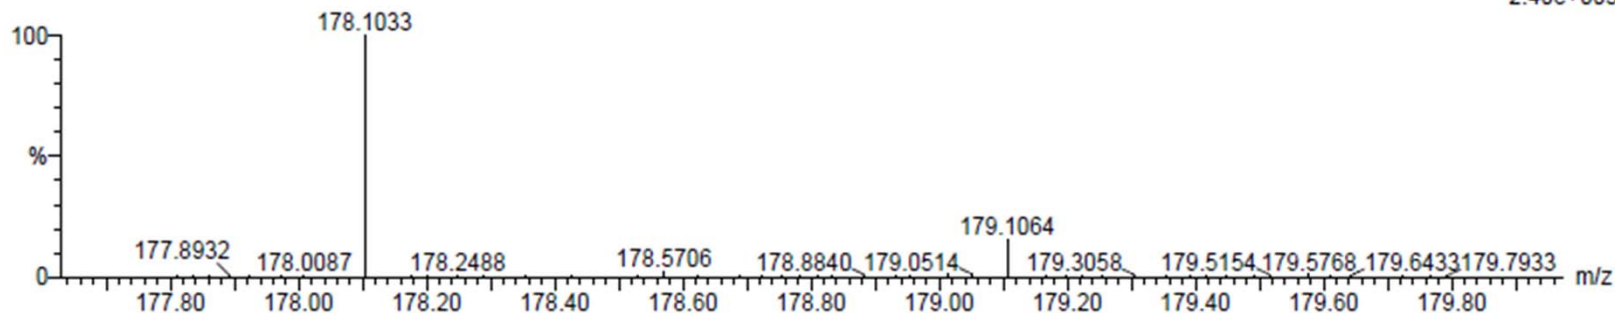

Minimum: -0.5  
Maximum: 5.0 5.0 25.0

| Mass     | Calc. Mass | mDa | PPM | DBE | i-FIT | Formula     |
|----------|------------|-----|-----|-----|-------|-------------|
| 178.1033 | 178.1032   | 0.1 | 0.6 | 5.5 | 3.9   | C11 H13 N F |

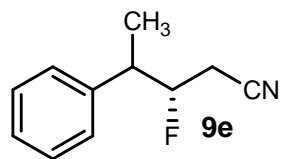

(3S)-3-fluoro-4-phenylpentanenitrile  
Diastereomer B  
Solvent: CDCl<sub>3</sub>  
400.13 MHz

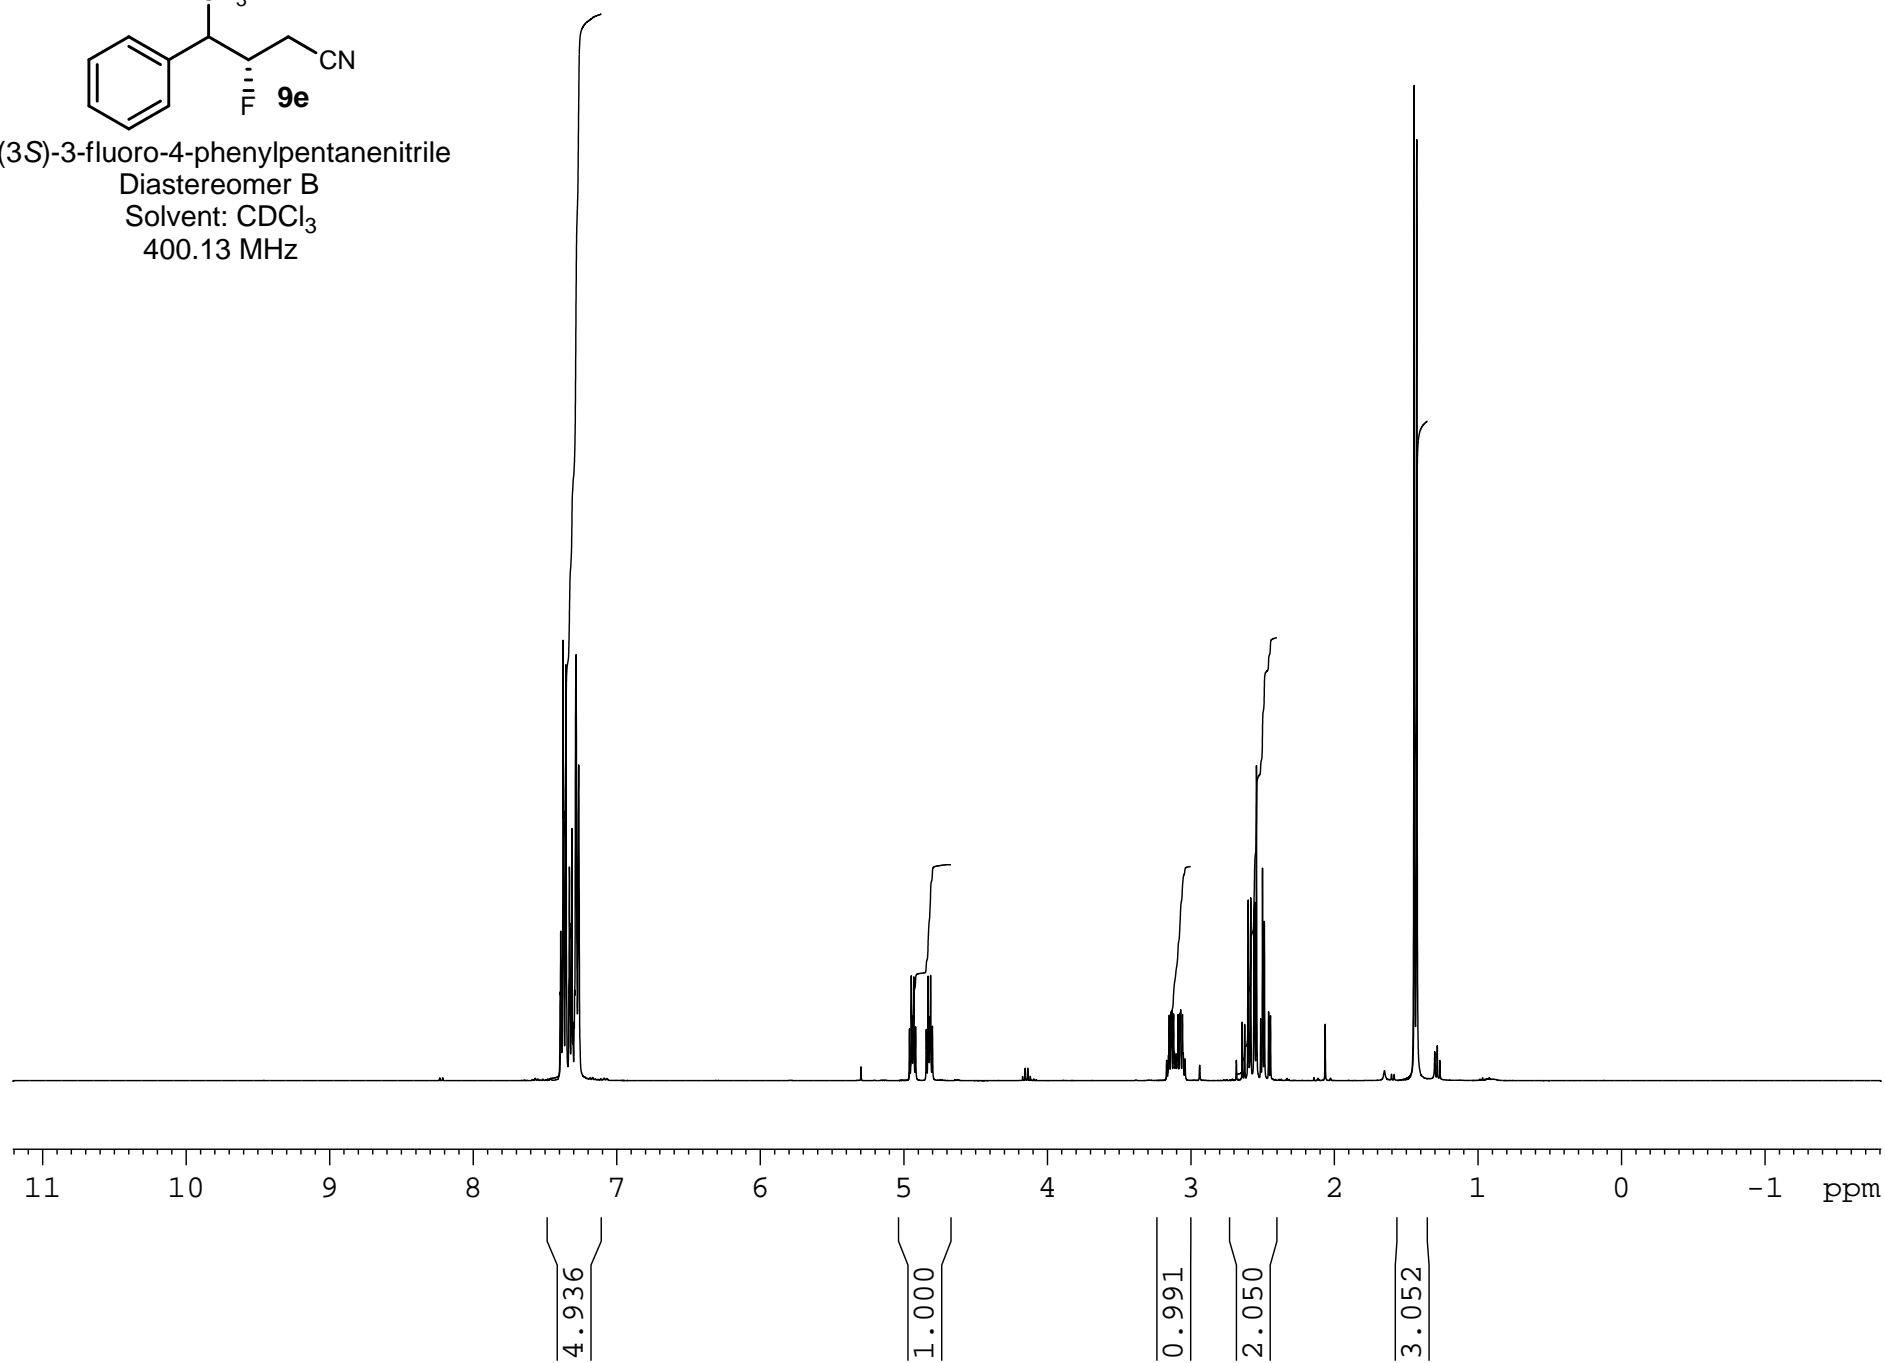

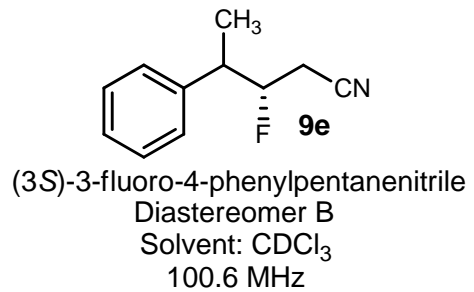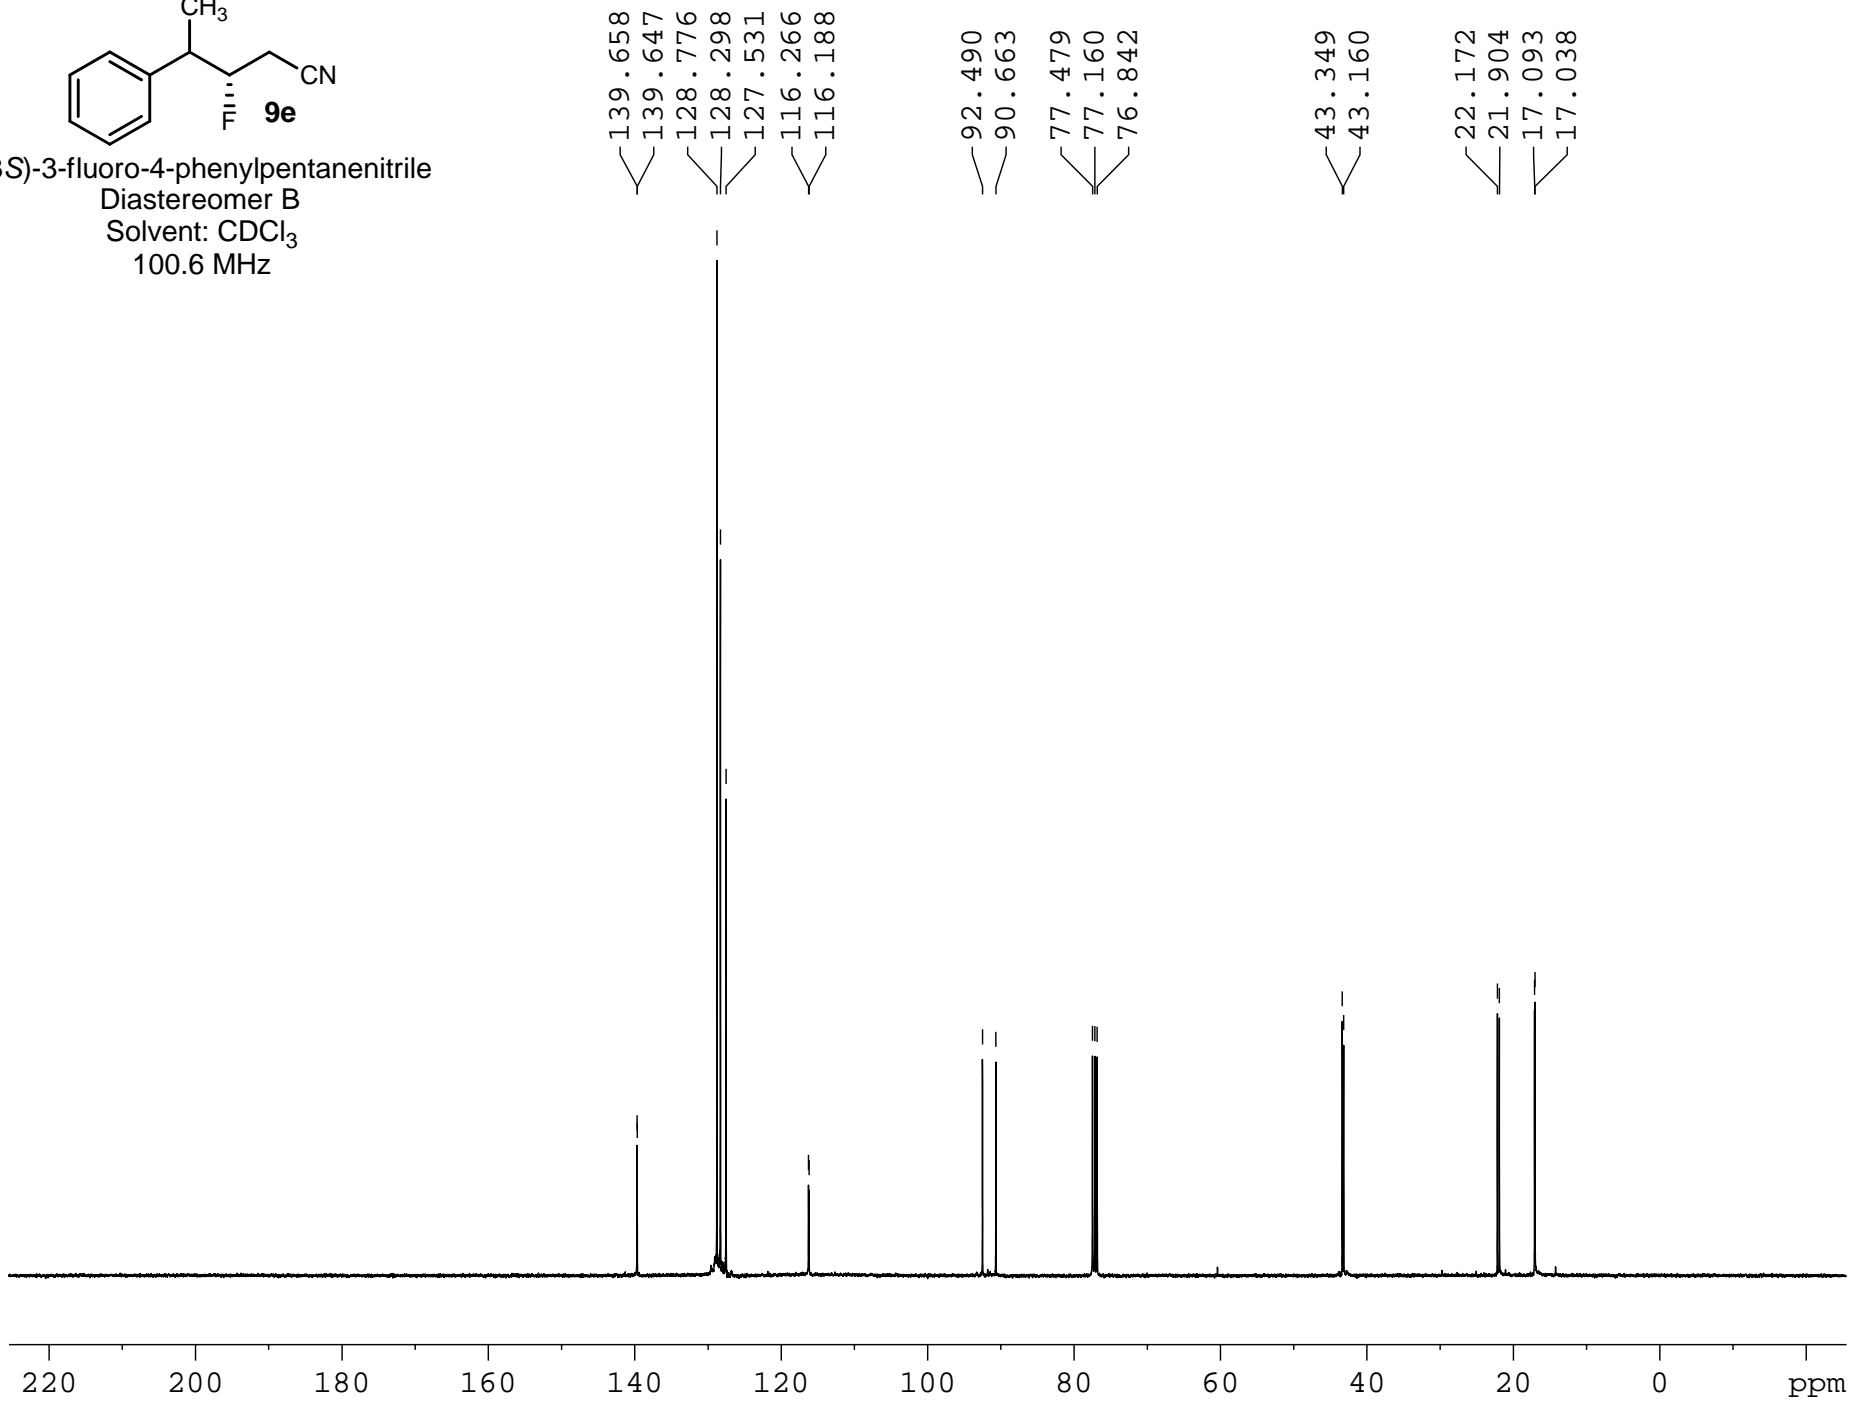

## Elemental Composition Report

### Single Mass Analysis

Tolerance = 5.0 PPM / DBE: min = -0.5, max = 25.0

Element prediction: Off

Number of isotope peaks used for i-FIT = 2

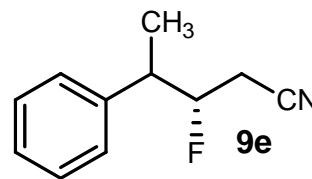

Diastereomer B

Page 1

Monoisotopic Mass, Even Electron Ions

11 formula(e) evaluated with 1 results within limits (up to 50 best isotopic matches for each mass)

Elements Used:

C: 10-500 H: 10-1000 N: 1-200 F: 1-1

MCO-IV-161

S/N: UH193

MCO-IV-161\_120712\_001 80 (1.492) AM (Cen,4, 80.00, Ar,8000.0,556.28,0.70); Sm (SG, 2x1.00); Cm (80:90)

07-Dec-2012  
09:40:43  
TOF MS ES+  
8.15e+002

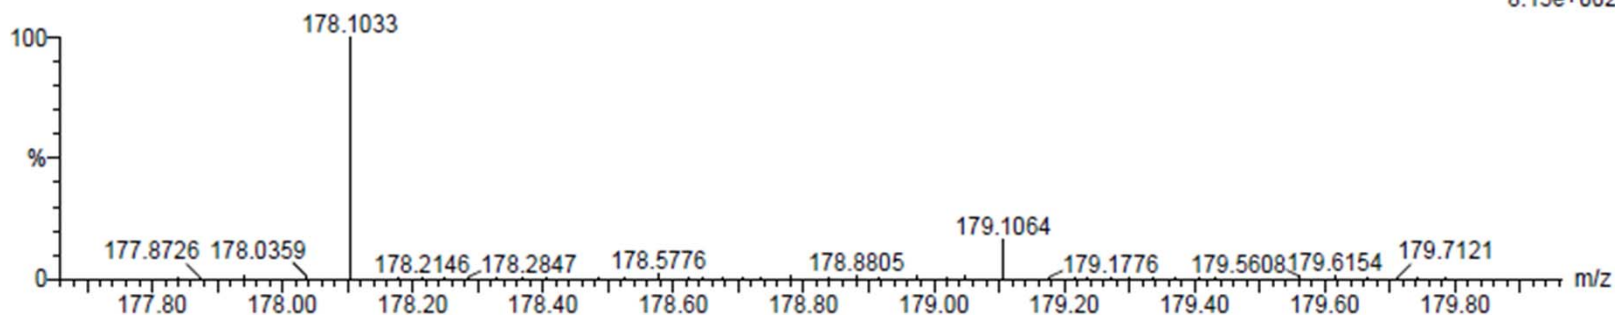

Minimum: -0.5  
Maximum: 5.0 5.0 25.0

| Mass     | Calc. Mass | mDa | PPM | DBE | i-FIT | Formula     |
|----------|------------|-----|-----|-----|-------|-------------|
| 178.1033 | 178.1032   | 0.1 | 0.6 | 5.5 | 2.5   | C11 H13 N F |



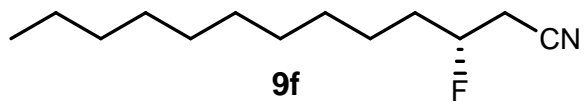

(*R*)-3-fluorotridecanenitrile  
Solvent: CDCl<sub>3</sub>  
400.13 MHz

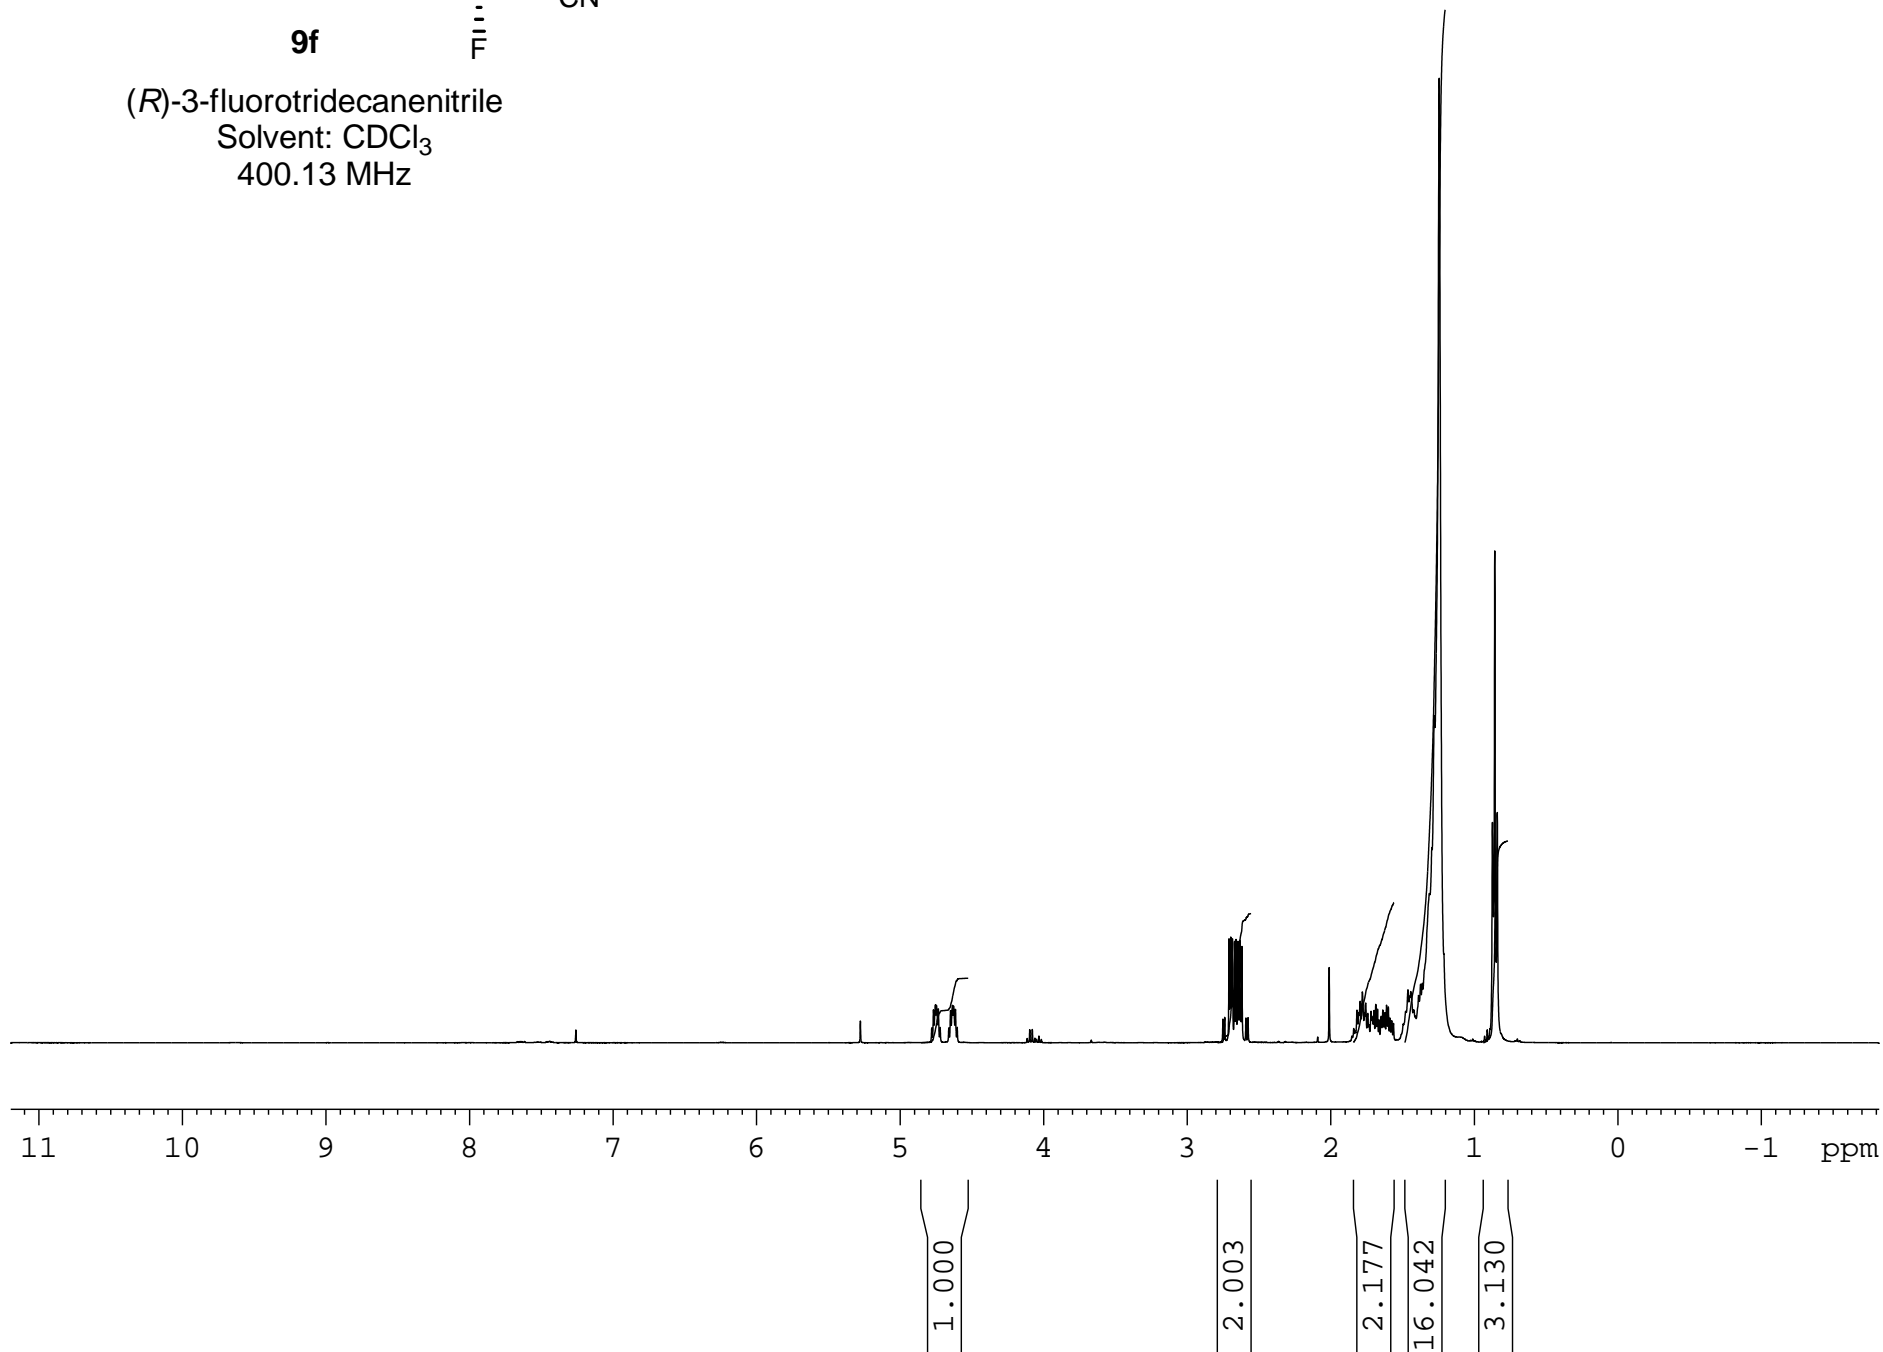

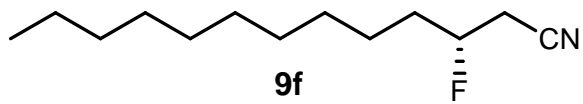

**9f**  
*(R)*-3-fluorotridecanenitrile  
Solvent: CDCl<sub>3</sub>  
100.6 MHz

116.139  
116.078

89.424  
87.661

34.374  
34.174  
31.916  
29.583  
29.516  
29.406  
29.335  
29.171  
24.684  
24.641  
24.144  
23.889  
22.700  
14.114

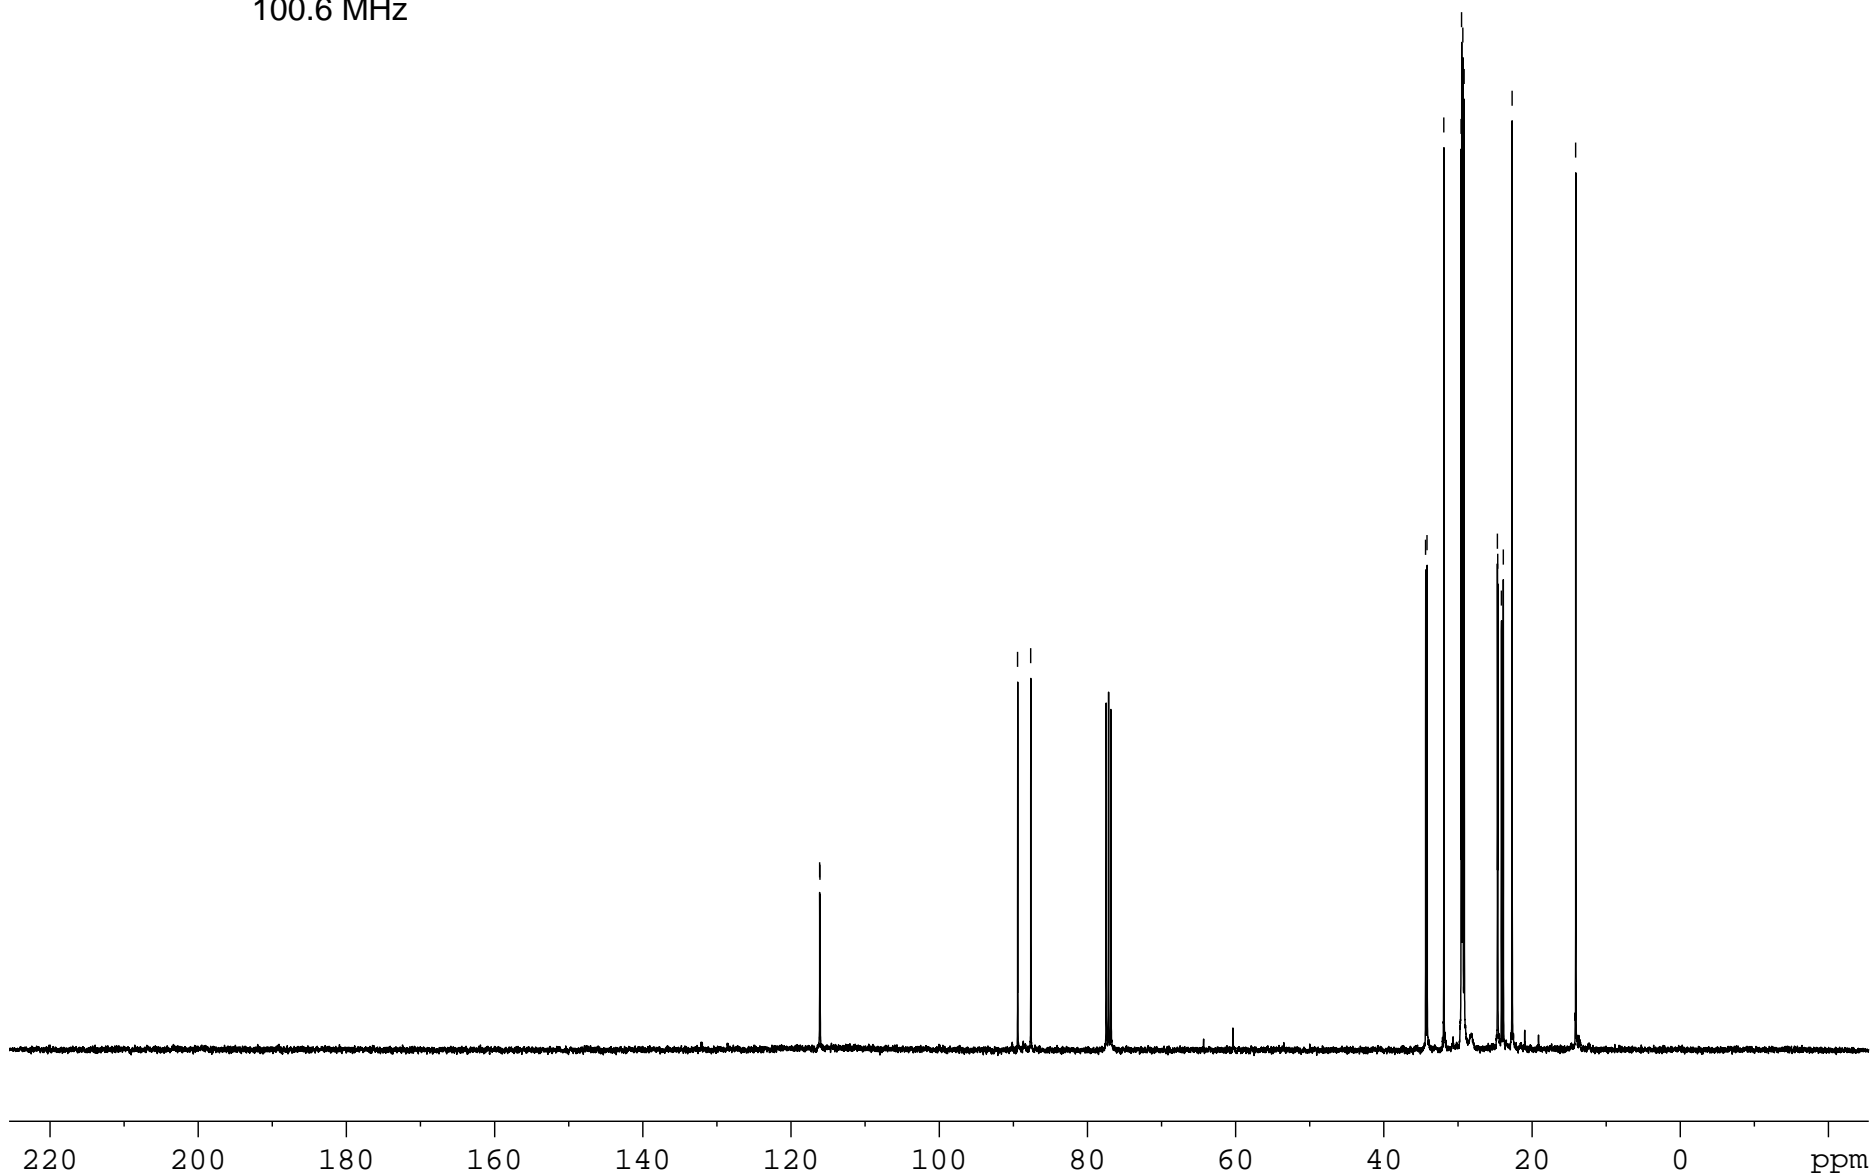

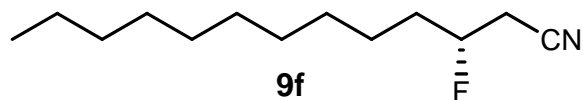

## Elemental Composition Report

Page 1

### Single Mass Analysis

Tolerance = 5.0 PPM / DBE: min = -0.5, max = 25.0

Element prediction: Off

Number of isotope peaks used for i-FIT = 2

Monoisotopic Mass, Even Electron Ions

37 formula(e) evaluated with 1 results within limits (up to 50 best isotopic matches for each mass)

Elements Used:

C: 10-500 H: 10-1000 N: 1-200 F: 1-1 Na: 0-1

**MCO-IV-149**

S/N: UH193

MCO-IV-149\_120612\_001 72 (1.343) AM (Cen,4, 80.00, Ar,8000.0,556.28,0.70); Sm (SG, 2x1.00); Cm (70:80)

06-Dec-2012  
14:14:20  
TOF MS ES+  
2.40e+003

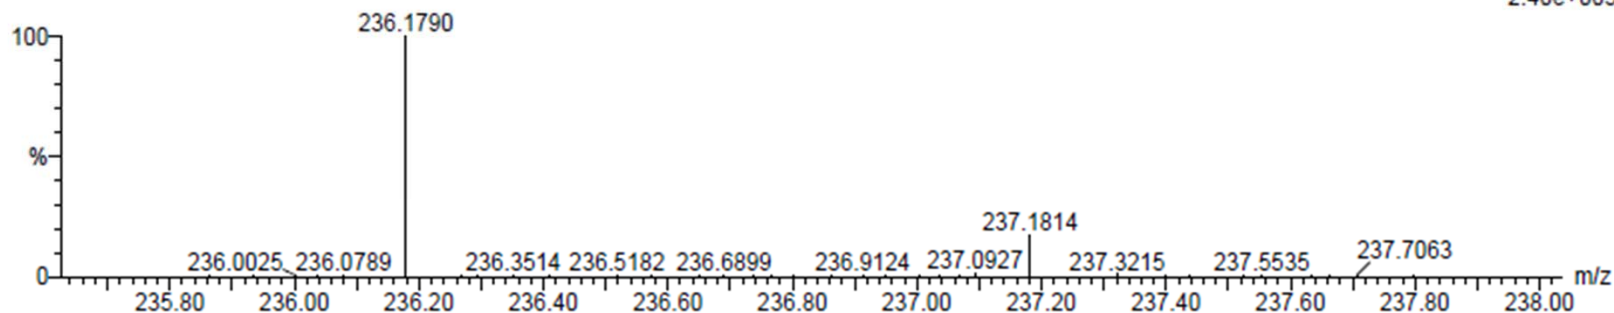

Minimum: -0.5  
Maximum: 5.0 5.0 25.0

| Mass            | Calc. Mass      | mDa        | PPM        | DBE        | i-FIT      | Formula               |
|-----------------|-----------------|------------|------------|------------|------------|-----------------------|
| <b>236.1790</b> | <b>236.1790</b> | <b>0.0</b> | <b>0.0</b> | <b>1.5</b> | <b>2.1</b> | <b>C13 H24 N F Na</b> |

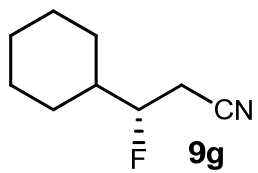

(S)-3-cyclohexyl-3-fluoropropanenitrile

Solvent: CDCl<sub>3</sub>

400.13 MHz

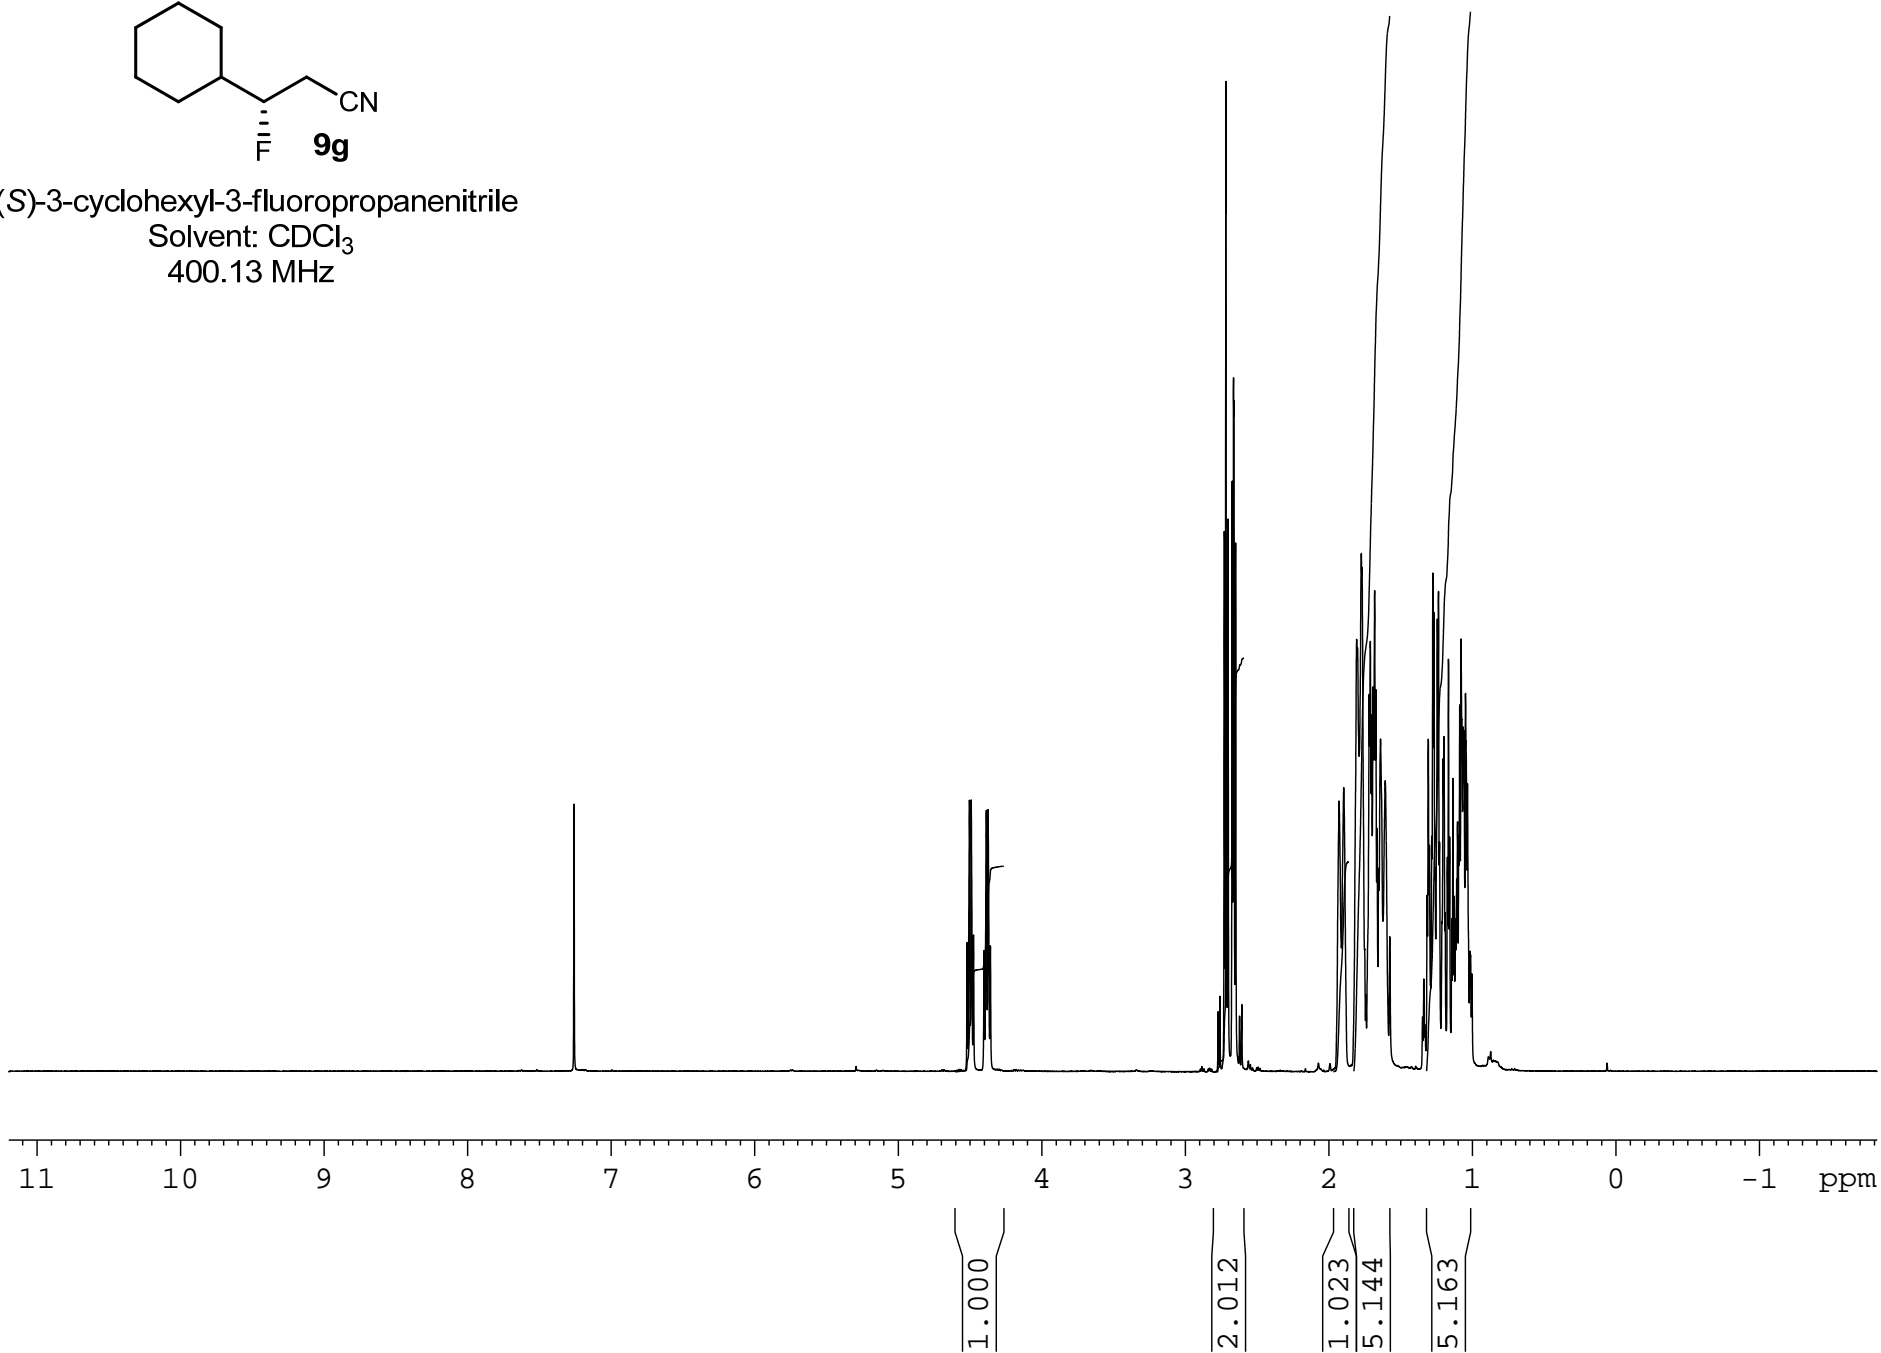

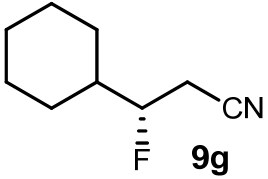

(S)-3-cyclohexyl-3-fluoropropanenitrile  
Solvent: CDCl<sub>3</sub>  
100.6 MHz

116.473  
116.419

93.068  
91.282

41.402  
41.215  
28.257  
28.201  
27.478  
27.429  
26.050  
25.676  
25.414  
21.916  
21.659

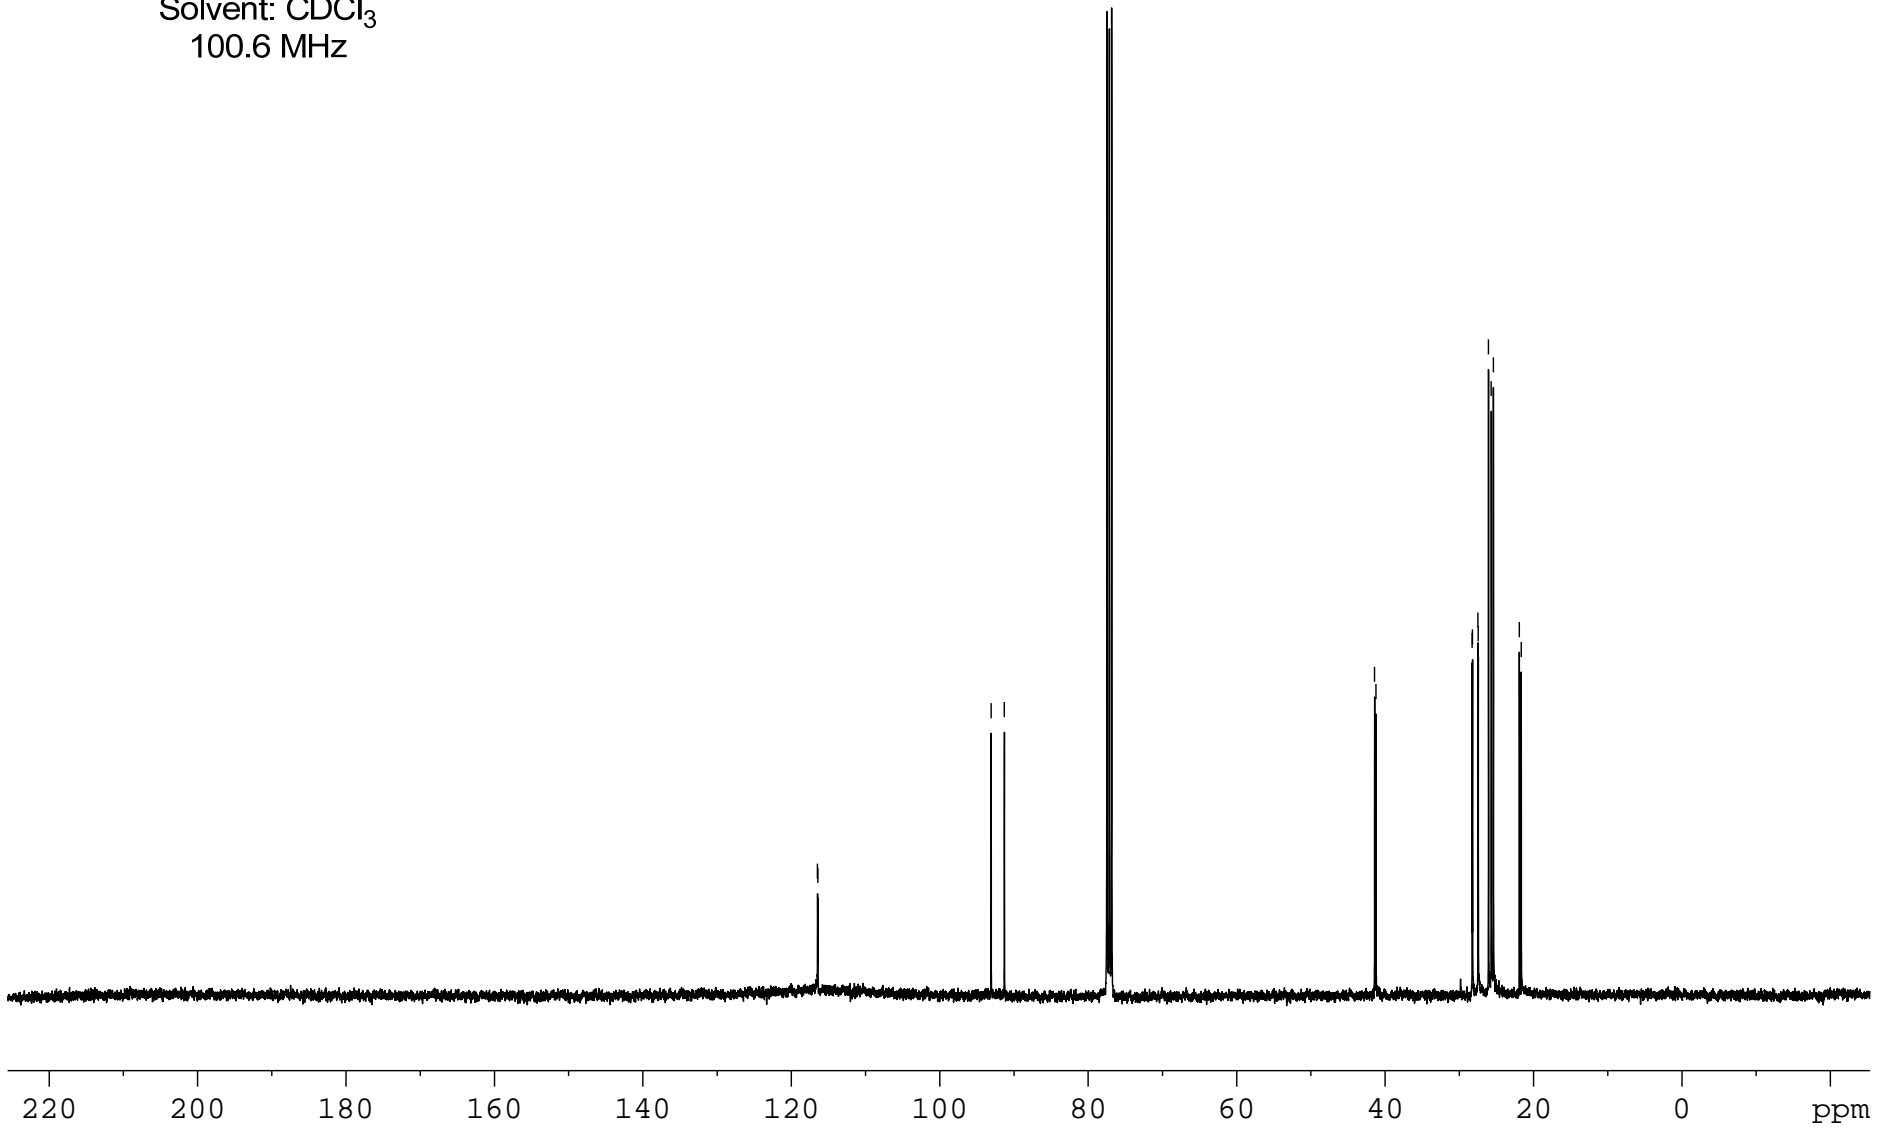

## Elemental Composition Report

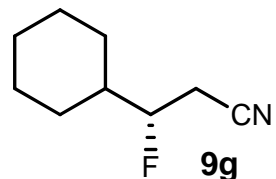

Page 1

### Single Mass Analysis

Tolerance = 5.0 PPM / DBE: min = -0.5, max = 25.0

Element prediction: Off

Number of isotope peaks used for i-FIT = 2

Monoisotopic Mass, Even Electron Ions

11 formula(e) evaluated with 1 results within limits (up to 50 best isotopic matches for each mass)

Elements Used:

C: 5-500 H: 10-1000 N: 1-200 F: 1-1 Na: 1-1

MCO-IV-157

S/N: UH193

MCO-IV-157\_120612\_001 50 (0.935) AM (Cen,4, 80.00, Ar,8000.0,556.28,0.70); Sm (SG, 2x1.00); Cm (40:50)

06-Dec-2012

17:26:07

TOF MS ES+

6.22e+002

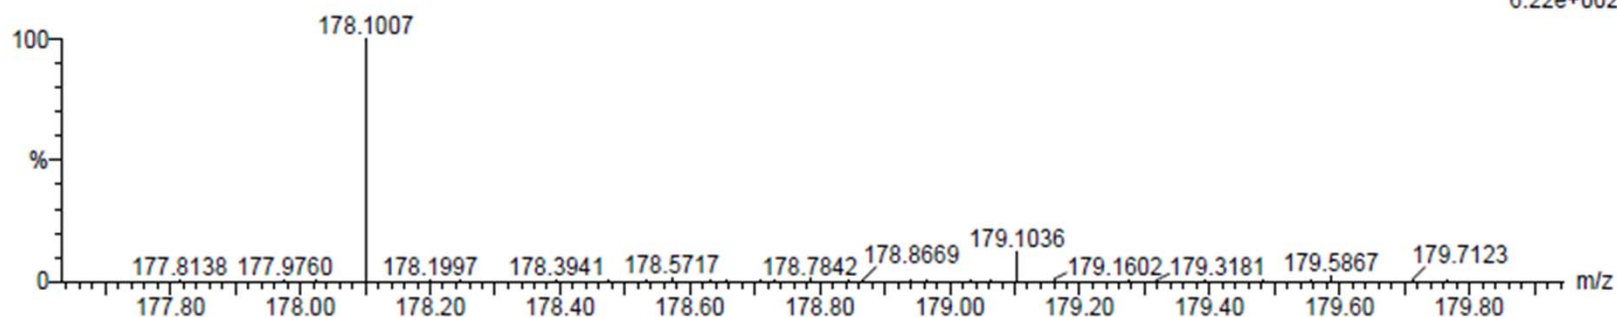

Minimum: -0.5  
Maximum: 5.0 5.0 25.0

| Mass     | Calc. Mass | mDa  | PPM  | DBE | i-FIT | Formula       |
|----------|------------|------|------|-----|-------|---------------|
| 178.1007 | 178.1008   | -0.1 | -0.6 | 2.5 | 0.4   | C9 H14 N F Na |

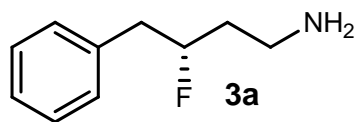

(*R*)-3-fluoro-4-phenylbutan-1-amine

Solvent: CDCl<sub>3</sub>  
400.13 MHz

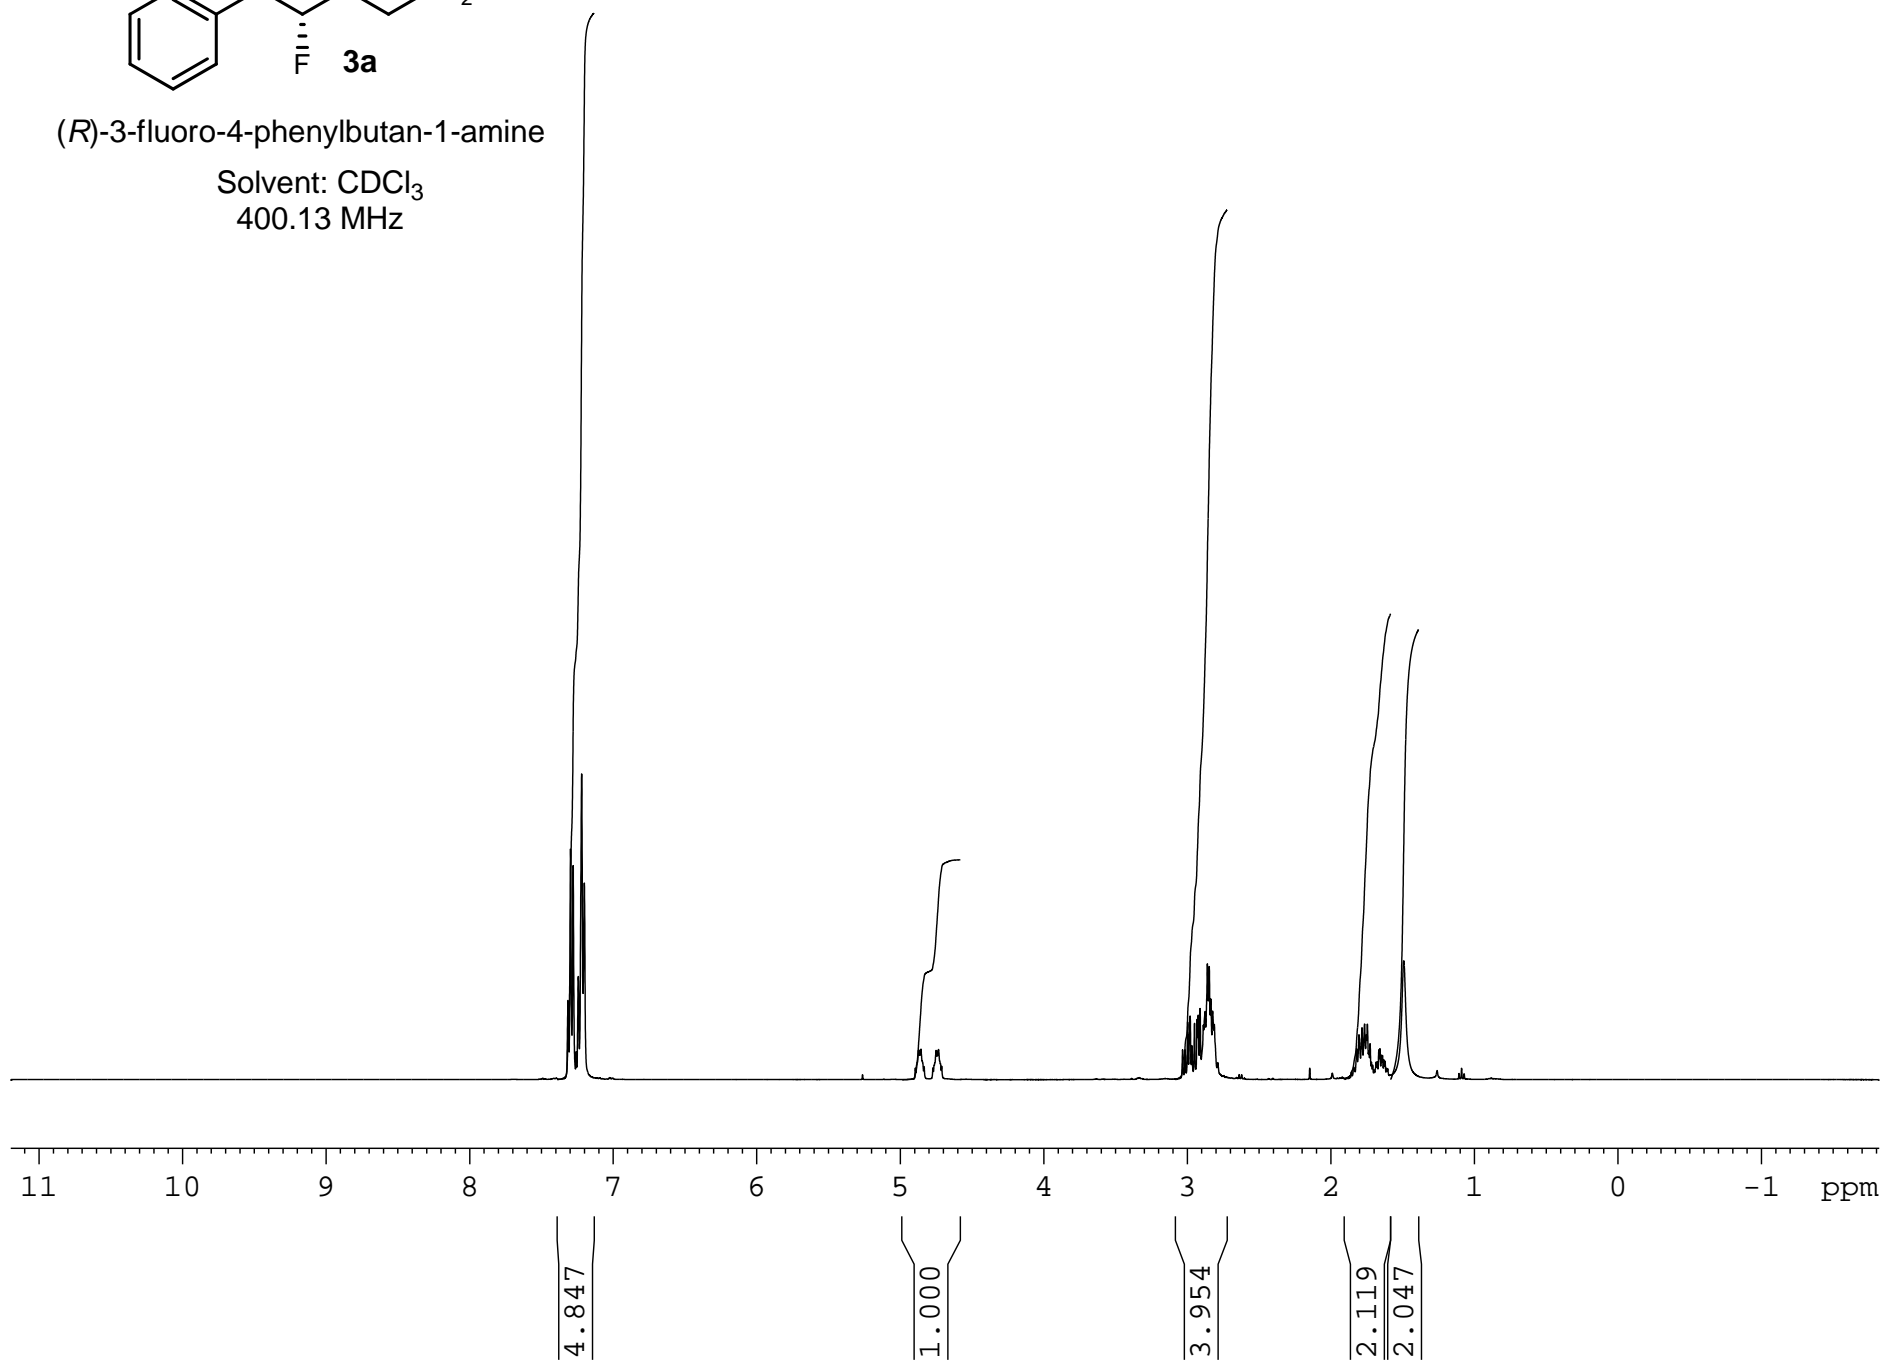

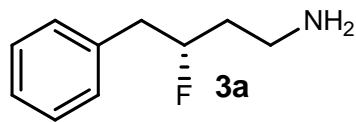

(*R*)-3-fluoro-4-phenylbutan-1-amine

Solvent: CDCl<sub>3</sub>  
100.6 MHz

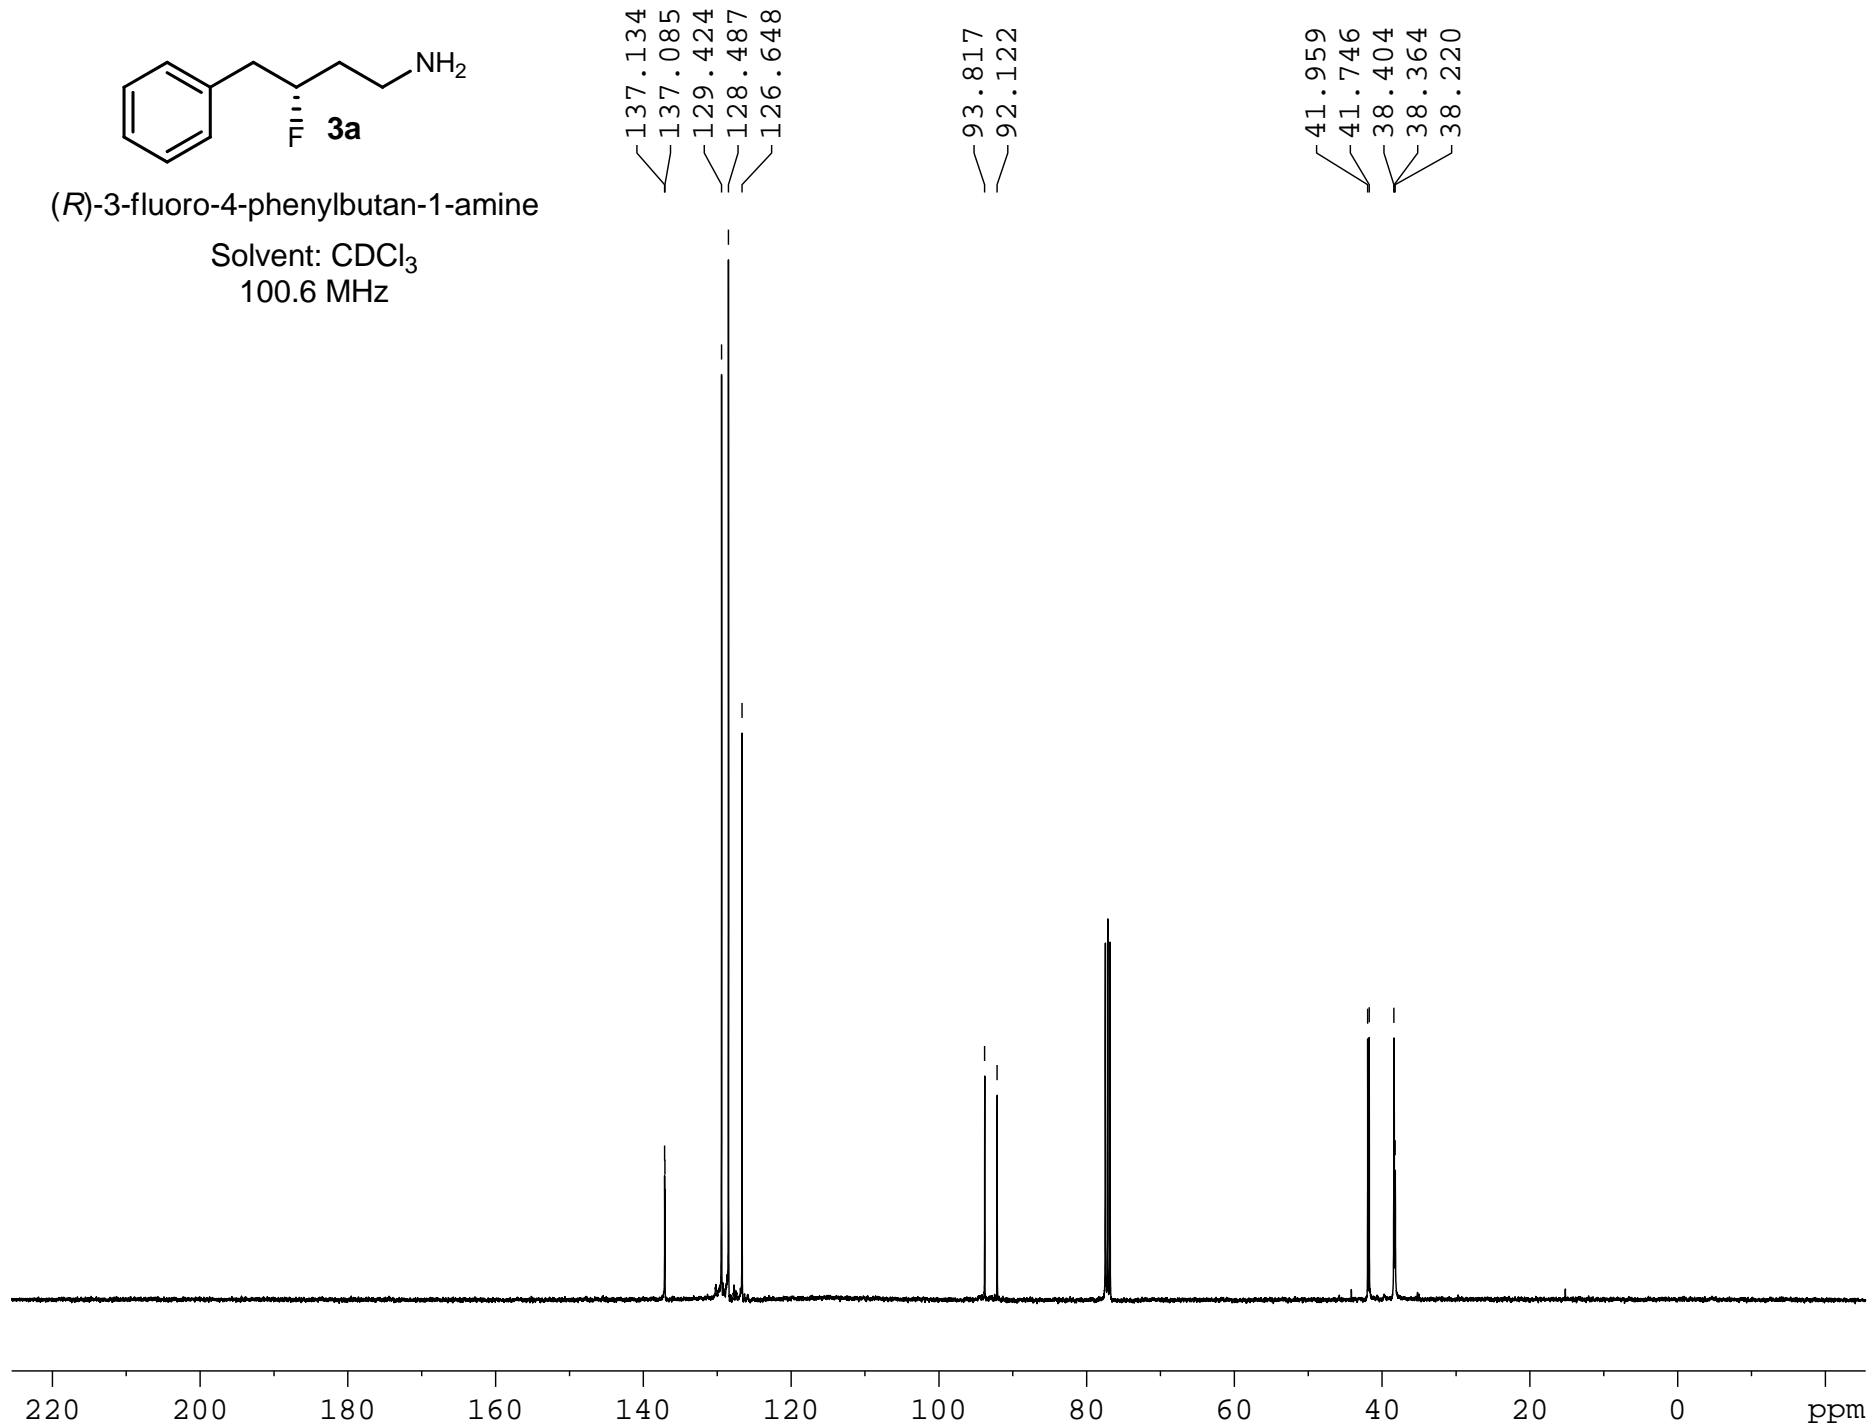



## Elemental Composition Report

Page 1

### Single Mass Analysis

Tolerance = 5.0 PPM / DBE: min = -0.5, max = 25.0

Element prediction: Off

Number of isotope peaks used for i-FIT = 2

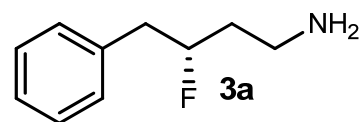

Monoisotopic Mass, Even Electron Ions

9 formula(e) evaluated with 1 results within limits (up to 50 best isotopic matches for each mass)

Elements Used:

C: 10-500 H: 10-1000 N: 1-200 F: 1-1

**MCO-IV-169**

S/N: UH193

MCO-IV-169\_120712\_001 93 (1.733) AM (Cen,4, 80.00, Ar,8000.0,556.28,0.70); Sm (SG, 2x1.00); Cm (90:100)

07-Dec-2012  
10:37:01  
TOF MS ES+  
8.83e+003

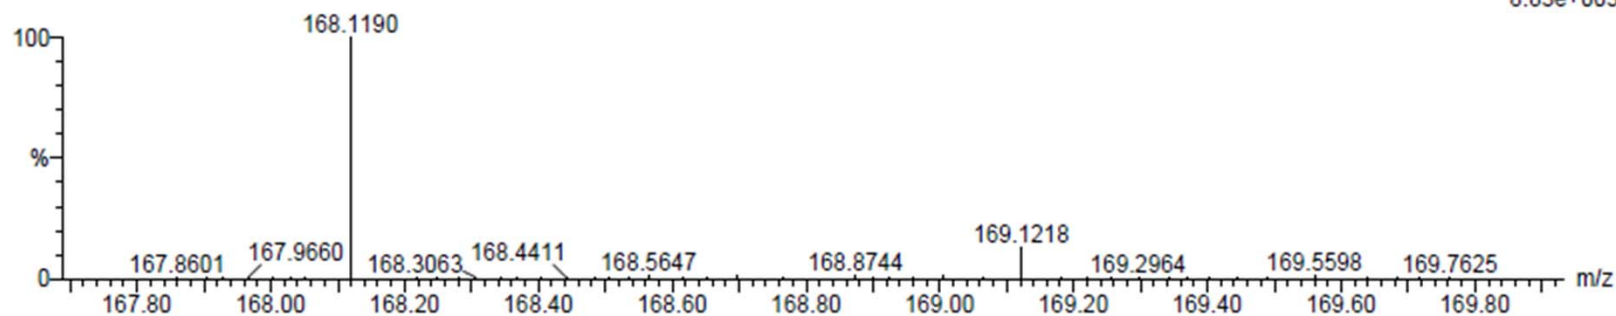

Minimum: -0.5  
Maximum: 5.0 5.0 25.0

| Mass            | Calc. Mass      | mDa        | PPM        | DBE        | i-FIT      | Formula            |
|-----------------|-----------------|------------|------------|------------|------------|--------------------|
| <b>168.1190</b> | <b>168.1189</b> | <b>0.1</b> | <b>0.6</b> | <b>3.5</b> | <b>6.2</b> | <b>C10 H15 N F</b> |

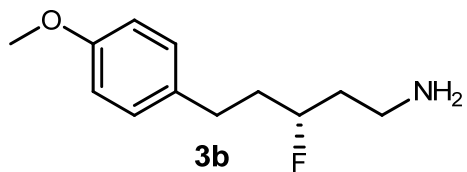

(*R*)-3-fluoro-5-(4-methoxyphenyl)pentan-1-amine

Solvent: MeOD

400.13 MHz

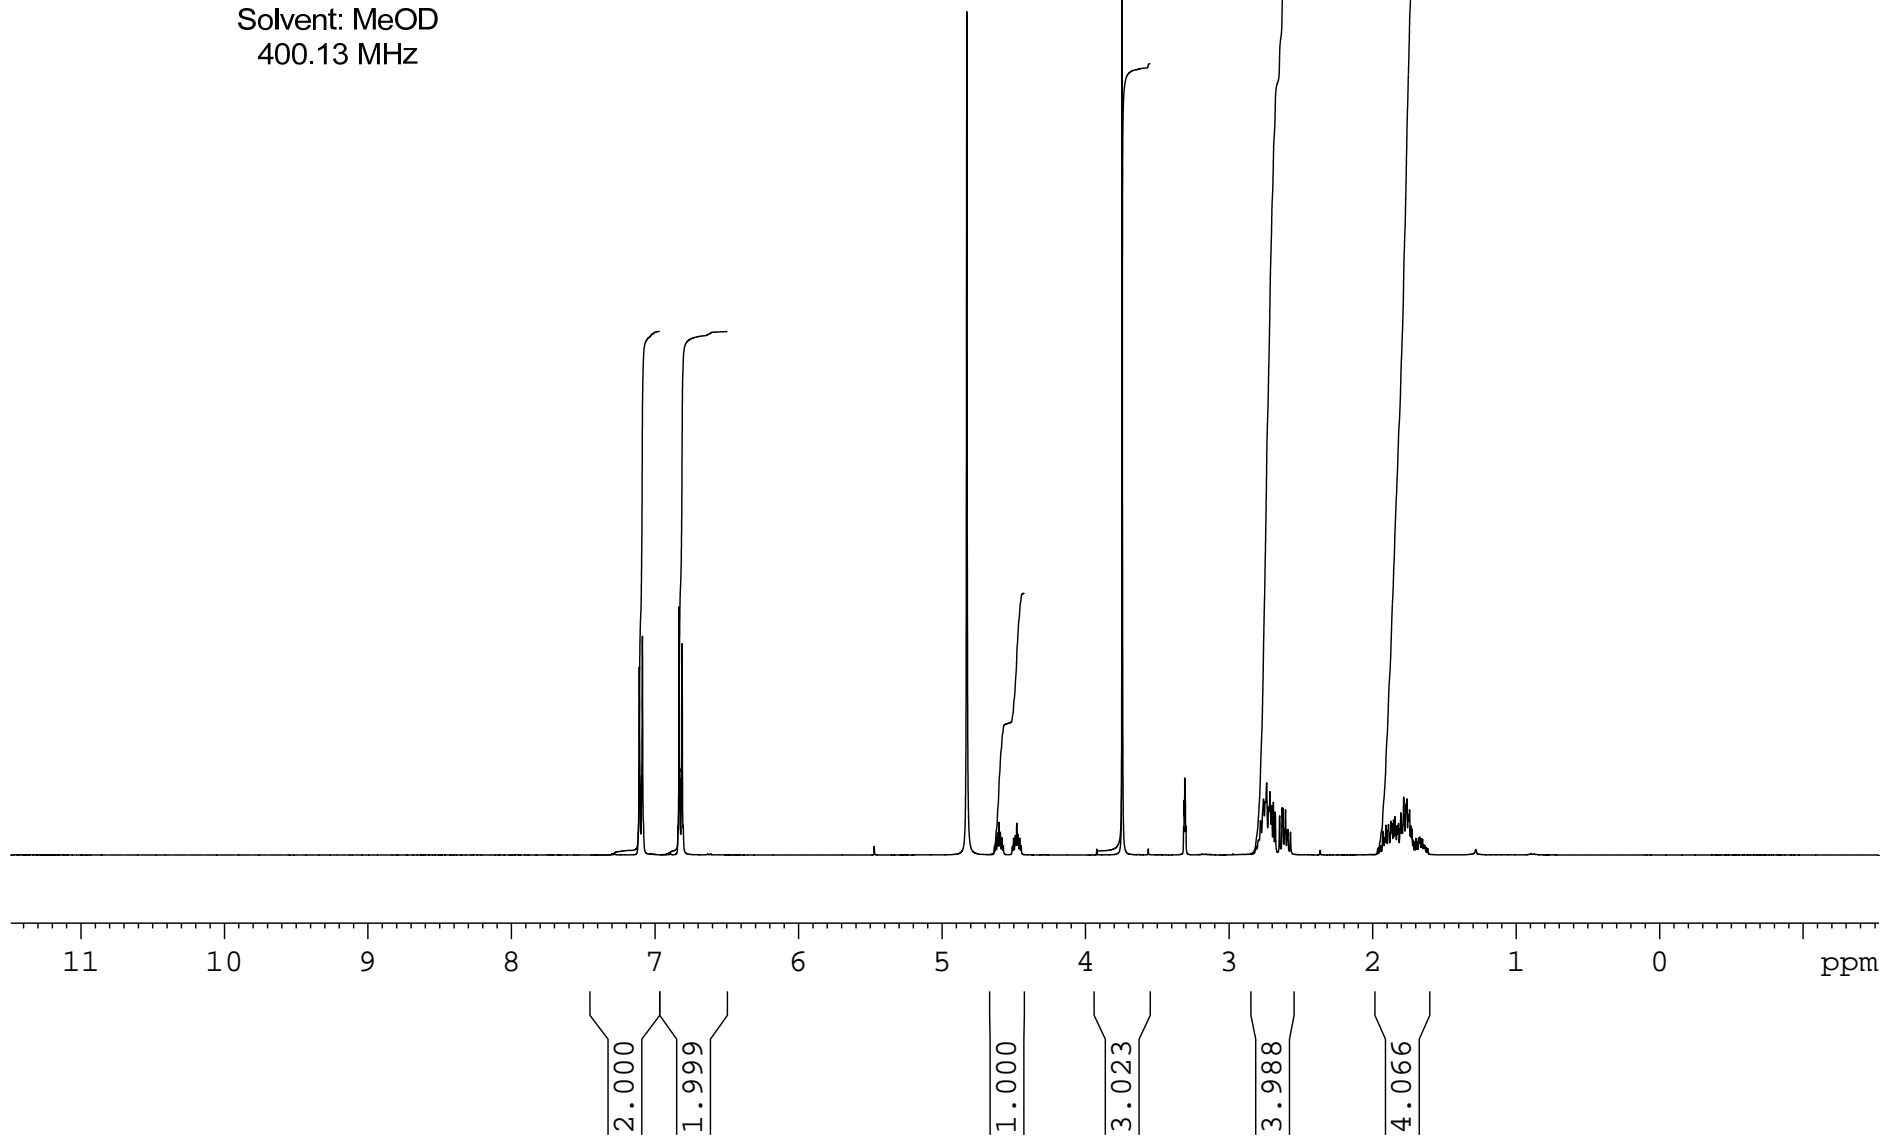

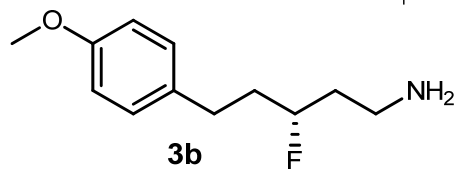

(*R*)-3-fluoro-5-(4-methoxyphenyl)pentan-1-amine  
Solvent: MeOD  
100.6 MHz

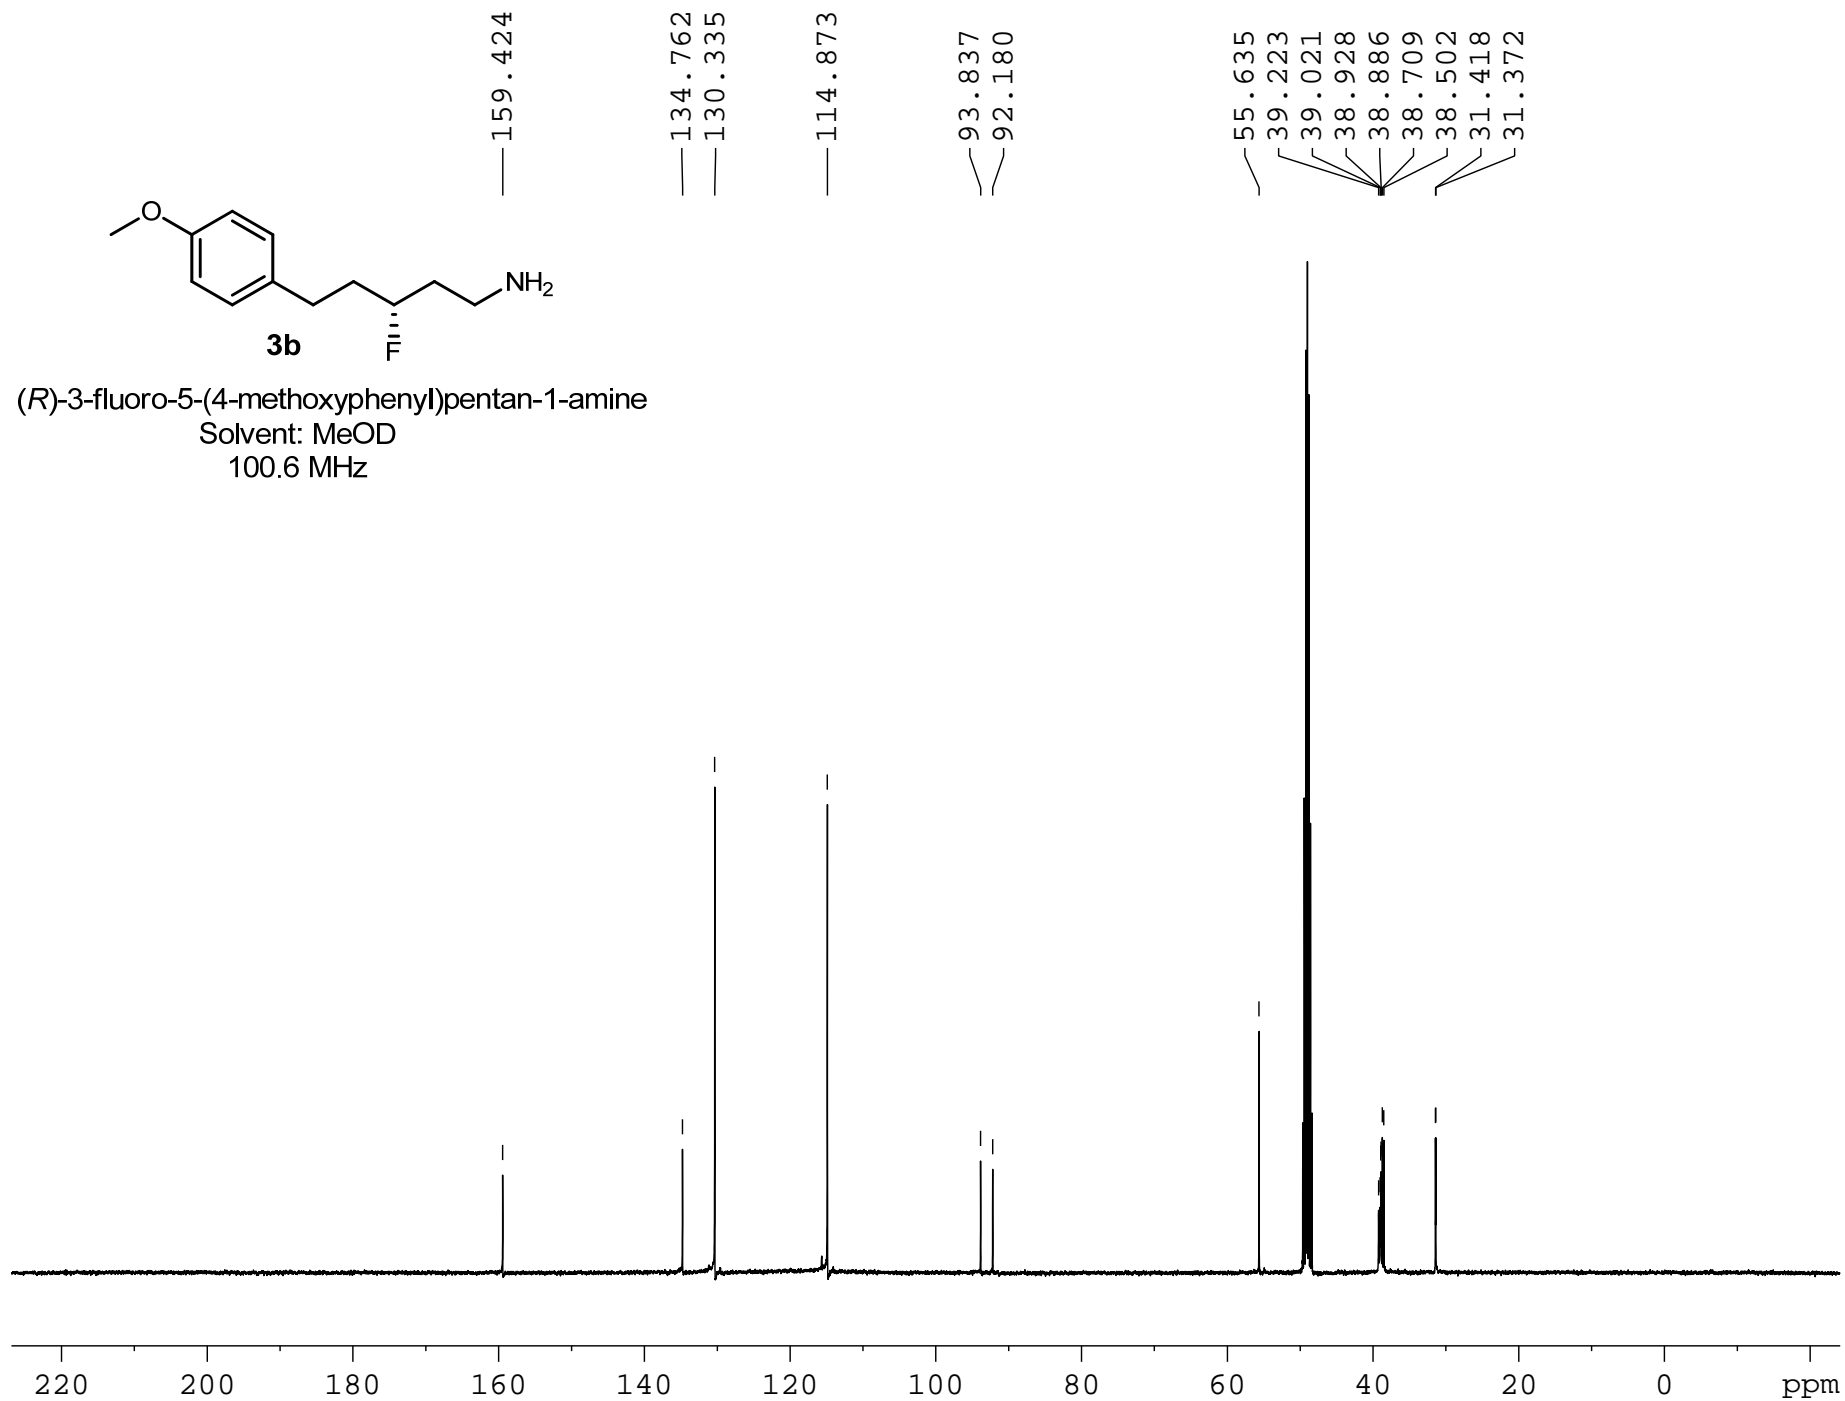

## Elemental Composition Report

### Single Mass Analysis

Tolerance = 5.0 PPM / DBE: min = -0.5, max = 25.0

Element prediction: Off

Number of isotope peaks used for i-FIT = 2

Monoisotopic Mass, Even Electron Ions

70 formula(e) evaluated with 1 results within limits (up to 50 best isotopic matches for each mass)

Elements Used:

C: 10-500 H: 10-1000 N: 1-200 O: 1-200 F: 1-1

MCO-IV-159

S/N: UH193

MCO-IV-159\_120712\_001 58 (1.083) AM (Cen,4, 80.00, Ar,8000.0,556.28,0.70); Sm (SG, 2x1.00); Cm (50:60)

07-Dec-2012

09:08:00

TOF MS ES+

8.67e+003

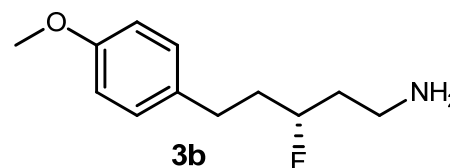

Page 1

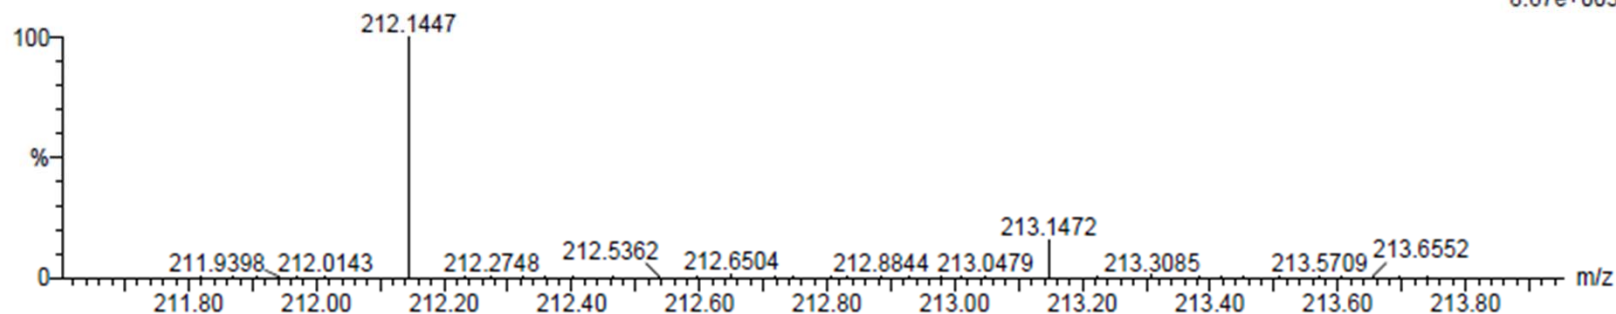

Minimum:

Maximum:

5.0      5.0      -0.5  
25.0

Mass

Calc. Mass

mDa

PPM

DBE

i-FIT

Formula

212.1447

212.1451

-0.4

-1.9

3.5

5.5

C12 H19 N O F

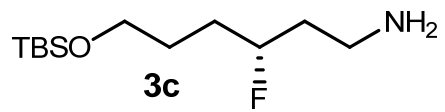

(*R*)-6-((*tert*-butyldimethylsilyl)oxy)-3-fluorohexan-1-amine

Solvent: MeOD

400.13 MHz

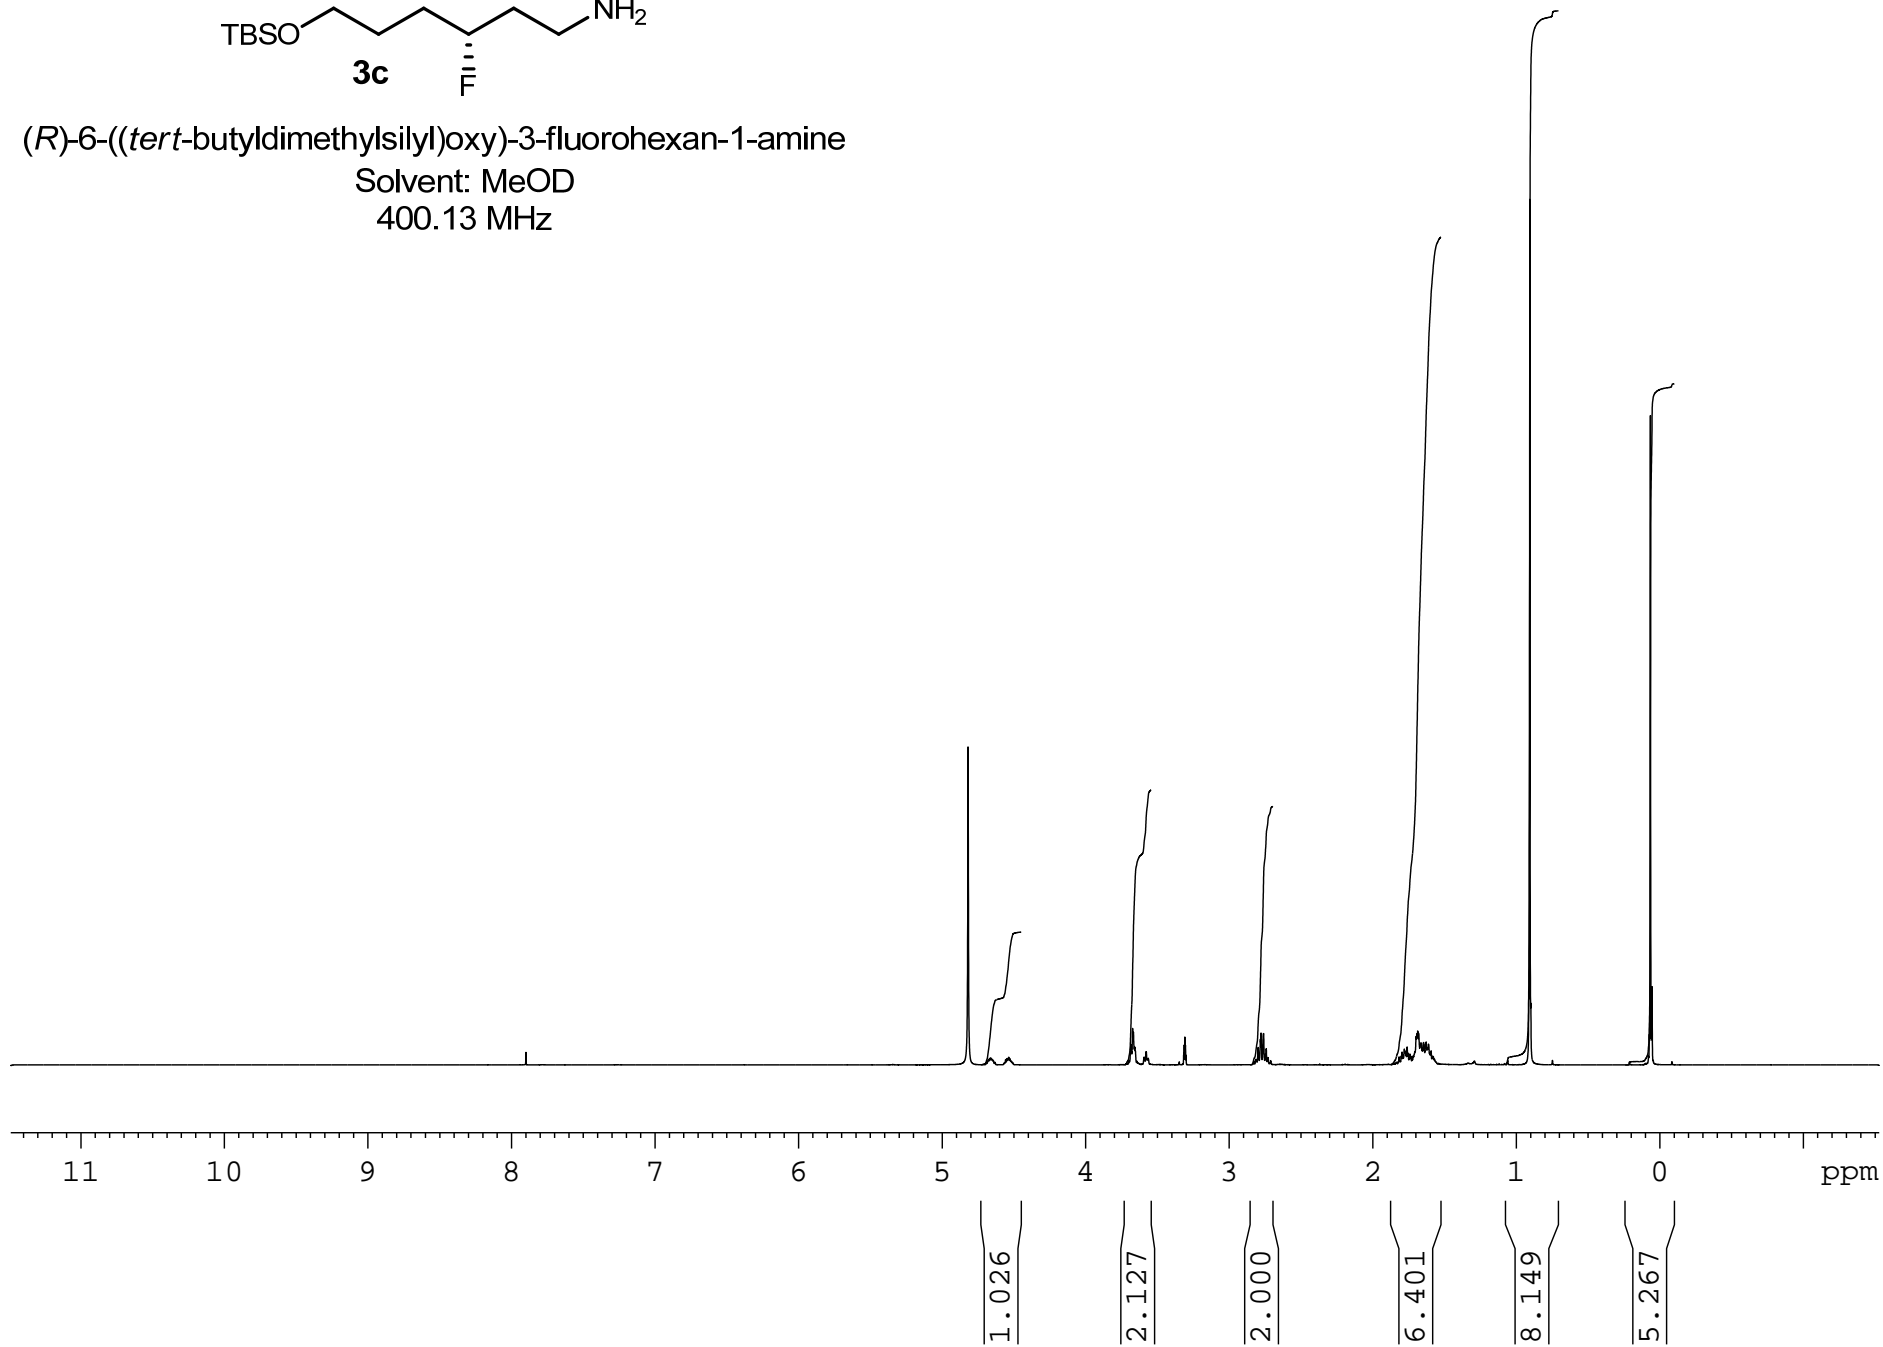

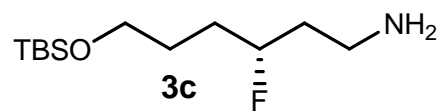

(*R*)-6-((*tert*-butyldimethylsilyl)oxy)-3-fluorohexan-1-amine

Solvent: MeOD

100.6 MHz

94.555  
92.901

63.880

39.369  
39.164  
38.972  
38.928

33.071  
32.861

29.509  
29.468  
26.413  
19.132

-5.184

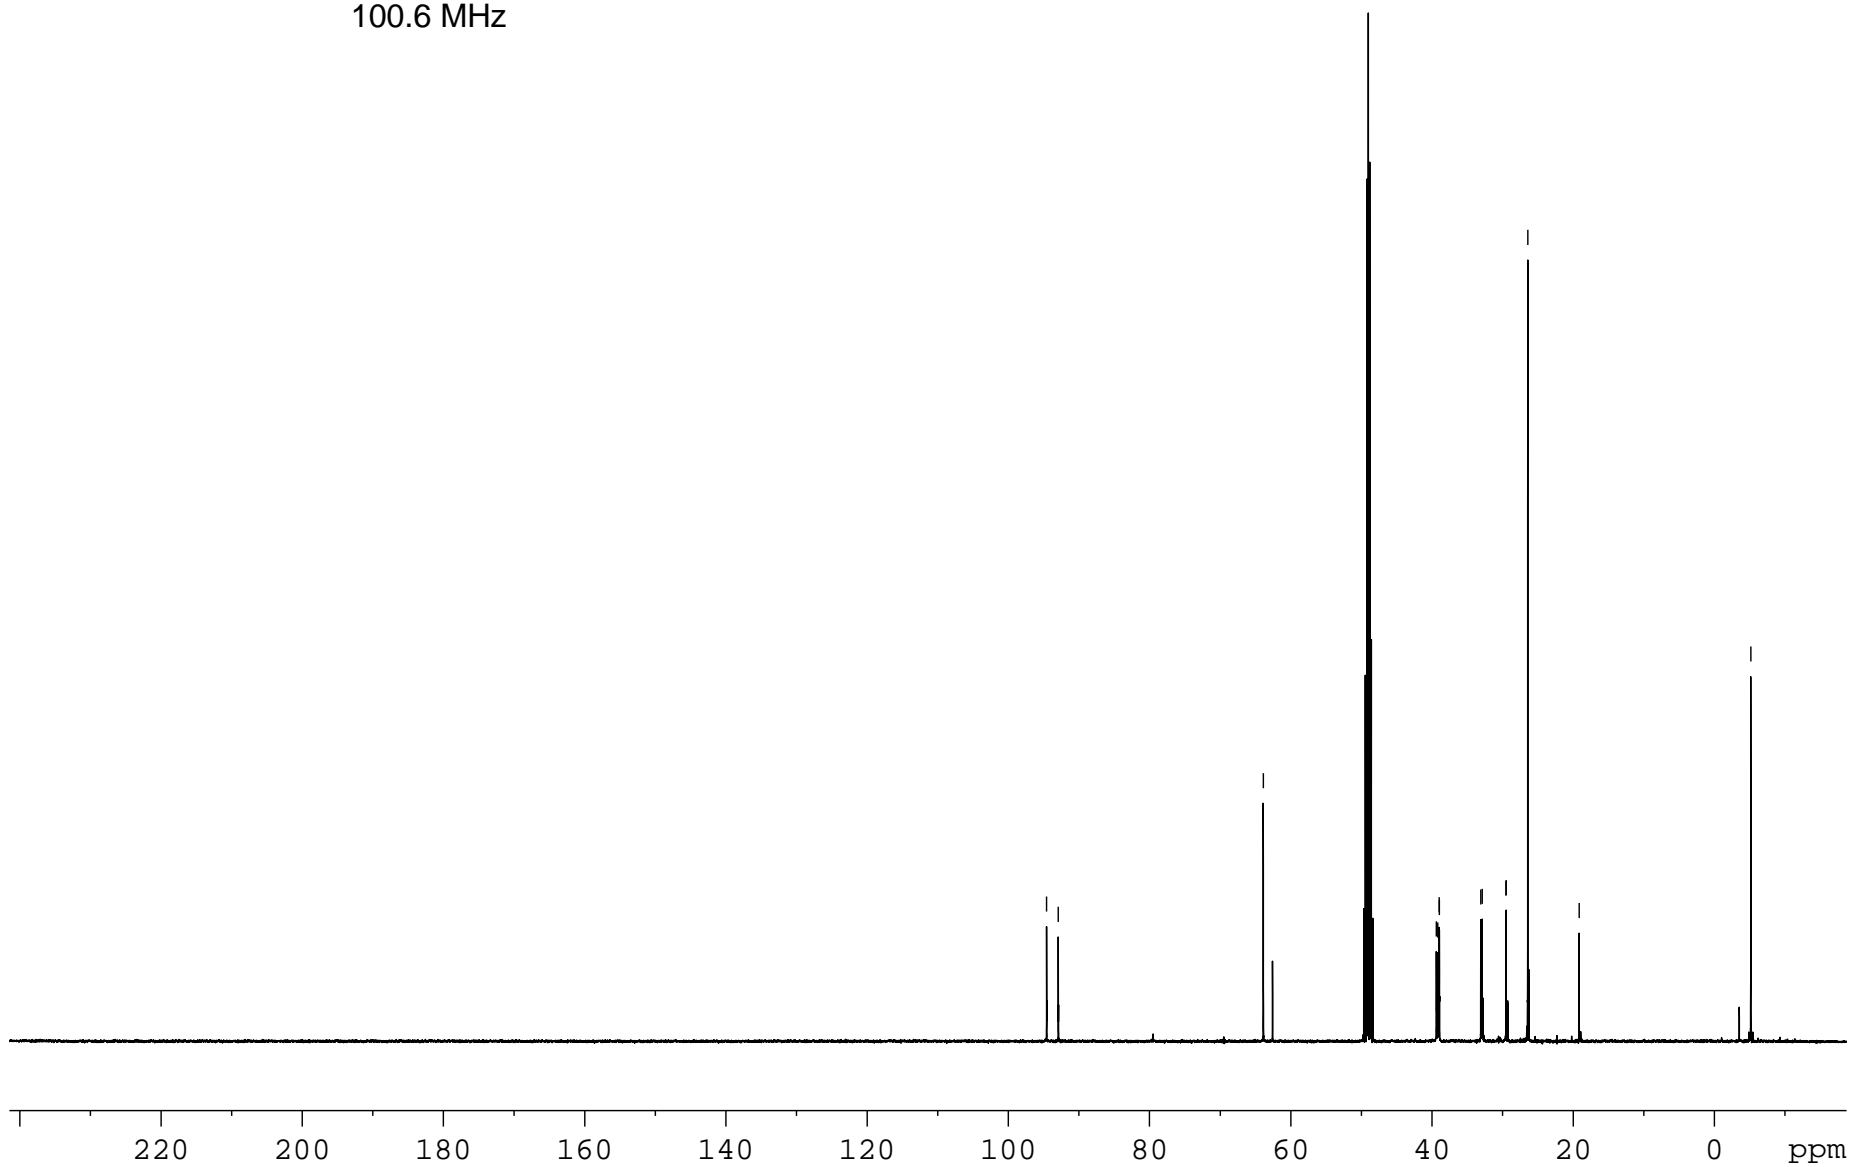

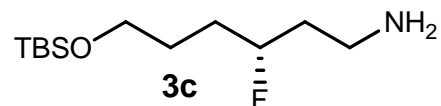

### Elemental Composition Report

#### Single Mass Analysis

Tolerance = 5.0 PPM / DBE: min = -0.5, max = 25.0

Element prediction: Off

Number of isotope peaks used for i-FIT = 2

Monoisotopic Mass, Even Electron Ions

80 formula(e) evaluated with 1 results within limits (up to 50 best isotopic matches for each mass)

Elements Used:

C: 10-500 H: 10-1000 N: 1-200 O: 1-200 F: 1-1 Si: 1-1

MCO-IV-172

S/N: UH193

MCO-IV-172\_120712\_001 98 (1.825) AM (Cen,4, 80.00, Ar,8000.0,556.28,0.70); Sm (SG, 2x1.00); Cm (90:100)

07-Dec-2012  
11:26:36  
TOF MS ES+  
8.71e+003

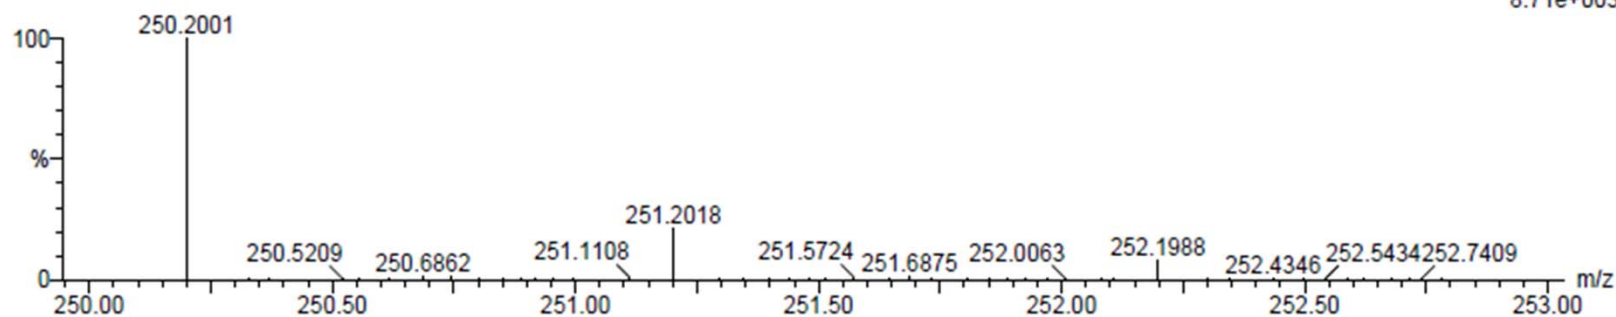

Minimum: -0.5  
Maximum: 5.0 5.0 25.0

| Mass     | Calc. Mass | mDa  | PPM  | DBE  | i-FIT | Formula          |
|----------|------------|------|------|------|-------|------------------|
| 250.2001 | 250.2002   | -0.1 | -0.4 | -0.5 | 7.0   | C12 H29 N O F Si |

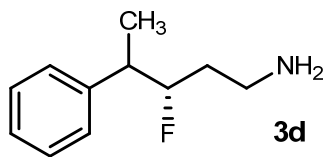

(3S)-3-fluoro-4-phenylpentan-1-amine

Diastereomer A

Solvent: MeOD

400.13 MHz

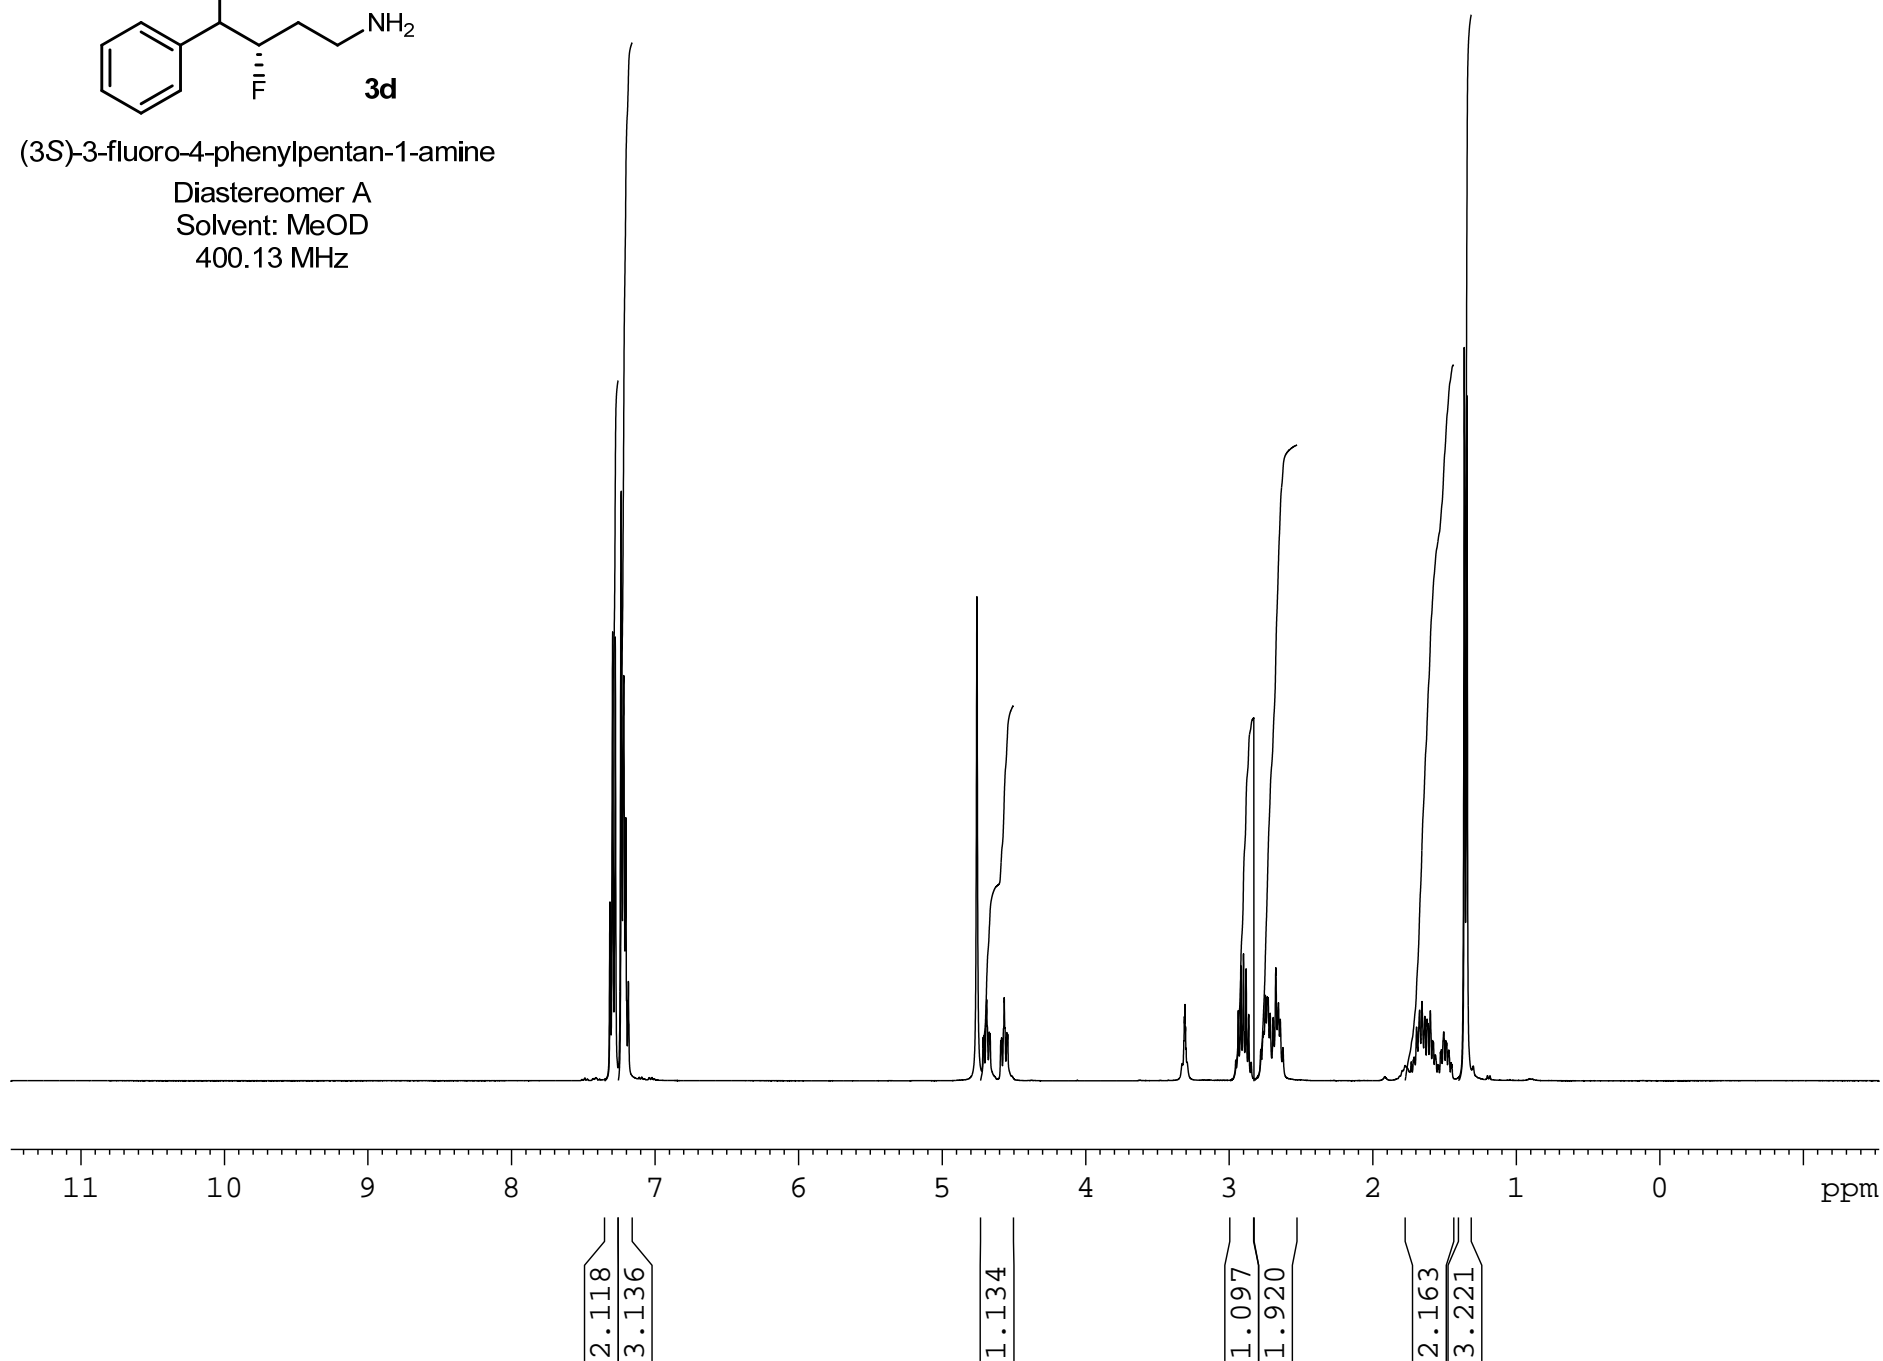



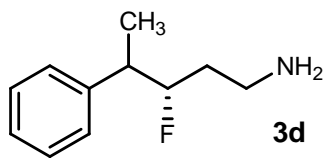

(3S)-3-fluoro-4-phenylpentan-1-amine

Diastereomer A

Solvent: MeOD

100.6 MHz

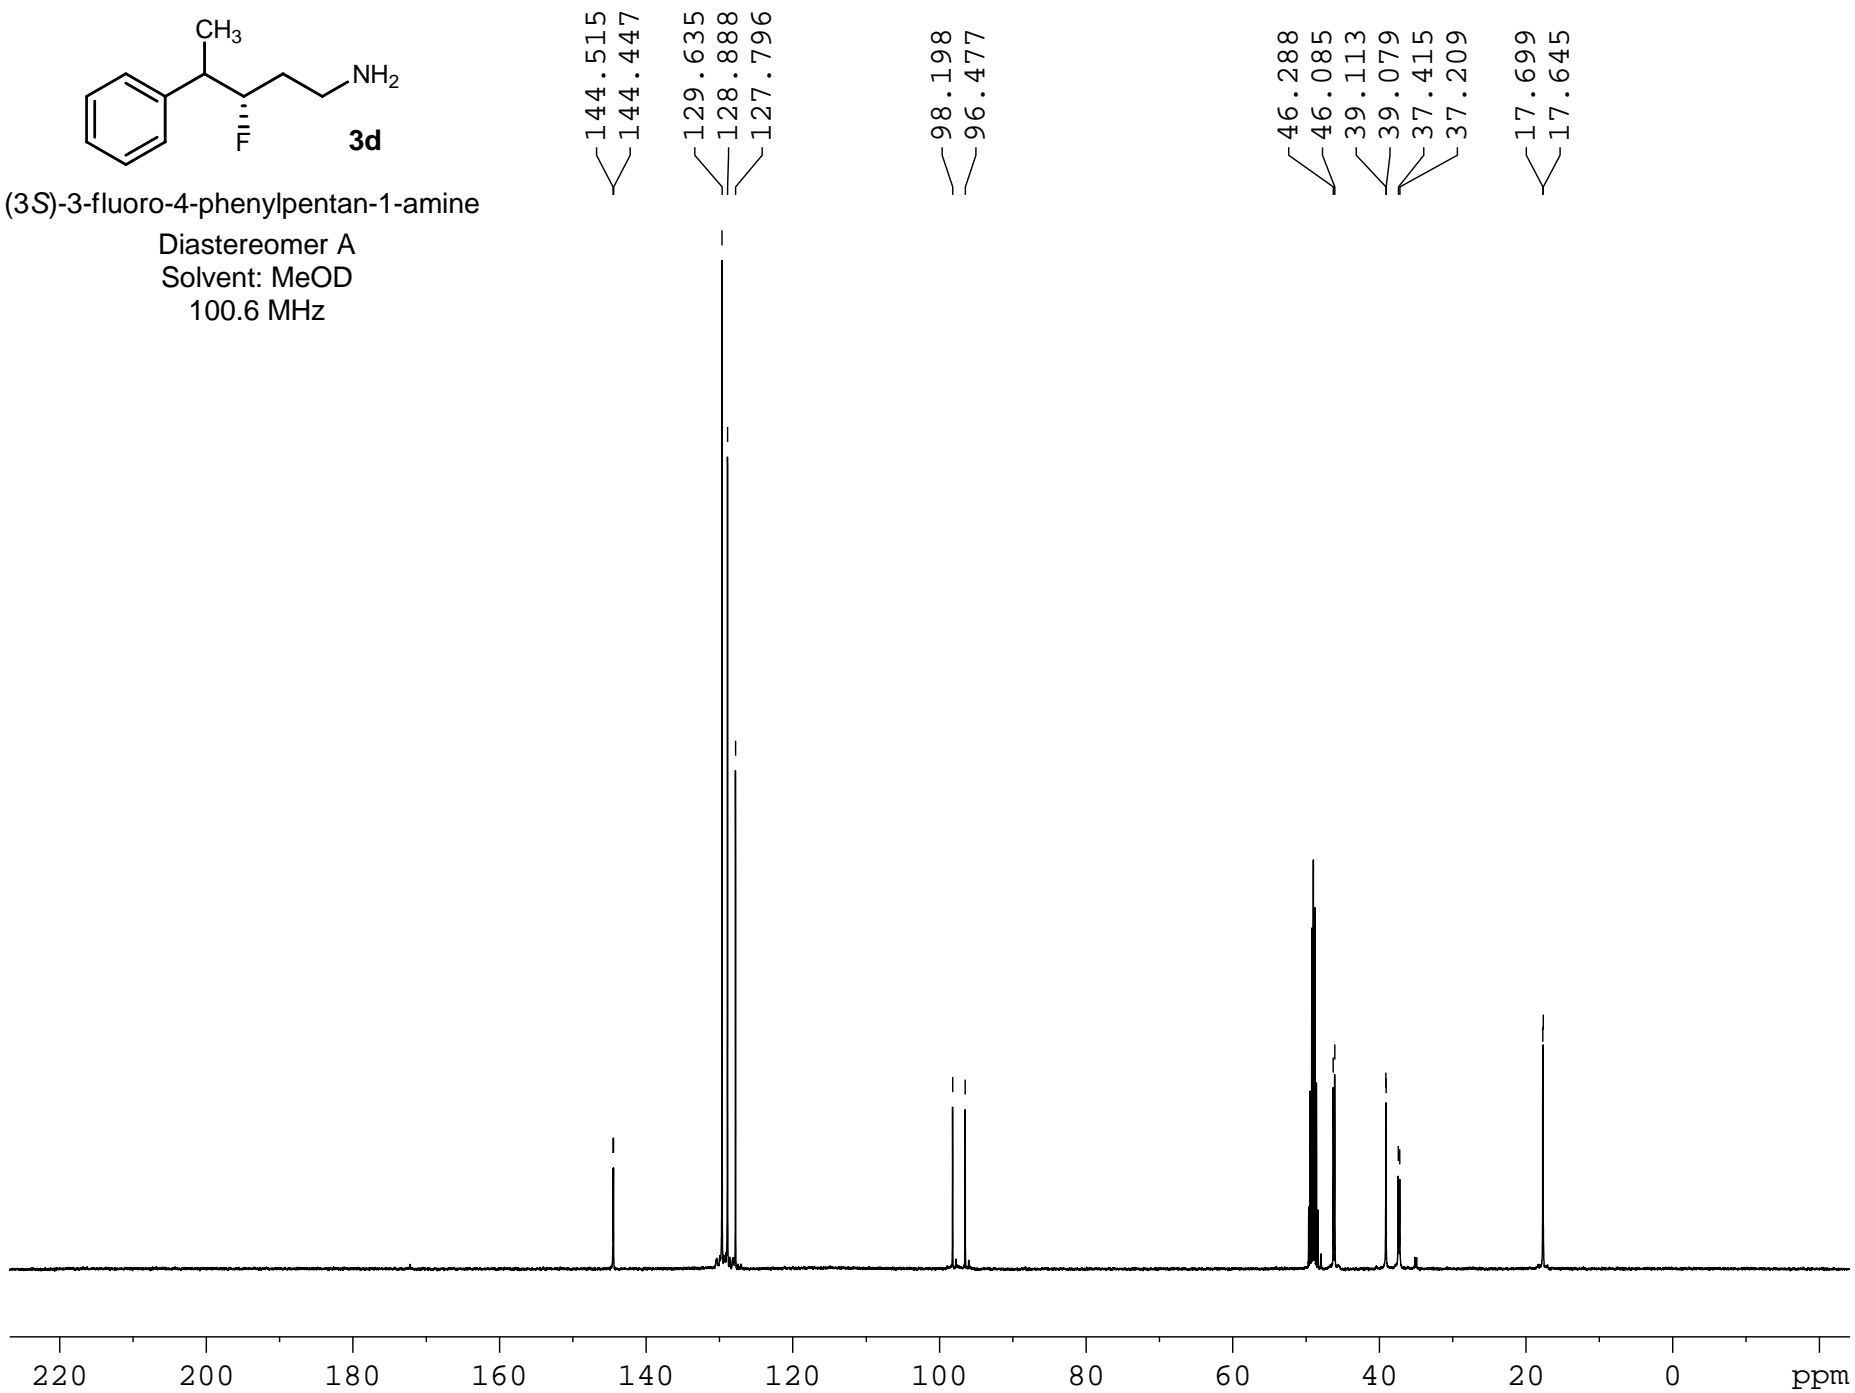

## Elemental Composition Report

### Single Mass Analysis

Tolerance = 5.0 PPM / DBE: min = -0.5, max = 25.0

Element prediction: Off

Number of isotope peaks used for i-FIT = 2

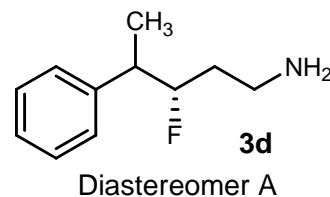

Page 1

Monoisotopic Mass, Even Electron Ions

11 formula(e) evaluated with 1 results within limits (up to 50 best isotopic matches for each mass)

Elements Used:

C: 10-500 H: 10-1000 N: 1-200 F: 1-1

MCO-IV-163

S/N: UH193

MCO-IV-163\_120712\_001 59 (1.102) AM (Cen,4, 80.00, Ar,8000.0,556.28,0.70); Sm (SG, 2x1.00); Cm (50:60)

07-Dec-2012  
10:01:45  
TOF MS ES+  
9.07e+003

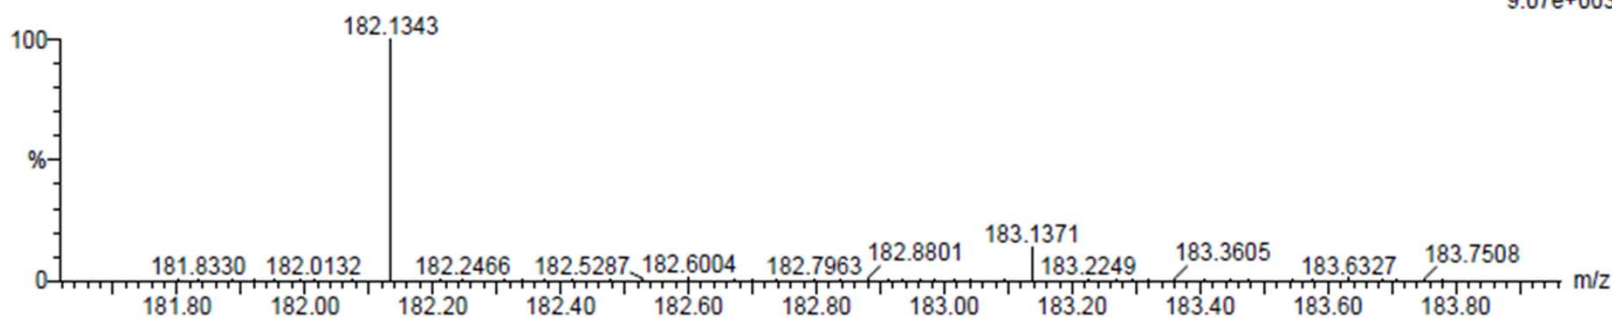

Minimum: -0.5  
Maximum: 5.0 5.0 25.0

| Mass     | Calc. Mass | mDa  | PPM  | DBE | i-FIT | Formula     |
|----------|------------|------|------|-----|-------|-------------|
| 182.1343 | 182.1345   | -0.2 | -1.1 | 3.5 | 1.5   | C11 H17 N F |

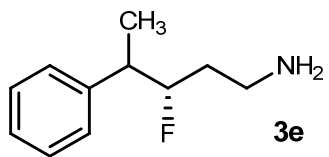

(3S)-3-fluoro-4-phenylpentan-1-amine

Diastereomer B

Solvent: MeOD

400.13 MHz

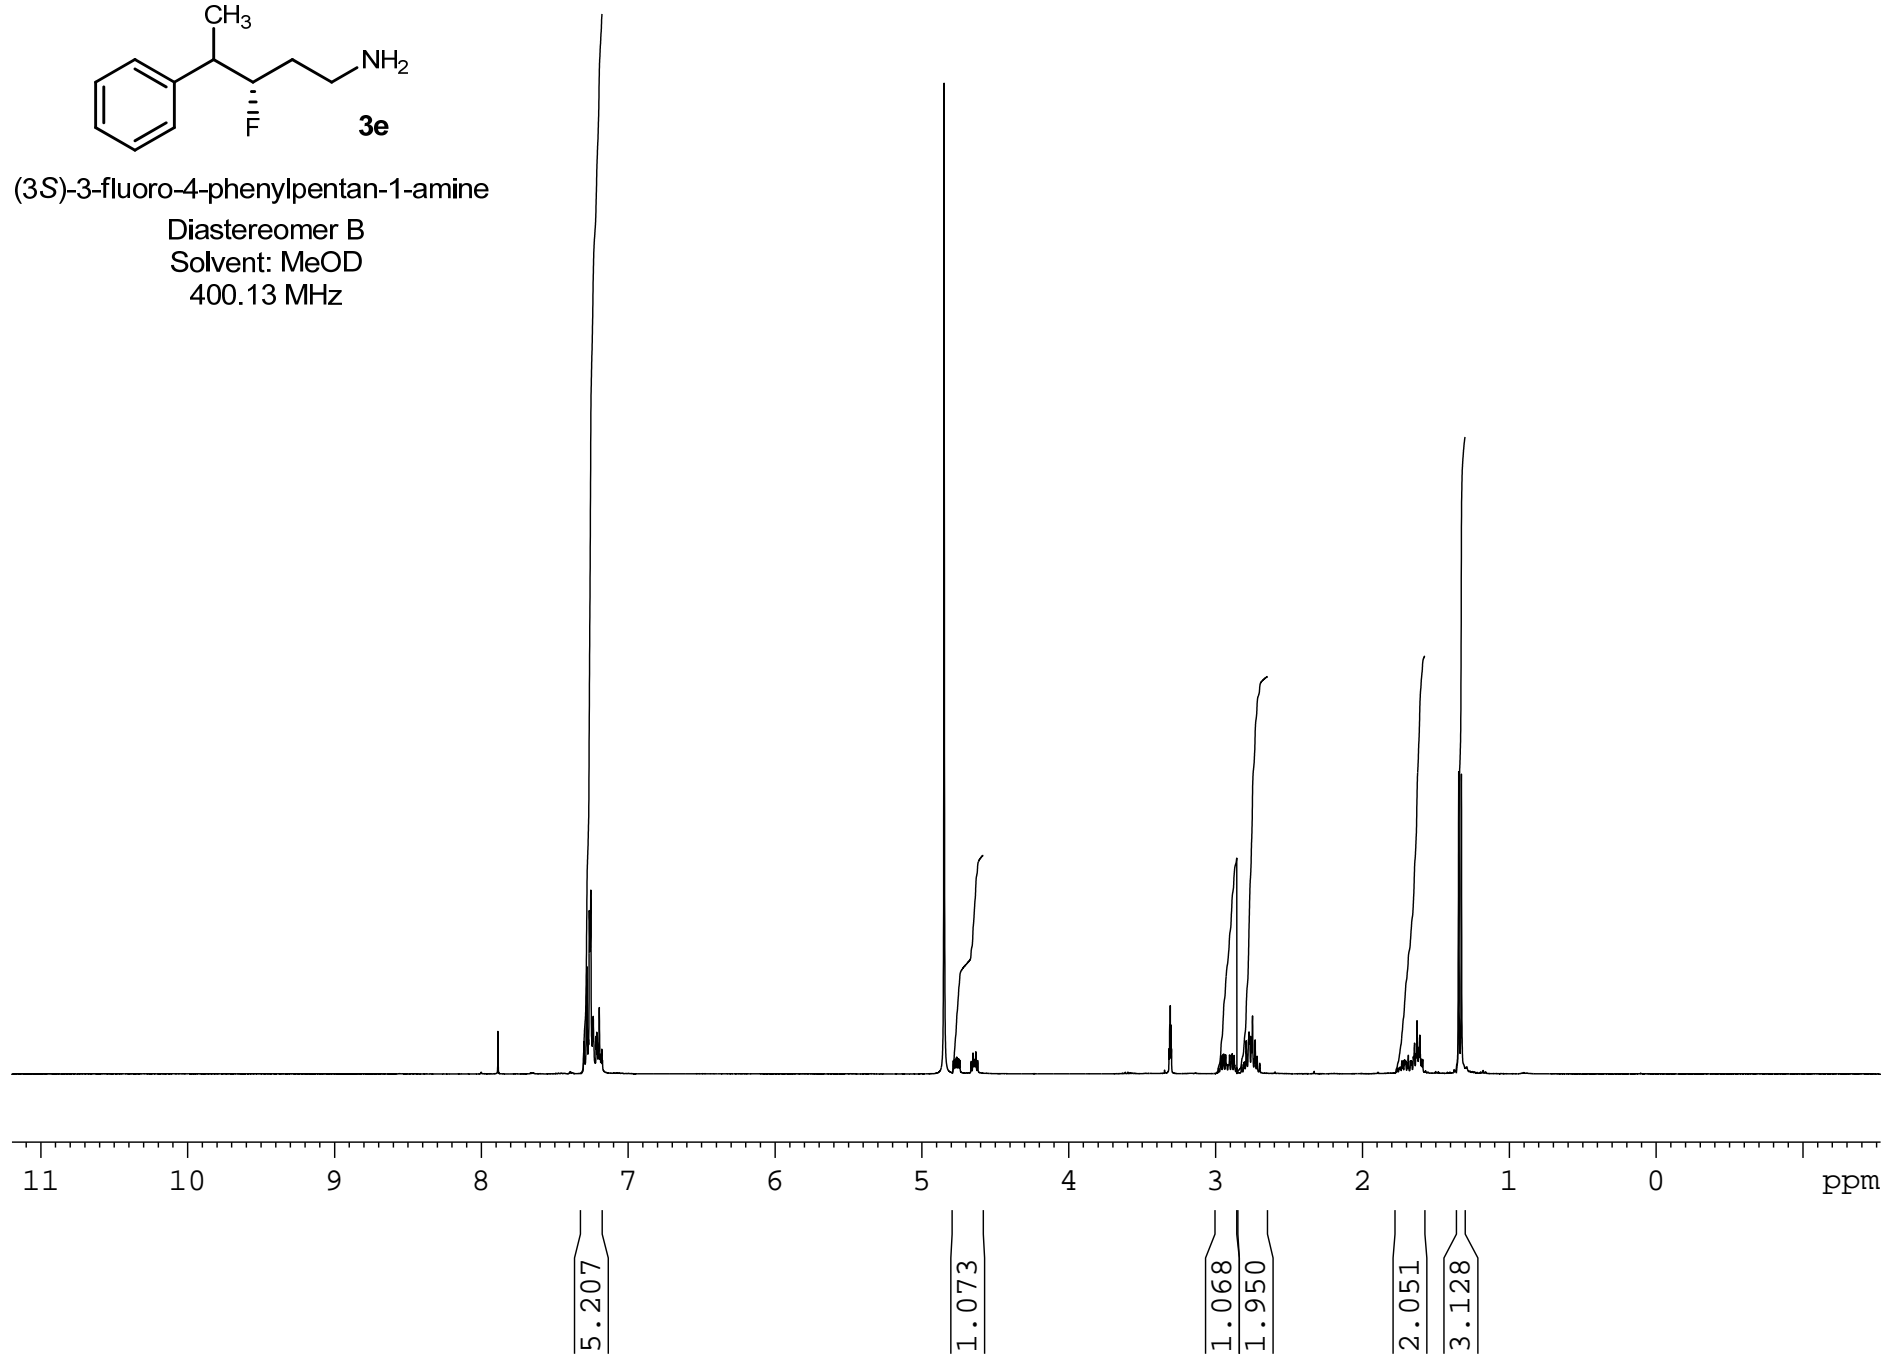

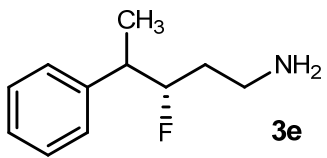

(3S)-3-fluoro-4-phenylpentan-1-amine

Diastereomer B

Solvent: MeOD

100.6 MHz

143.633  
143.611  
129.375  
129.278  
127.618

97.667  
95.949

45.703  
45.506  
39.001  
38.961  
36.555  
36.348

17.987  
17.930

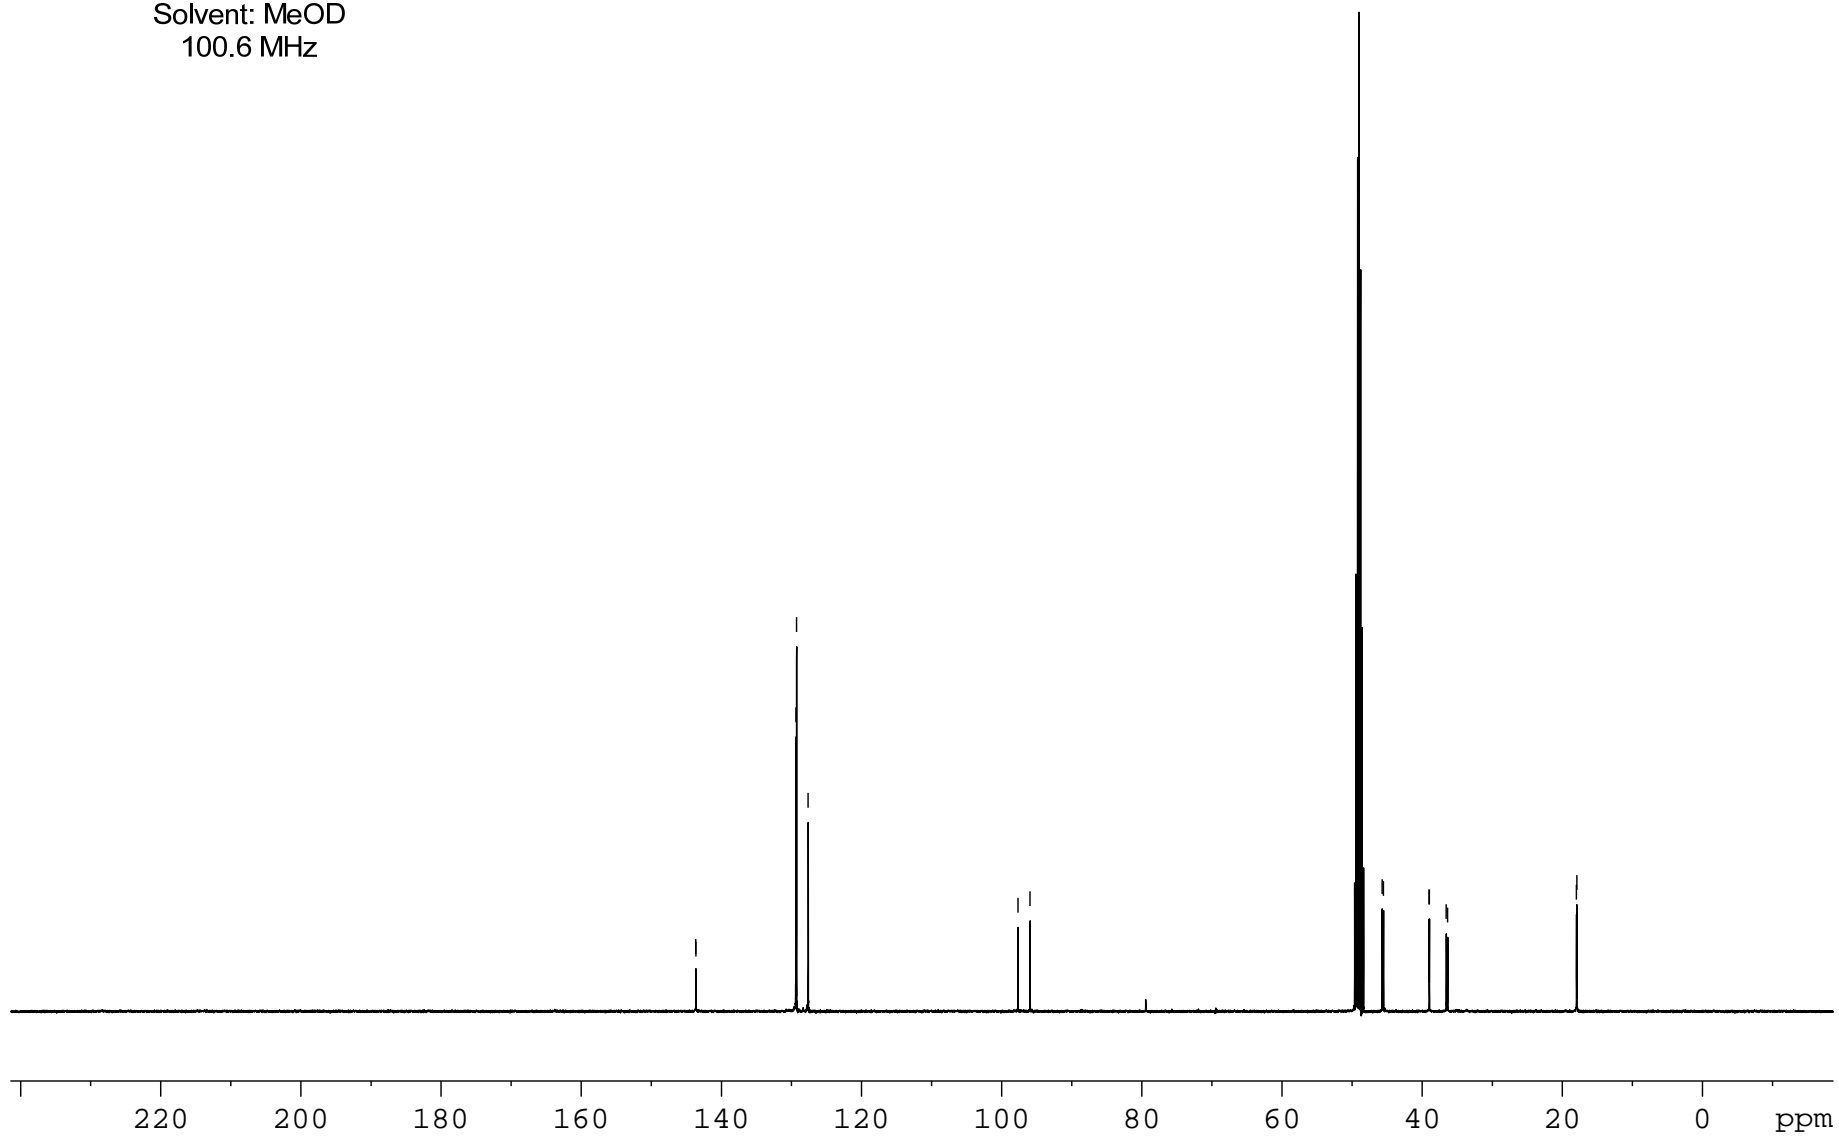

## Elemental Composition Report

### Single Mass Analysis

Tolerance = 5.0 PPM / DBE: min = -0.5, max = 25.0

Element prediction: Off

Number of isotope peaks used for i-FIT = 2

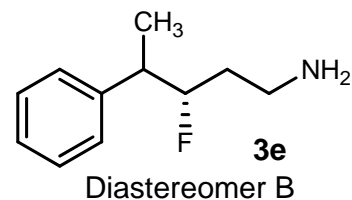

Page 1

Monoisotopic Mass, Even Electron Ions

11 formula(e) evaluated with 1 results within limits (up to 50 best isotopic matches for each mass)

Elements Used:

C: 10-500 H: 10-1000 N: 1-200 F: 1-1

MCO-IV-170

S/N: UH193

MCO-IV-170\_120712\_001 60 (1.120) AM (Cen,4, 80.00, Ar,8000.0,556.28,0.70); Sm (SG, 2x1.00); Cm (60:70)

07-Dec-2012  
10:45:32  
TOF MS ES+  
9.08e+003

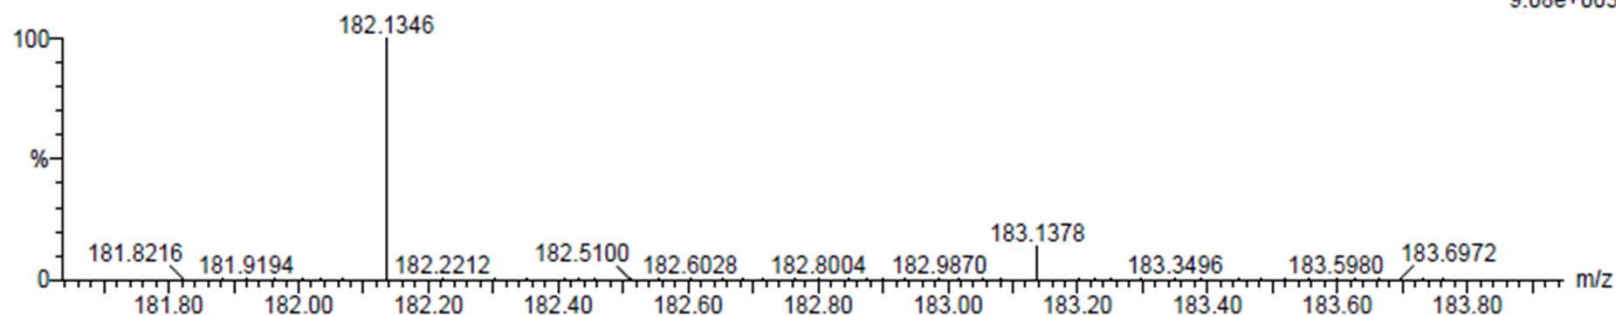

Minimum: -0.5  
Maximum: 5.0 5.0 25.0

| Mass     | Calc. Mass | mDa | PPM | DBE | i-FIT | Formula     |
|----------|------------|-----|-----|-----|-------|-------------|
| 182.1346 | 182.1345   | 0.1 | 0.5 | 3.5 | 3.1   | C11 H17 N F |

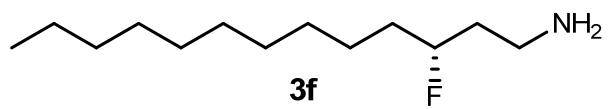

(*R*)-3-fluorotridecan-1-amine  
Solvent: MeOD  
400.13 MHz

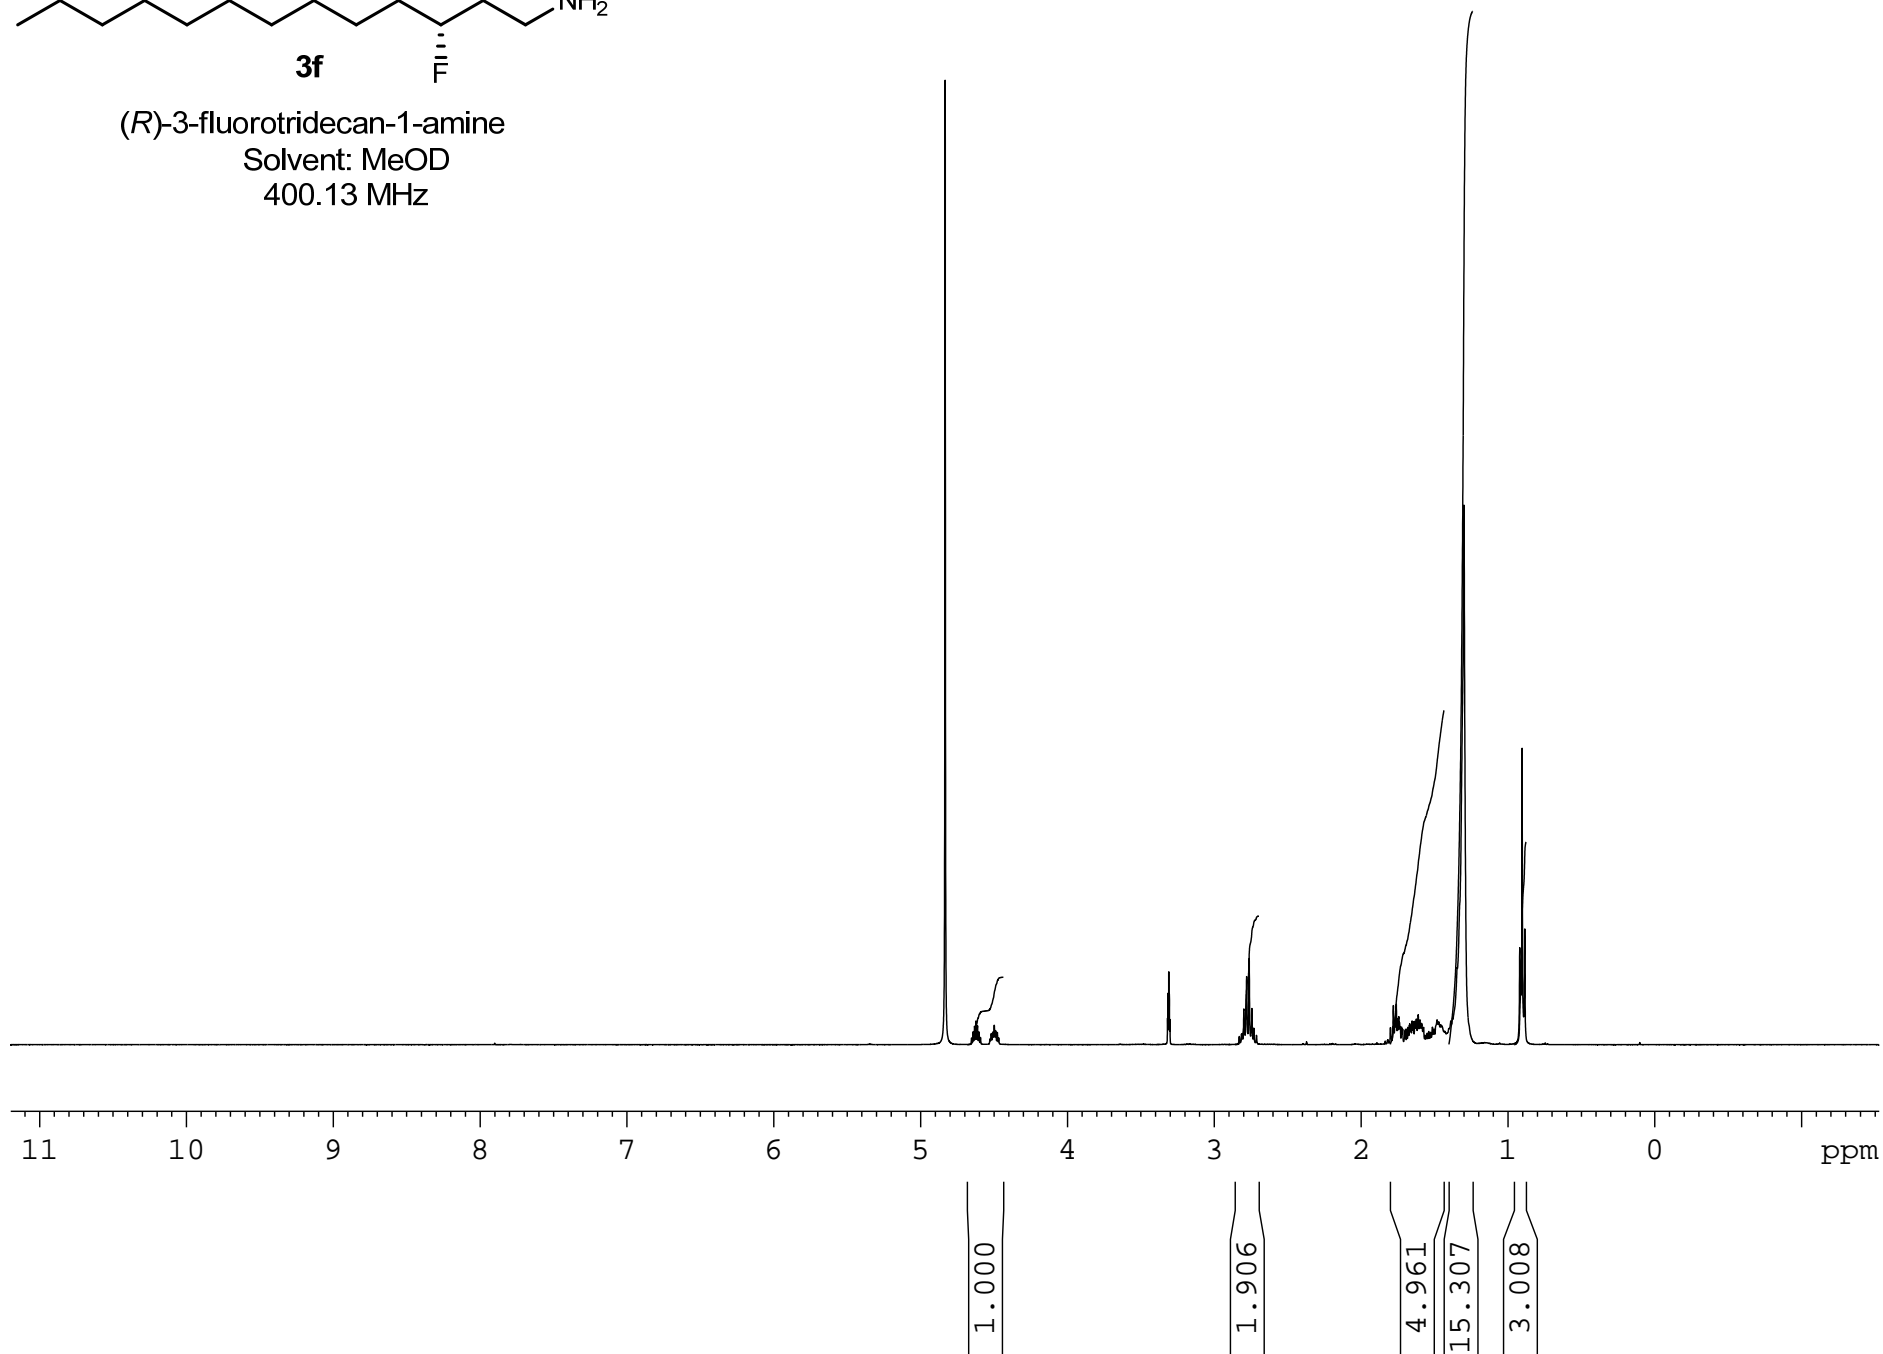

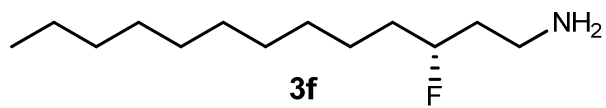

**3f**  
(*R*)-3-fluorotridecan-1-amine  
Solvent: MeOD  
100.6 MHz

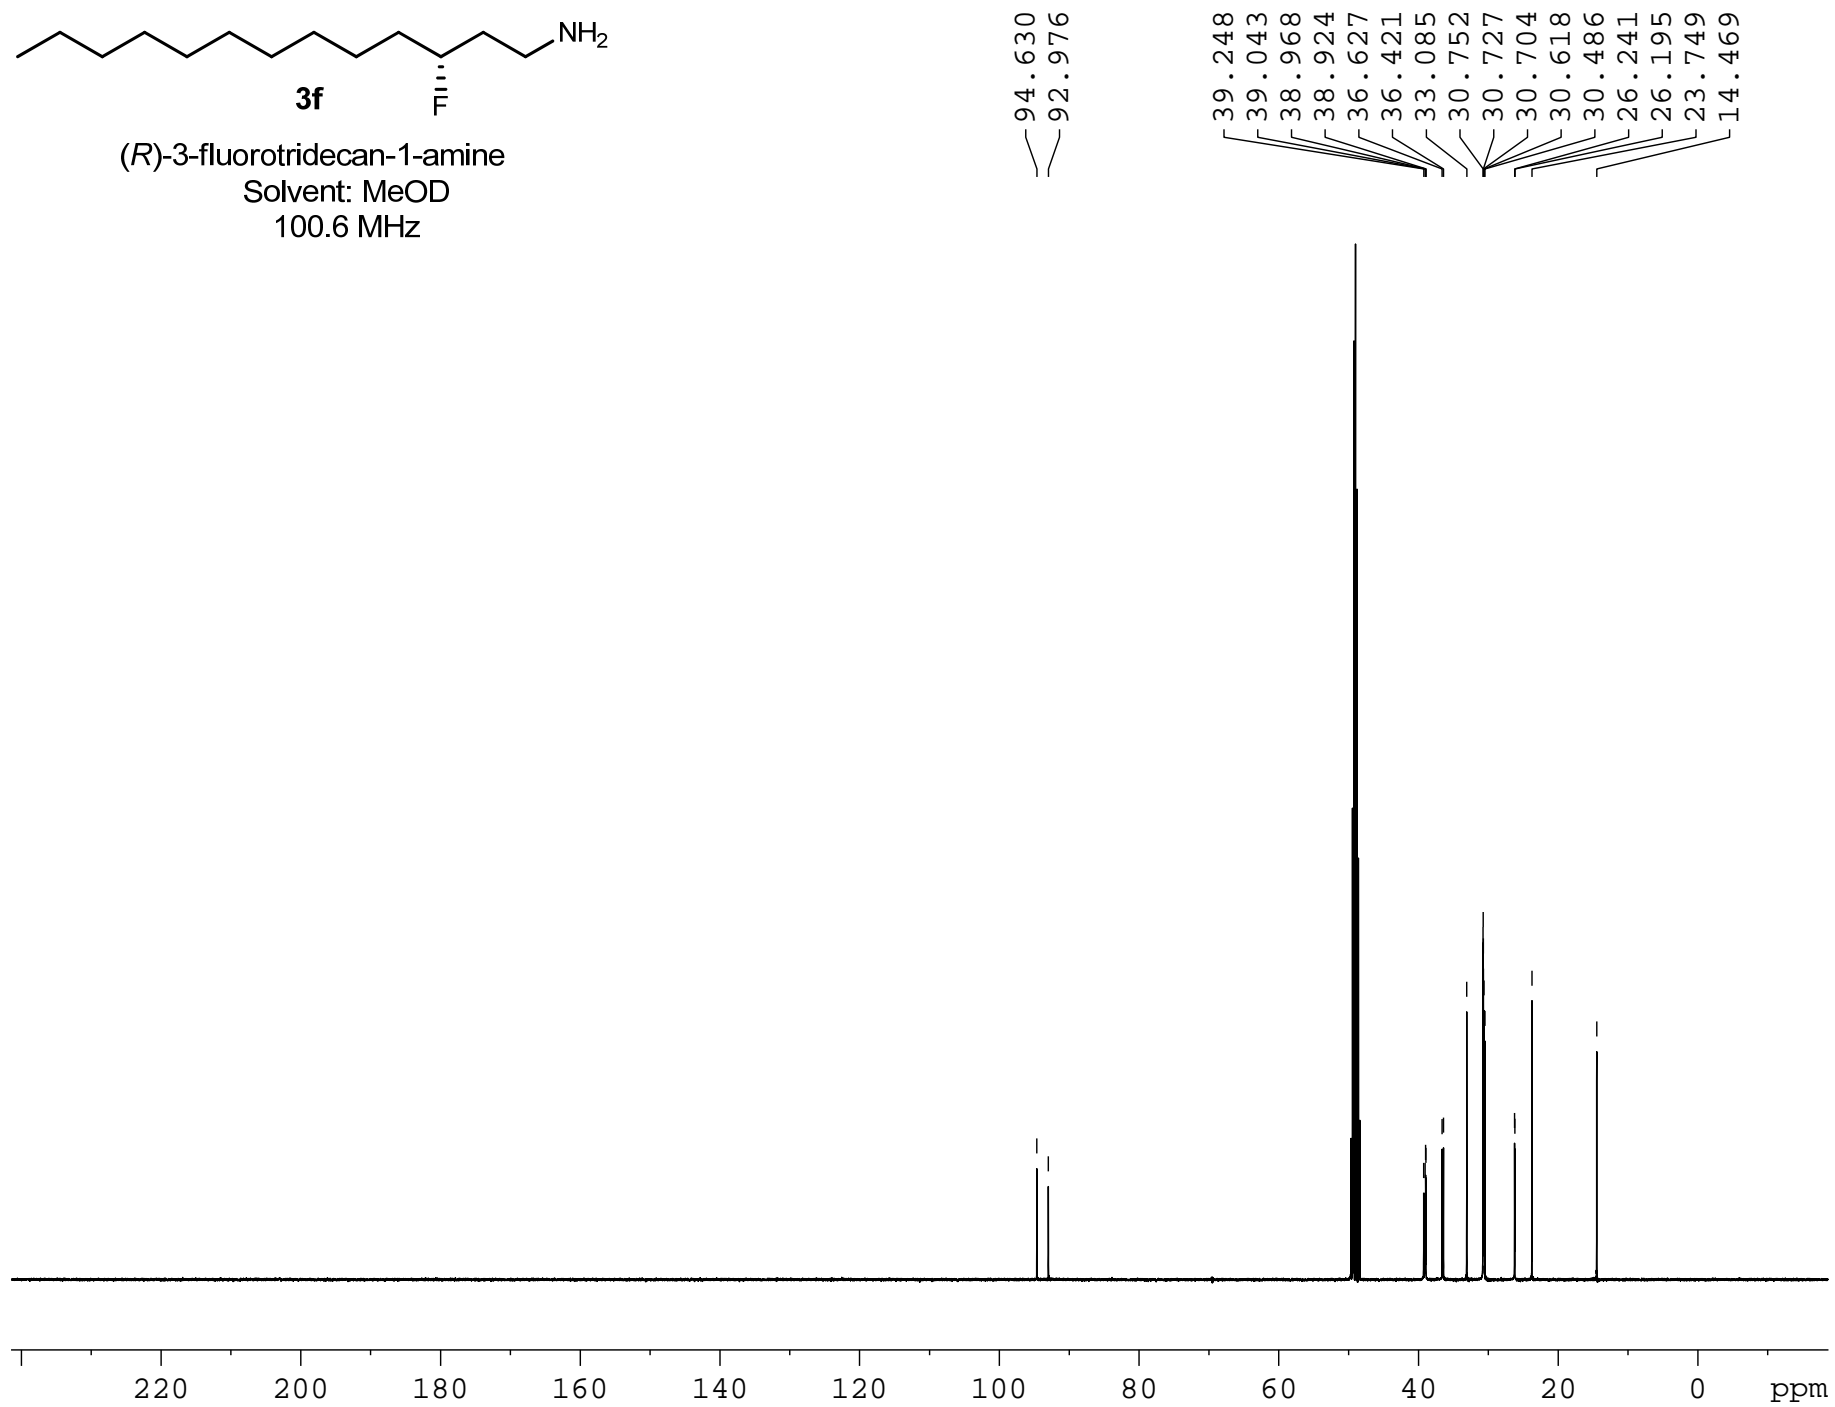

## Elemental Composition Report

Page 1

### Single Mass Analysis

Tolerance = 5.0 PPM / DBE: min = -0.5, max = 25.0

Element prediction: Off

Number of isotope peaks used for i-FIT = 2

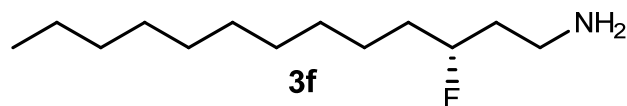

Monoisotopic Mass, Even Electron Ions

19 formula(e) evaluated with 1 results within limits (up to 50 best isotopic matches for each mass)

Elements Used:

C: 10-500 H: 10-1000 N: 1-200 F: 1-1

MCO-IV-158

S/N: UH193

MCO-IV-158\_120612\_001 74 (1.380) AM (Cen,4, 80.00, Ar,8000.0,556.28,0.70); Sm (SG, 2x1.00); Cm (70:80)

06-Dec-2012  
17:50:51  
TOF MS ES+  
8.10e+003

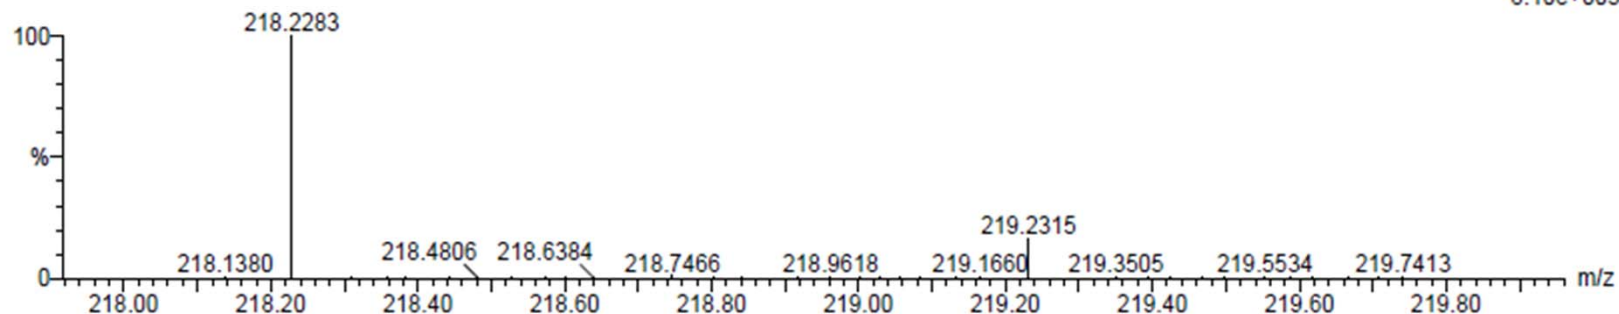

Minimum: -0.5  
Maximum: 5.0 5.0 25.0

| Mass     | Calc. Mass | mDa  | PPM  | DBE  | i-FIT | Formula     |
|----------|------------|------|------|------|-------|-------------|
| 218.2283 | 218.2284   | -0.1 | -0.5 | -0.5 | 2.1   | C13 H29 N F |



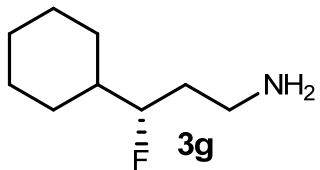

(S)-3-cyclohexyl-3-fluoropropan-1-amine

Solvent: MeOD

400.13 MHz

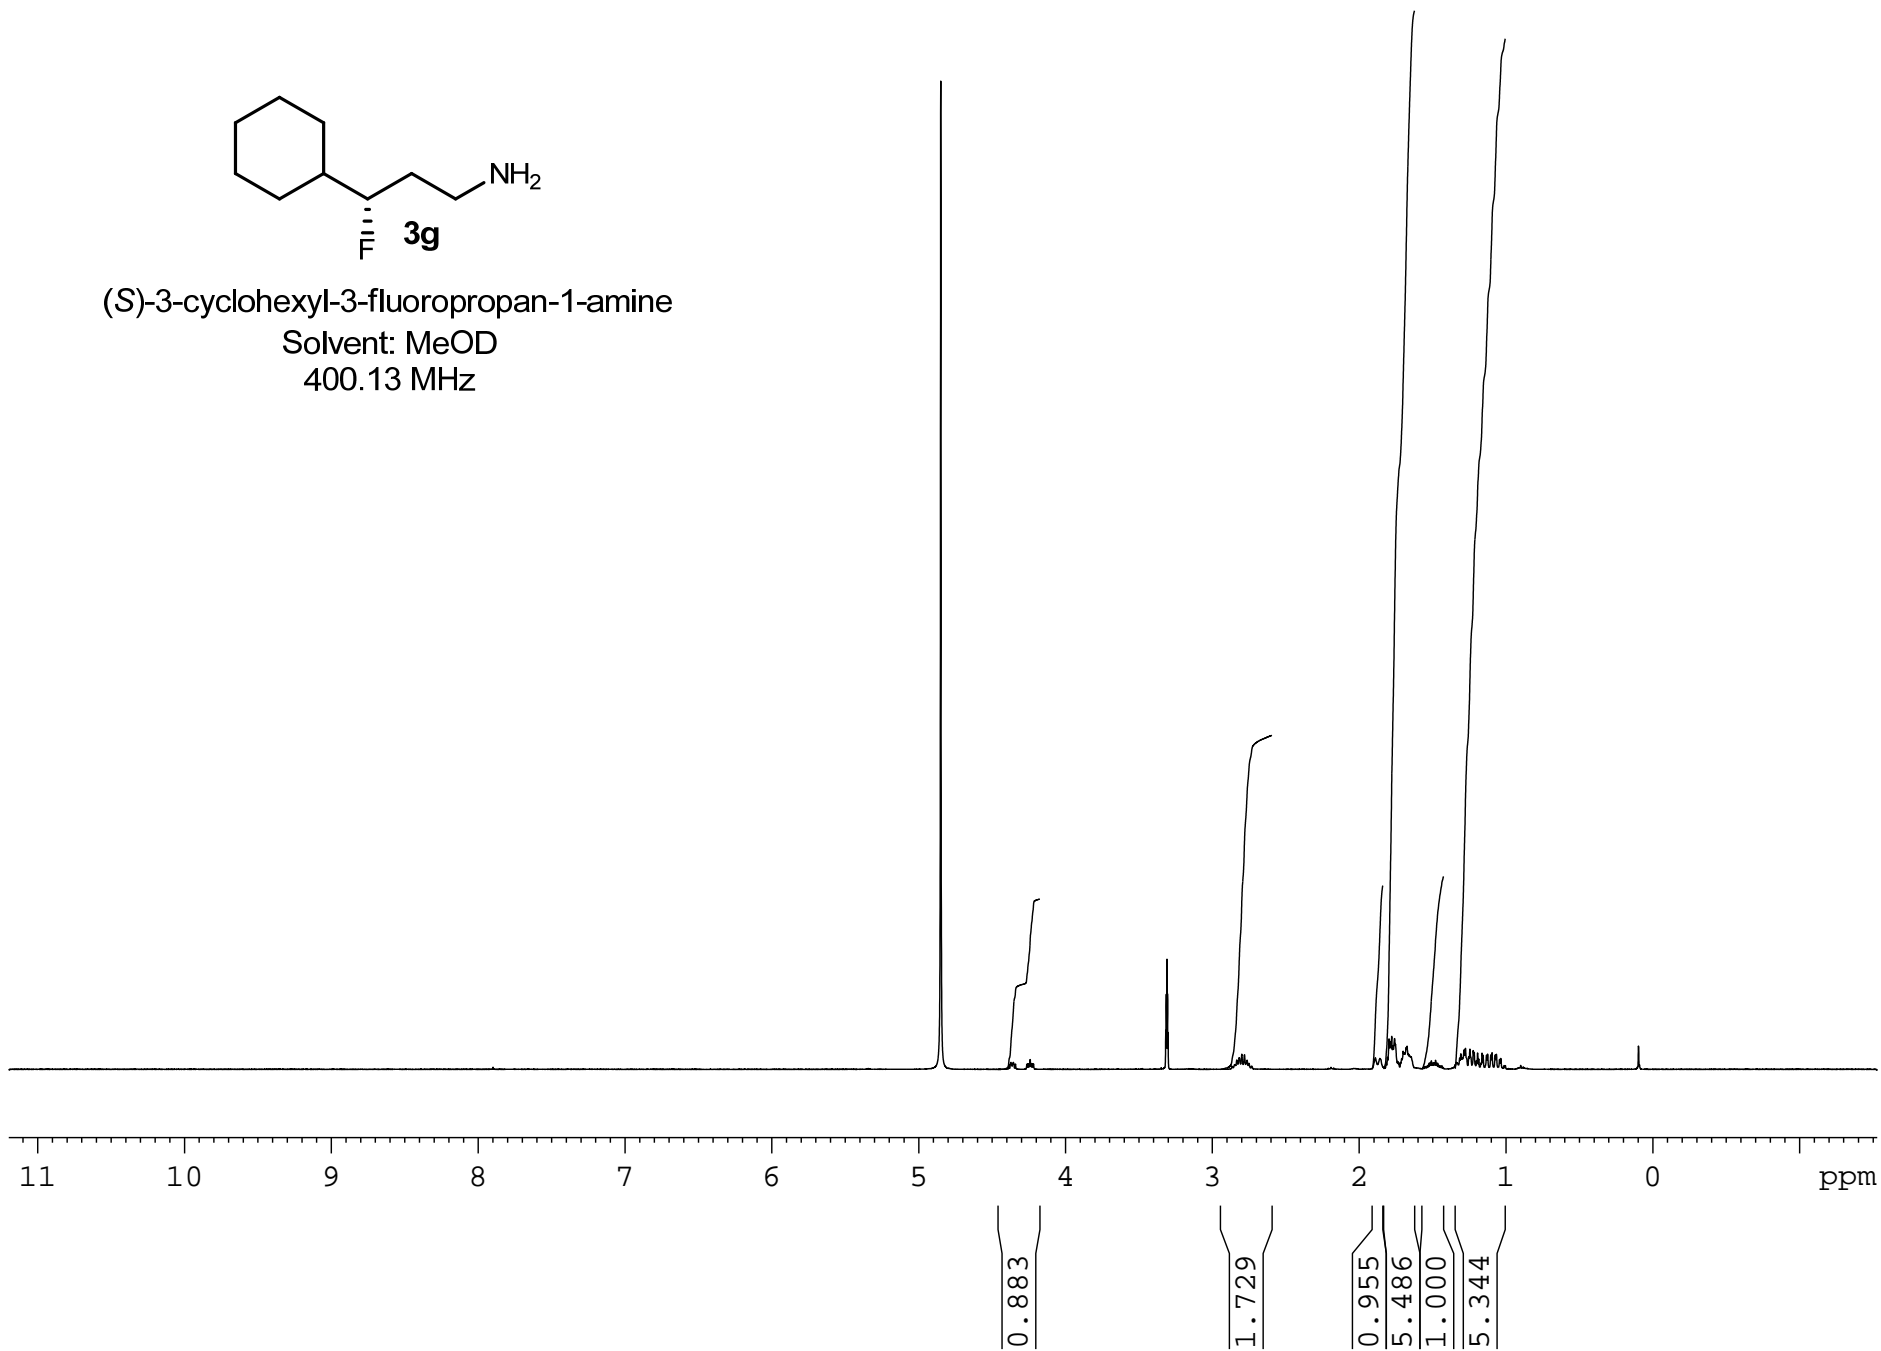

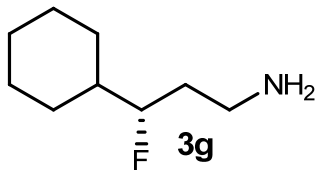

(S)-3-cyclohexyl-3-fluoropropan-1-amine

Solvent: MeOD

100 MHz

98.230  
96.553

43.704  
43.513  
39.118  
39.079  
35.838  
35.627  
29.704  
29.652  
28.745  
28.688  
27.470  
27.116  
26.935

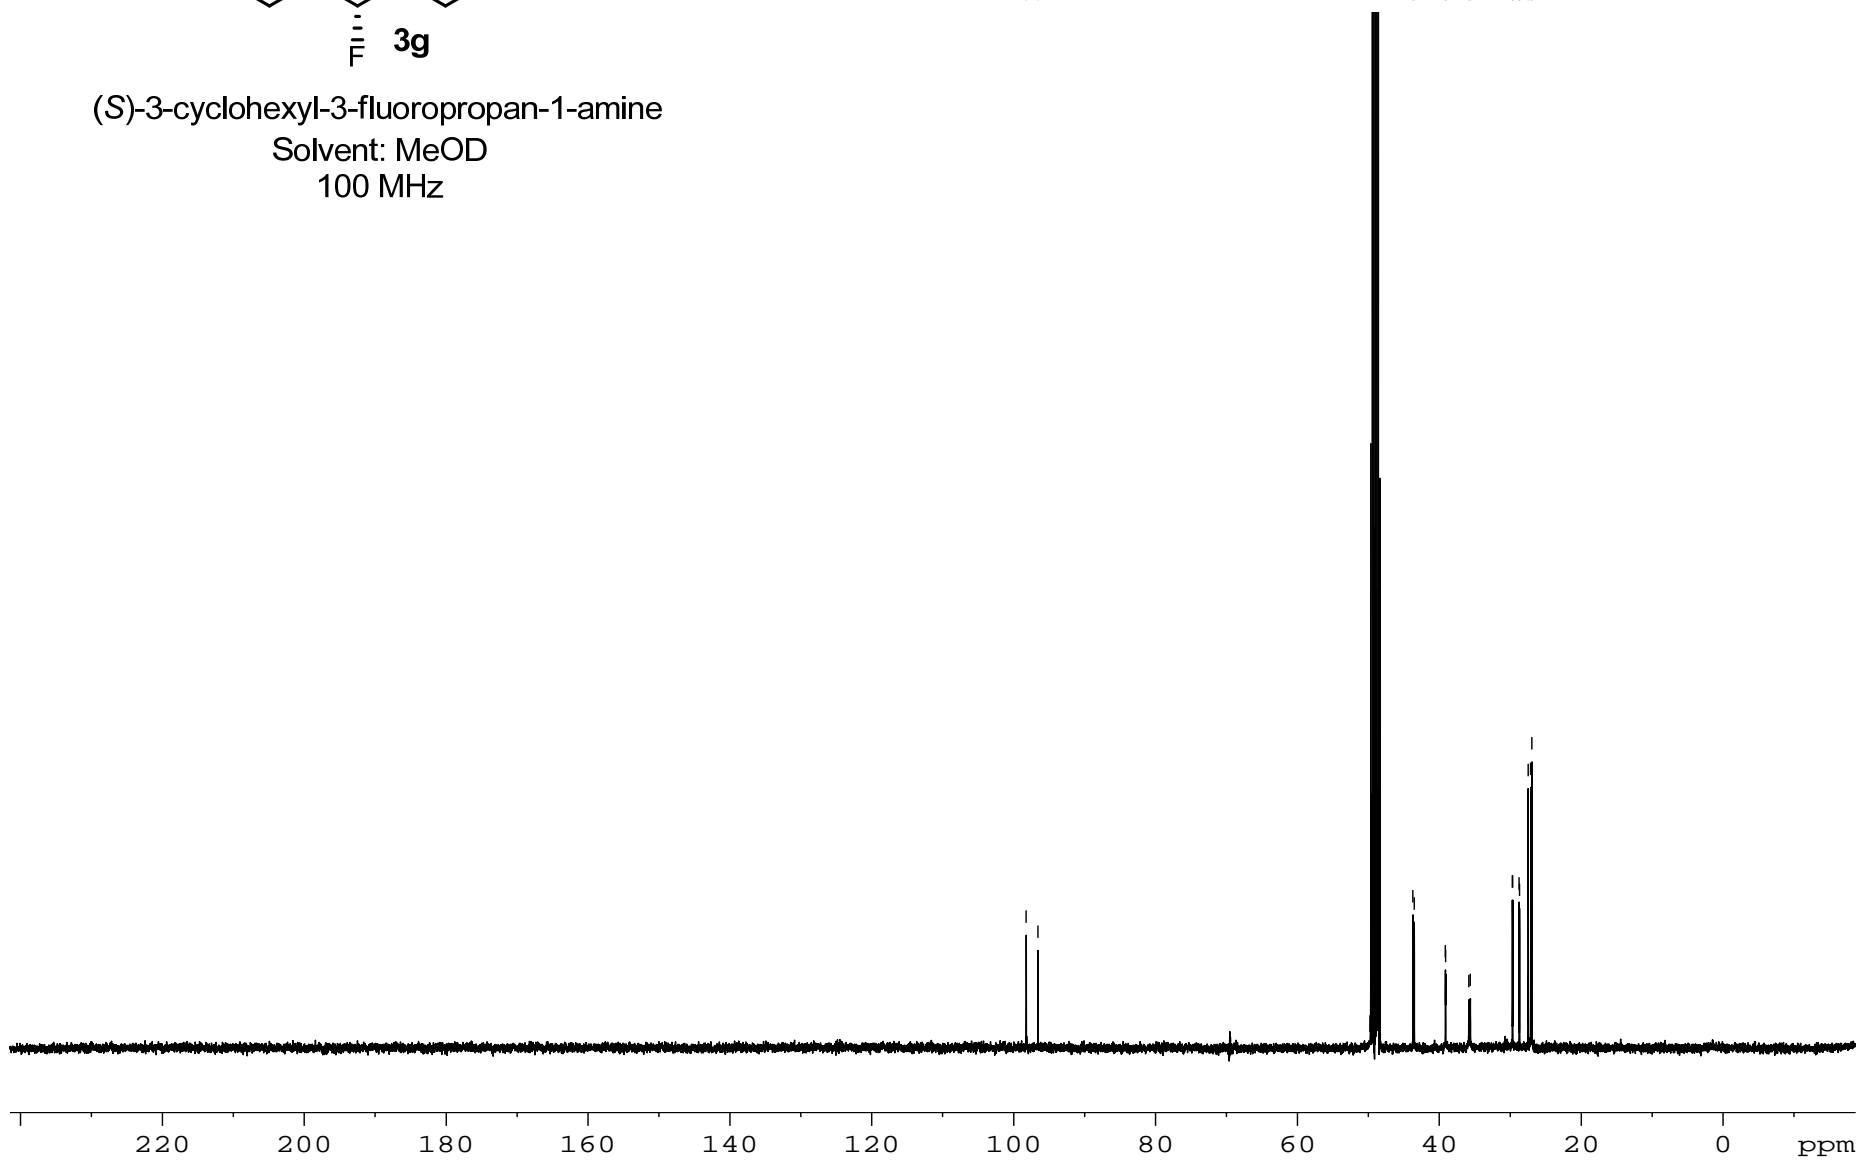

## Elemental Composition Report

### Single Mass Analysis

Tolerance = 5.0 PPM / DBE: min = -0.5, max = 25.0

Element prediction: Off

Number of isotope peaks used for i-FIT = 2

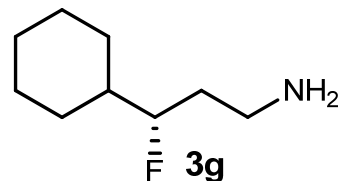

Page 1

Monoisotopic Mass, Even Electron Ions

10 formula(e) evaluated with 1 results within limits (up to 50 best isotopic matches for each mass)

Elements Used:

C: 8-500 H: 10-1000 N: 1-200 F: 1-1

MCO-IV-162

S/N: UH193

MCO-IV-162\_120712\_001 70 (1.306) AM (Cen,4, 80.00, Ar,8000.0,556.28,0.70); Sm (SG, 2x1.00); Cm (60:70)

07-Dec-2012  
09:51:53  
TOF MS ES+  
9.28e+003

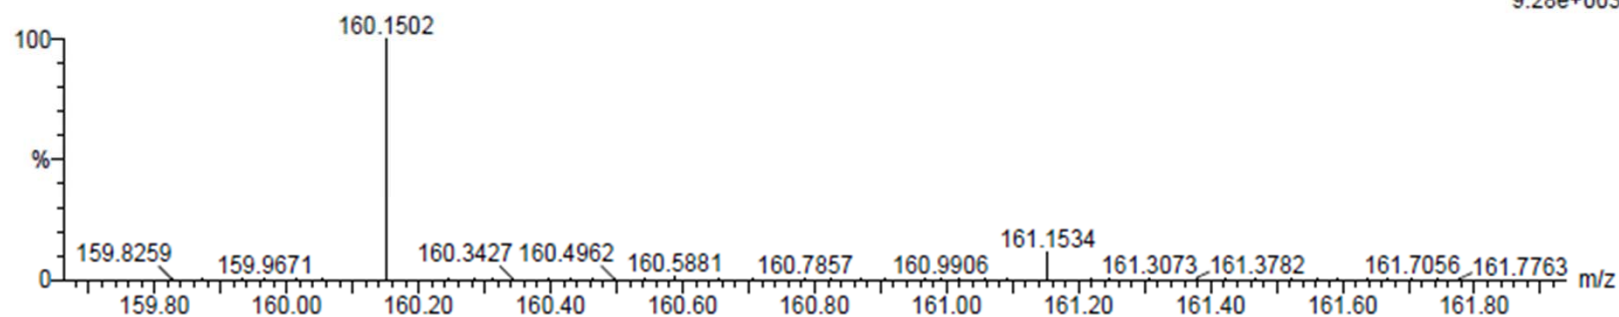

Minimum: -0.5  
Maximum: 5.0 5.0 25.0

| Mass     | Calc. Mass | mDa | PPM | DBE | i-FIT | Formula    |
|----------|------------|-----|-----|-----|-------|------------|
| 160.1502 | 160.1502   | 0.0 | 0.0 | 0.5 | 3.2   | C9 H19 N F |

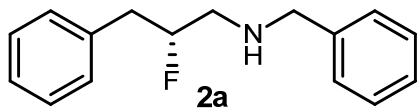

(*R*)-*N*-benzyl-2-fluoro-3-phenylpropan-1-amine

Solvent: CDCl<sub>3</sub>

400.13 MHz

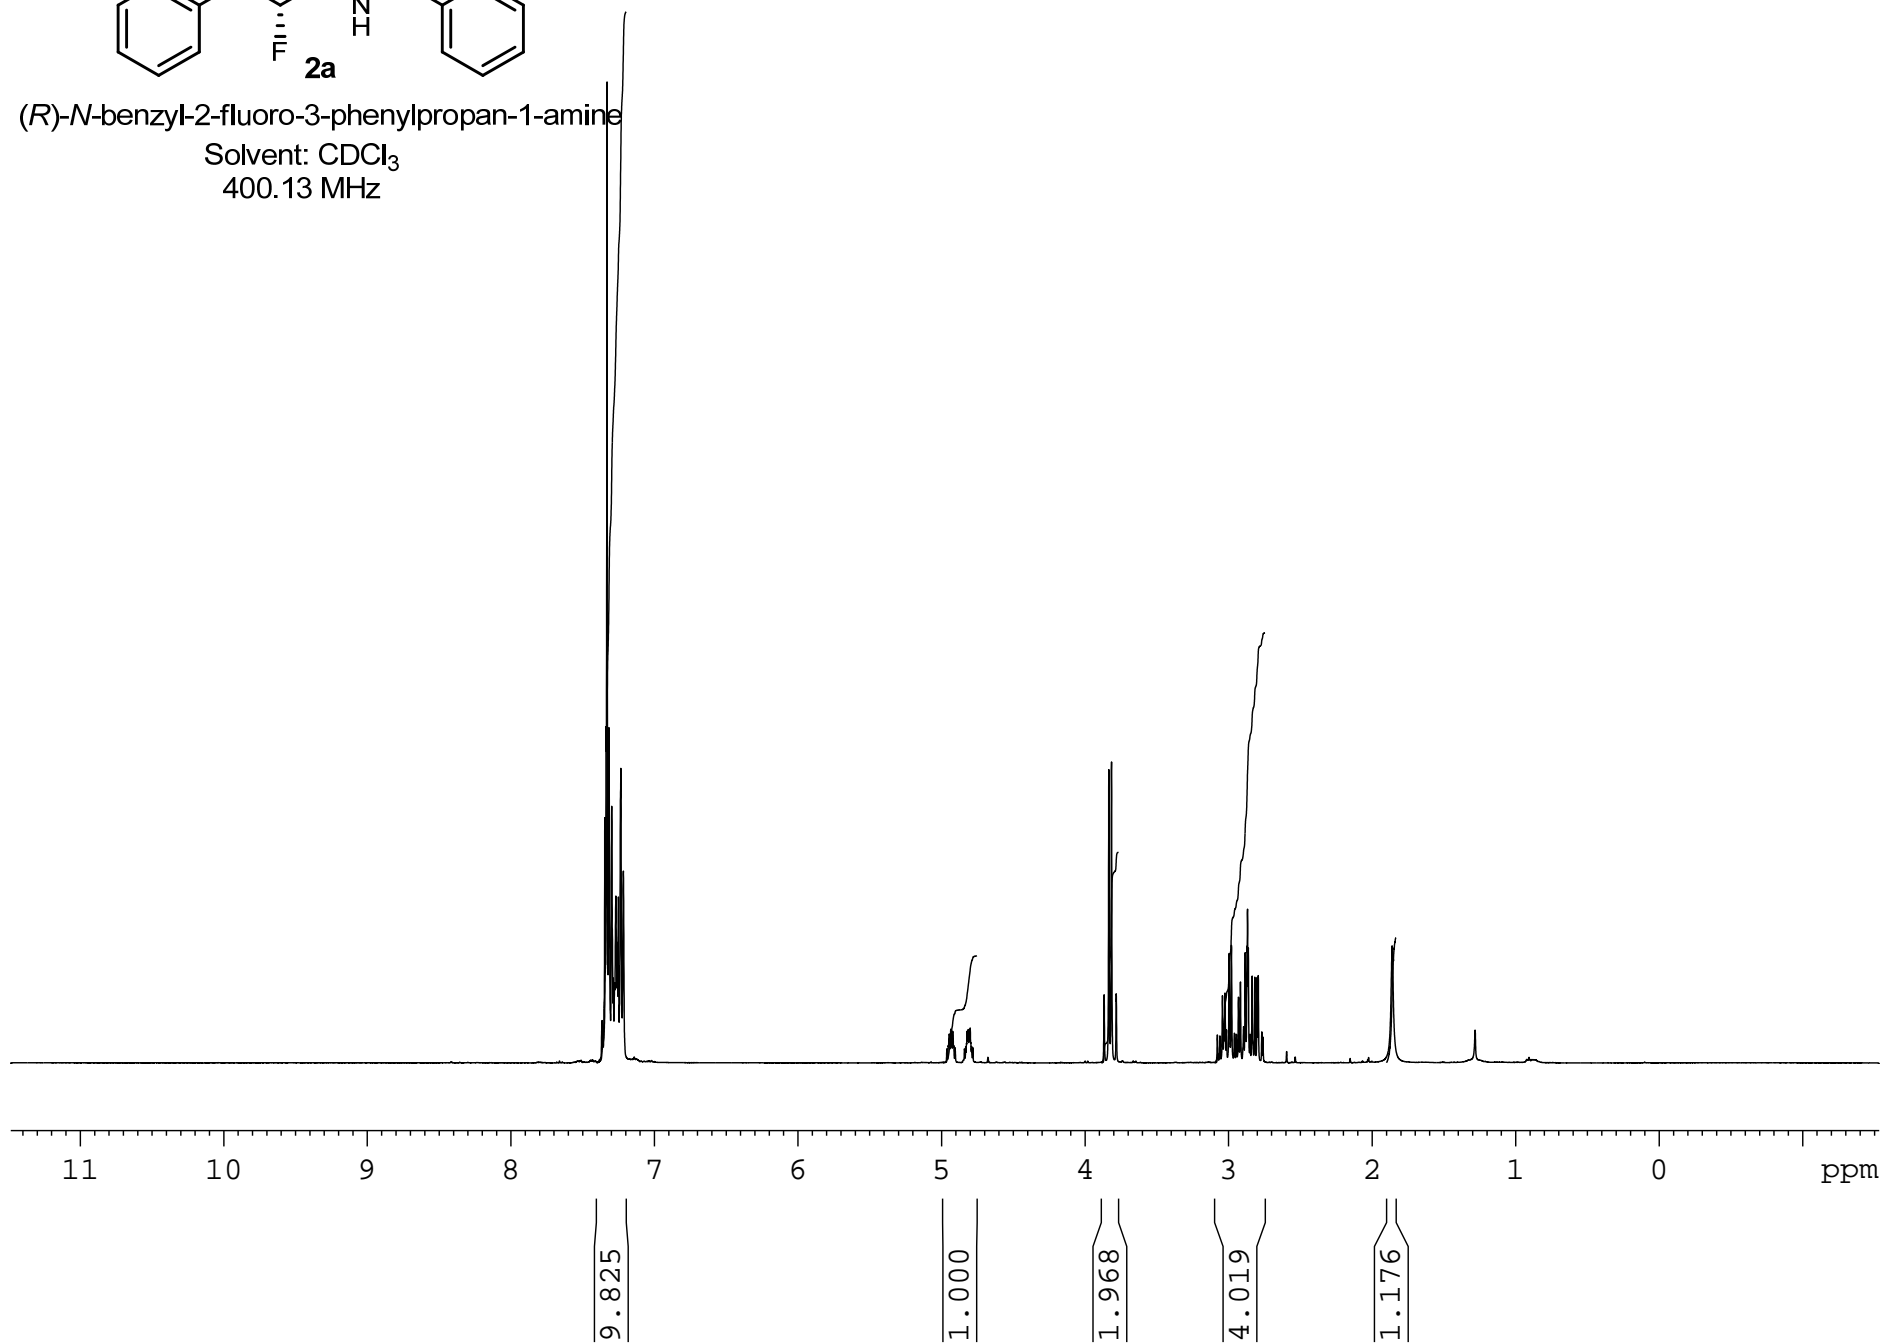

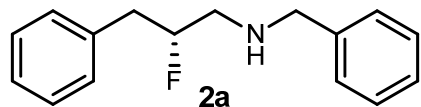

(*R*)-*N*-benzyl-2-fluoro-3-phenylpropan-1-amine

Solvent: CDCl<sub>3</sub>  
100.6 MHz

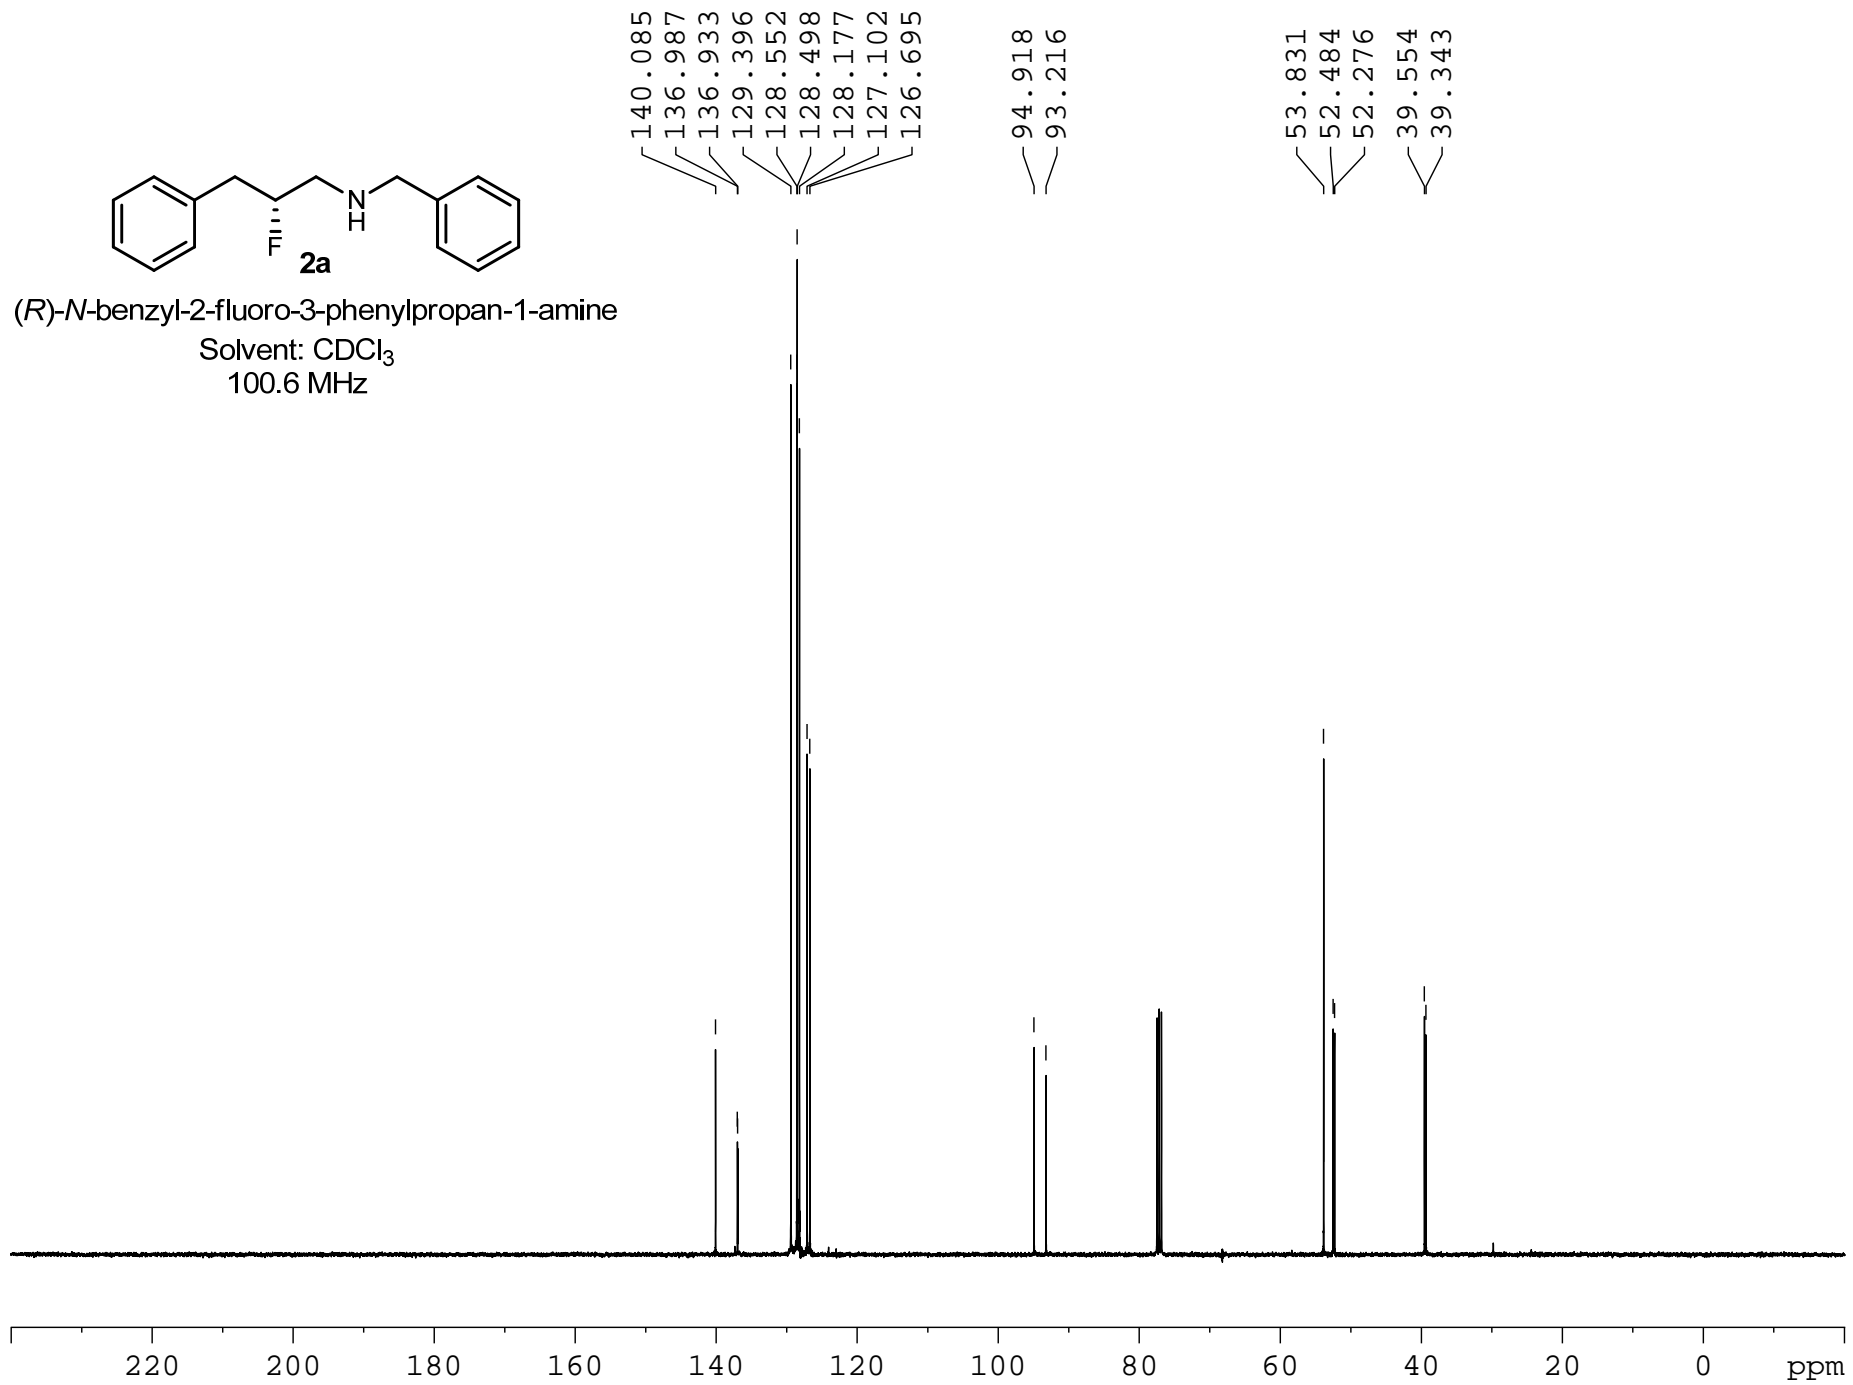

## Elemental Composition Report

Page 1

### Single Mass Analysis

Tolerance = 5.0 PPM / DBE: min = -0.5, max = 25.0

Element prediction: Off

Number of isotope peaks used for i-FIT = 2

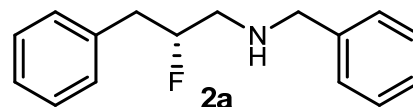

Monoisotopic Mass, Even Electron Ions

25 formula(e) evaluated with 1 results within limits (up to 50 best isotopic matches for each mass)

Elements Used:

C: 10-500 H: 10-1000 N: 1-200 F: 1-1

MCO-V-20

S/N: UH193

MCO-V-20\_120712\_001 50 (0.935) AM (Cen,4, 80.00, Ar,8000.0,556.28,0.70); Sm (SG, 2x1.00); Cm (50:60)

07-Dec-2012  
12:03:38  
TOF MS ES+  
1.18e+004

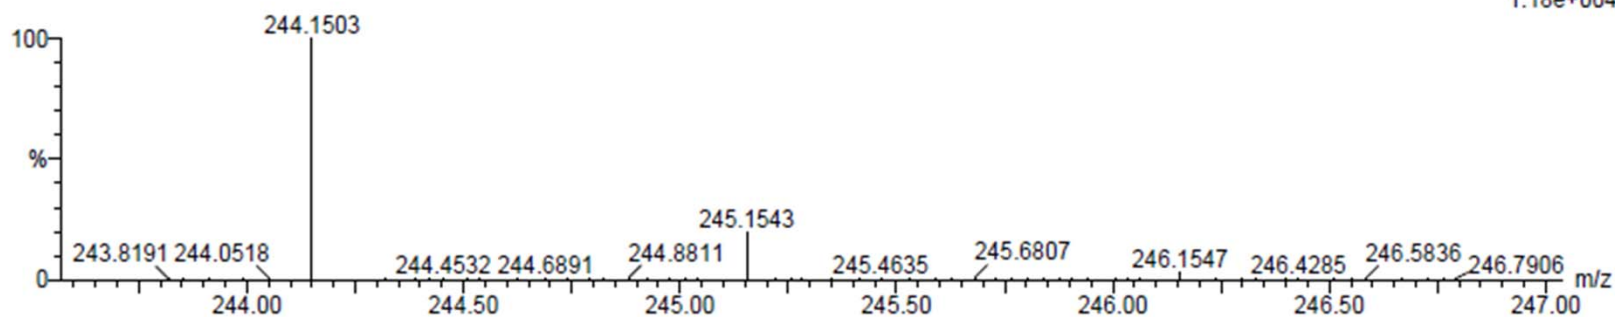

Minimum: -0.5  
Maximum: 5.0 5.0 25.0

| Mass     | Calc. Mass | mDa | PPM | DBE | i-FIT | Formula     |
|----------|------------|-----|-----|-----|-------|-------------|
| 244.1503 | 244.1502   | 0.1 | 0.4 | 7.5 | 1.9   | C16 H19 N F |

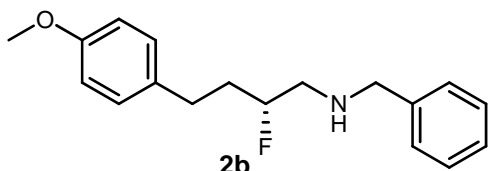

(*R*)-*N*-benzyl-2-fluoro-4-(4-methoxyphenyl)butan-1-amine

Solvent: CDCl<sub>3</sub>

400.13 MHz

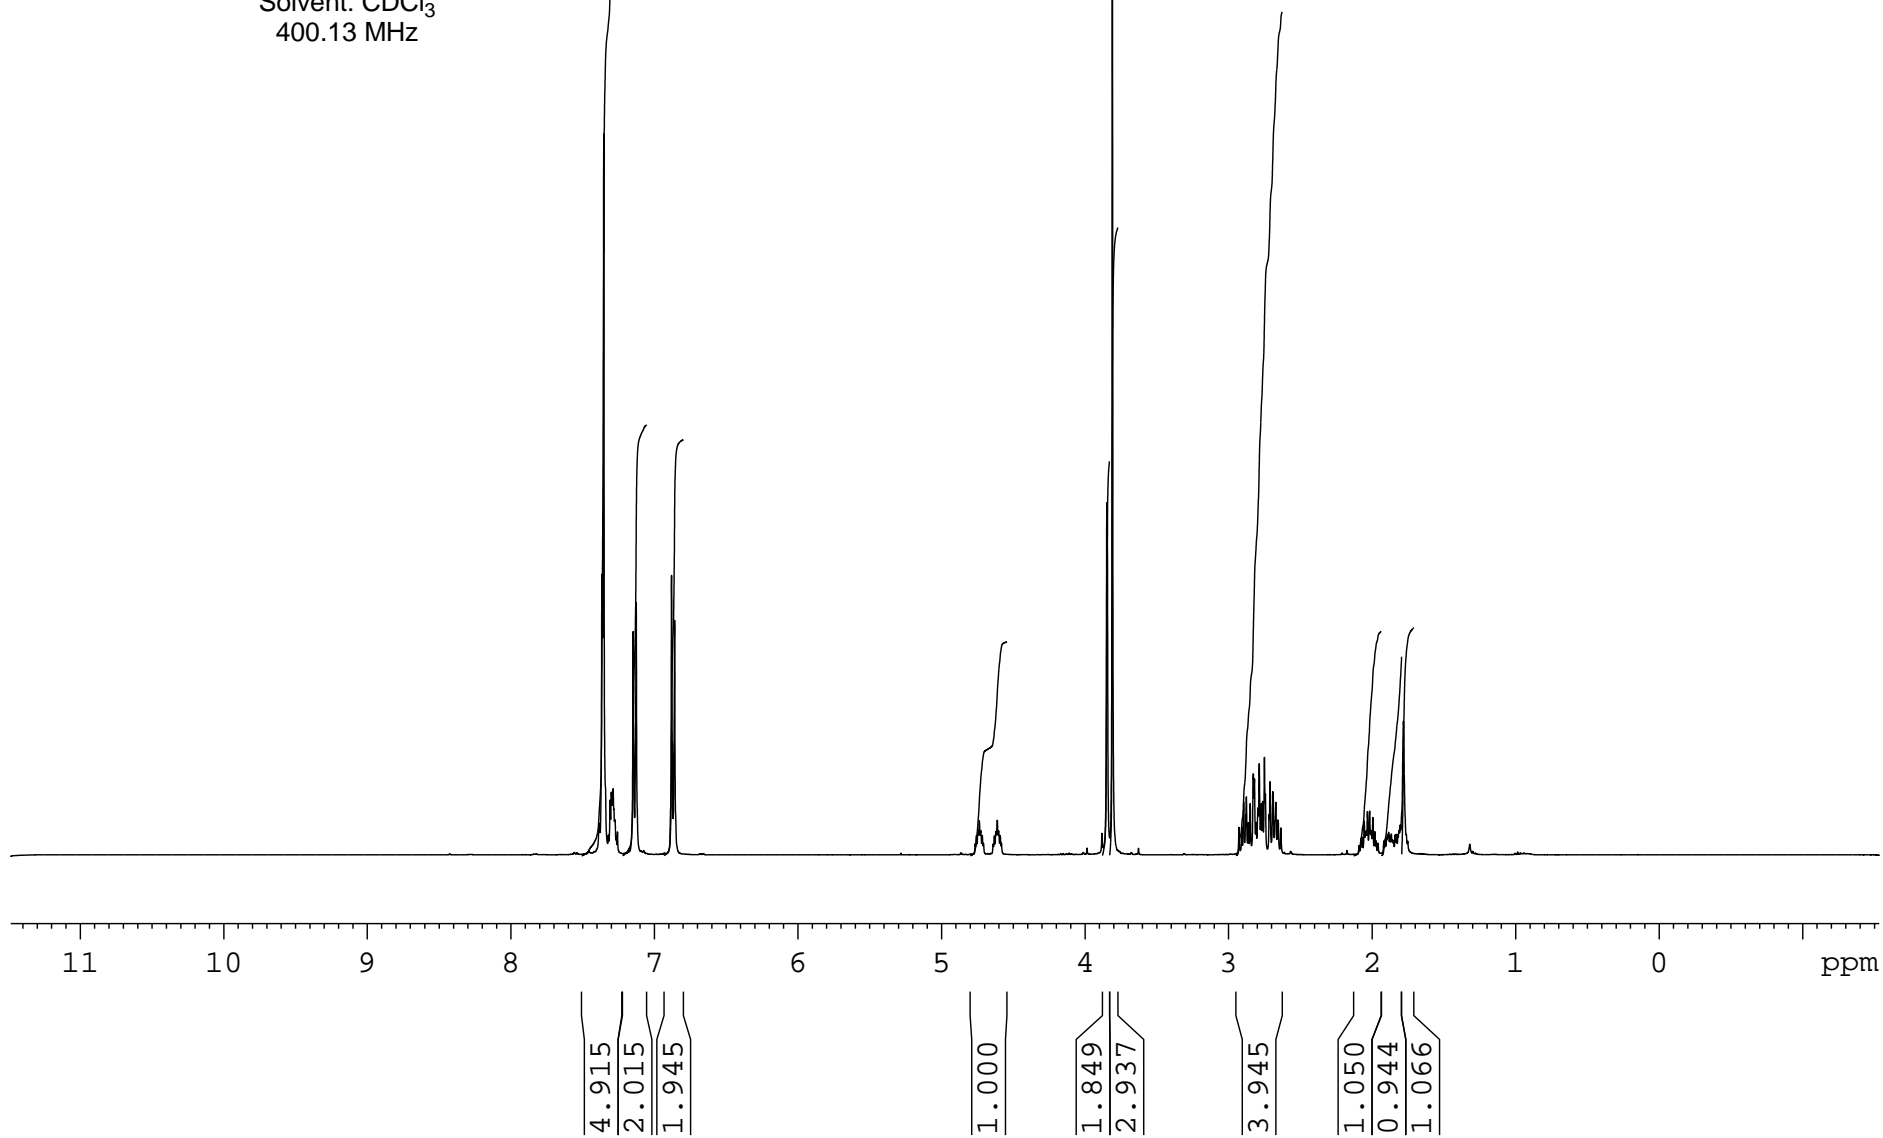

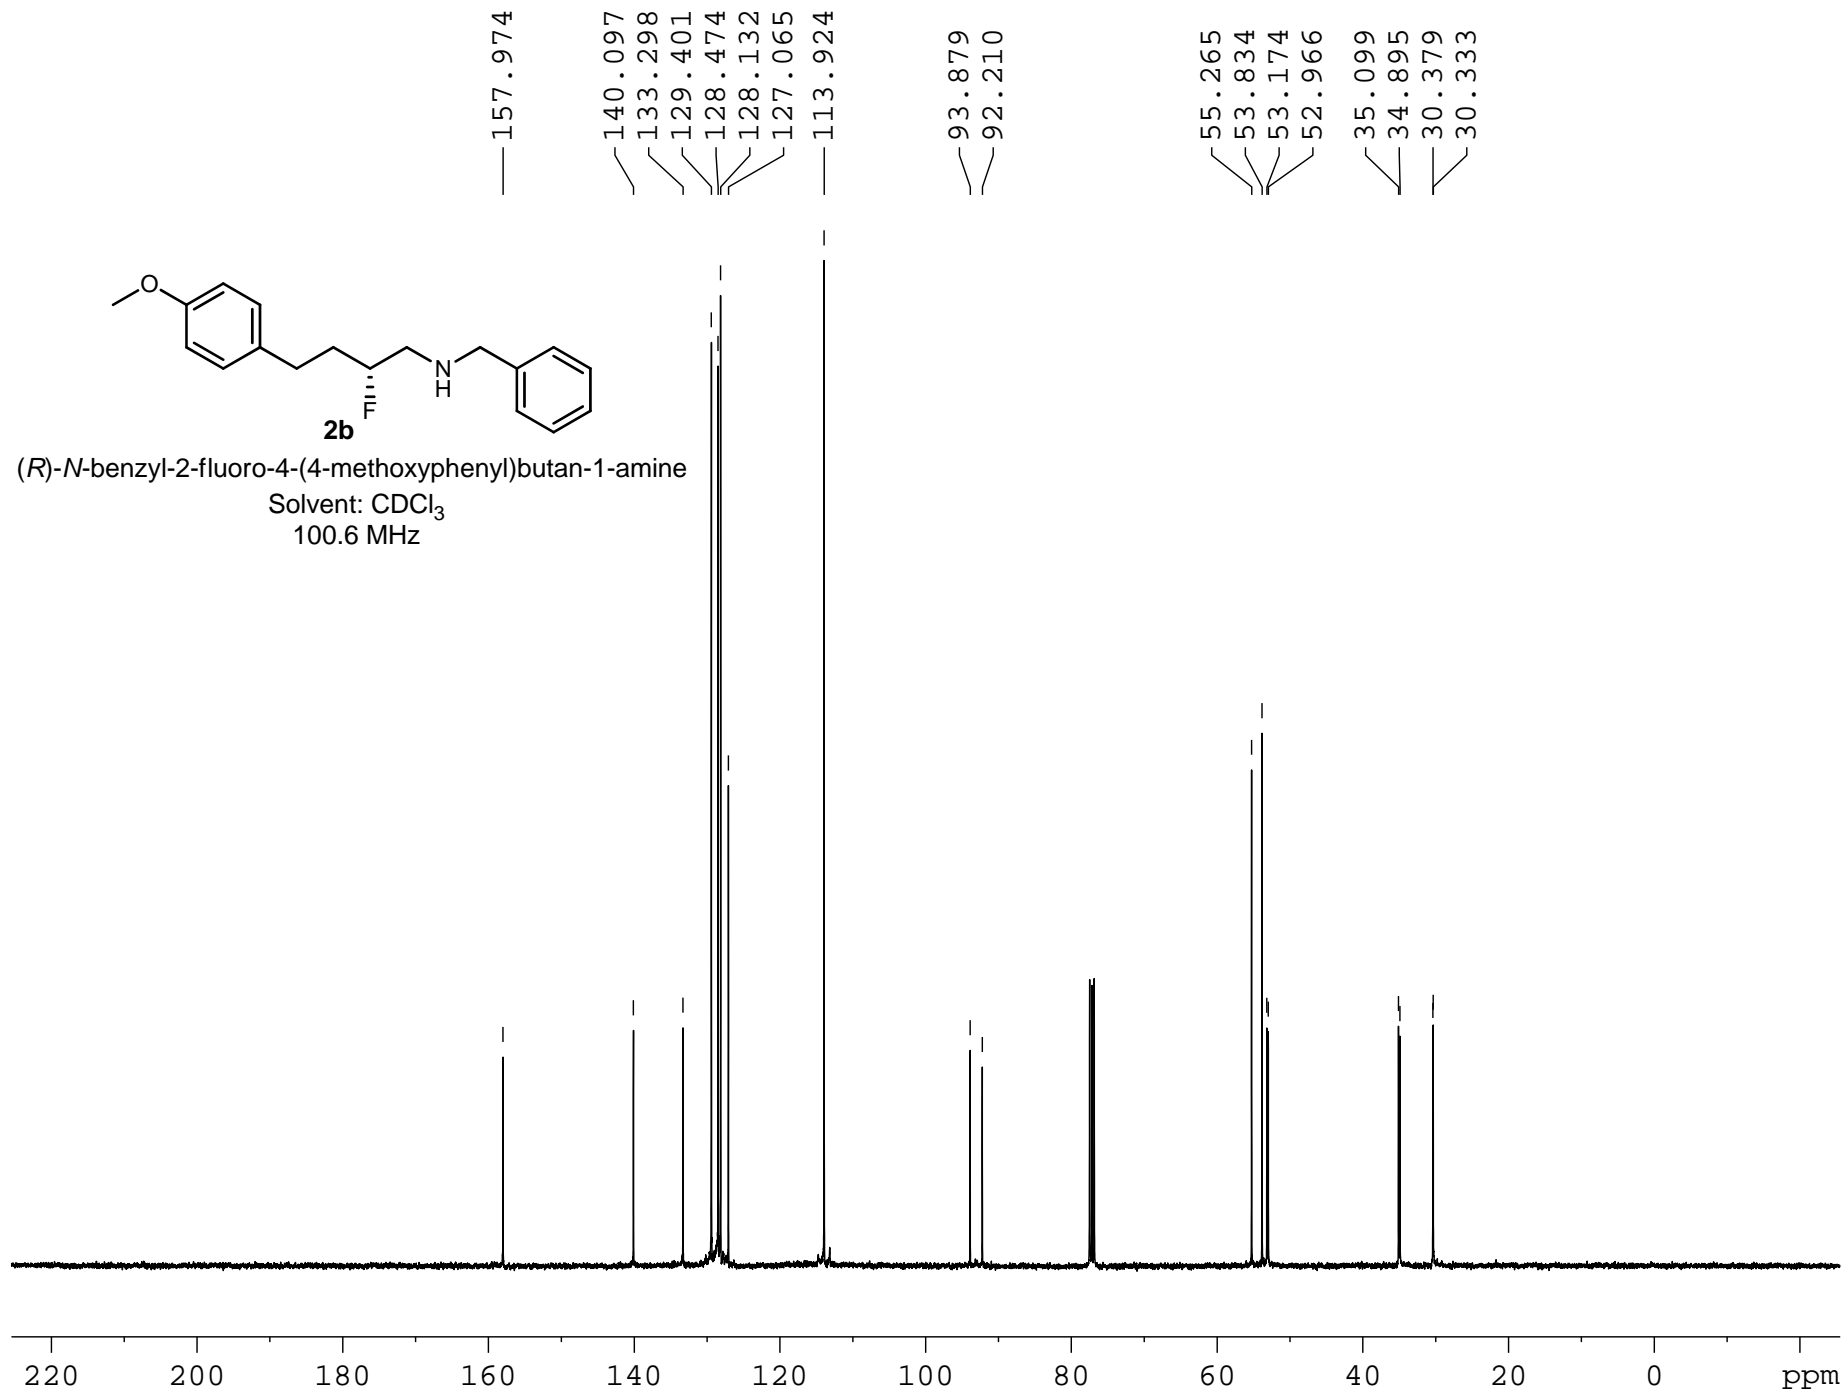



## Elemental Composition Report

### Single Mass Analysis

Tolerance = 5.0 PPM / DBE: min = -0.5, max = 25.0  
 Element prediction: Off  
 Number of isotope peaks used for i-FIT = 2

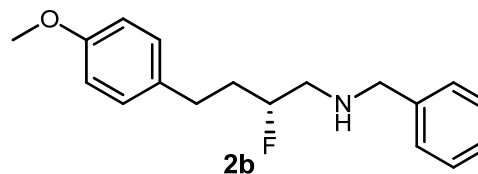

Page 1

Monoisotopic Mass, Even Electron Ions

149 formula(e) evaluated with 1 results within limits (up to 50 best isotopic matches for each mass)

Elements Used:

C: 15-500 H: 10-1000 N: 1-200 O: 1-200 F: 1-1

MCO-V-25

S/N: UH193

MCO-V-25\_120712\_001 98 (1.825) AM (Cen,4, 80.00, Ar,8000.0,556.28,0.70); Sm (SG, 2x1.00); Cm (90:100)

07-Dec-2012  
 12:48:33  
 TOF MS ES+  
 1.46e+004

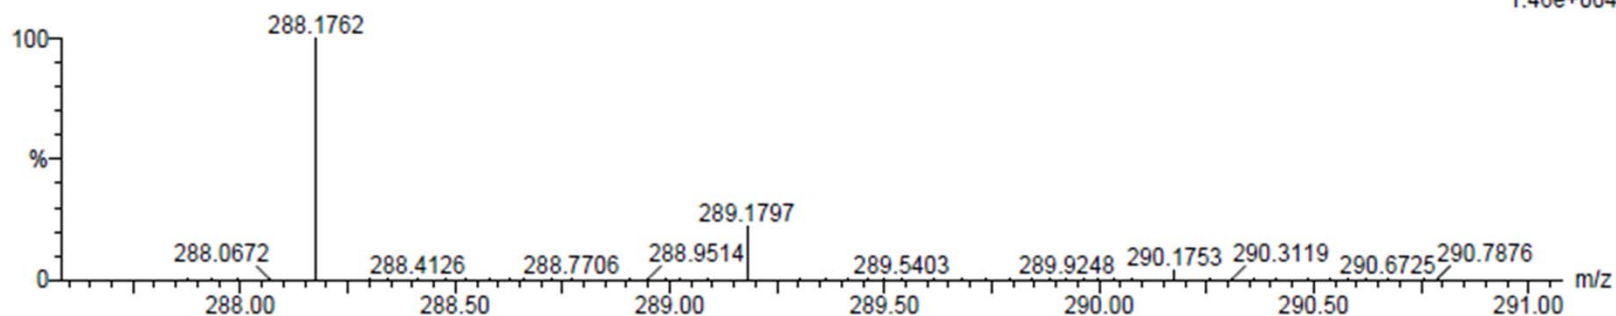

Minimum: -0.5  
 Maximum: 5.0 5.0 25.0

| Mass     | Calc. Mass | mDa  | PPM  | DBE | i-FIT | Formula       |
|----------|------------|------|------|-----|-------|---------------|
| 288.1762 | 288.1764   | -0.2 | -0.7 | 7.5 | 4.2   | C18 H23 N O F |

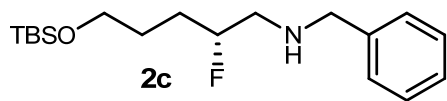

(*R*)-*N*-benzyl-5-((*tert*-butyldimethylsilyl)oxy)-2-fluoropentan-1-amine

Solvent: CDCl<sub>3</sub>

400.13 MHz

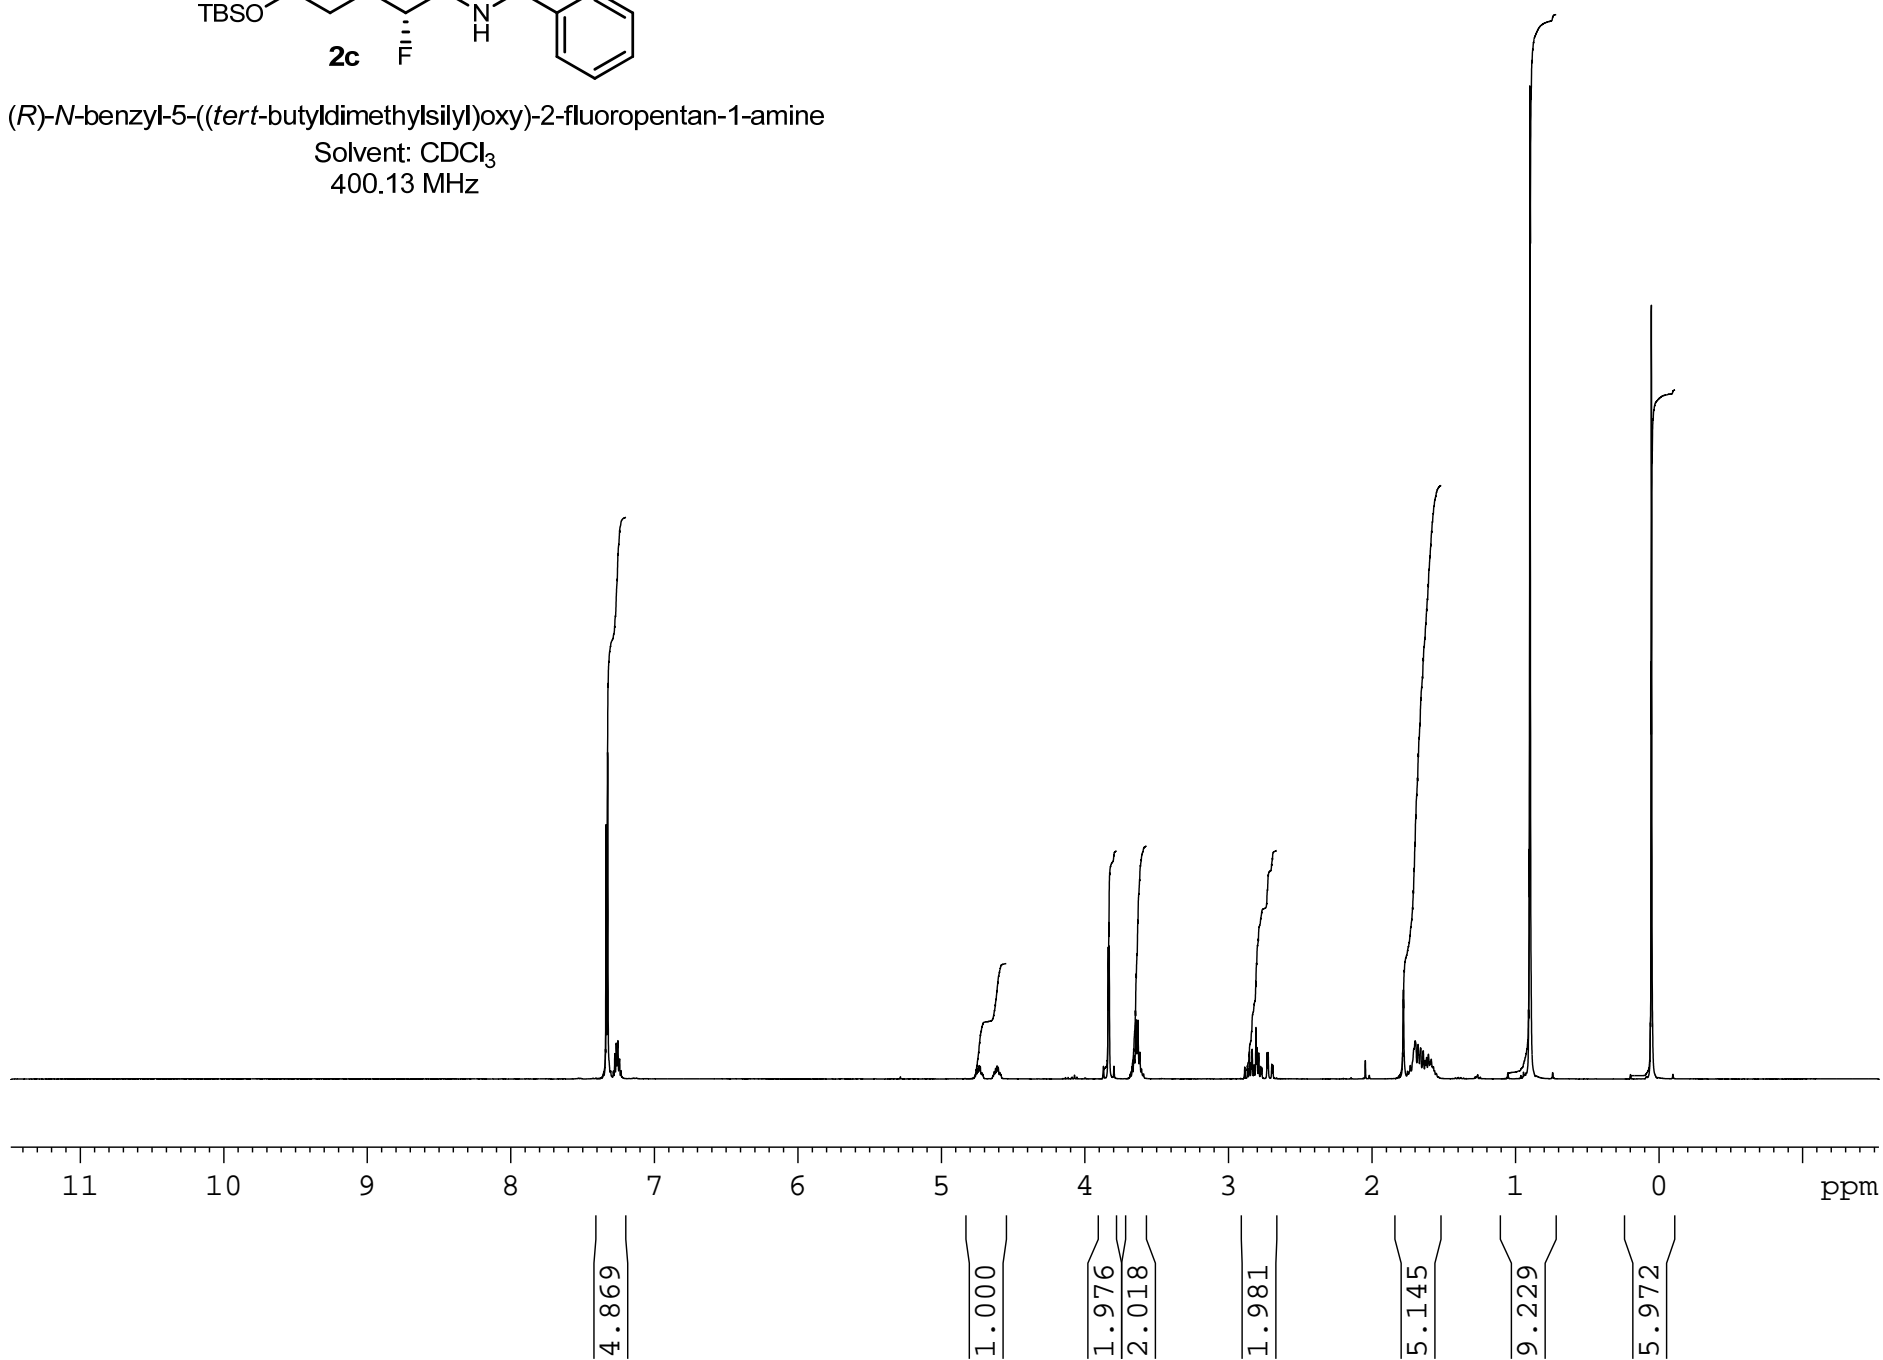

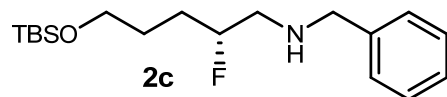

(*R*)-*N*-benzyl-5-((*tert*-butyldimethylsilyl)oxy)-2-fluoropentan-1-amine

Solvent: CDCl<sub>3</sub>  
100.6 MHz

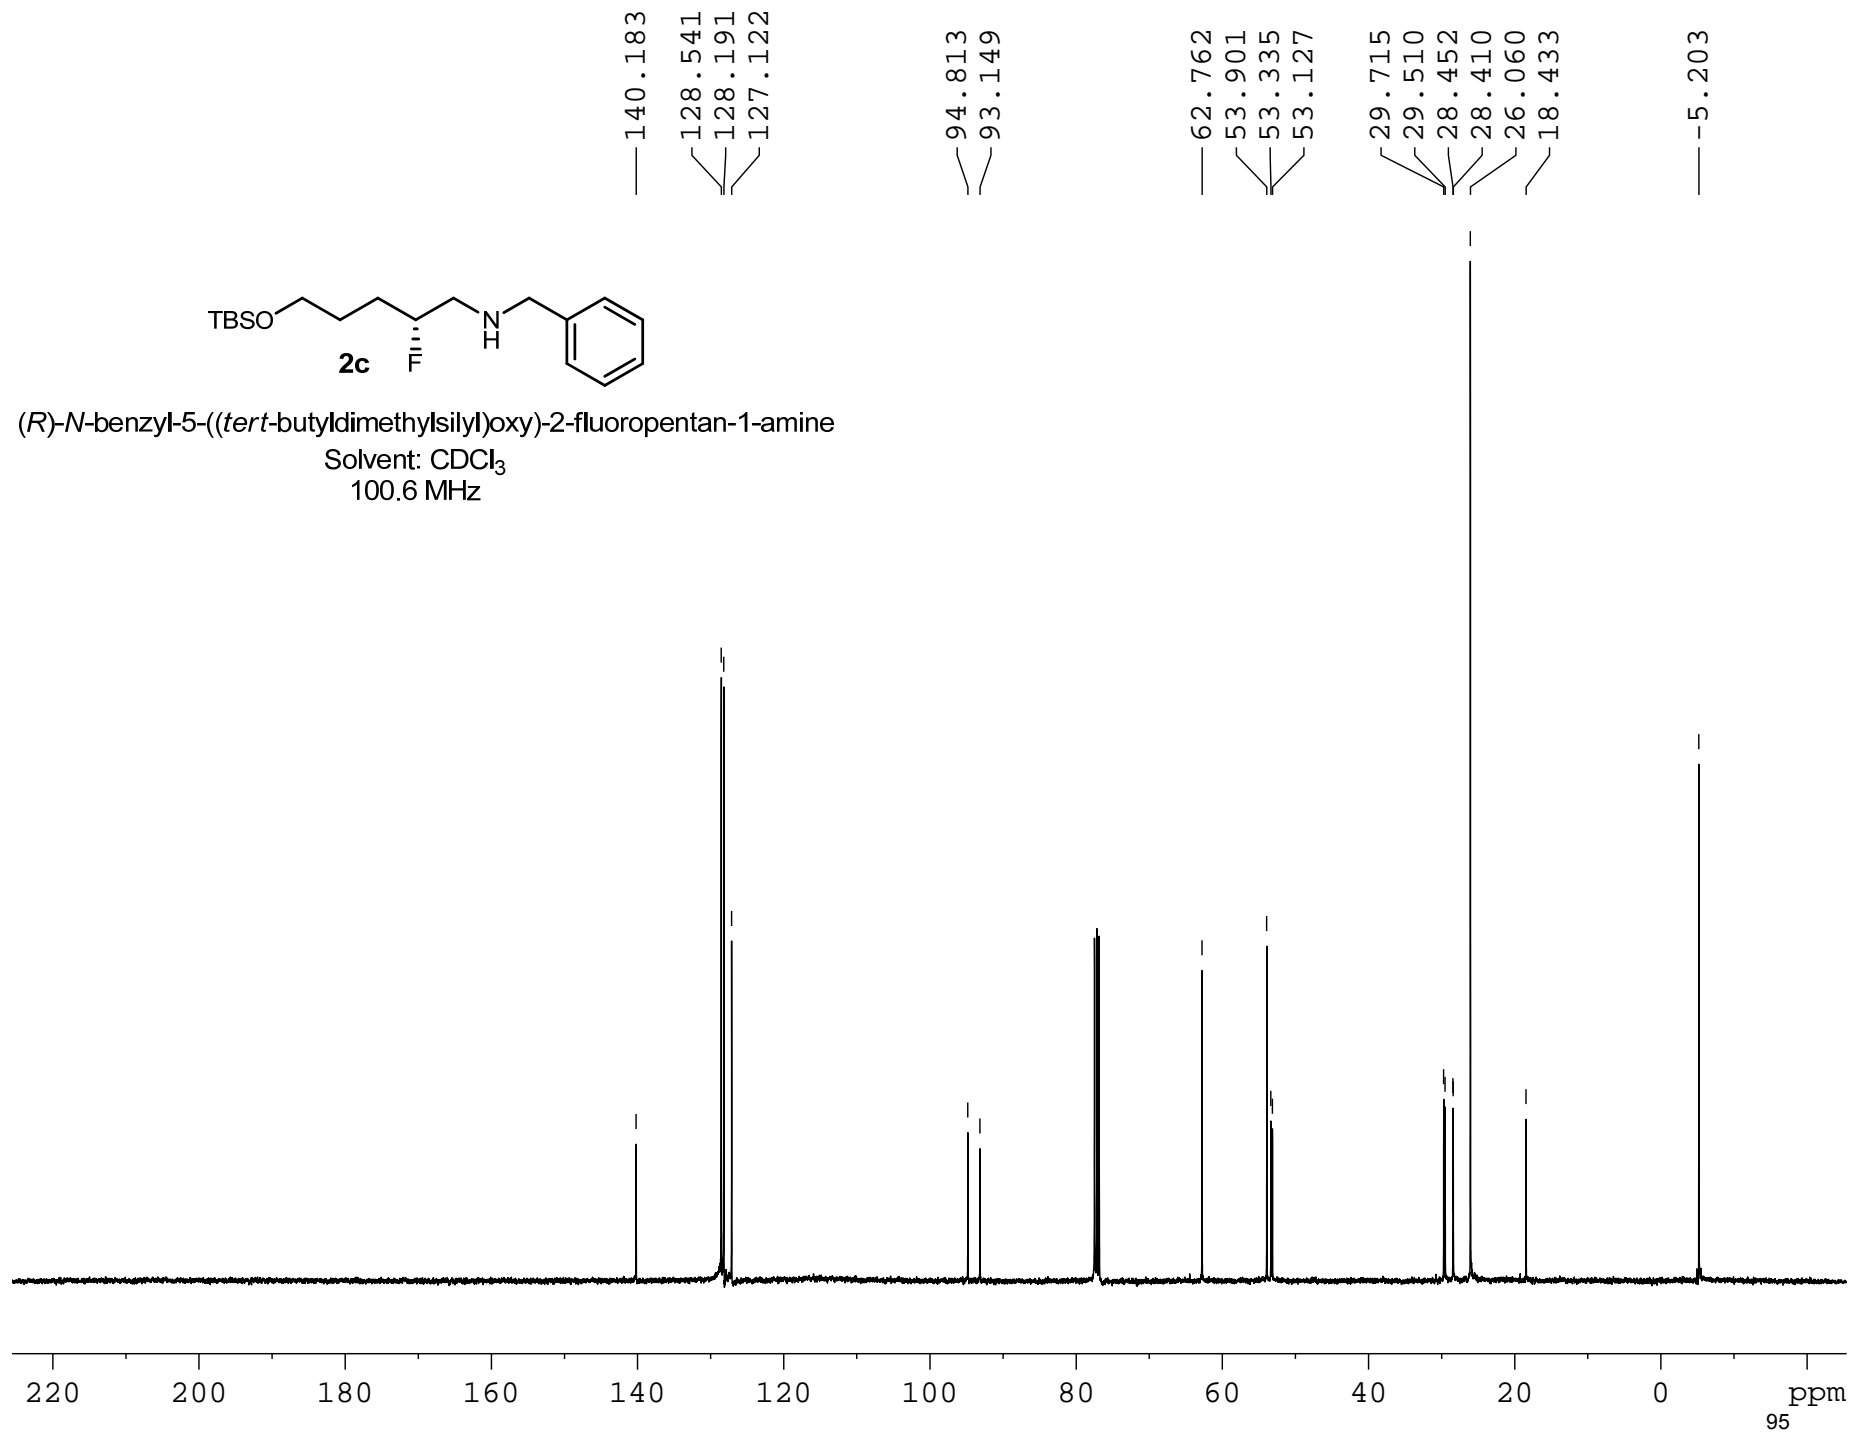

## Elemental Composition Report

Page 1

### Single Mass Analysis

Tolerance = 5.0 PPM / DBE: min = -0.5, max = 25.0

Element prediction: Off

Number of isotope peaks used for i-FIT = 2

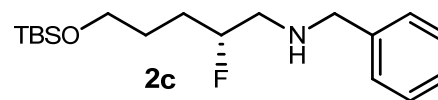

Monoisotopic Mass, Even Electron Ions

164 formula(e) evaluated with 1 results within limits (up to 50 best isotopic matches for each mass)

Elements Used:

C: 15-500 H: 10-1000 N: 1-200 O: 1-200 F: 1-1 Si: 1-1

MCO-V-24

S/N: UH193

MCO-V-24\_120712\_001 97 (1.807) AM (Cen,4, 80.00, Ar,8000.0,556.28,0.70); Sm (SG, 2x1.00); Cm (90:100)

07-Dec-2012  
12:34:55  
TOF MS ES+  
7.44e+003

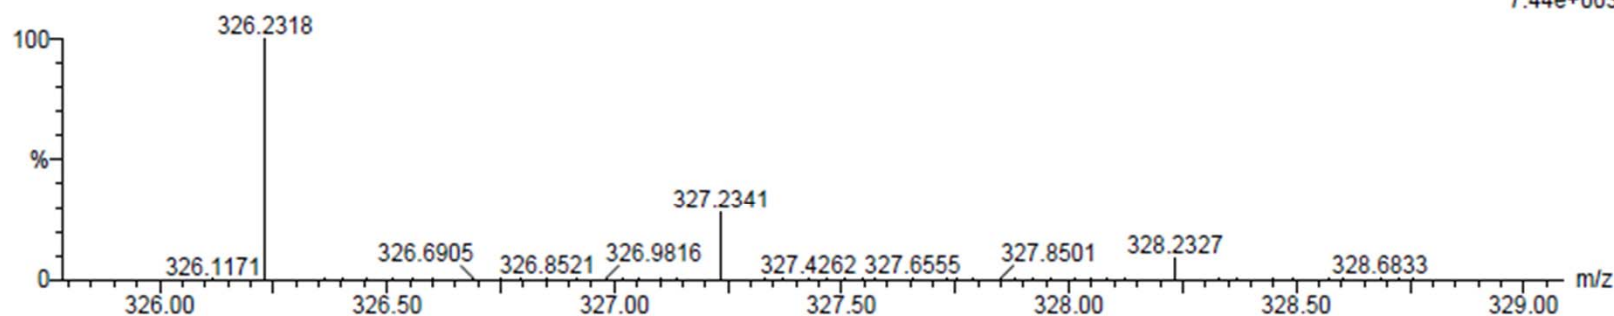

Minimum: -0.5  
Maximum: 5.0 5.0 25.0

| Mass     | Calc. Mass | mDa | PPM | DBE | i-FIT | Formula          |
|----------|------------|-----|-----|-----|-------|------------------|
| 326.2318 | 326.2315   | 0.3 | 0.9 | 3.5 | 3.4   | C18 H33 N O F Si |

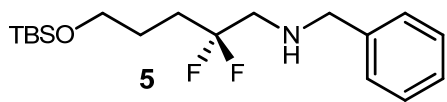

*N*-benzyl-5-((*tert*-butyldimethylsilyl)oxy)-2,2-difluoropentan-1-amine

Solvent: CDCl<sub>3</sub>

400.13 MHz

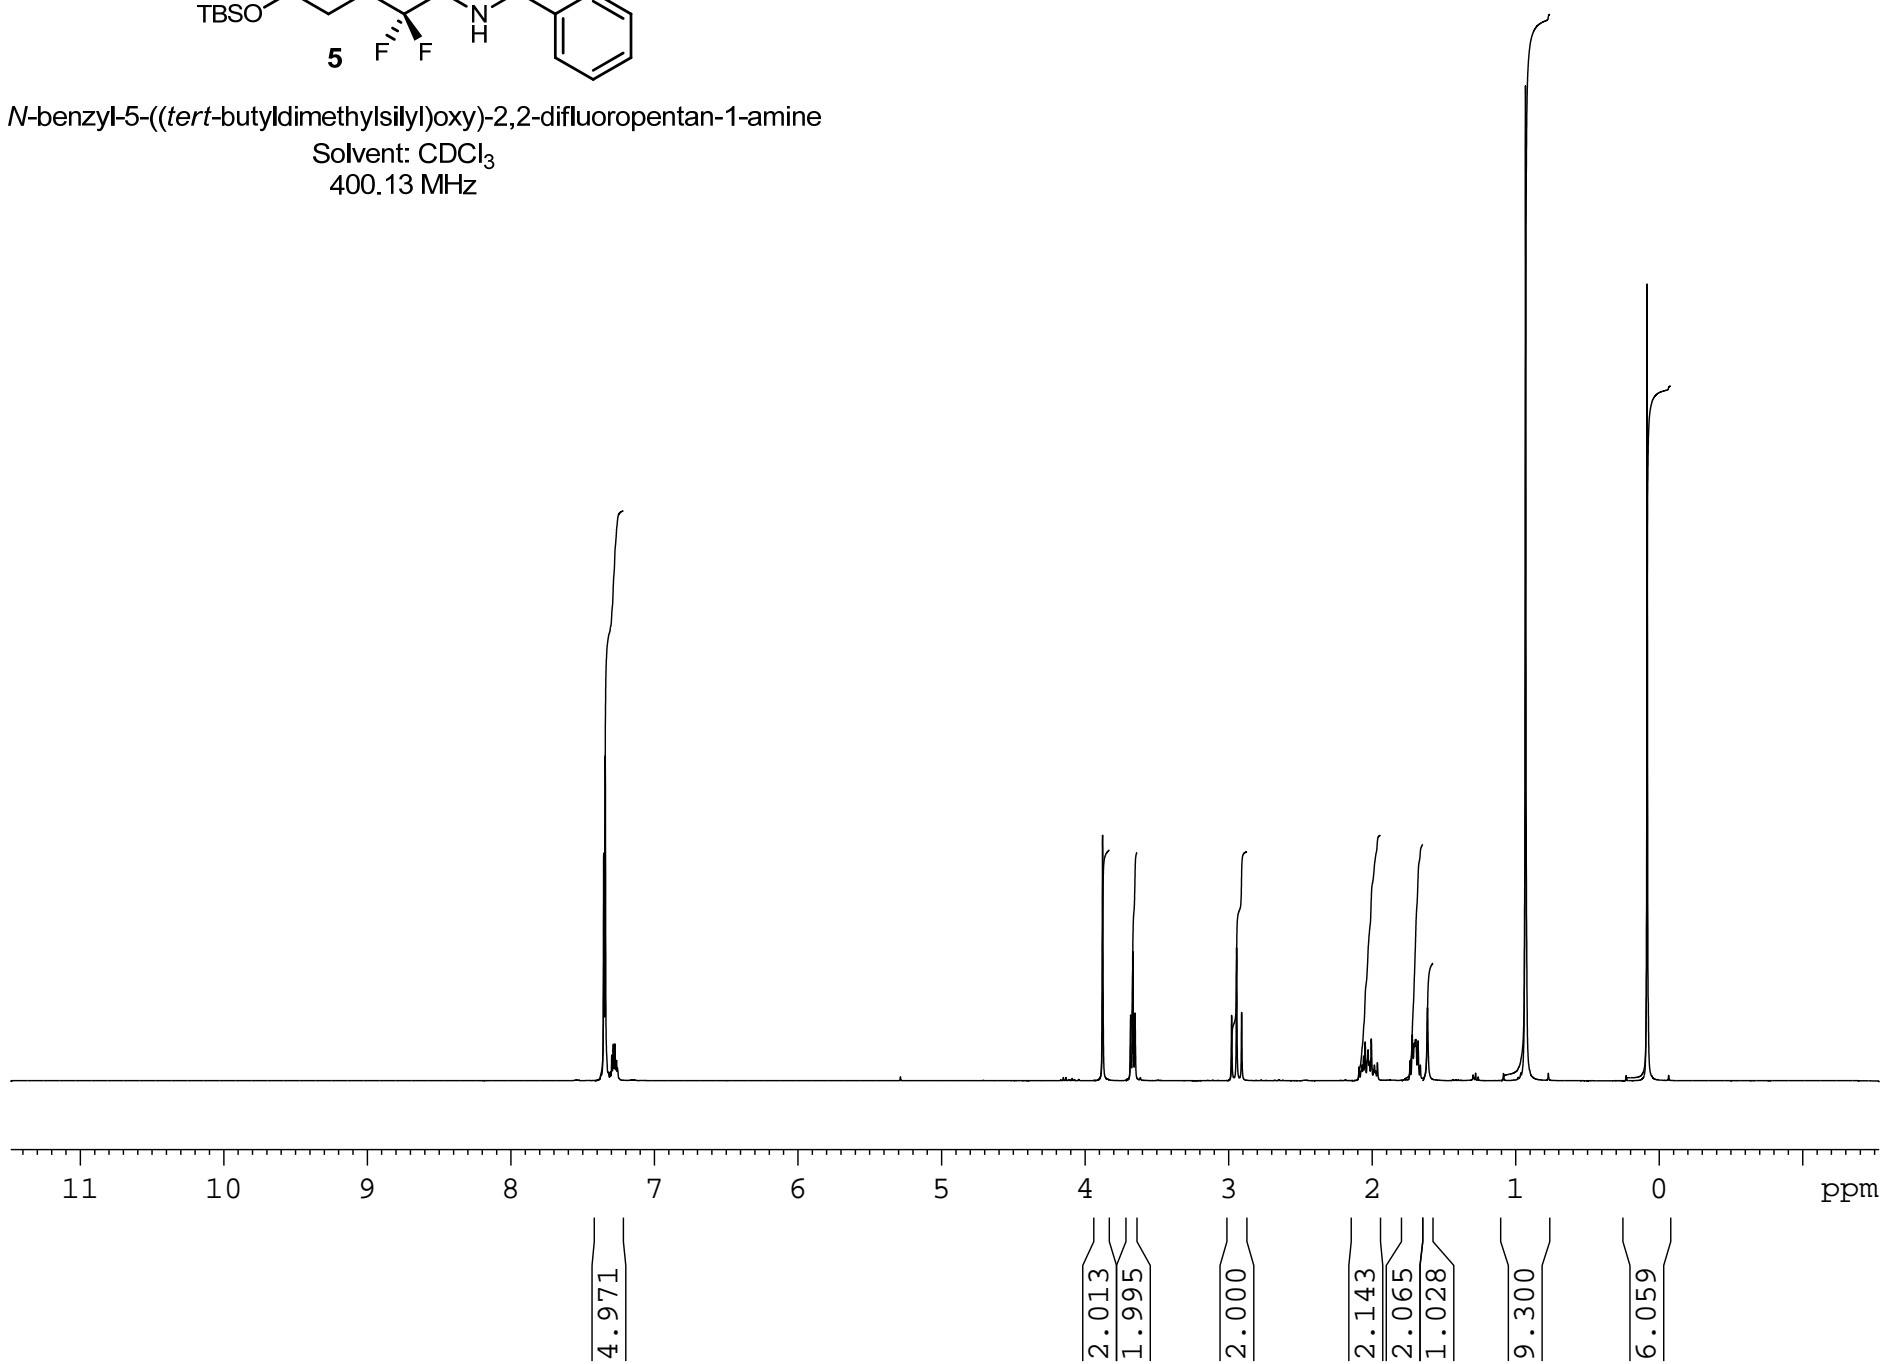

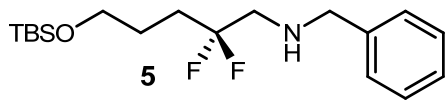

*N*-benzyl-5-((*tert*-butyldimethylsilyl)oxy)-2,2-difluoropentan-1-amine  
 Solvent: CDCl<sub>3</sub>  
 100.6 MHz

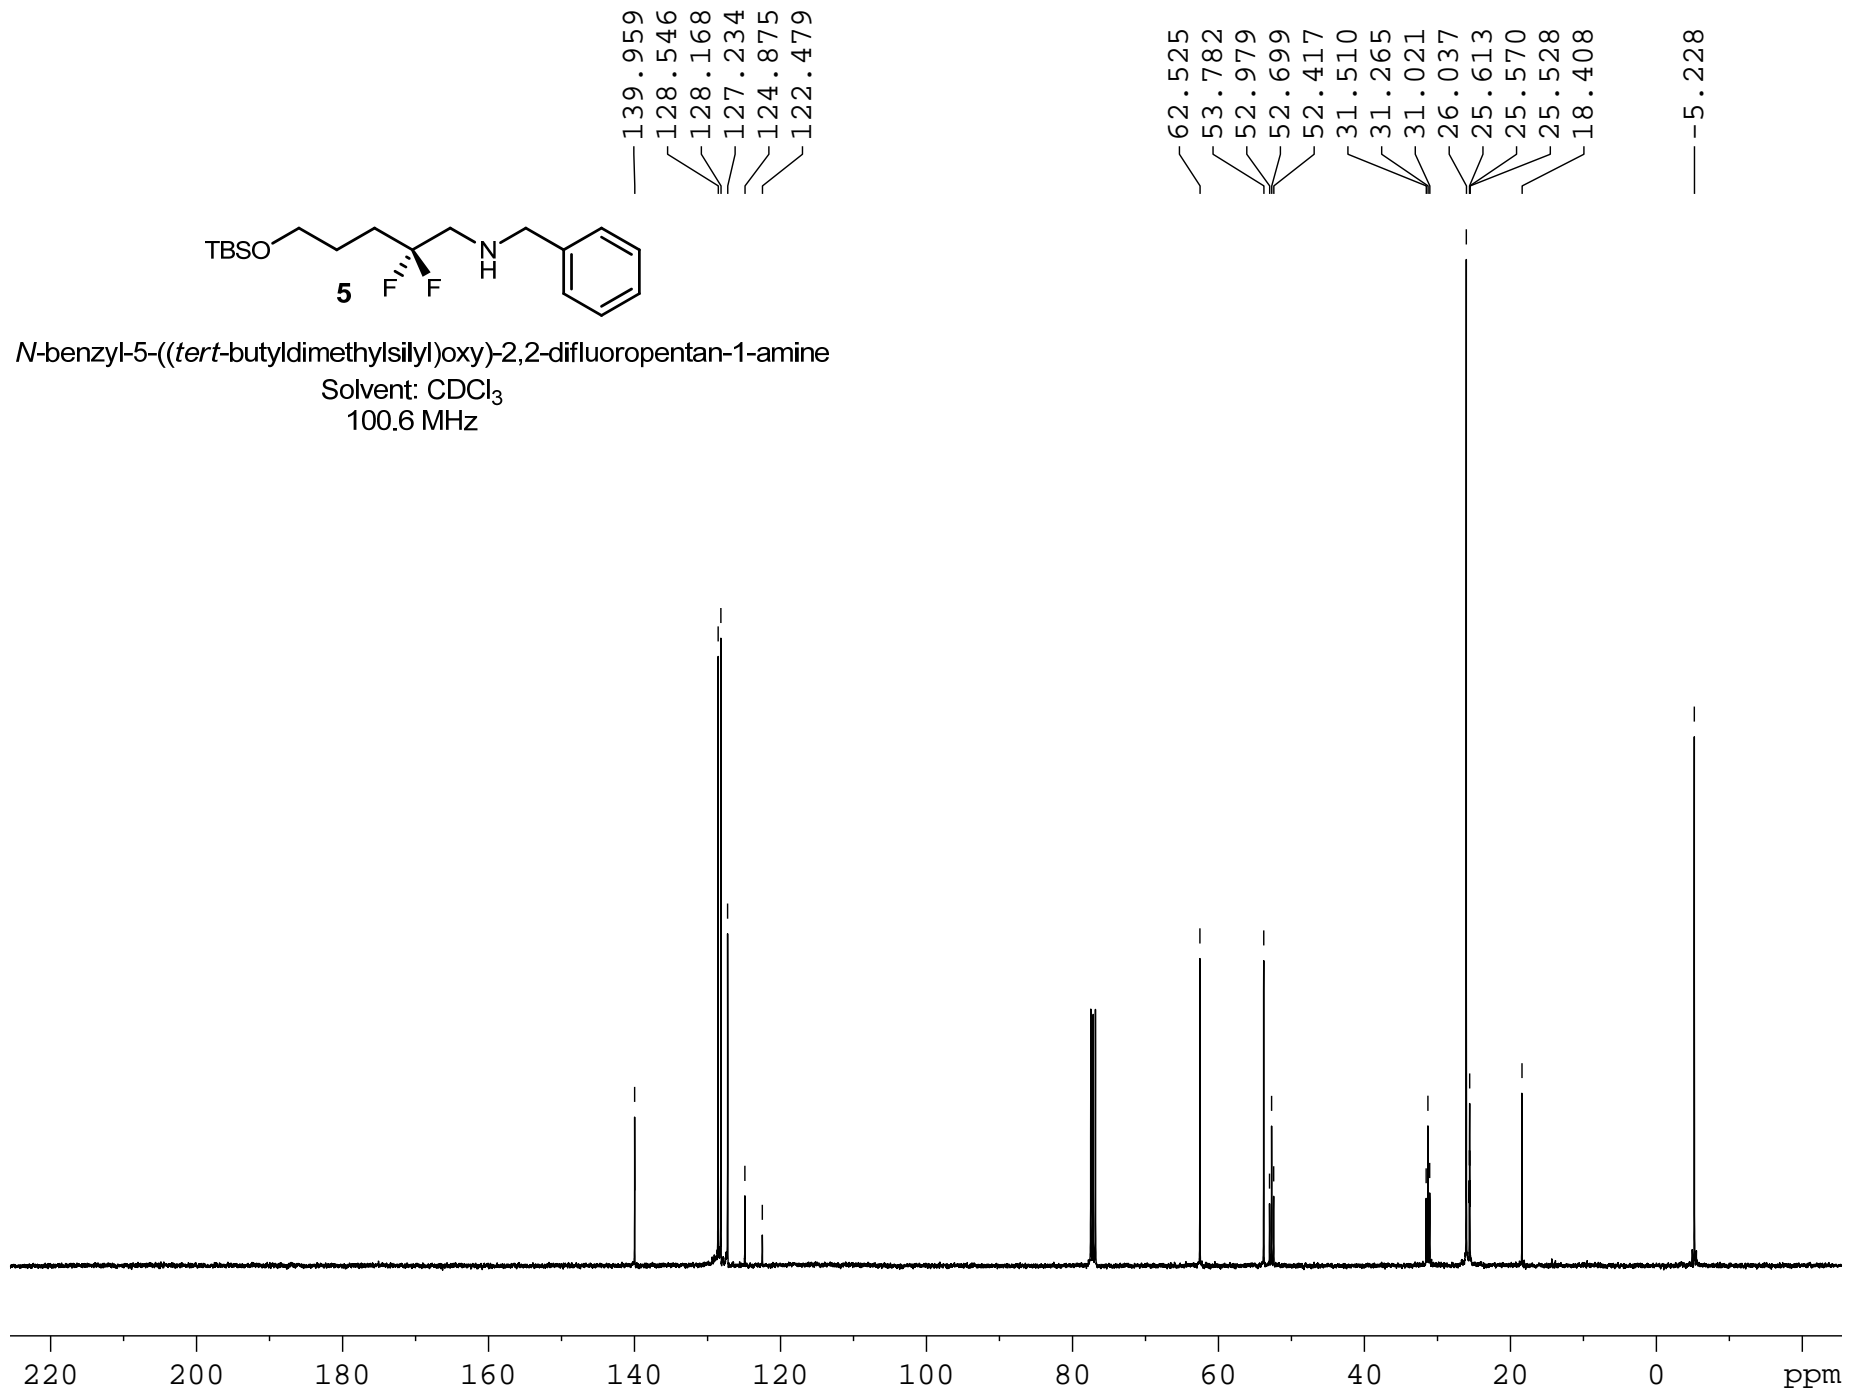

# Elemental Composition Report

## Single Mass Analysis

Tolerance = 5.0 PPM / DBE: min = -0.5, max = 25.0  
Element prediction: Off  
Number of isotope peaks used for i-FIT = 2

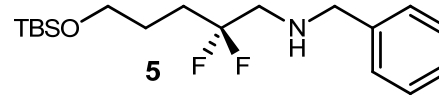

Monoisotopic Mass, Even Electron Ions  
164 formula(e) evaluated with 1 results within limits (up to 50 best isotopic matches for each mass)  
Elements Used:  
C: 15-500 H: 10-1000 N: 1-200 O: 1-200 F: 2-2 Si: 1-1

MCO-V-45

S/N: UH193

MCO-V-45\_120712\_001 49 (0.916) AM (Cen,4, 80.00, Ar,8000.0,556.28,0.70); Sm (SG, 2x1.00); Cm (40:50)

07-Dec-2012  
13:00:23  
TOF MS ES+  
1.25e+004

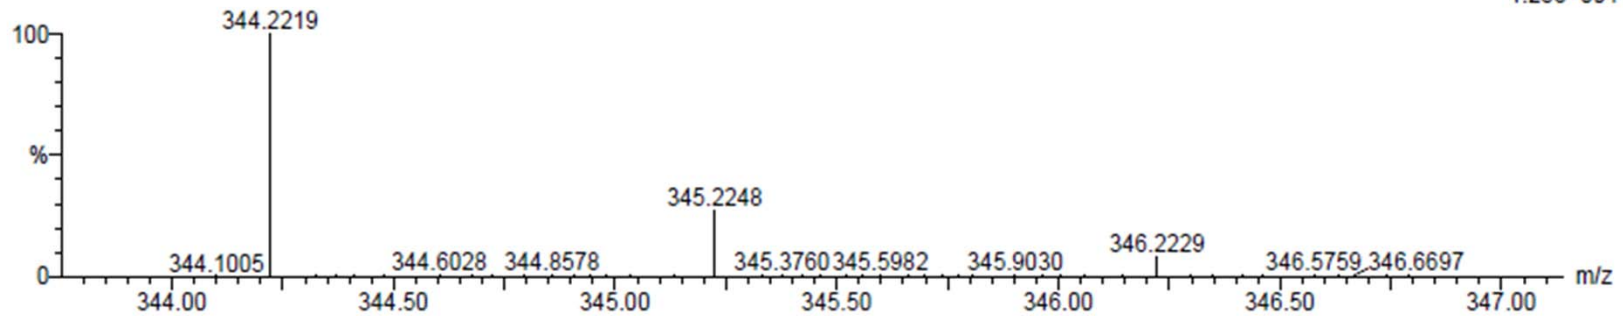

Minimum: -0.5  
Maximum: 5.0 5.0 25.0

| Mass     | Calc. Mass | mDa  | PPM  | DBE | i-FIT | Formula           |
|----------|------------|------|------|-----|-------|-------------------|
| 344.2219 | 344.2221   | -0.2 | -0.6 | 3.5 | 2.6   | C18 H32 N O F2 Si |

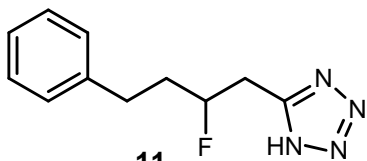

5-(2-fluoro-4-phenylbutyl)-1H-tetrazole

Solvent: MeOD

400.13 MHz

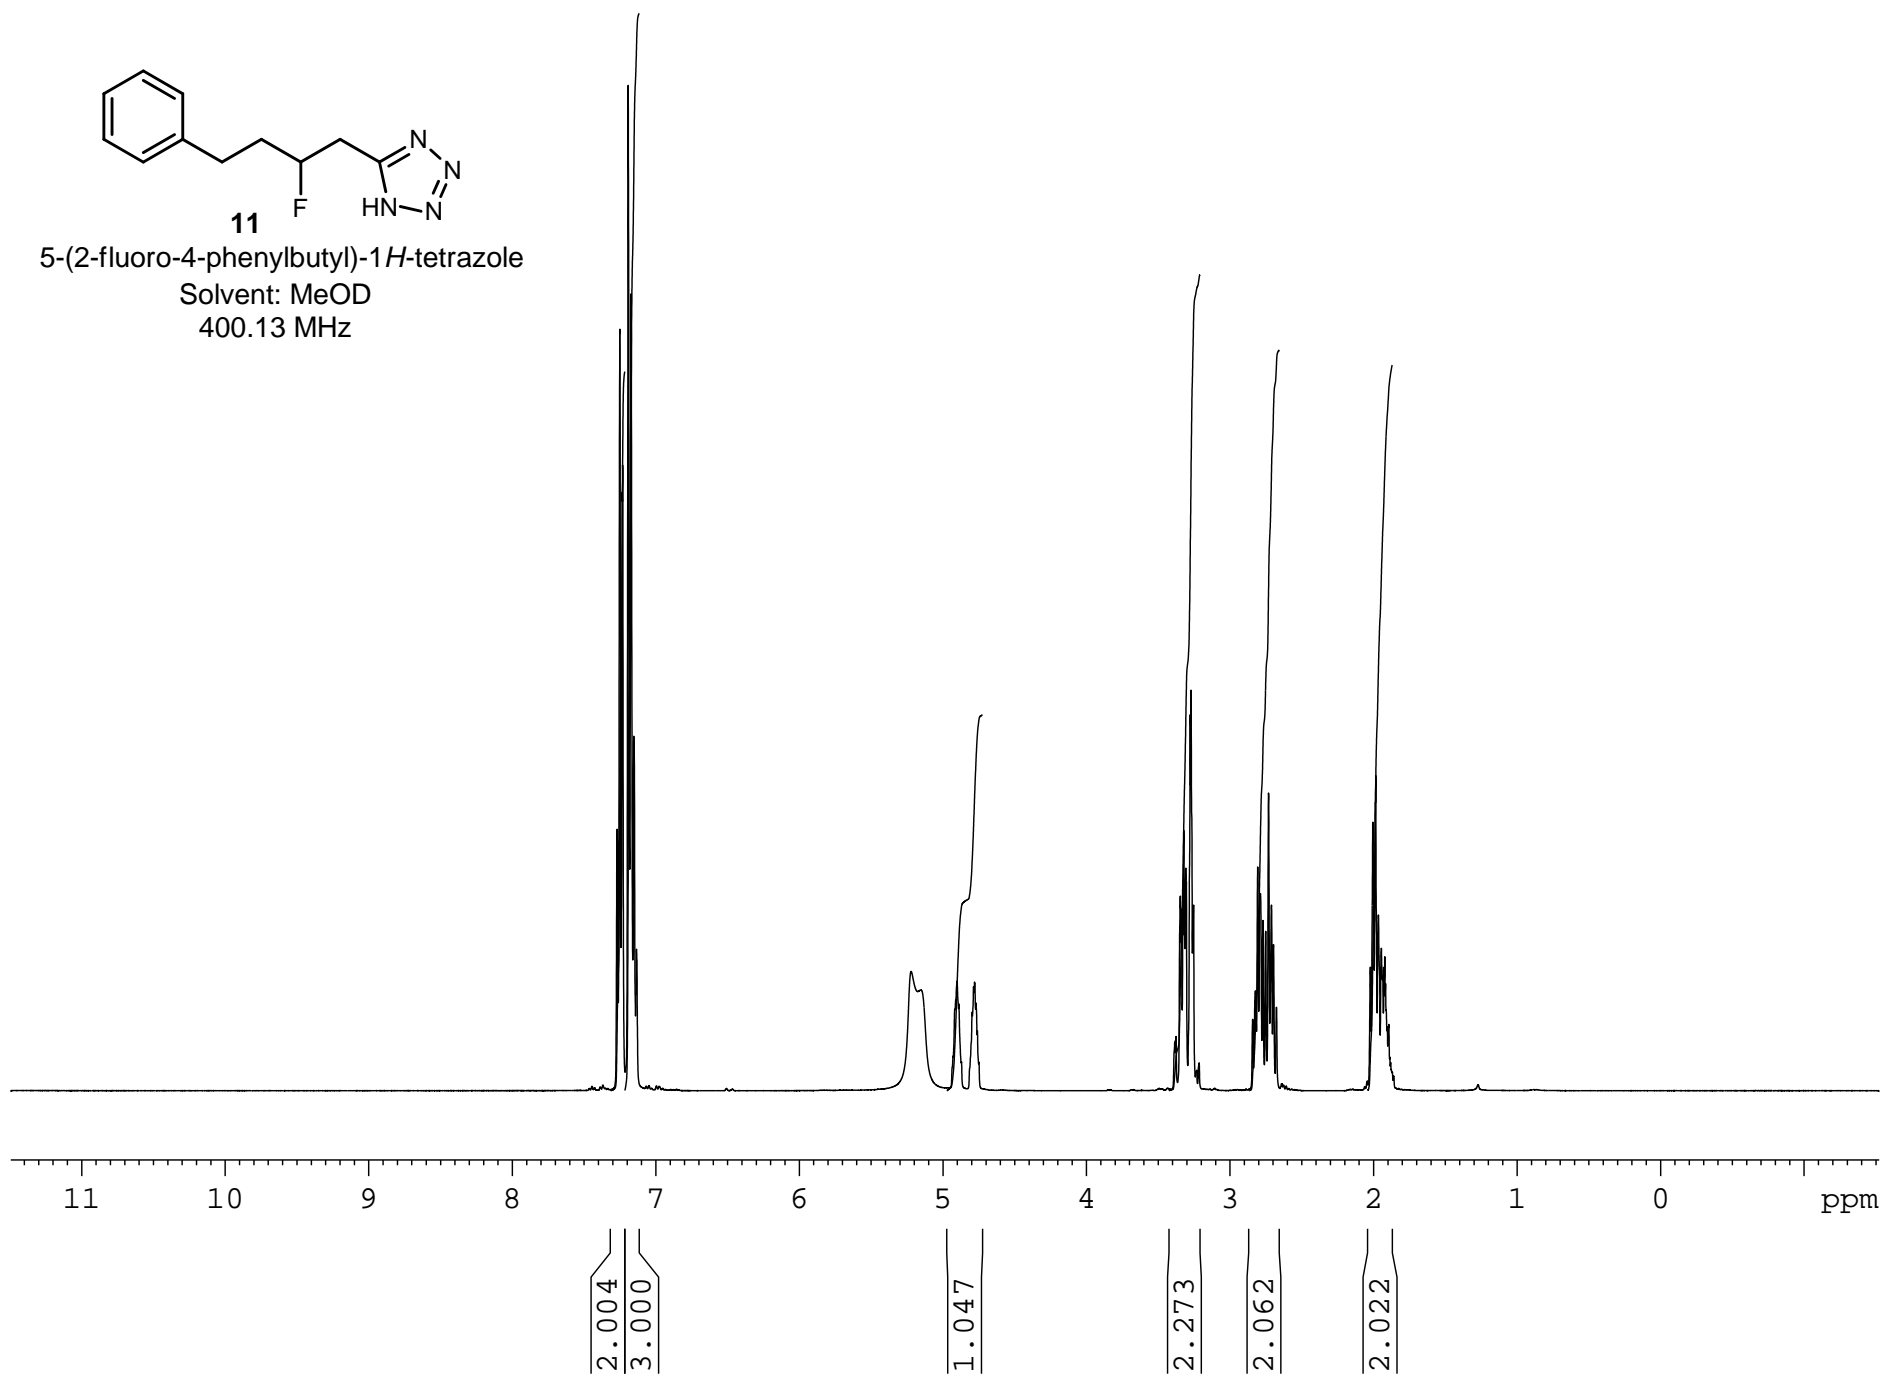



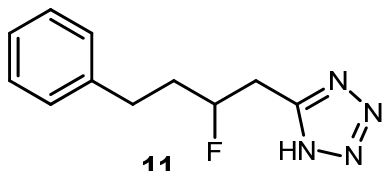

**11**

5-(2-fluoro-4-phenylbutyl)-1H-tetrazole

Solvent: MeOD

100.6 MHz

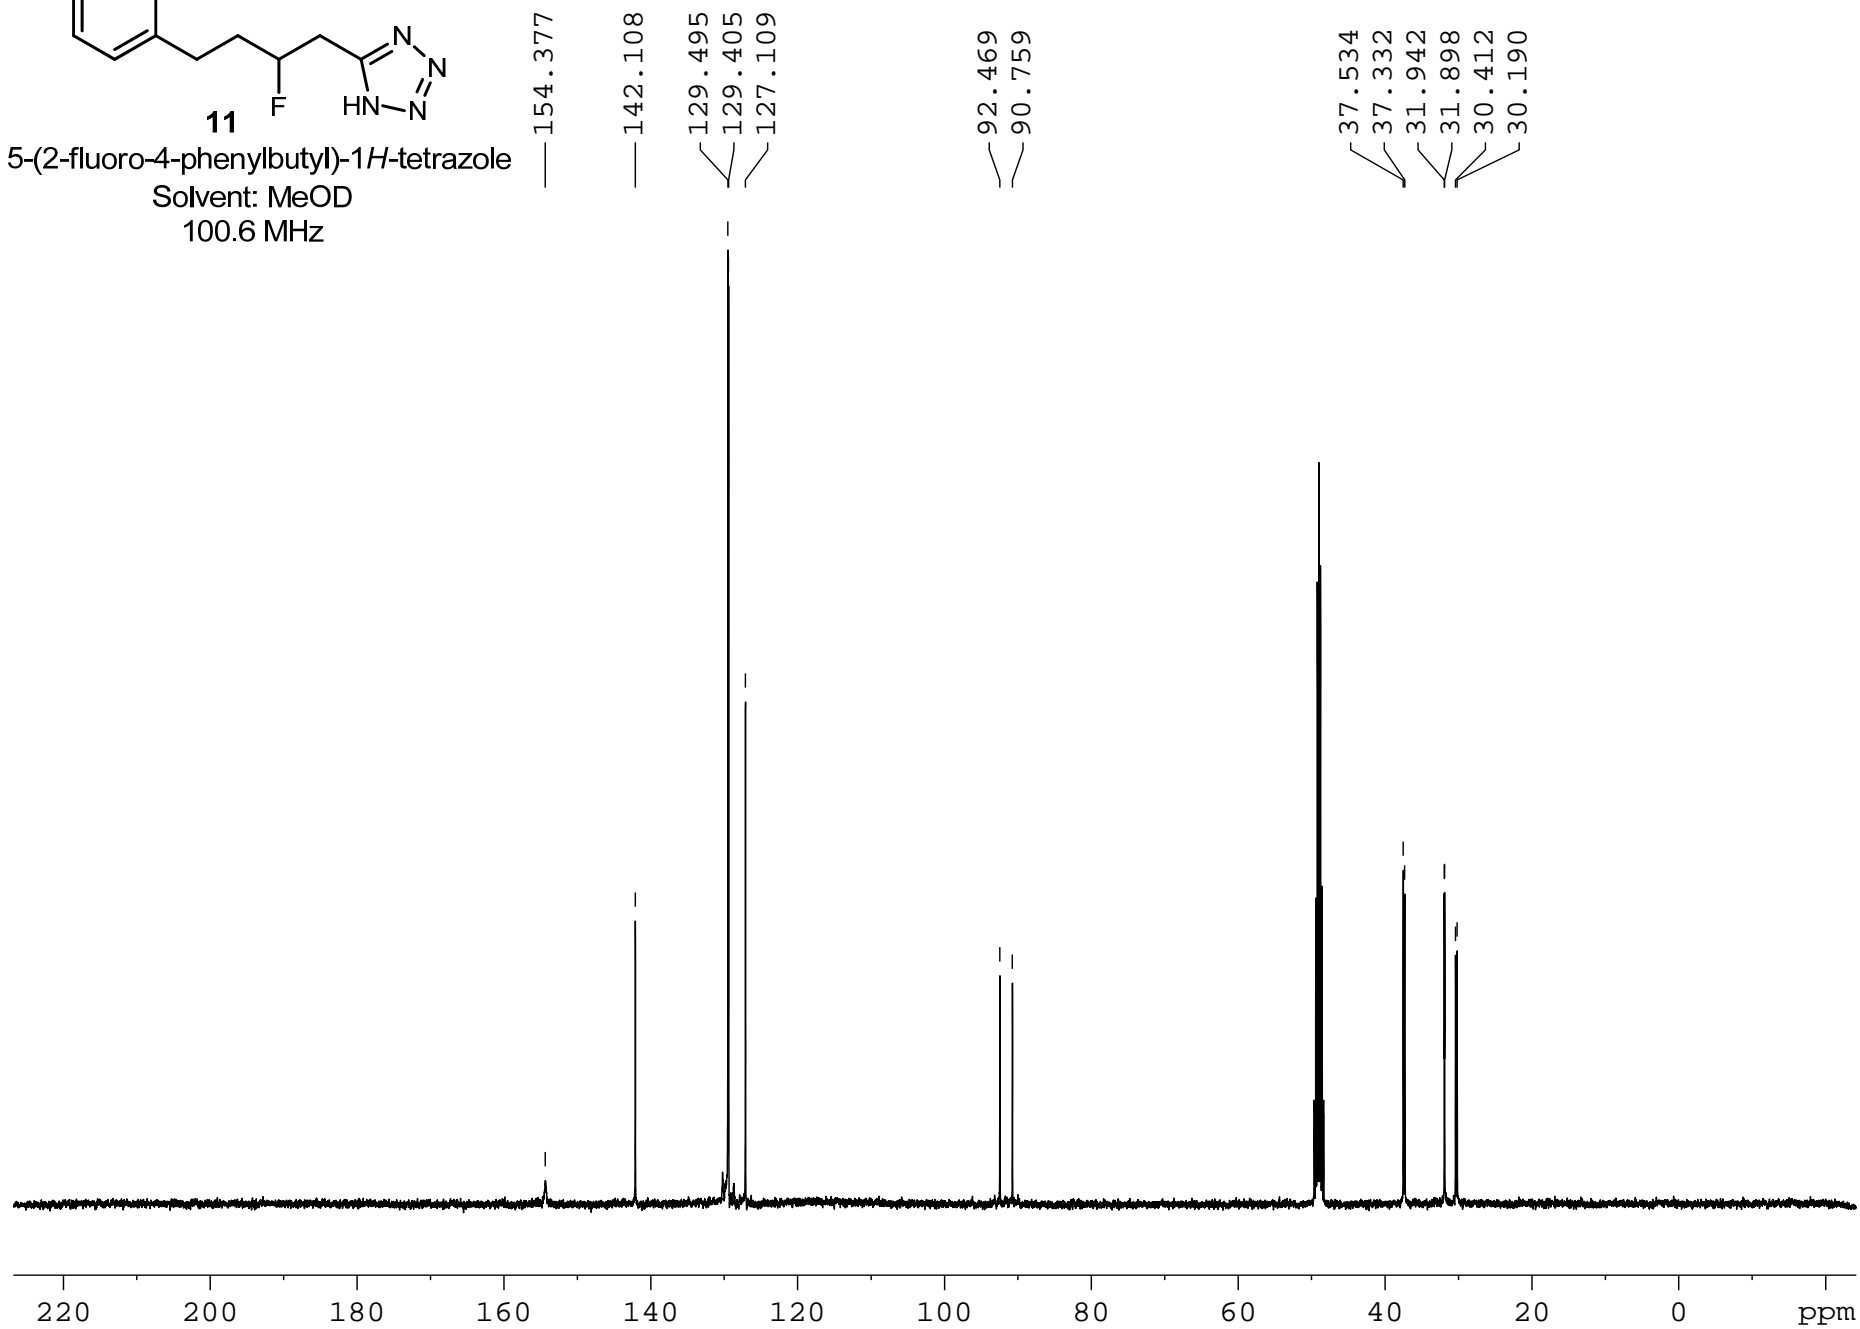

## Elemental Composition Report

Page 1

### Single Mass Analysis

Tolerance = 5.0 PPM / DBE: min = -0.5, max = 25.0

Element prediction: Off

Number of isotope peaks used for i-FIT = 2

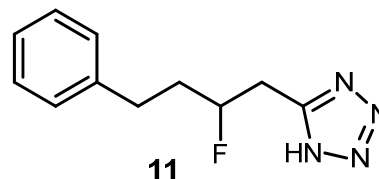

11  
5-(2-fluoro-4-phenylbutyl)-1H-tetrazole

Monoisotopic Mass, Even Electron Ions

17 formula(e) evaluated with 1 results within limits (up to 50 best isotopic matches for each mass)

Elements Used:

C: 10-500 H: 10-1000 N: 1-200 F: 1-1

MCO-V-184

S/N: UH193

MCO-V-184\_041013\_001 95 (1.770) AM (Cen,5, 80.00, Ar,8000.0,556.28,0.70); Sm (SG, 2x1.00); Cm (90:100)

10-Apr-2013  
10:56:47  
1: TOF MS ES+  
1.09e+004

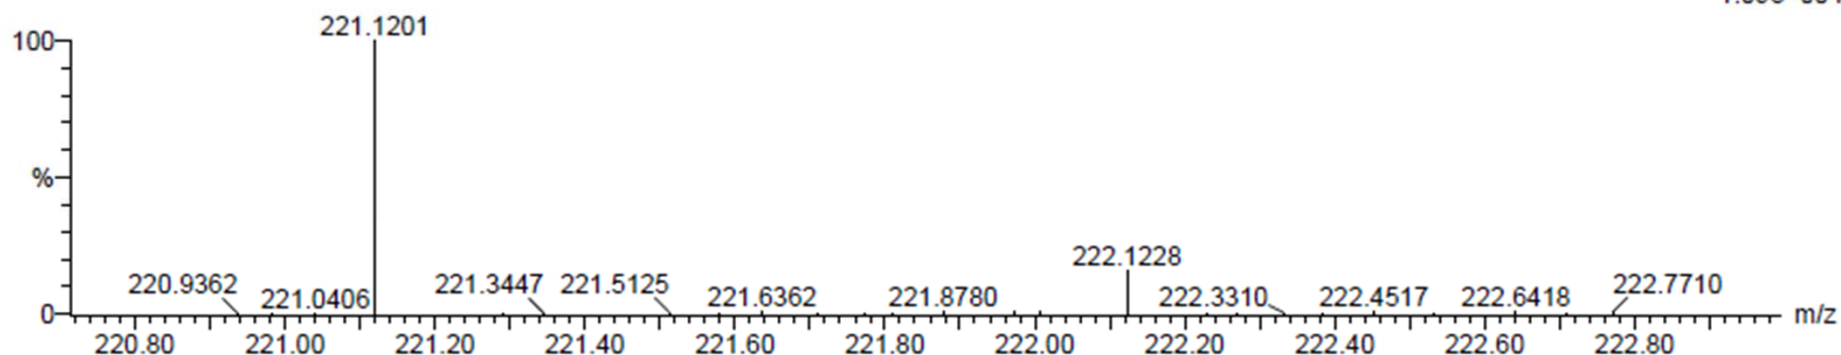

Minimum: -0.5  
Maximum: 5.0 5.0 25.0

| Mass     | Calc. Mass | mDa  | PPM  | DBE | i-FIT | Formula      |
|----------|------------|------|------|-----|-------|--------------|
| 221.1201 | 221.1202   | -0.1 | -0.5 | 6.5 | 5.7   | C11 H14 N4 F |

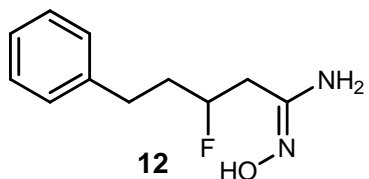

(*E*)-3-fluoro-*N*-hydroxy-5-phenylpentanimidamide

Solvent: MeOD

400.13 MHz

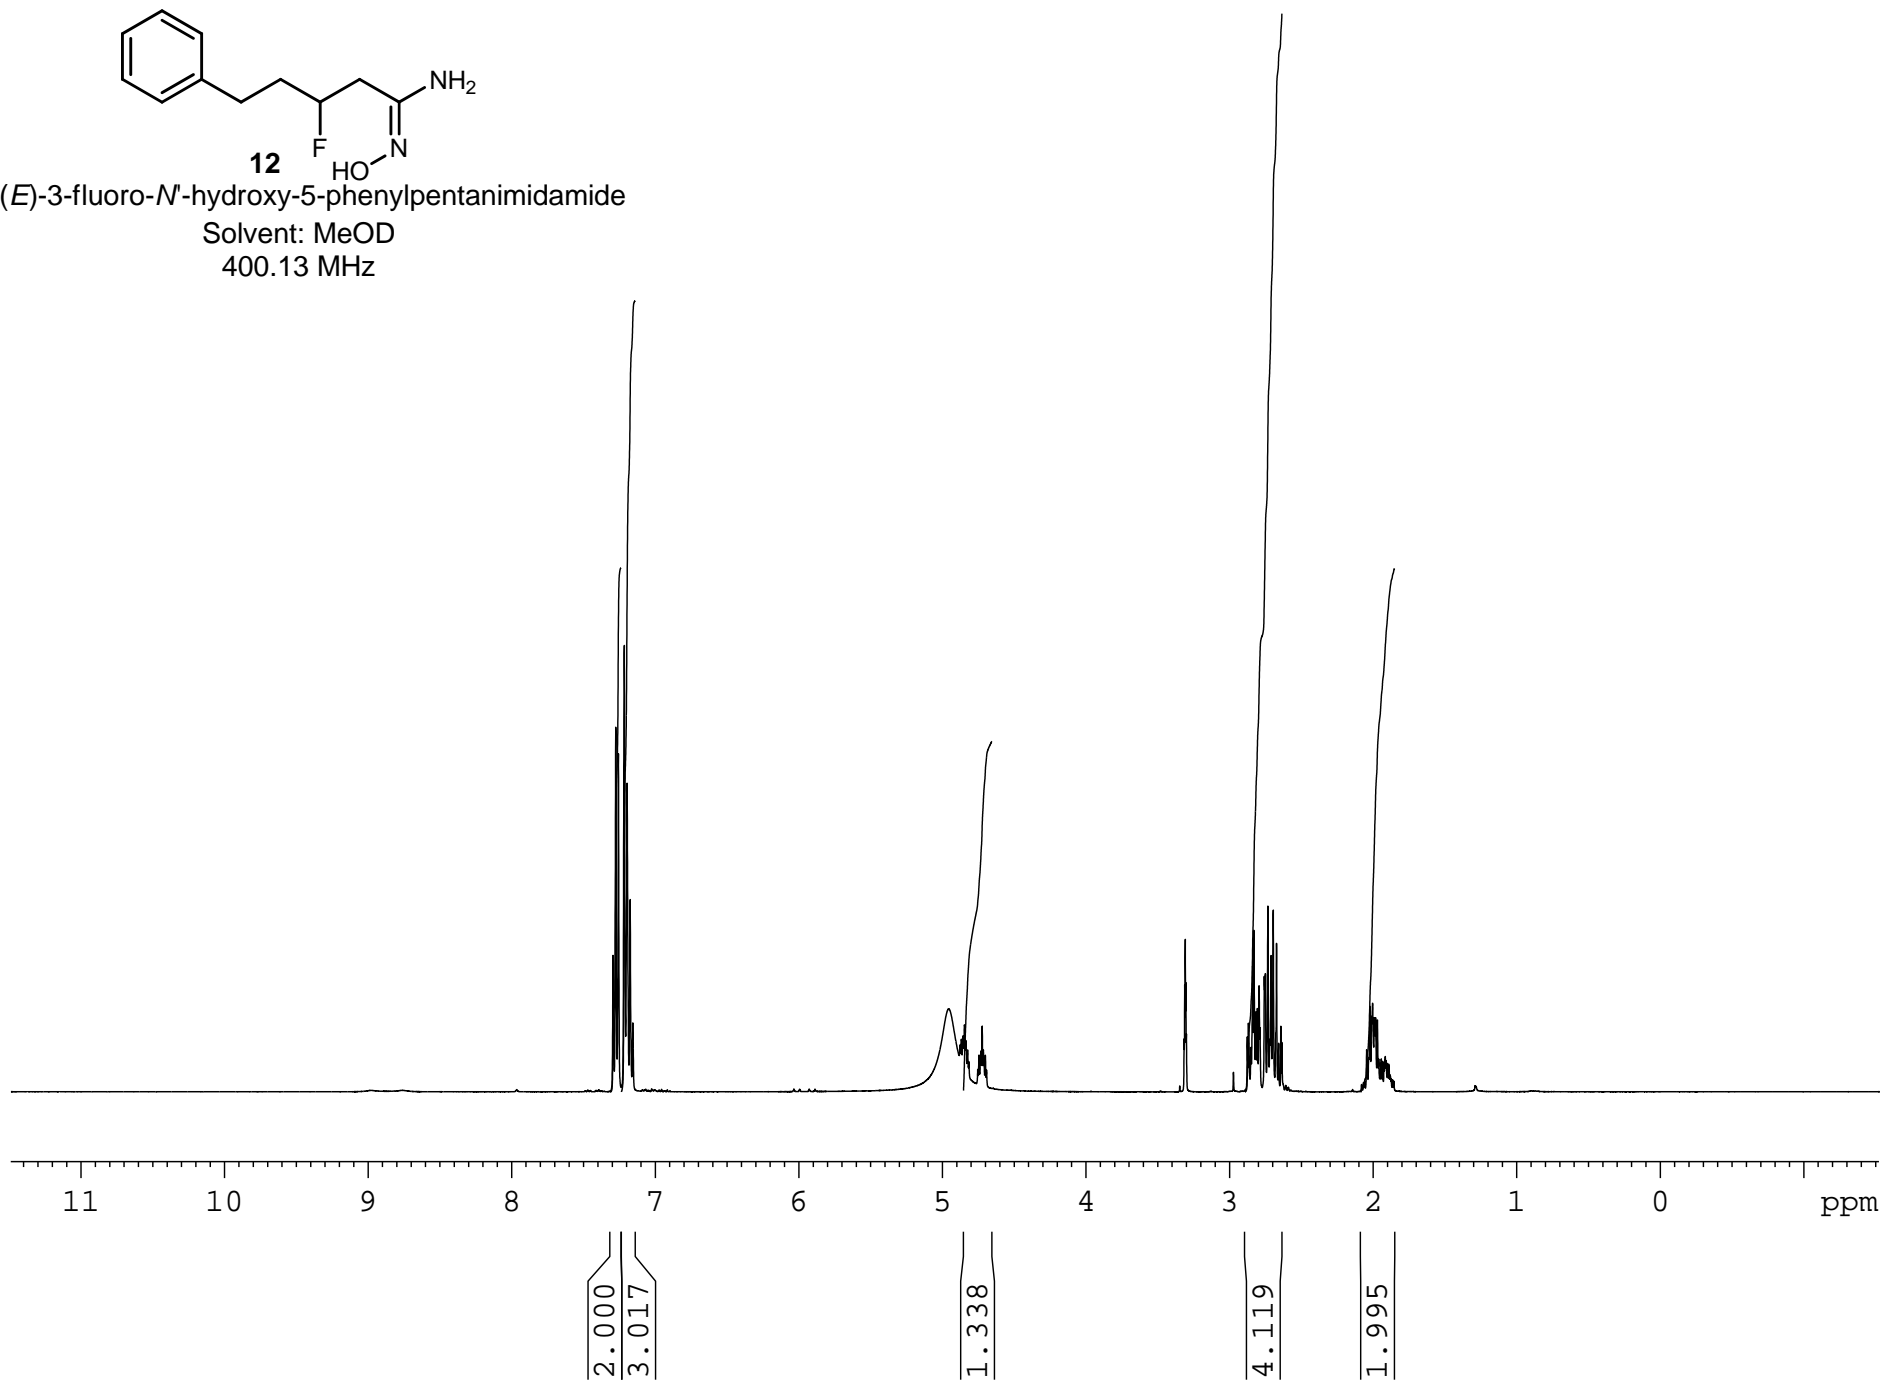

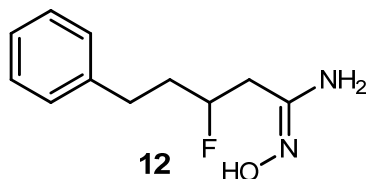

**12**

(*E*)-3-fluoro-*N*-hydroxy-5-phenylpentanimidamide

Solvent: MeOD

100.6 MHz

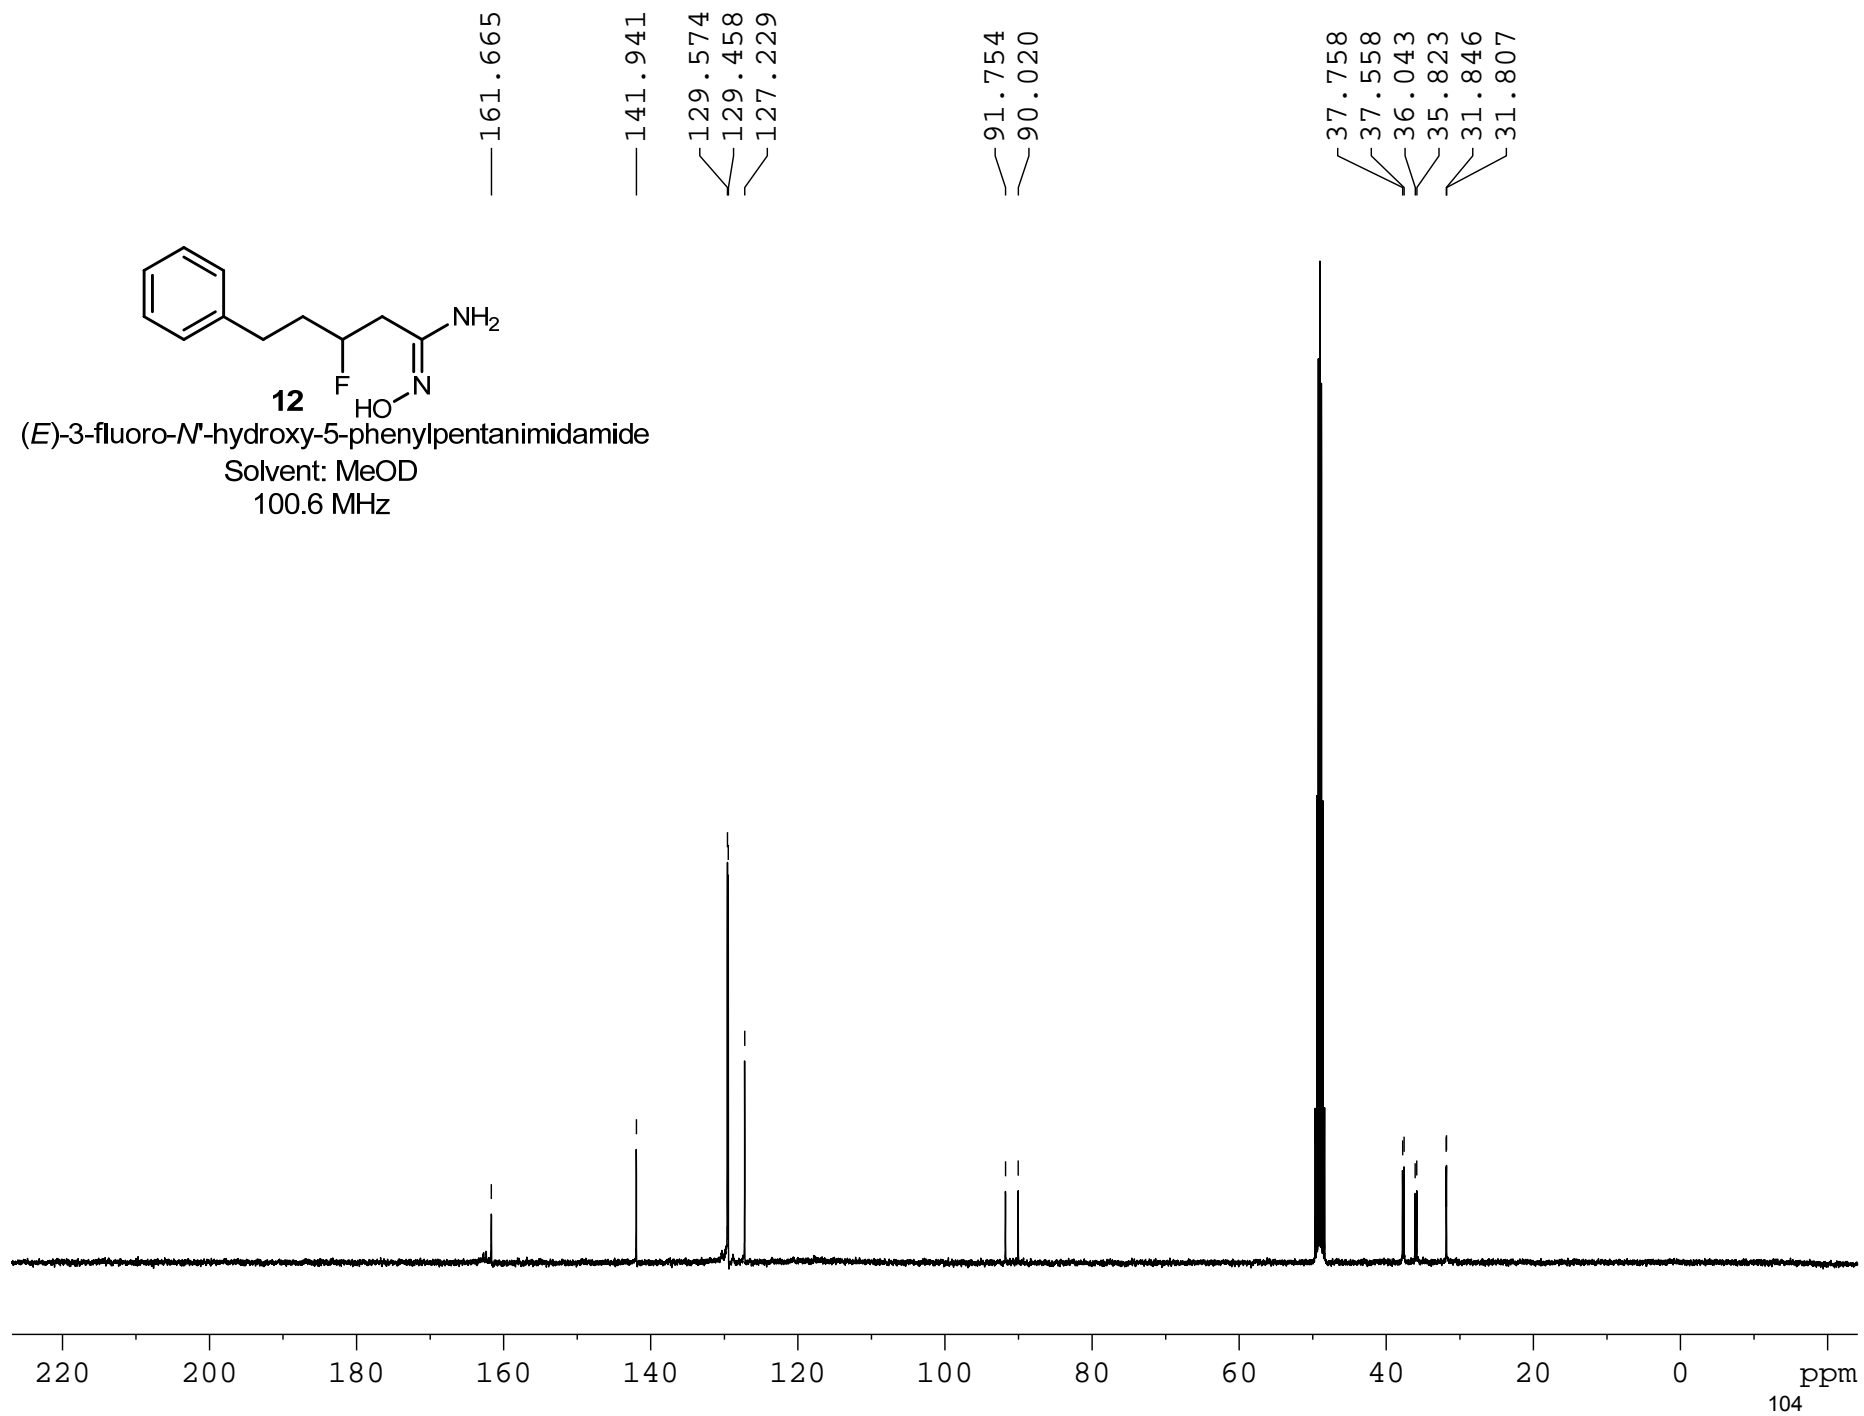

## Elemental Composition Report

### Single Mass Analysis

Tolerance = 5.0 PPM / DBE: min = -0.5, max = 25.0

Element prediction: Off

Number of isotope peaks used for i-FIT = 2

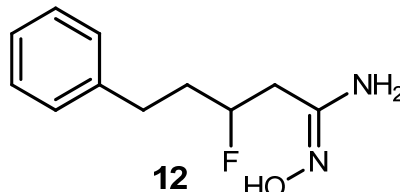

**12**  
(E)-3-fluoro-N'-hydroxy-5-phenylpentanimidamide

Monoisotopic Mass, Even Electron Ions

70 formula(e) evaluated with 1 results within limits (up to 50 best isotopic matches for each mass)

Elements Used:

C: 10-500 H: 10-1000 N: 1-200 O: 1-200 F: 1-1

### MCO-V-183

S/N: UH193

MCO-V-183\_041013\_001 80 (1.491) AM (Cen,5, 80.00, Ar,8000.0,556.28,0.70); Sm (SG, 2x1.00); Cm (80:90)

10-Apr-2013

10:29:04

1: TOF MS ES+

9.14e+003

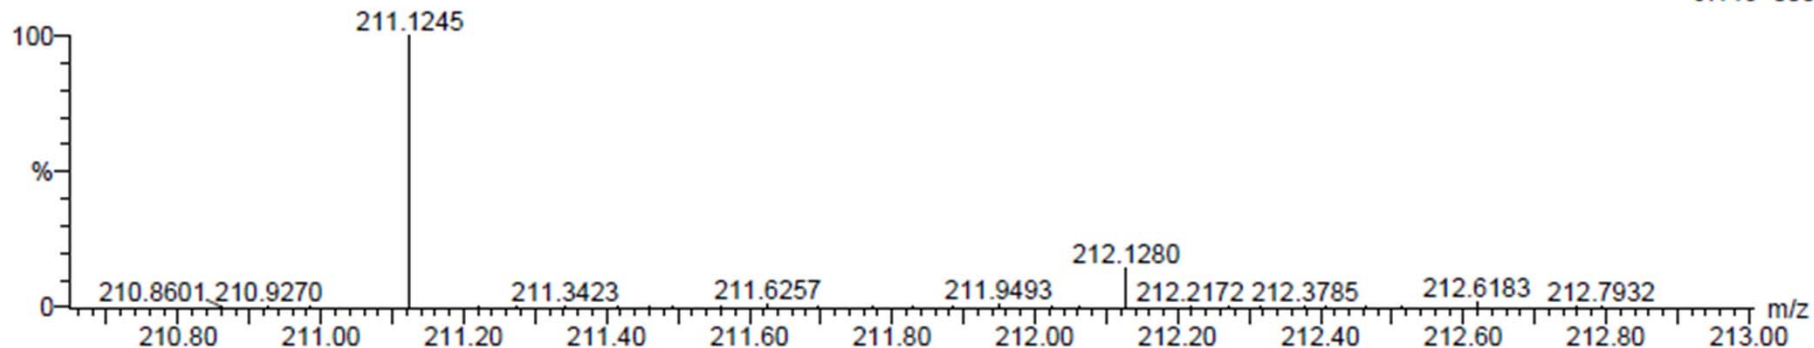

Minimum: -0.5  
Maximum: 5.0 5.0 25.0

| Mass     | Calc. Mass | mDa  | PPM  | DBE | i-FIT | Formula        |
|----------|------------|------|------|-----|-------|----------------|
| 211.1245 | 211.1247   | -0.2 | -0.9 | 4.5 | 2.4   | C11 H16 N2 O F |

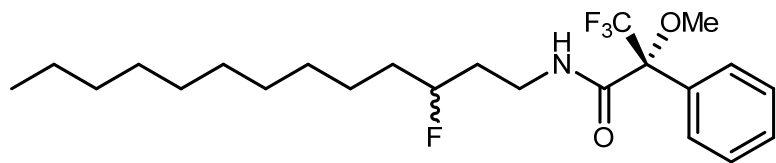

(2R)-3,3,3-trifluoro-N-(3-fluorotridecyl)-2-methoxy-2-phenylpropanamide

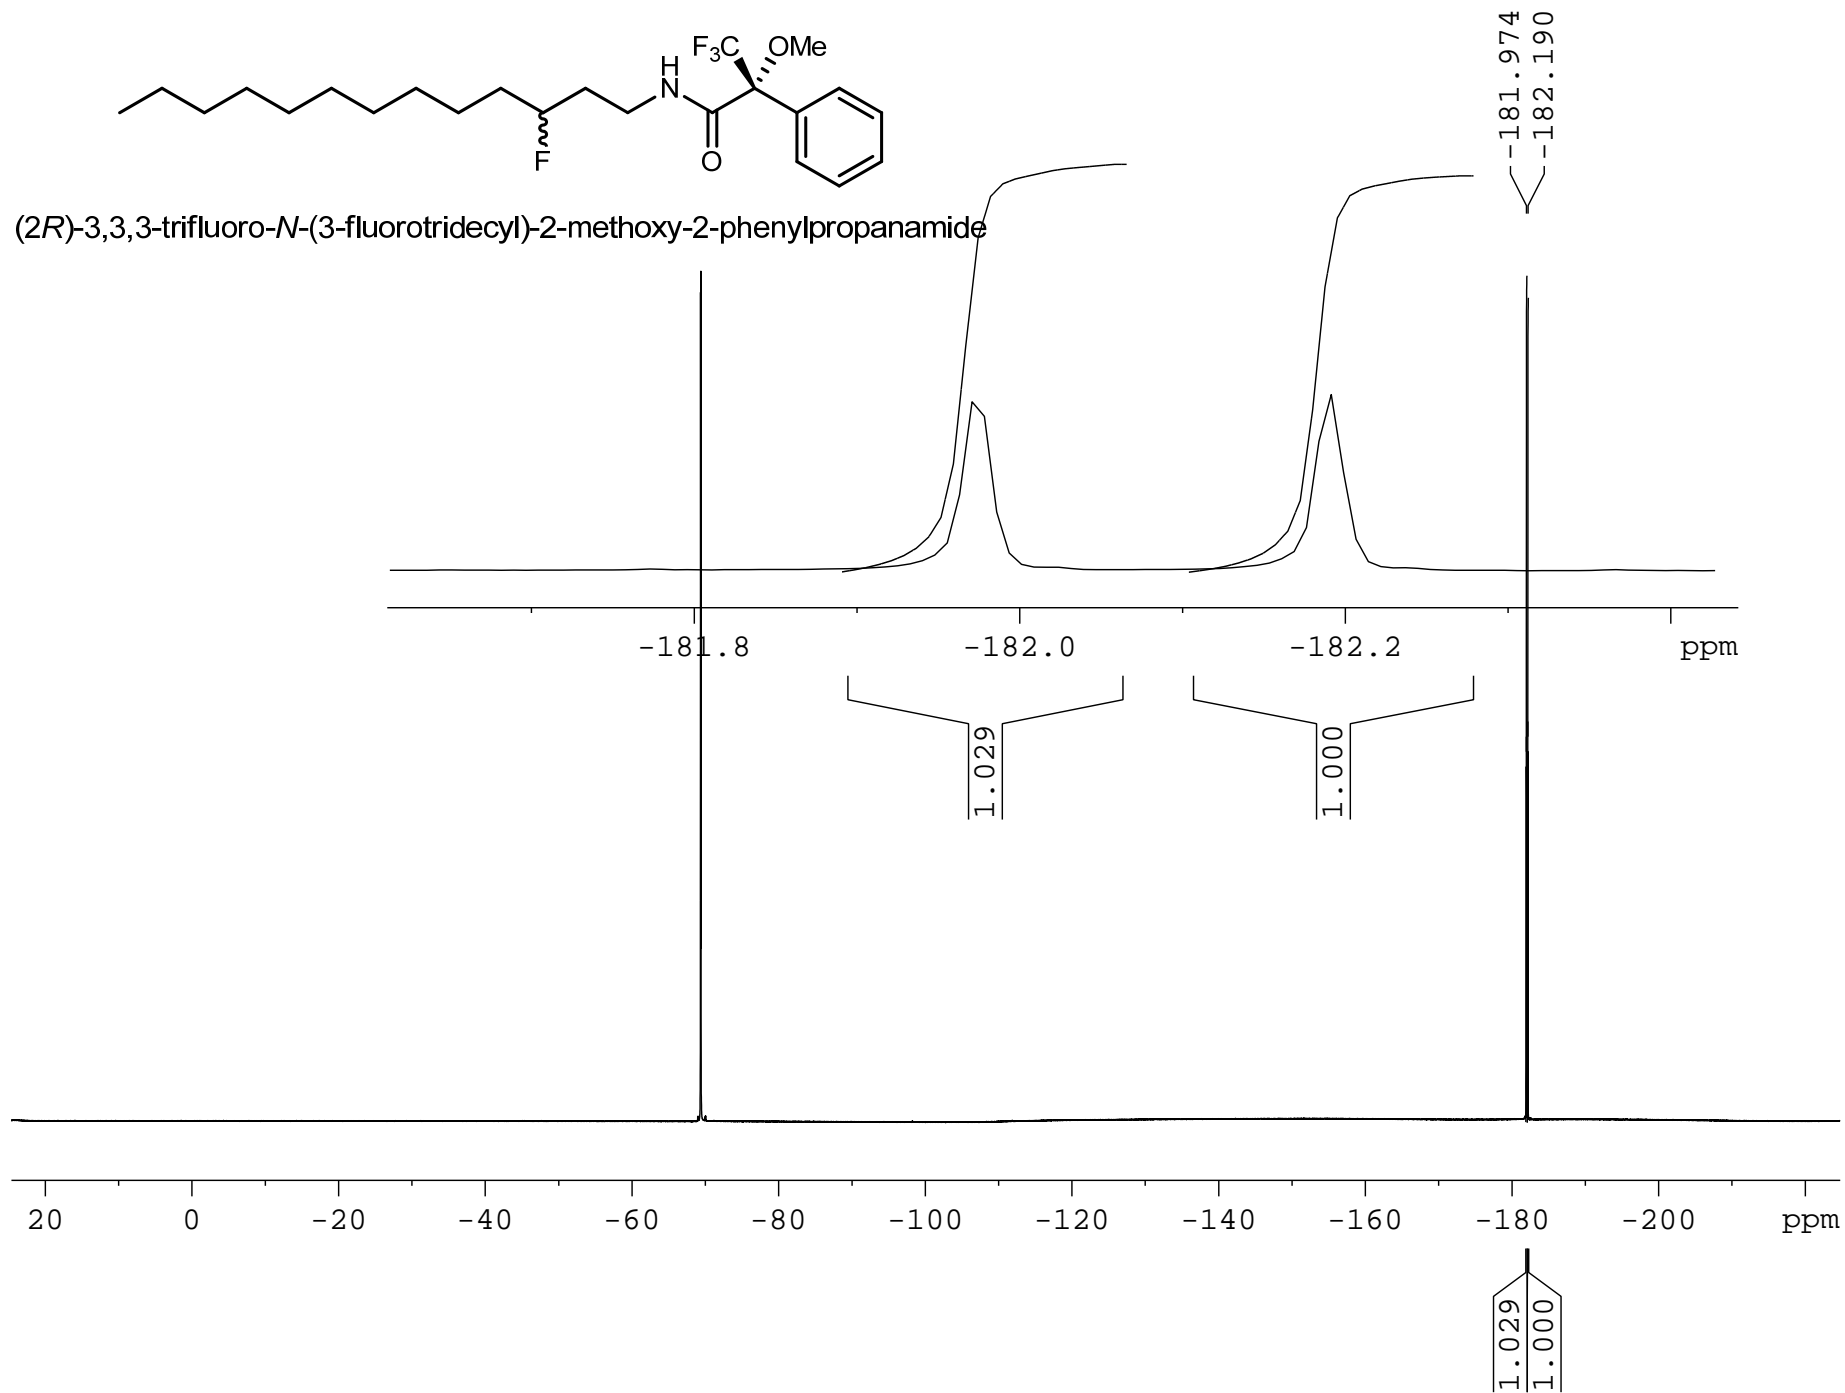

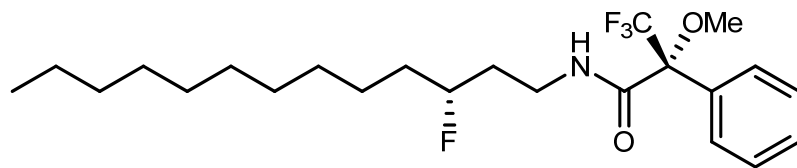

(R)-3,3,3-trifluoro-N-((R)-3-fluorotridecyl)-2-methoxy-2-phenylpropanamide

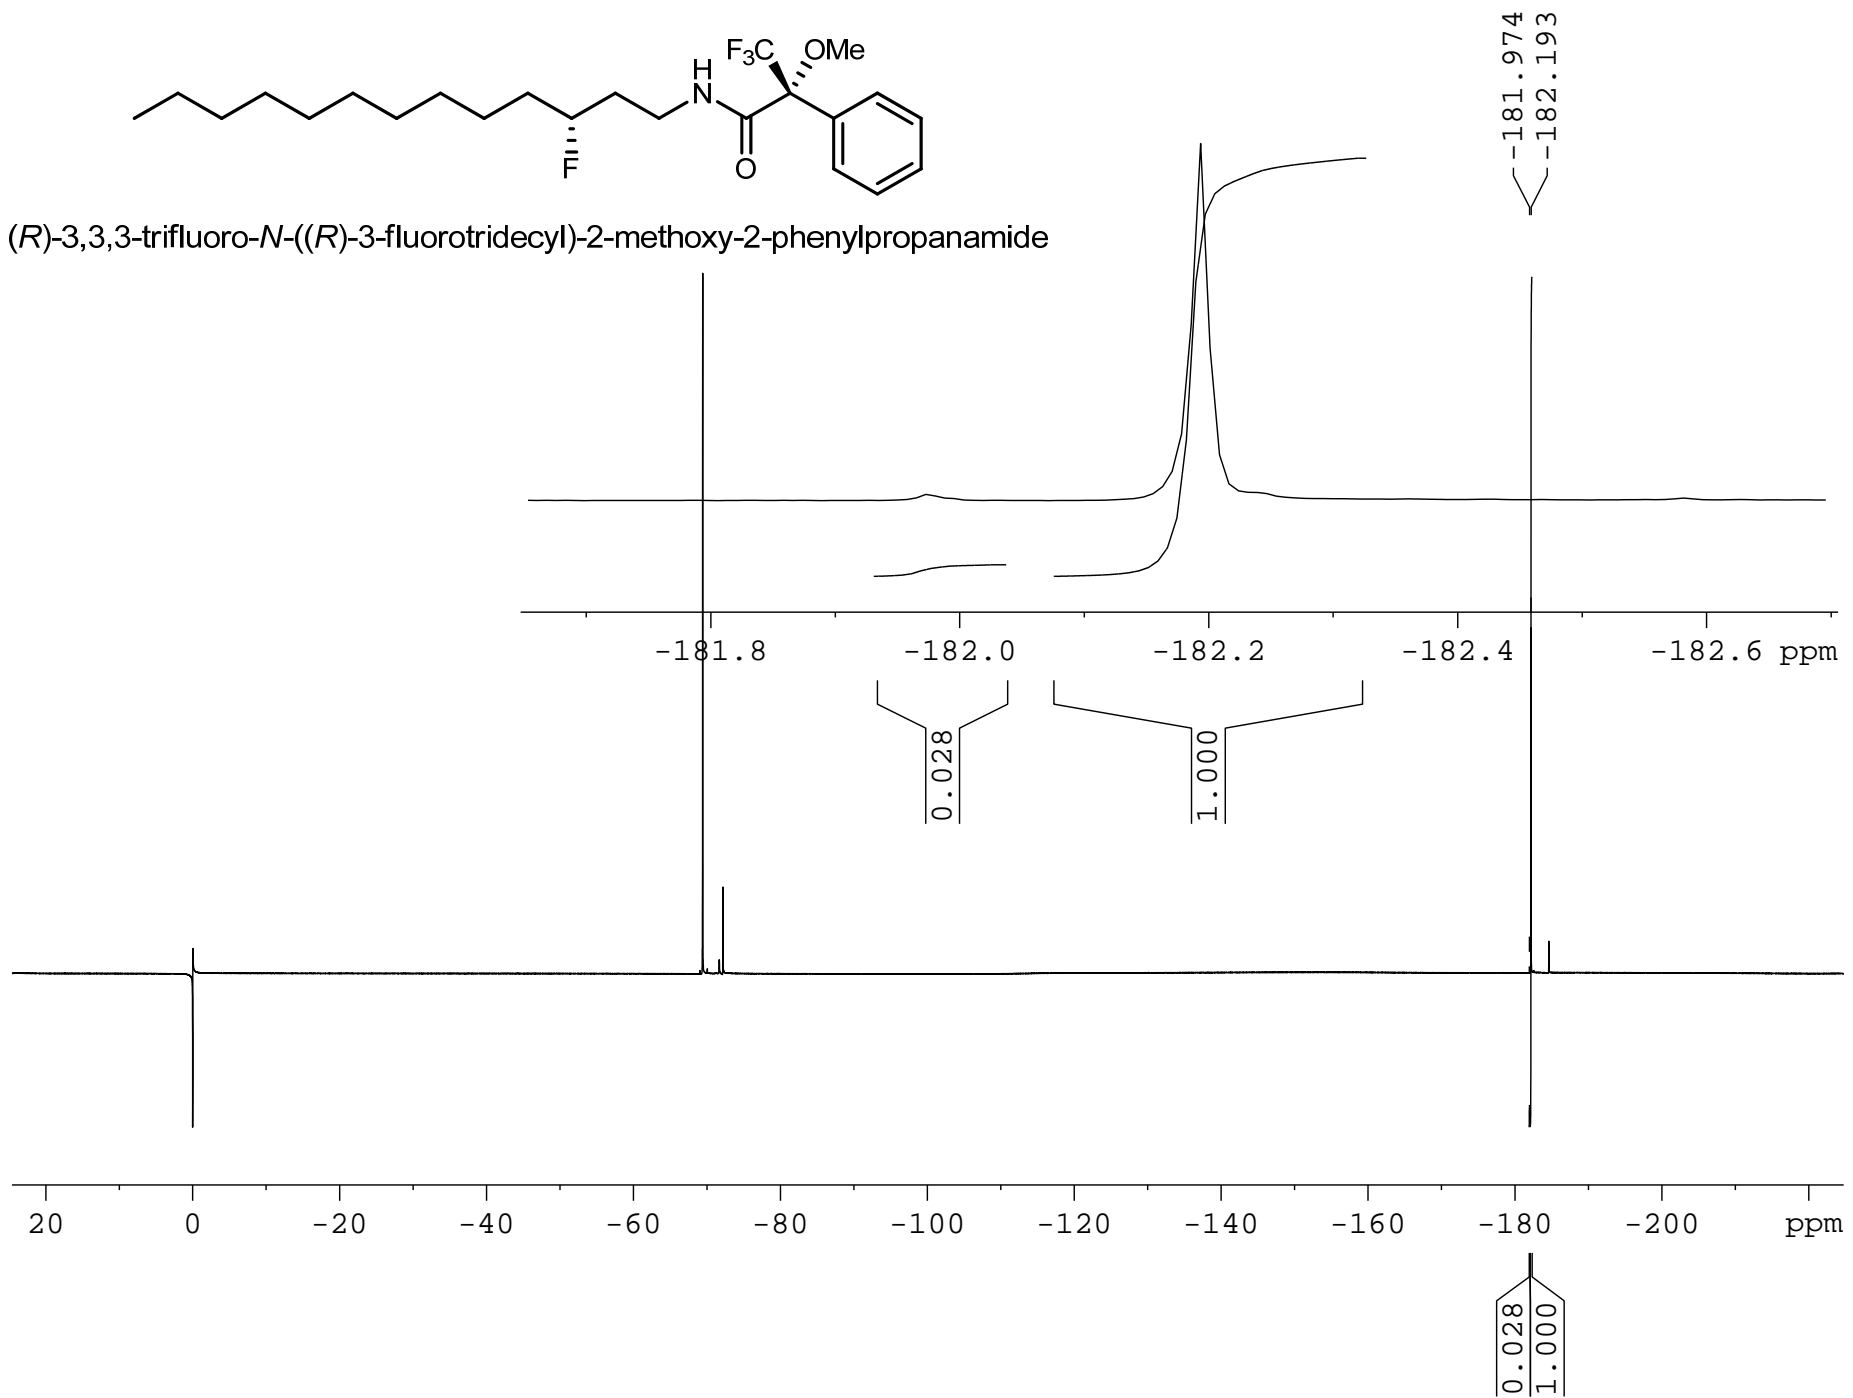

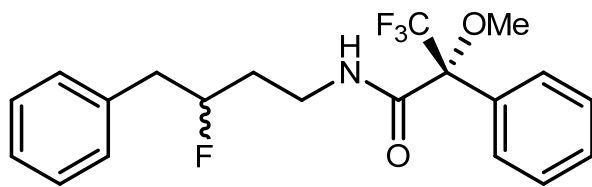

(2R)-3,3,3-trifluoro-N-(3-fluoro-4-phenylbutyl)-2-methoxy-2-phenylpropanamide

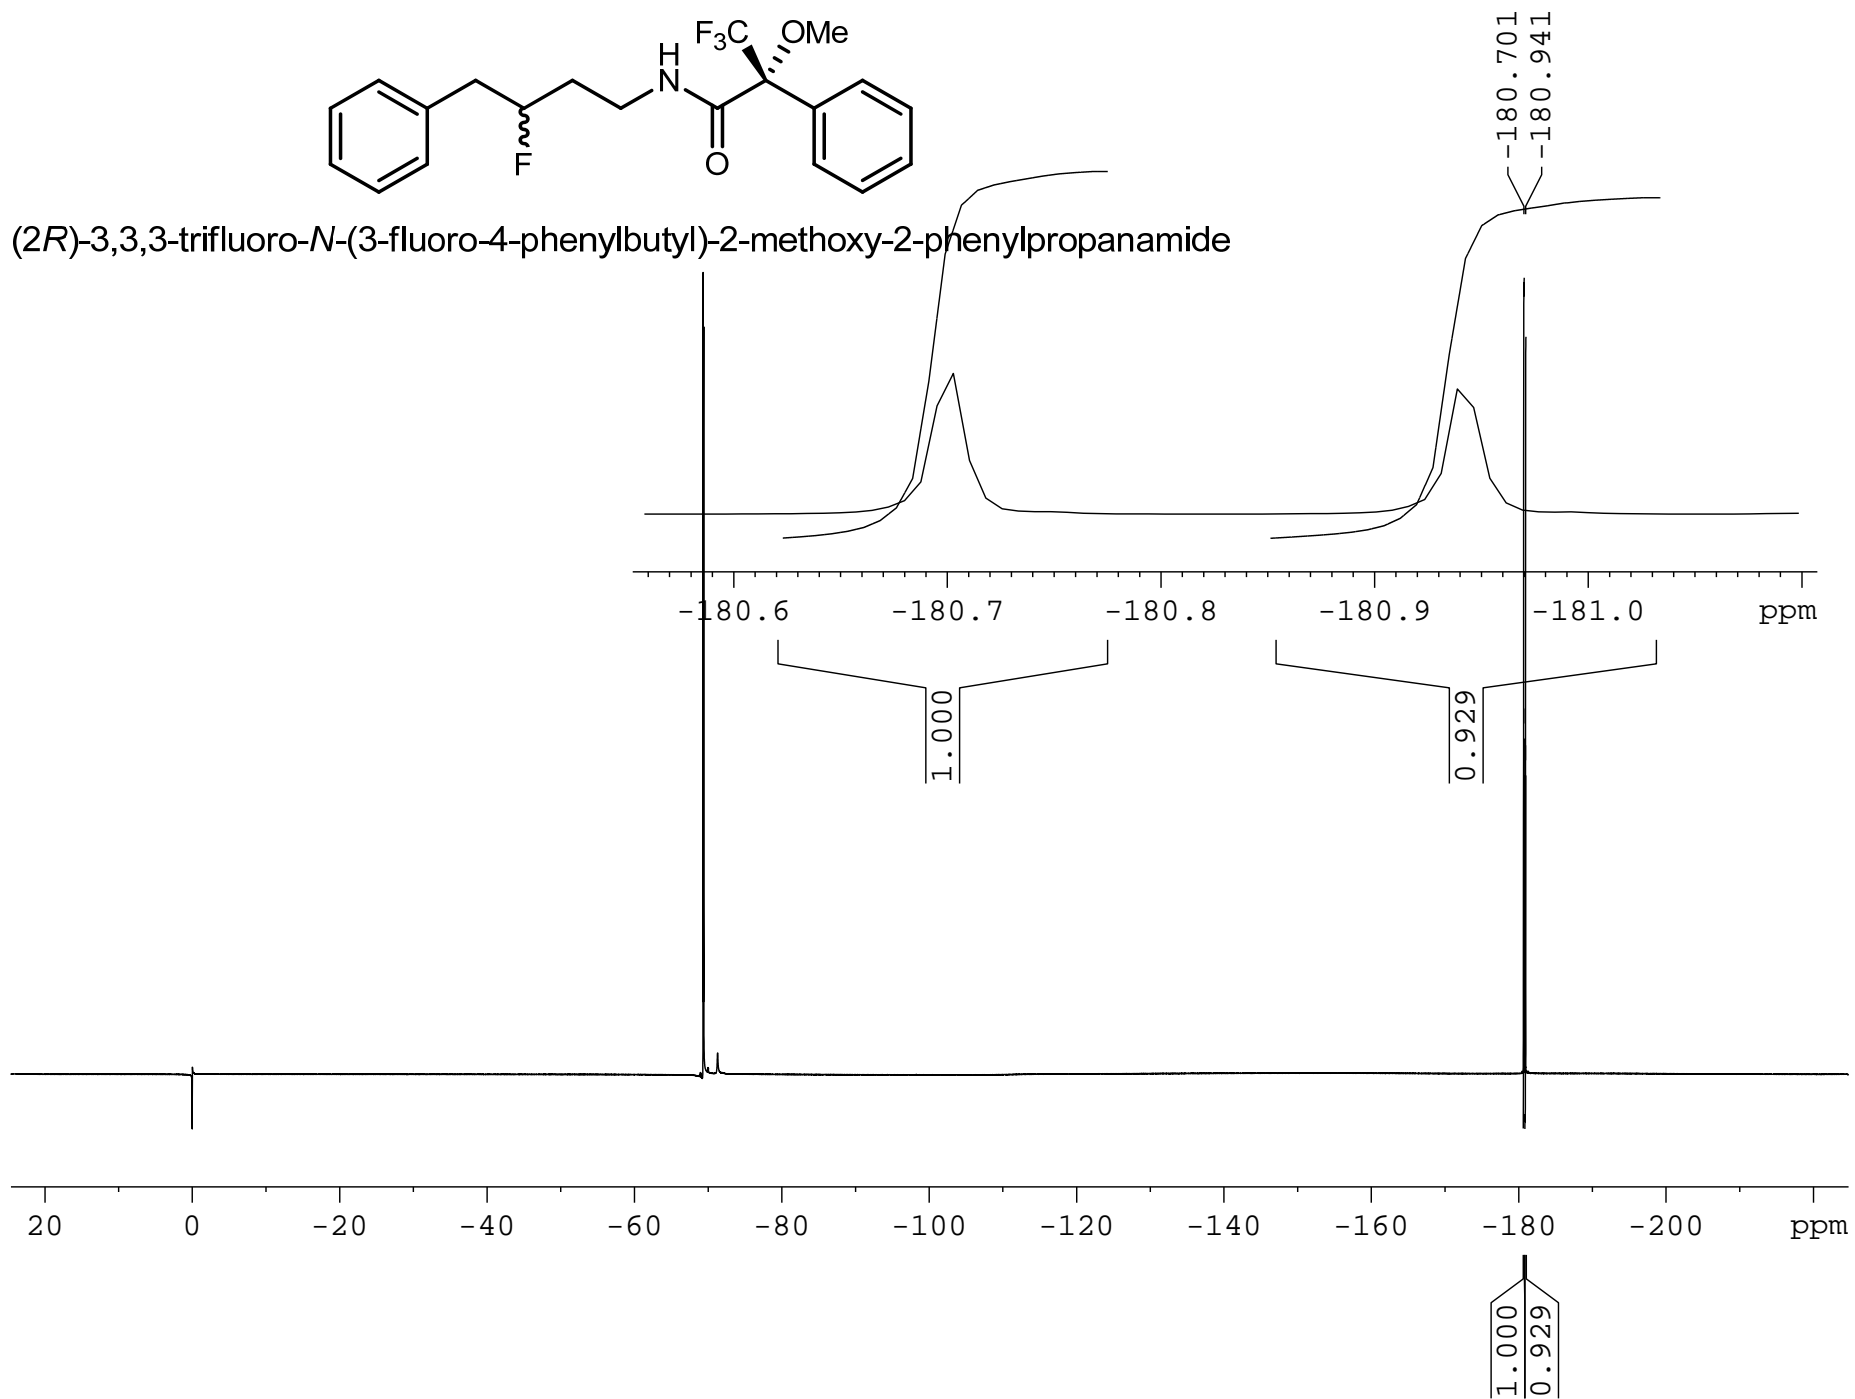



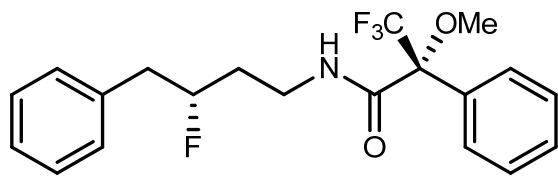

(*R*)-3,3,3-trifluoro-*N*-((*R*)-3-fluoro-4-phenylbutyl)-2-methoxy-2-phenylpropanamide

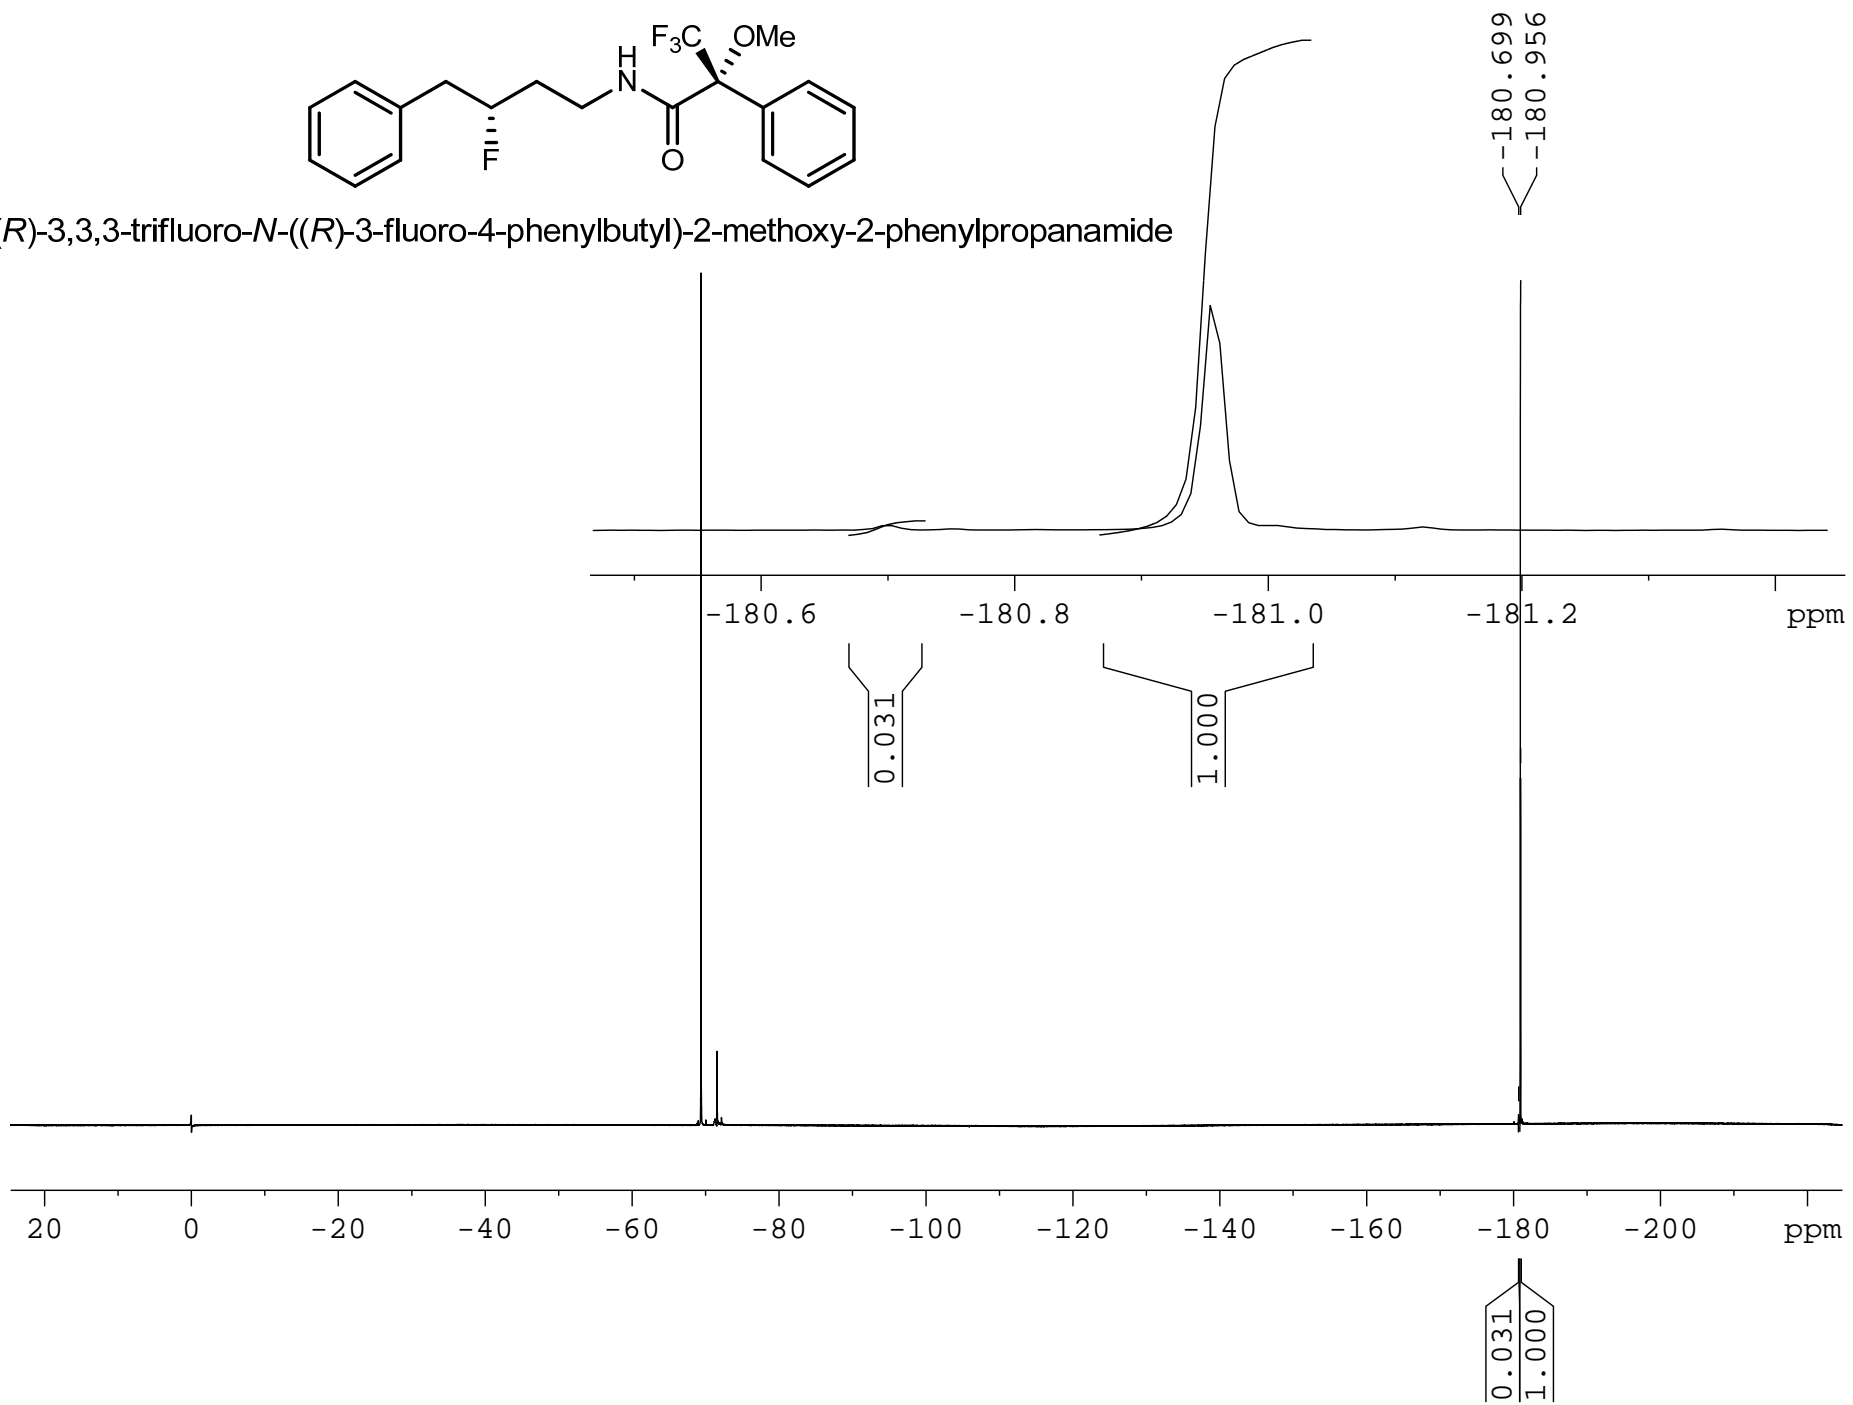

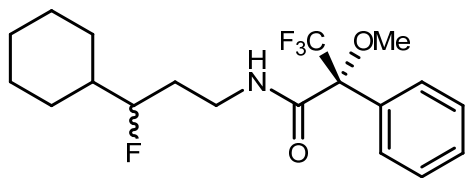

(2R)-N-(3-cyclohexyl-3-fluoropropyl)-3,3,3-trifluoro-2-methoxy-2-phenylpropanamide

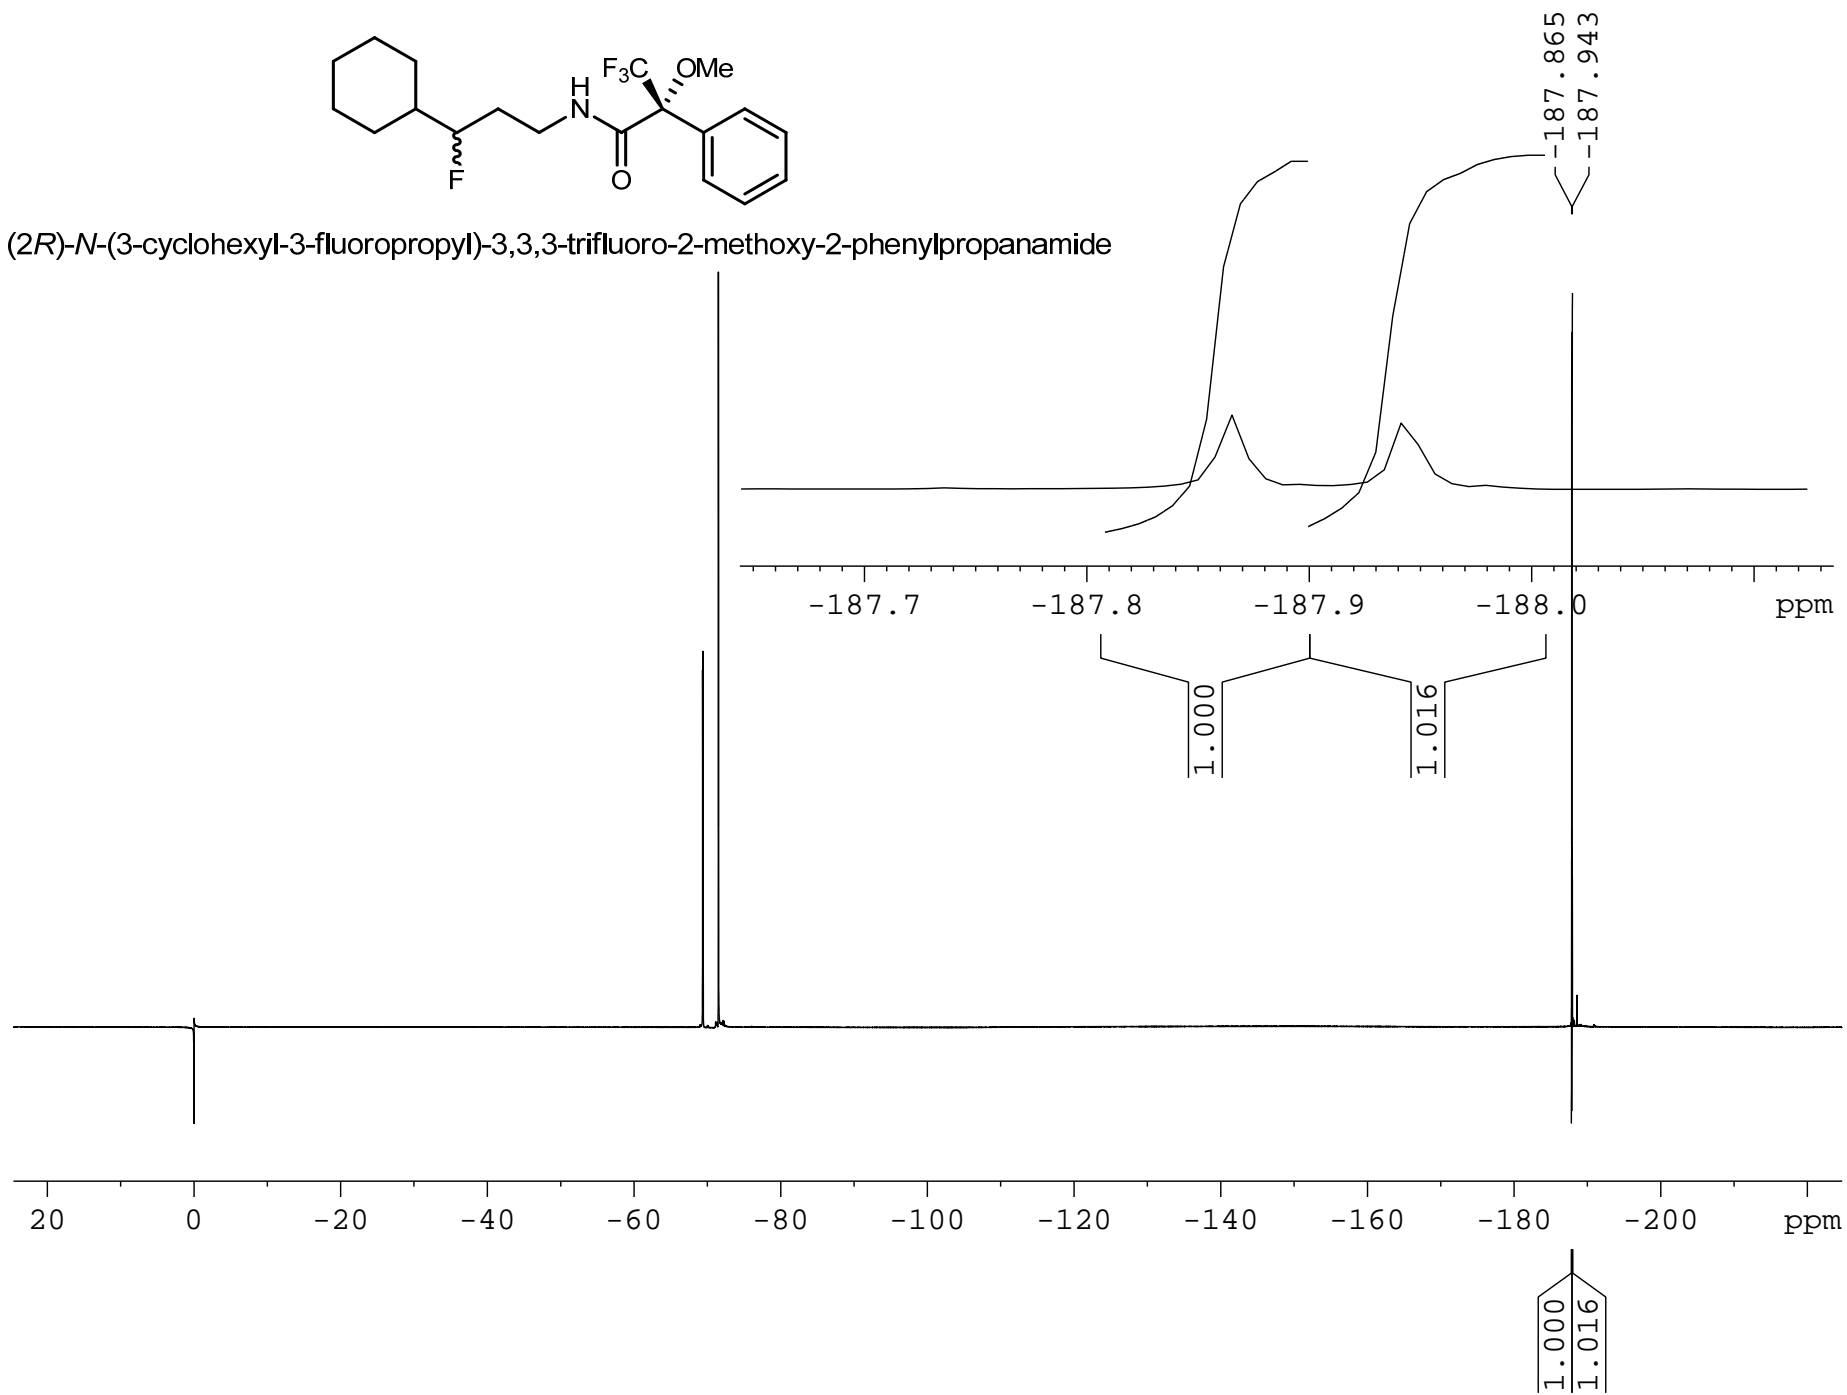

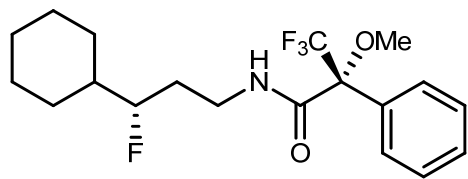

(R)-N-((S)-3-cyclohexyl-3-fluoropropyl)-3,3,3-trifluoro-2-methoxy-2-phenylpropanamide

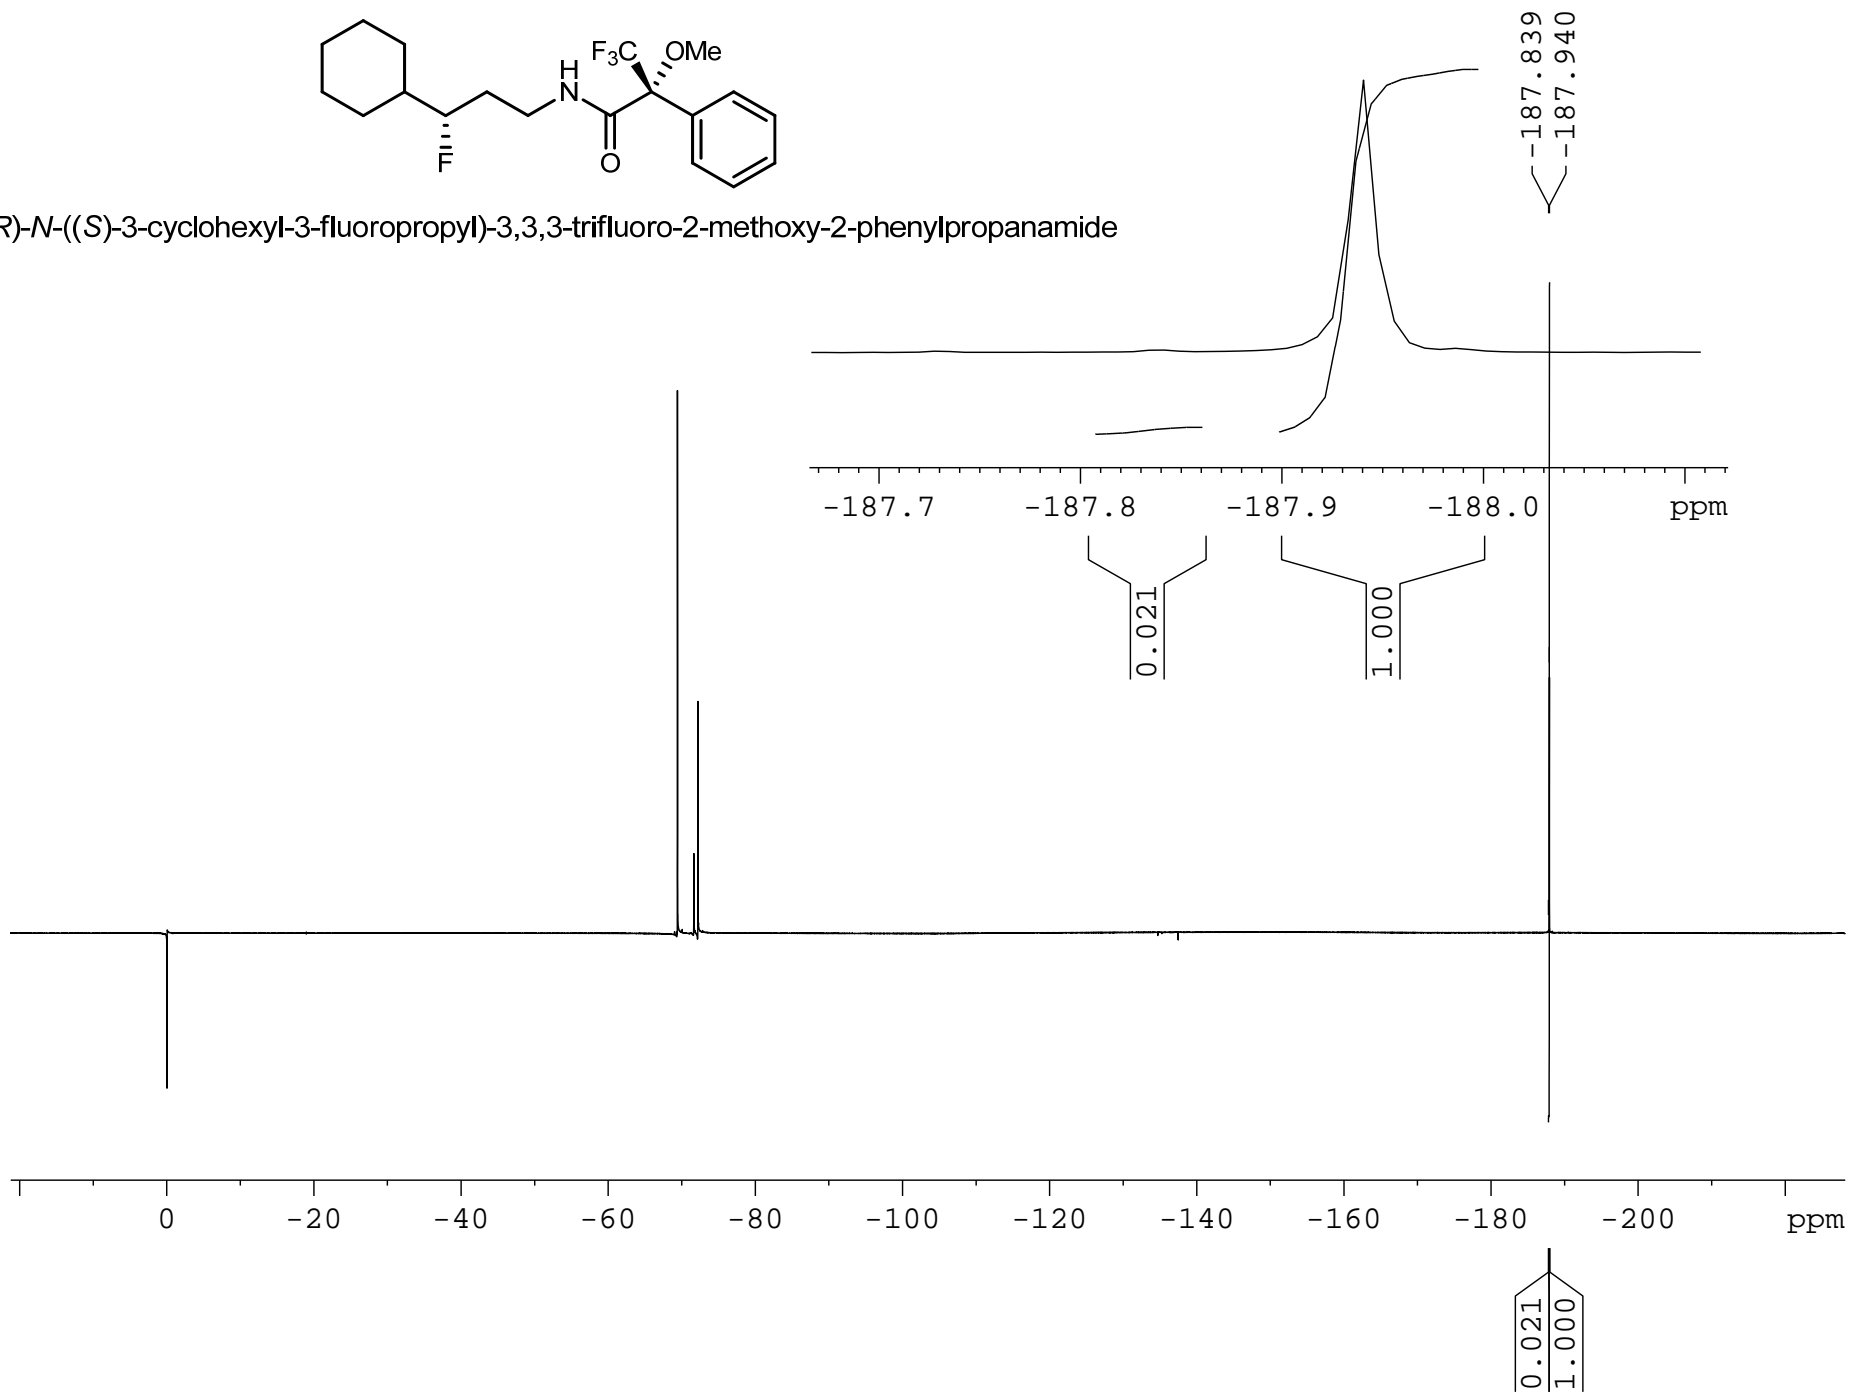

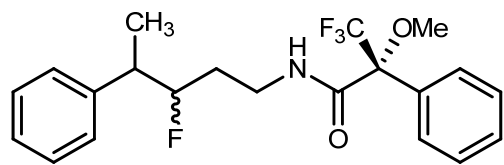

From **3d**

(2*R*)-3,3,3-trifluoro-*N*-(3-fluoro-4-phenylpentyl)-2-methoxy-2-phenylpropanamide

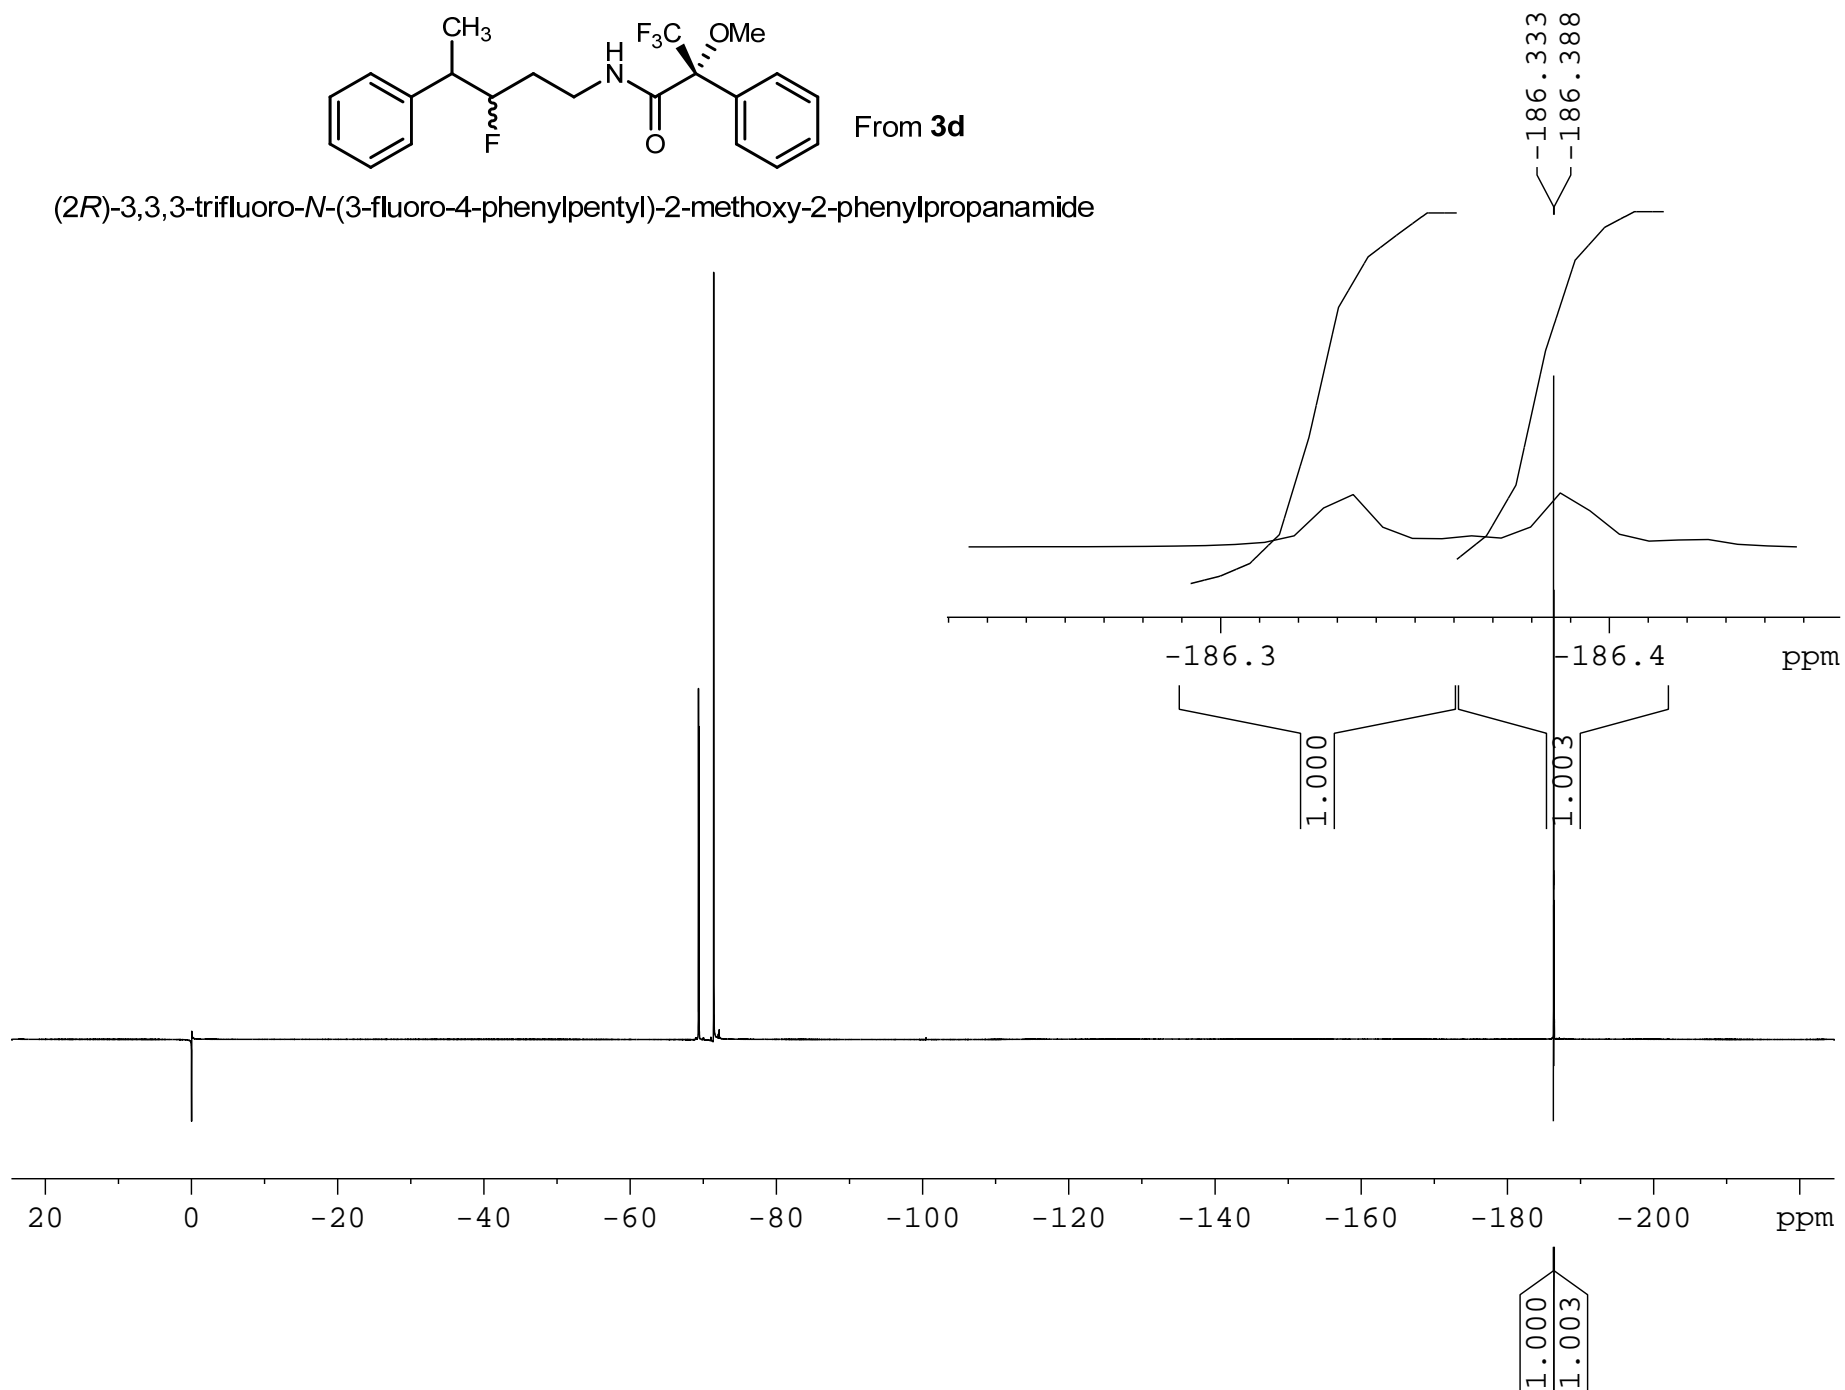

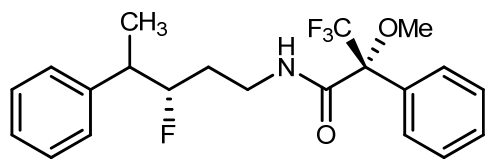

From **3d**

(2*R*)-3,3,3-trifluoro-*N*-((3*S*)-3-fluoro-4-phenylpentyl)-2-methoxy-2-phenylpropanamide

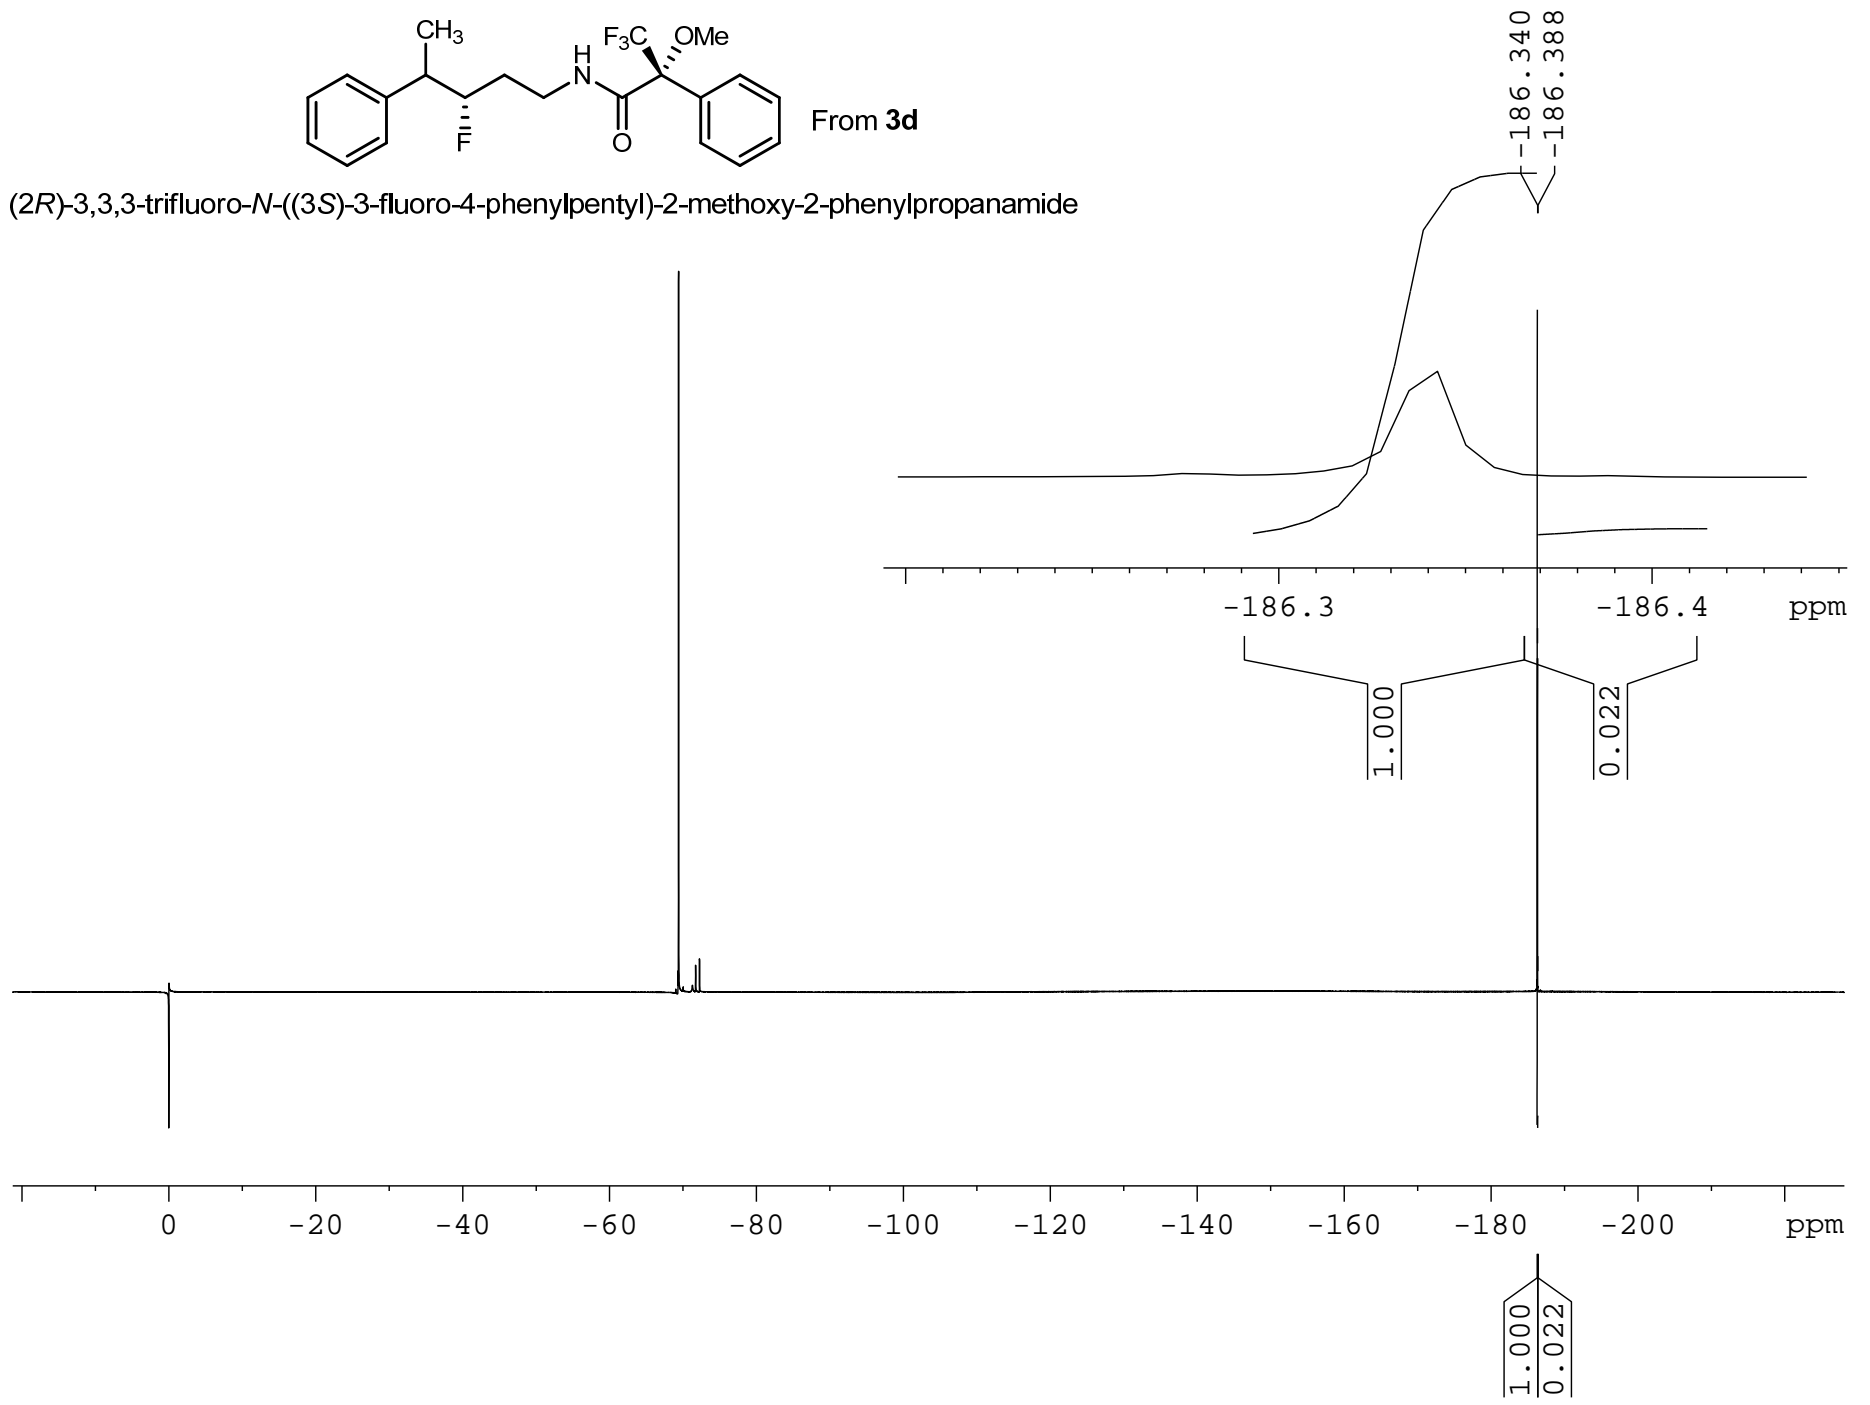

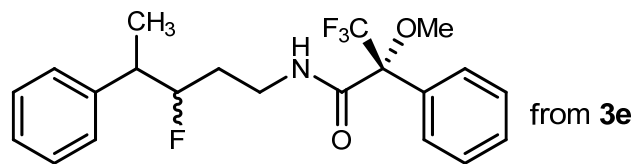

(2*R*)-3,3,3-trifluoro-*N*-(3-fluoro-4-phenylpentyl)-2-methoxy-2-phenylpropanamide

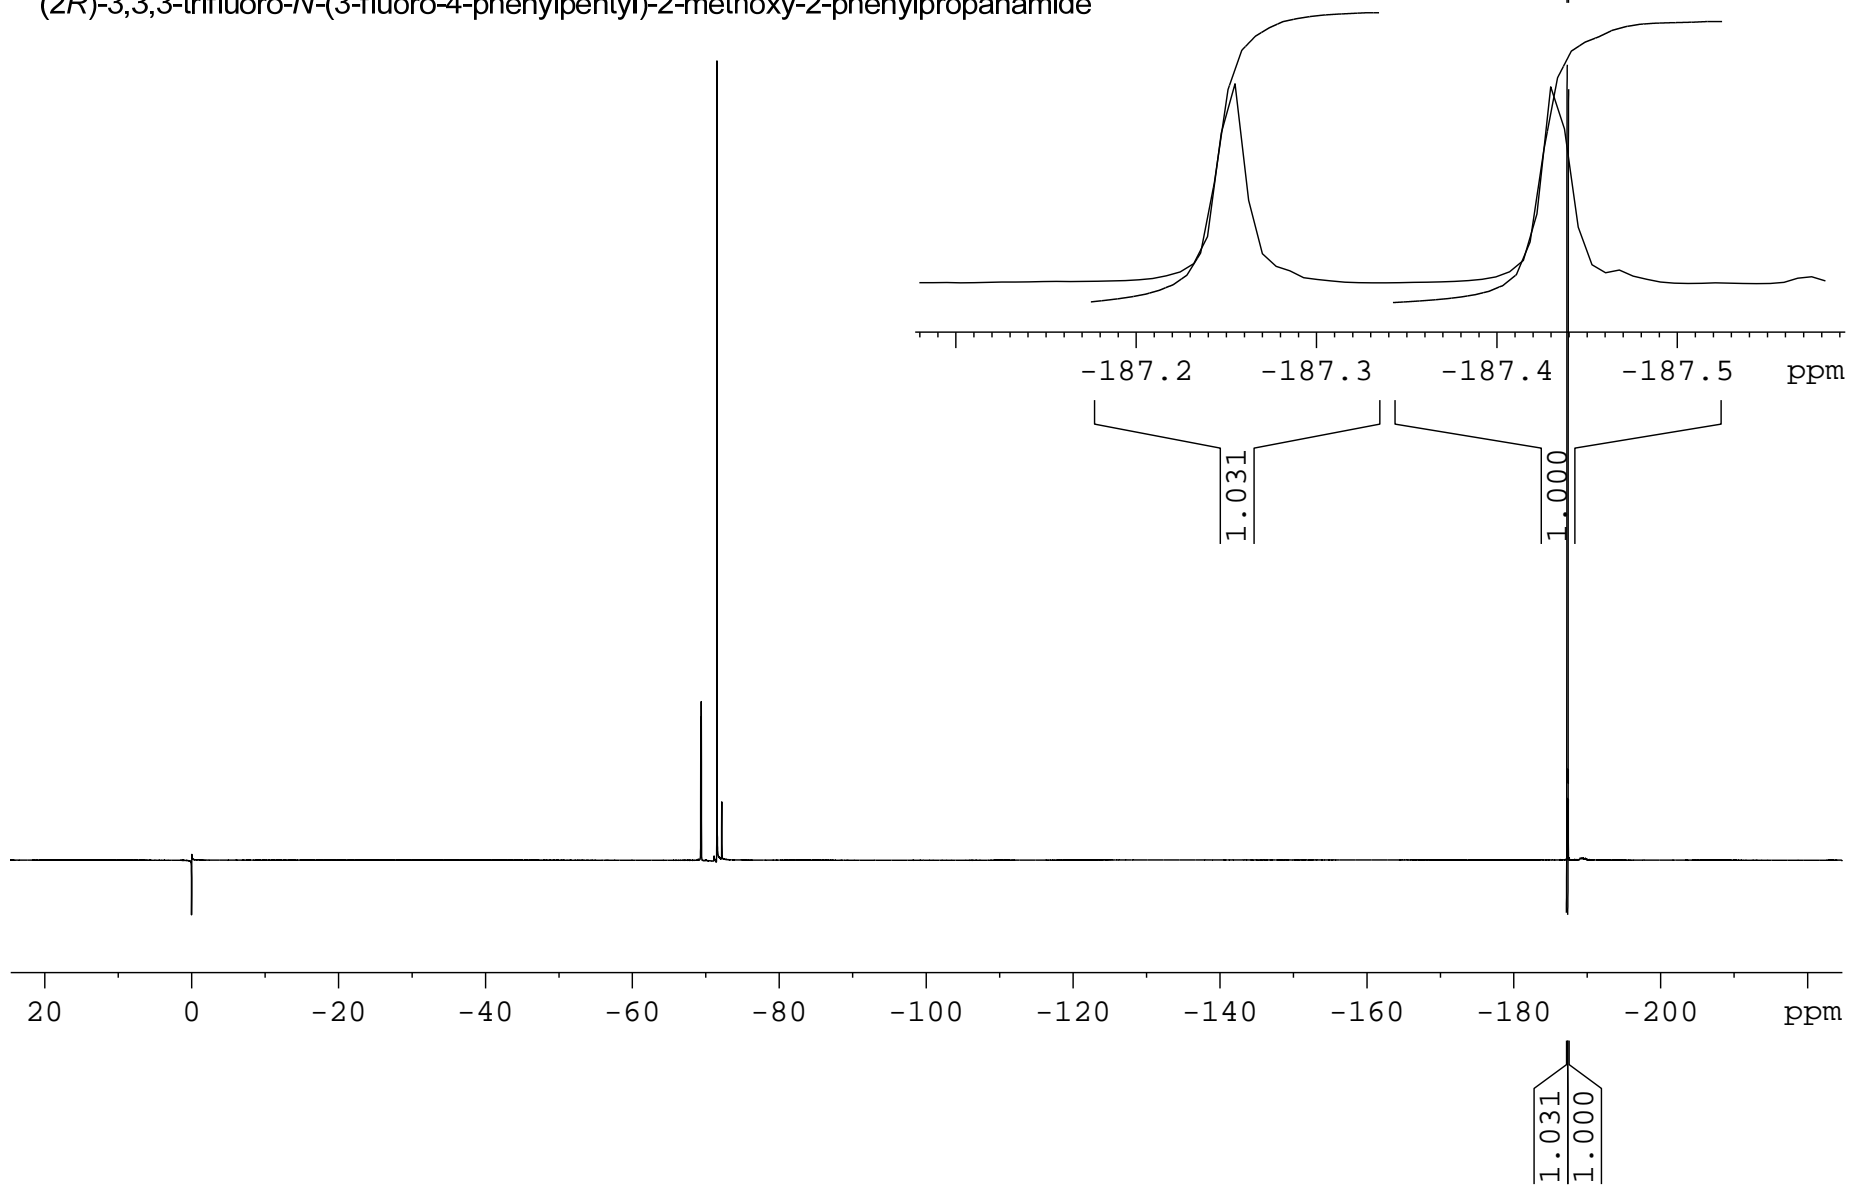

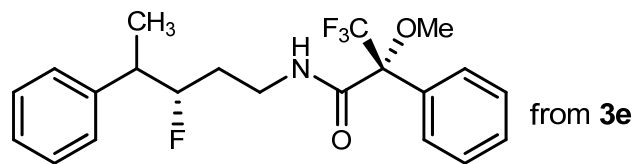

(2*R*)-3,3,3-trifluoro-*N*-((3*S*)-3-fluoro-4-phenylpentyl)-2-methoxy-2-phenylpropanamide

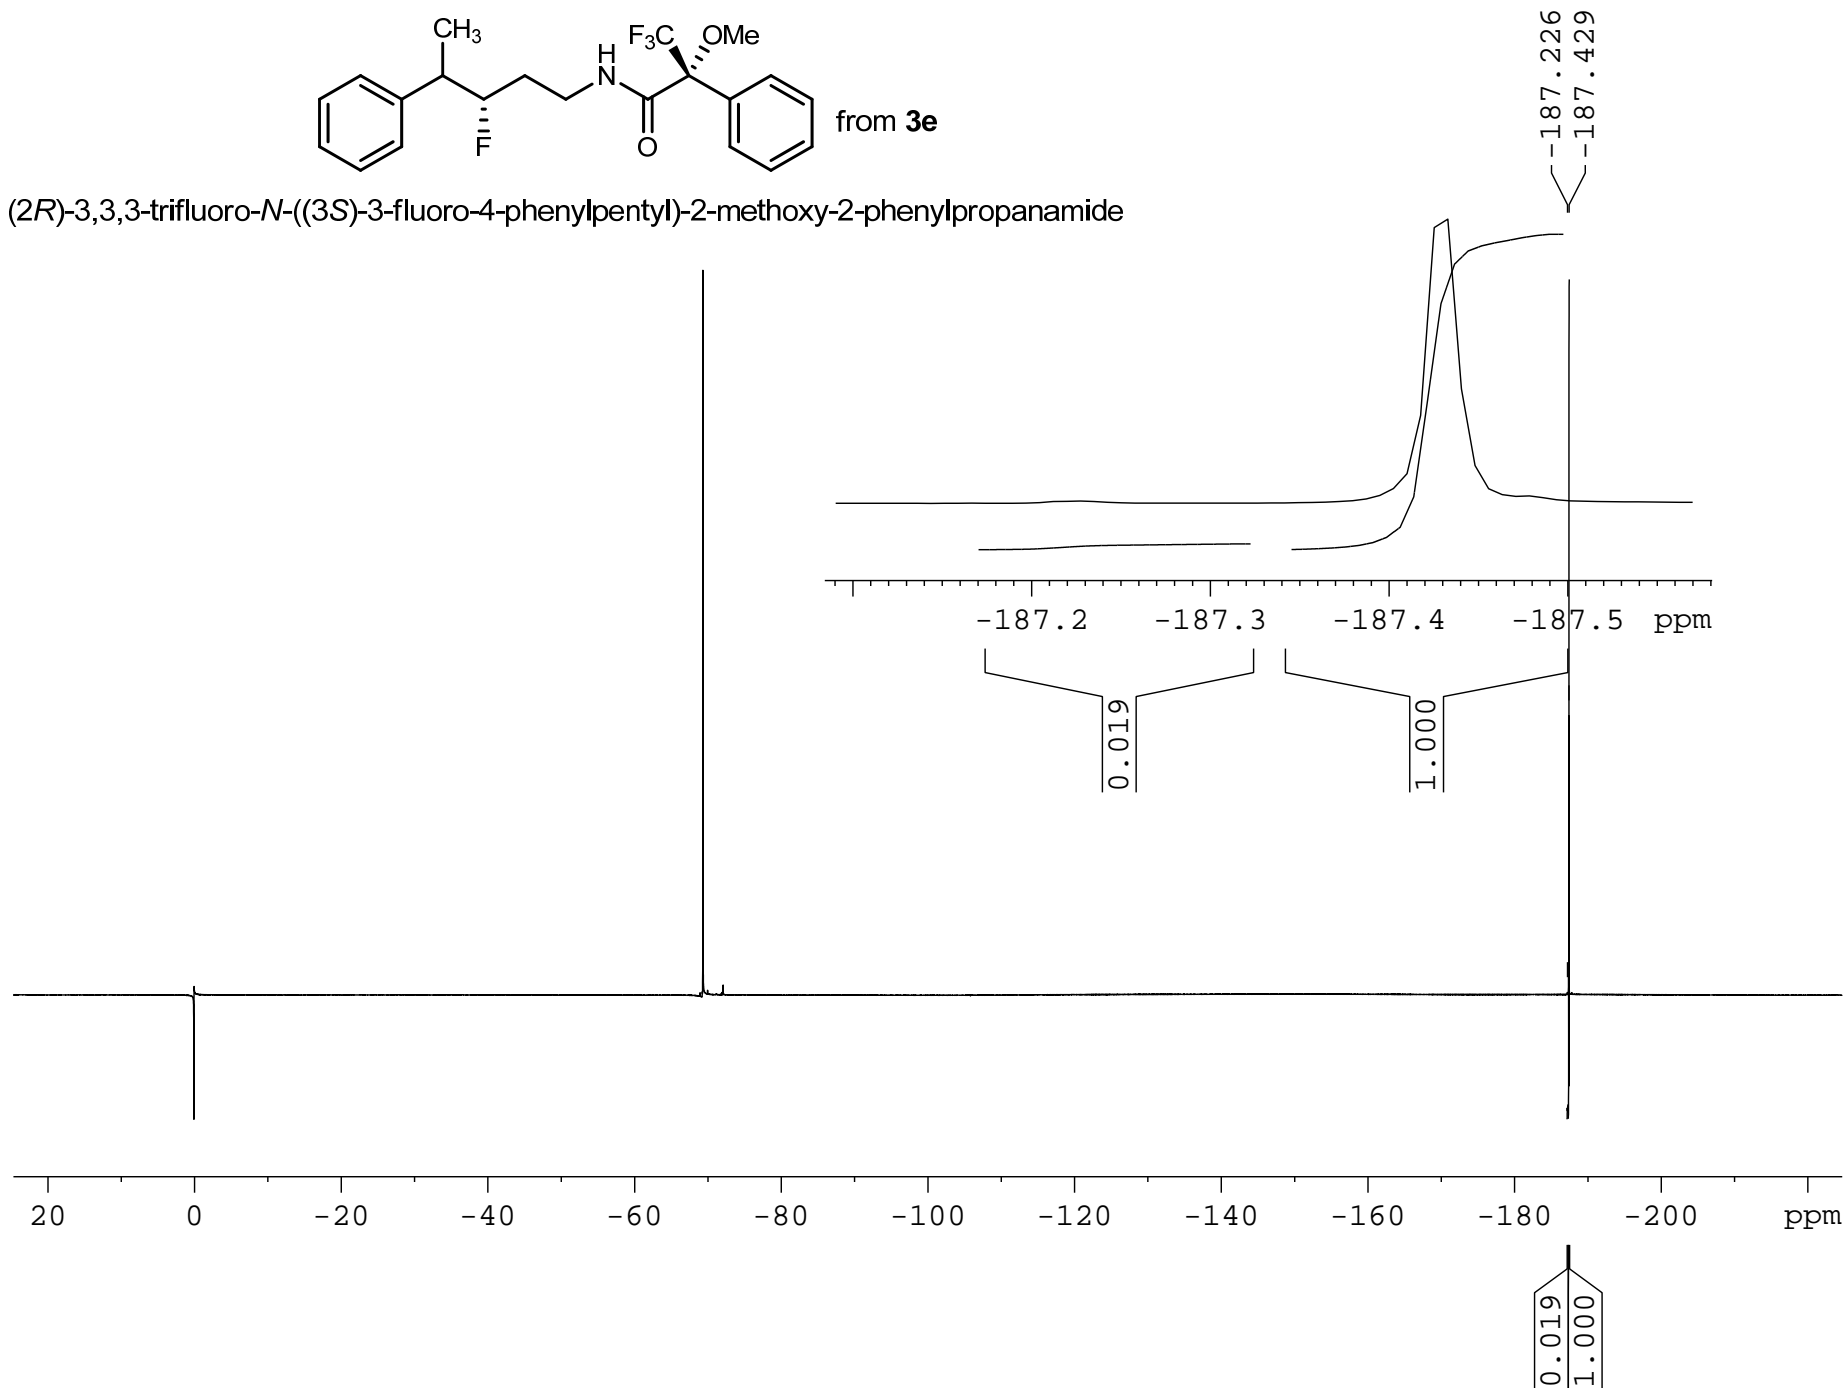

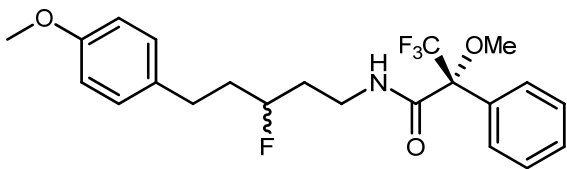

(2R)-3,3,3-trifluoro-N-(3-fluoro-5-(4-methoxyphenyl)pentyl)-2-methoxy-2-phenylpropanamide

-184.1116  
 -184.154  
 -184.274  
 -184.313

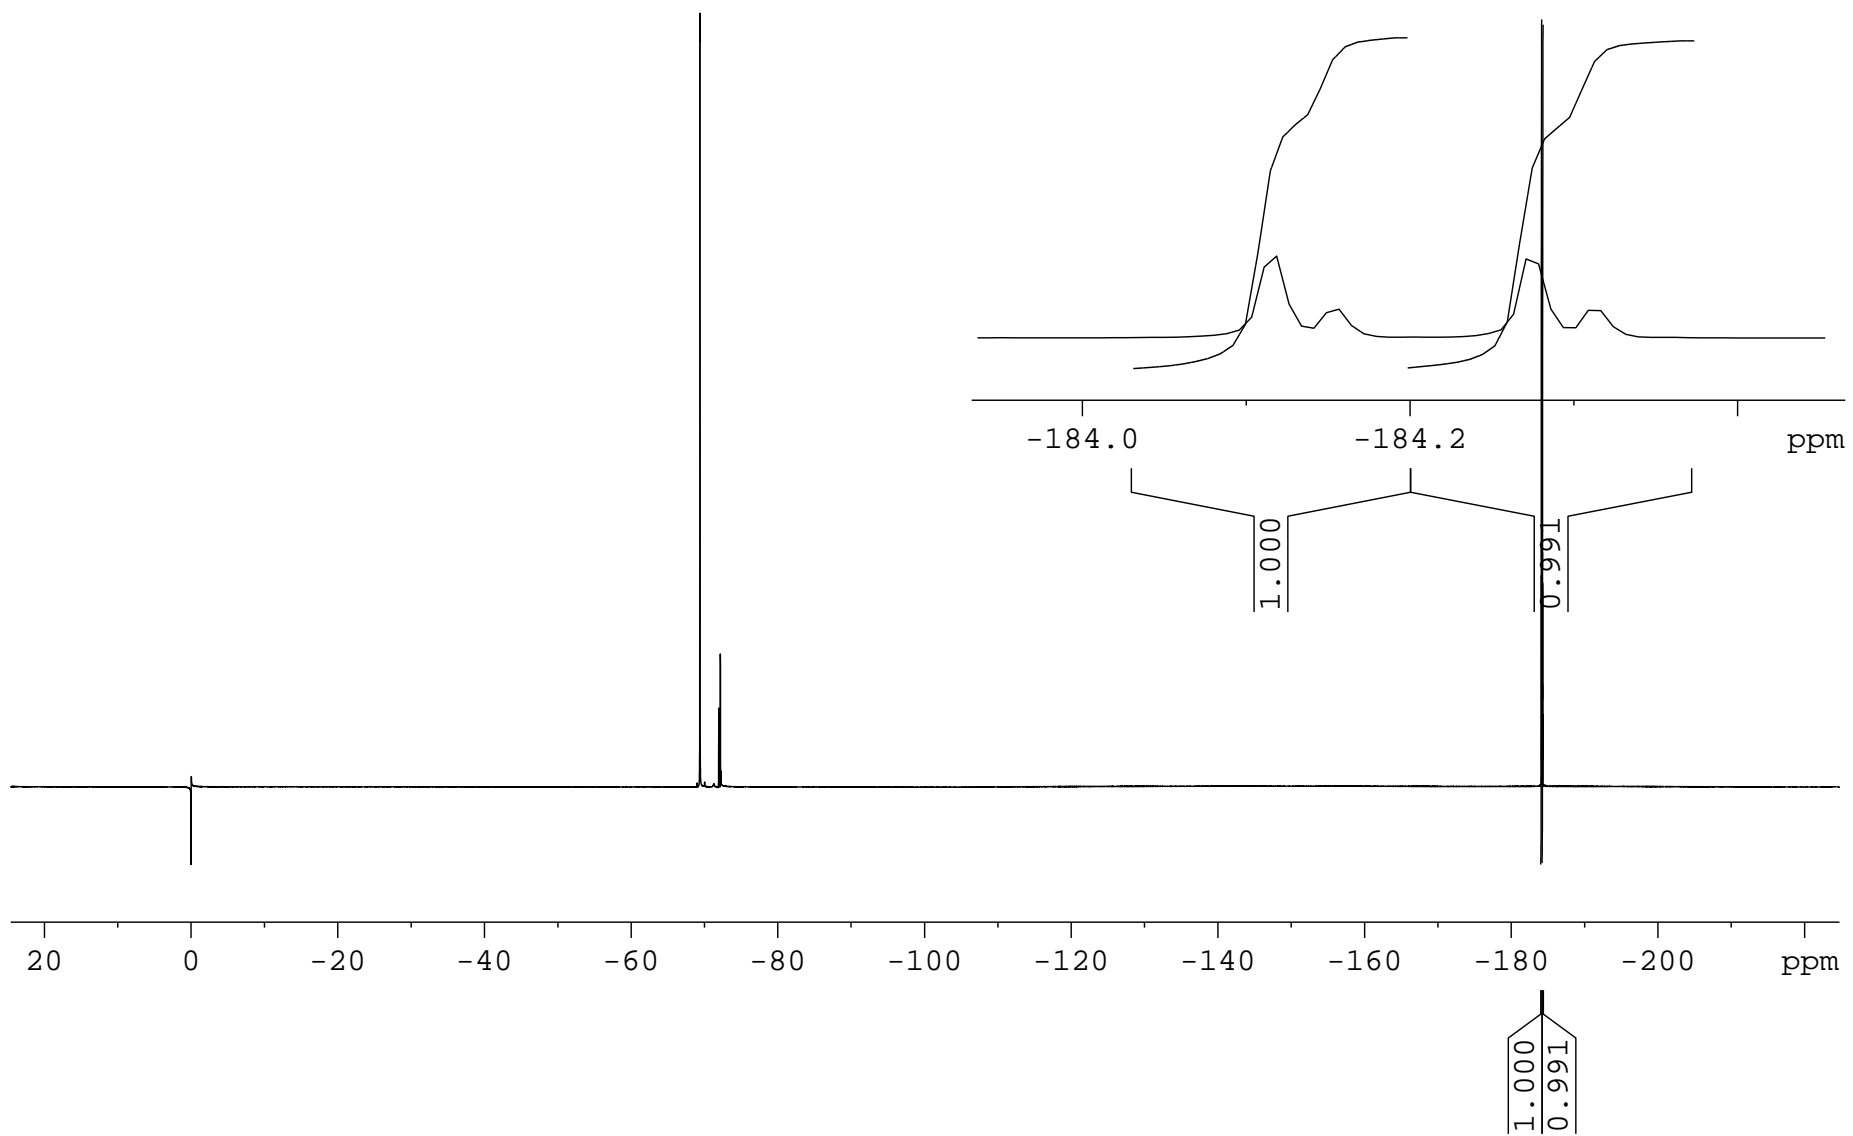



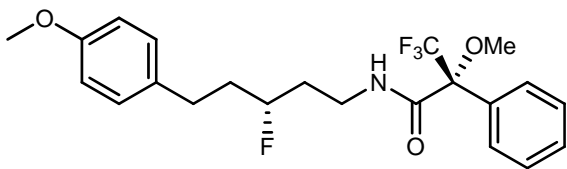

(R)-3,3,3-trifluoro-N-((R)-3-fluoro-5-(4-methoxyphenyl)pentyl)-2-methoxy-2-phenylpropanamide

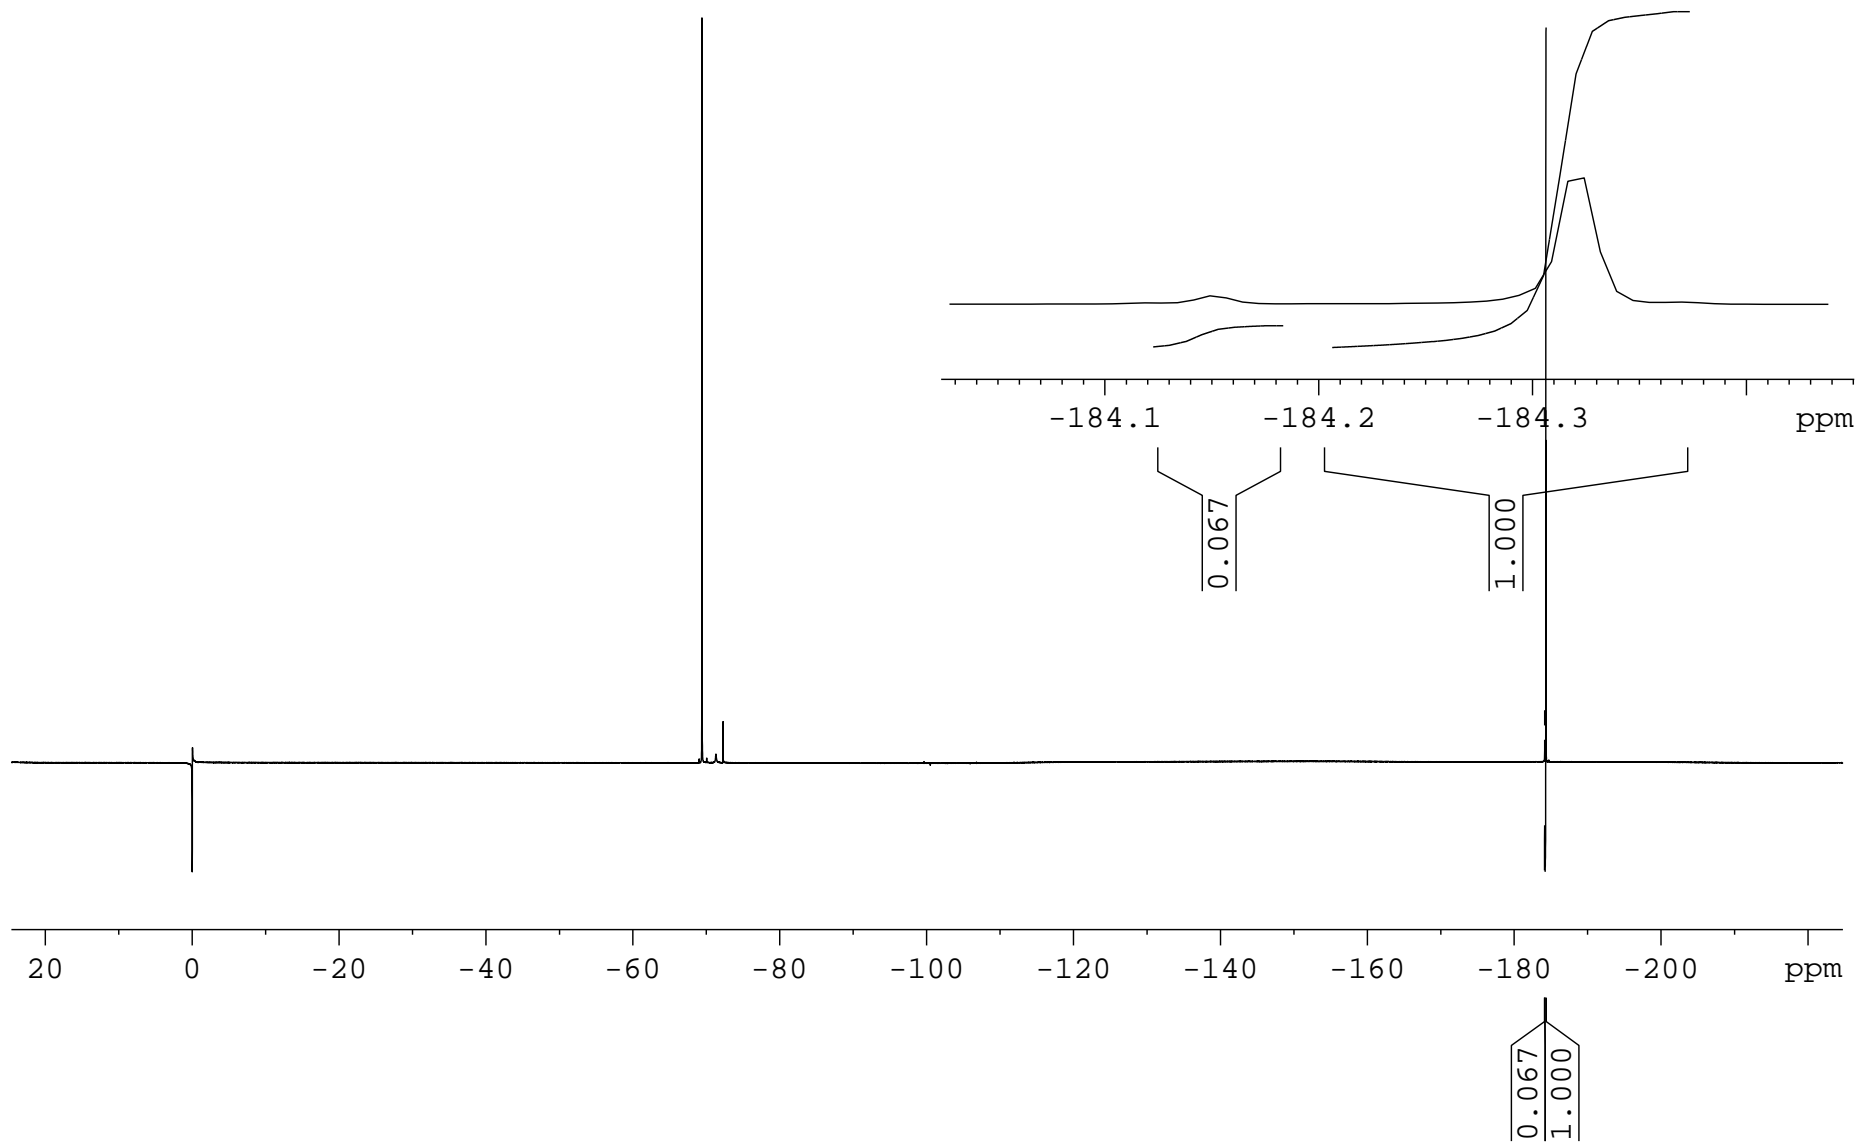

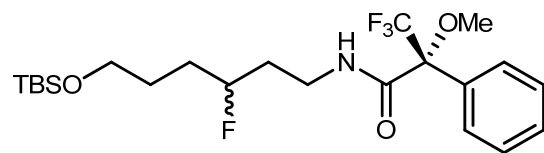

(2R)-N-(6-((*tert*-butyldimethylsilyl)oxy)-3-fluorohexyl)-3,3,3-trifluoro-2-methoxy-2-phenylpropanamide

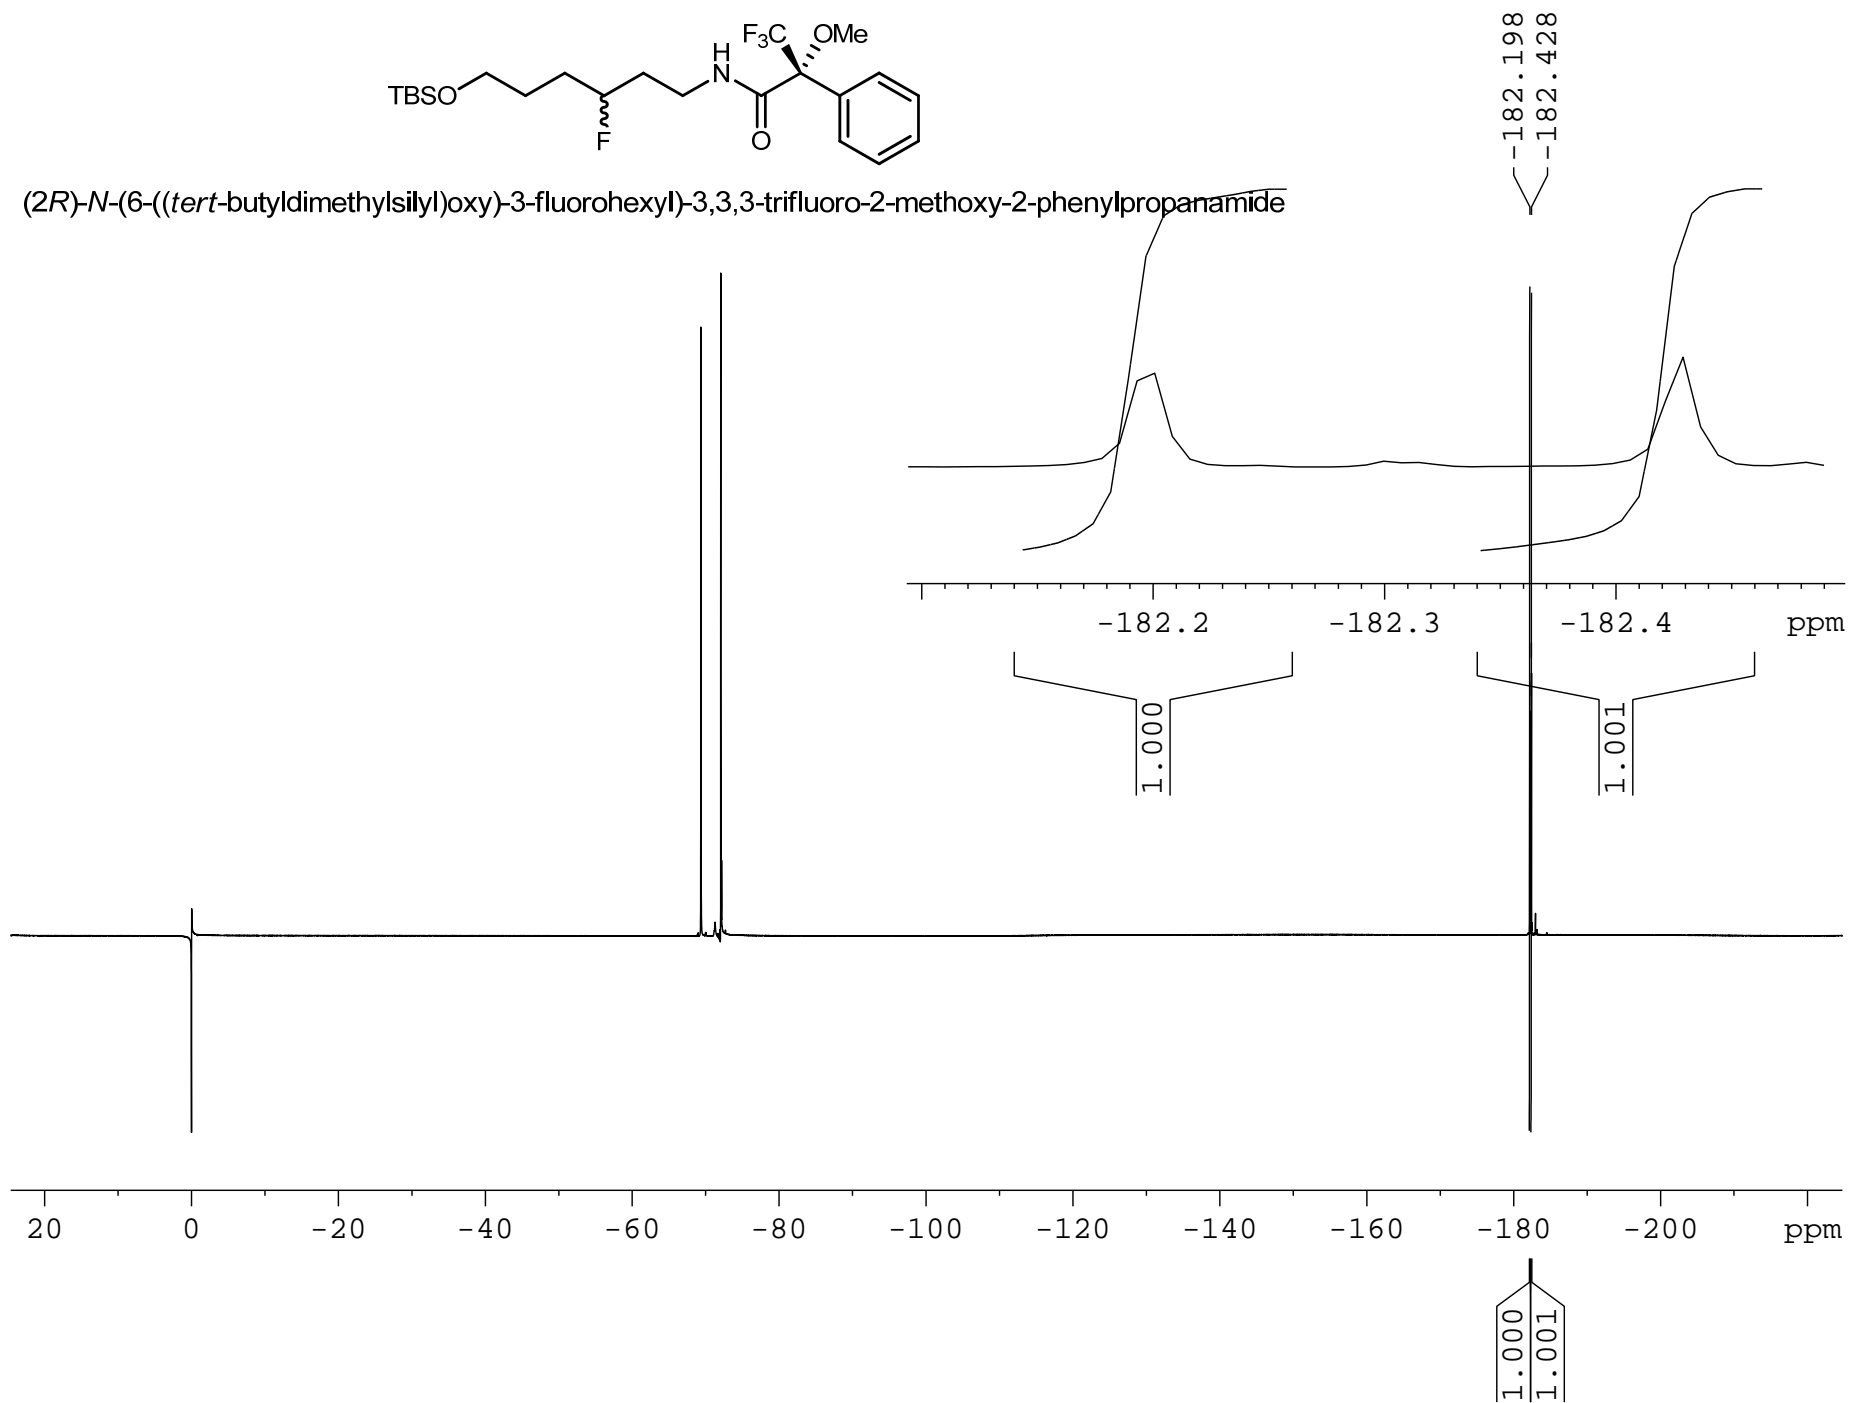

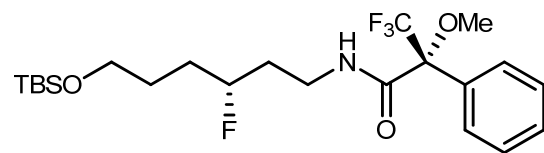

(R)-N-((R)-6-((*tert*-butyldimethylsilyl)oxy)-3-fluorohexyl)-3,3,3-trifluoro-2-methoxy-2-phenylpropanamide

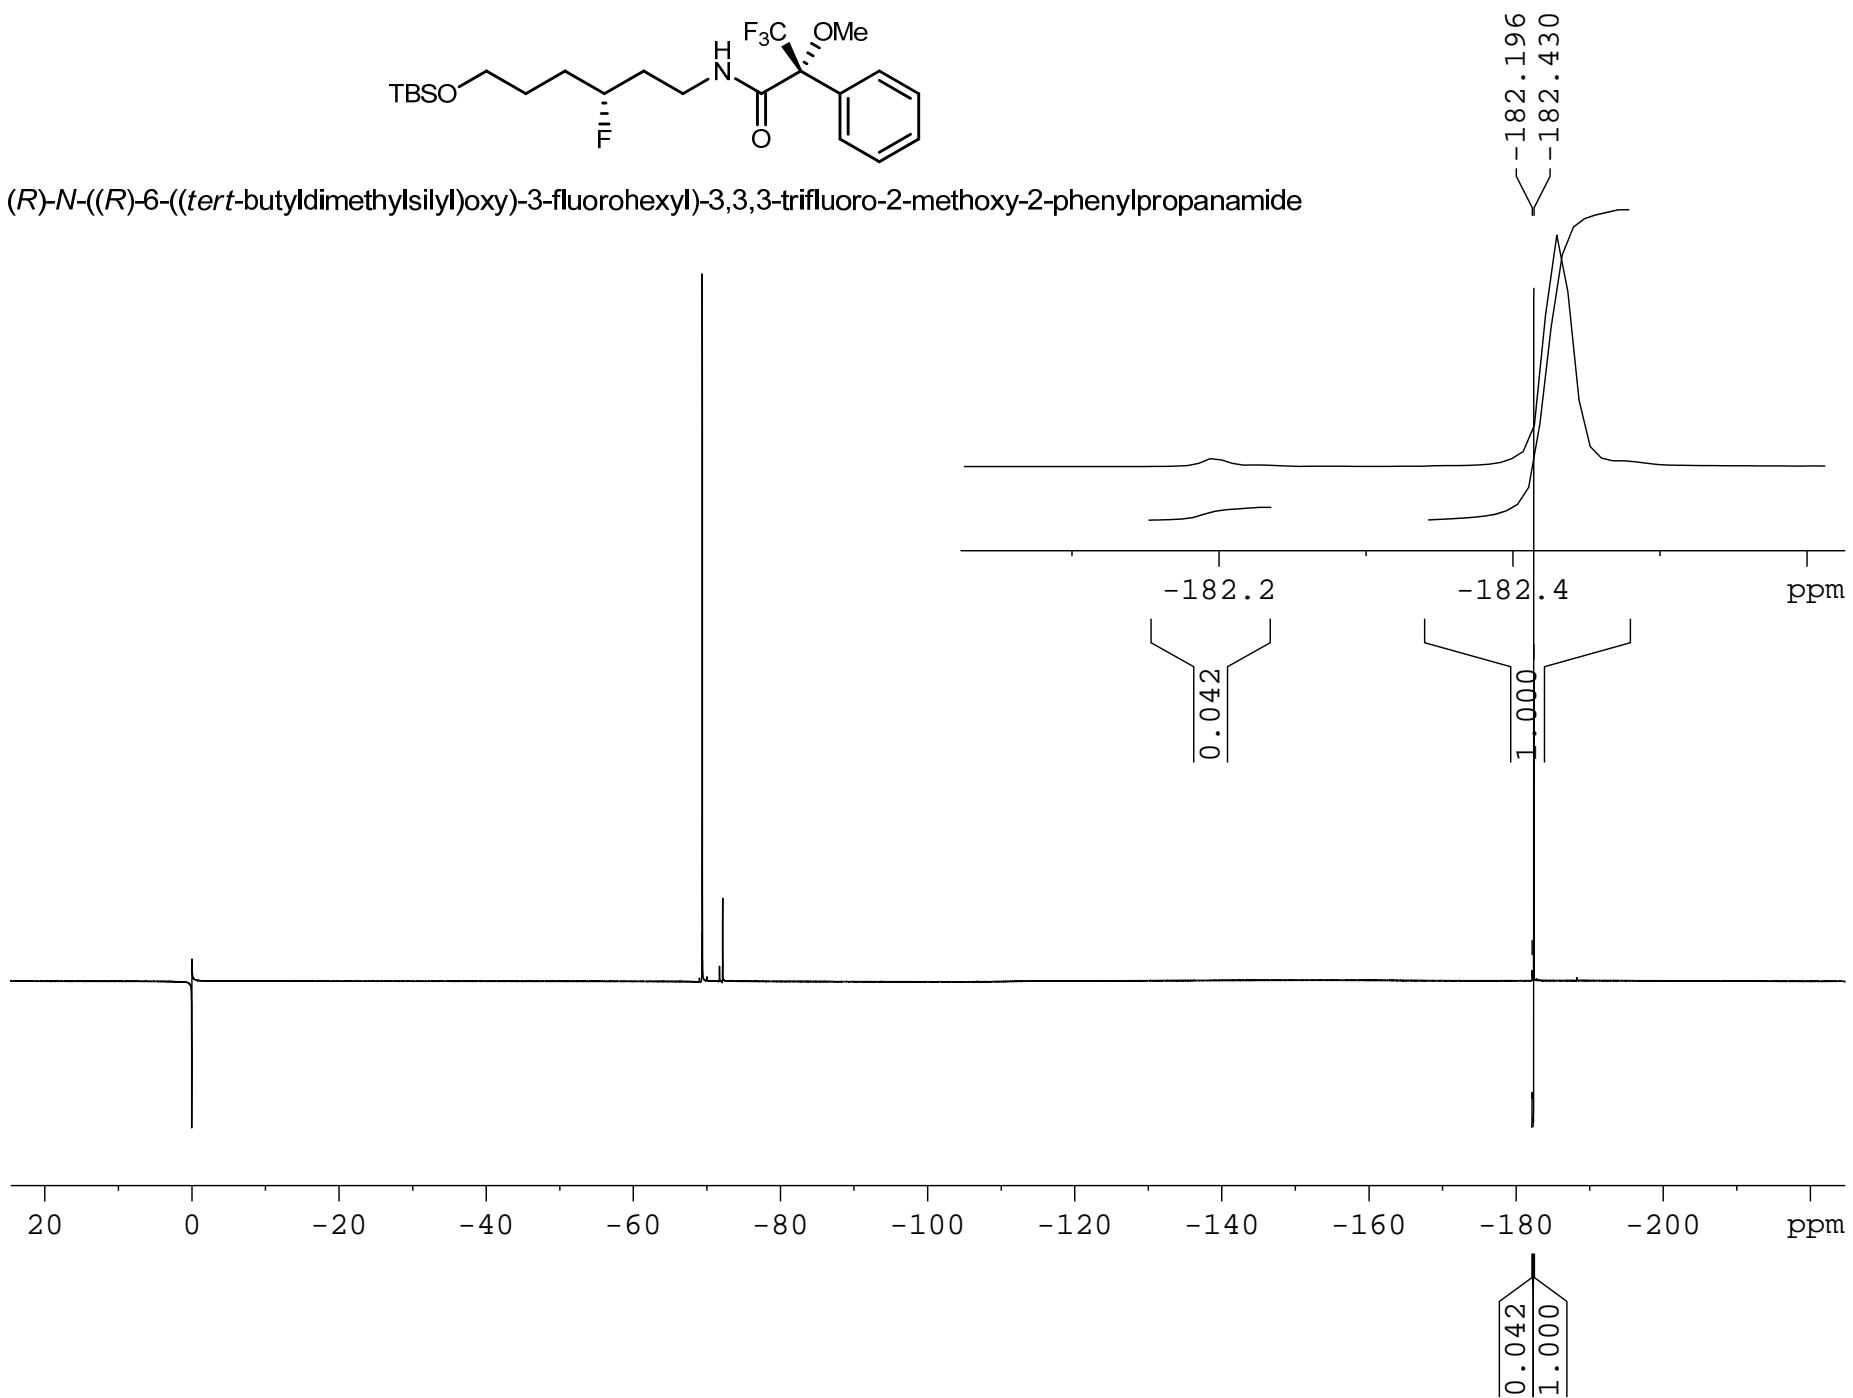

Data File C:\CHEM32\2\DATA\SINGLE 2012-11-13 12-08-33\1ED-0101.D  
 Sample Name: MCO-IV-184

```

=====
Acq. Operator   :                               Seq. Line :    1
Acq. Instrument : 12475 LC on SFC                Location  : P1-E-04
Injection Date  : 11/13/2012 12:09:10 PM        Inj       :    1
                                                Inj Volume: 5.000 µl
Different Inj Volume from Sequence ! Actual Inj Volume : 1.000 µl
Acq. Method    : C:\CHEM32\2\DATA\SINGLE 2012-11-13 12-08-33\CHIRALPAK_IA_5_MEOH.M
Last changed   : 11/13/2012 12:08:57 PM
                (modified after loading)
Analysis Method : C:\CHEM32\2\METHODS\CHIRALPAK_IC_5_MEOH.M
Last changed   : 11/13/2012 11:19:48 AM
                (modified after loading)
Additional Info : Peak(s) manually integrated
  
```

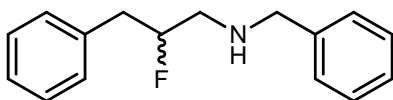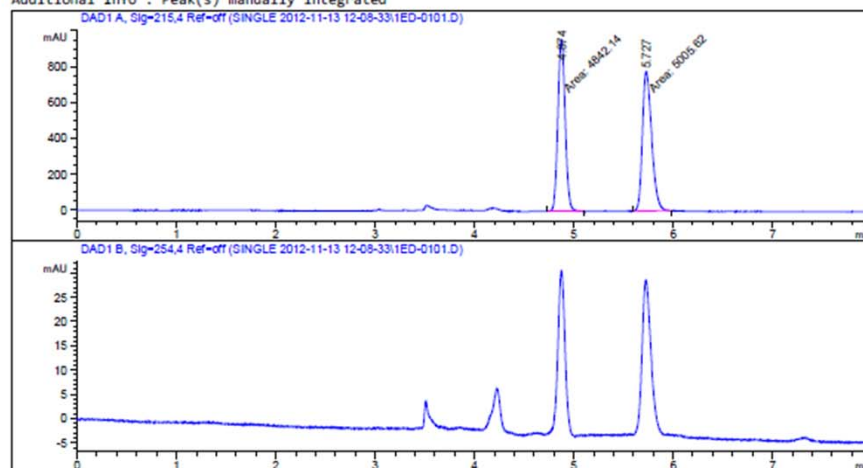

Area Percent Report

```

Sorted By      :      Signal
Multiplier:    :      1.0000
Dilution:      :      1.0000
Use Multiplier & Dilution Factor with ISTDs
  
```

Signal 1: DAD1 A, Sig=215,4 Ref=off

| Peak # | RetTime [min] | Type | Width [min] | Area [mAU*s] | Height [mAU] | Area %  |
|--------|---------------|------|-------------|--------------|--------------|---------|
| 1      | 4.874         | MM   | 0.0841      | 4842.13574   | 959.32269    | 49.1699 |
| 2      | 5.727         | MM   | 0.1071      | 5005.61963   | 778.75336    | 50.8301 |

Totals : 9847.75537 1738.07605

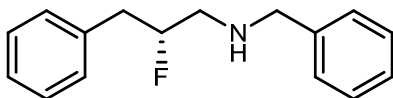

94% ee

Data File C:\CHEM32\2\DATA\SINGLE 2012-11-13 12-28-47\1EE-0401.D  
 Sample Name: MCO-V-20

```

=====
Acq. Operator   :                               Seq. Line :    4
Acq. Instrument : 12475 LC on SFC                 Location  : P1-E-05
Injection Date  : 11/13/2012 12:53:32 PM         Inj       :    1
                                                Inj Volume: 5.000 µl
Different Inj Volume from Sequence !   Actual Inj Volume : 1.000 µl
Acq. Method    : C:\CHEM32\2\DATA\SINGLE 2012-11-13 12-28-47\CHIRALPAK_IA_5_MEOH.M
Last changed   : 11/13/2012 12:35:48 PM
                (modified after loading)
Analysis Method: C:\CHEM32\2\METHODS\CHIRALPAK_IC_5_MEOH.M
Last changed   : 11/13/2012 11:19:48 AM
                (modified after loading)
Additional Info : Peak(s) manually integrated
  
```

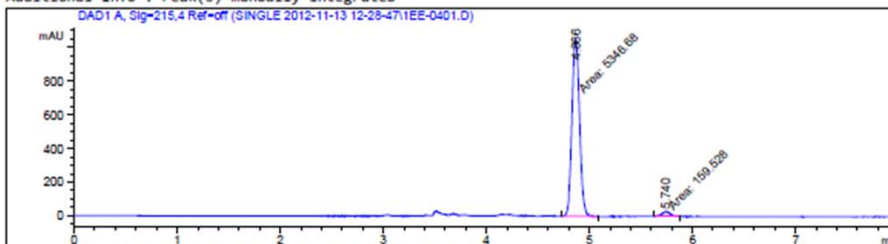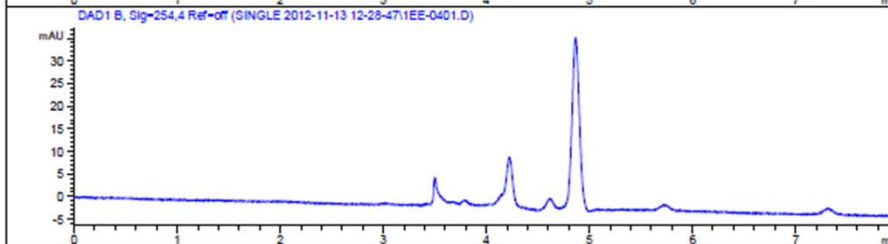

=====  
 Area Percent Report  
 =====

```

Sorted By      :      Signal
Multiplier:    :      1.0000
Dilution:      :      1.0000
Use Multiplier & Dilution Factor with ISTDs
  
```

Signal 1: DAD1 A, Sig=215,4 Ref=off

| Peak # | RetTime [min] | Type | Width [min] | Area [mAU*s] | Height [mAU] | Area %  |
|--------|---------------|------|-------------|--------------|--------------|---------|
| 1      | 4.866         | MM   | 0.0839      | 5346.67529   | 1062.06238   | 97.1028 |
| 2      | 5.740         | MM   | 0.0988      | 159.52835    | 26.91542     | 2.8972  |

Totals :                    5506.20364 1088.97780

Data File C:\CHEM32\2\DATA\SINGLE 2012-11-13 10-55-36\1EC-0101.D  
Sample Name: MCO-IV-185

=====

|                 |   |                        |            |   |          |
|-----------------|---|------------------------|------------|---|----------|
| Acq. Operator   | : |                        | Seq. Line  | : | 1        |
| Acq. Instrument | : | 12475 LC on SFC        | Location   | : | P1-E-03  |
| Injection Date  | : | 11/13/2012 11:01:13 AM | Inj        | : | 1        |
|                 |   |                        | Inj Volume | : | 5.000 µl |

Different Inj Volume from Sequence ! Actual Inj Volume : 2.000 µl

|                 |   |                                                                   |
|-----------------|---|-------------------------------------------------------------------|
| Acq. Method     | : | C:\CHEM32\2\DATA\SINGLE 2012-11-13 10-55-36\CHIRALPAK_IB_3_MEOH.M |
| Last changed    | : | 11/13/2012 11:08:26 AM<br>(modified after loading)                |
| Analysis Method | : | C:\CHEM32\2\METHODS\CHIRALPAK_IC_5_MEOH.M                         |
| Last changed    | : | 11/13/2012 11:19:48 AM<br>(modified after loading)                |

Additional Info : Peak(s) manually integrated

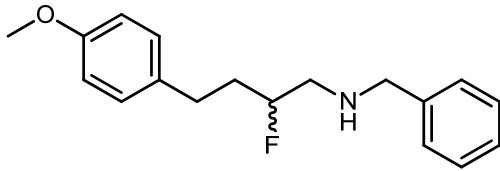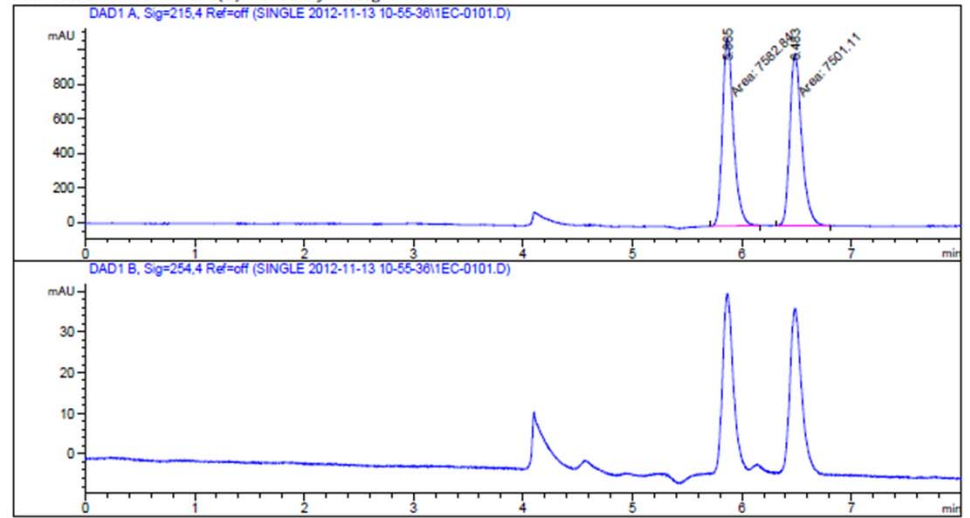

=====  
Area Percent Report  
=====

Sorted By : Signal  
Multiplier: : 1.0000  
Dilution: : 1.0000  
Use Multiplier & Dilution Factor with ISTDs

Signal 1: DAD1 A, Sig=215,4 Ref=off

| Peak # | RetTime [min] | Type | Width [min] | Area [mAU*s] | Height [mAU] | Area %  |
|--------|---------------|------|-------------|--------------|--------------|---------|
| 1      | 5.865         | MM   | 0.1166      | 7582.83887   | 1083.60217   | 50.2709 |
| 2      | 6.483         | MM   | 0.1255      | 7501.11475   | 996.49432    | 49.7291 |

Totals : 1.50840e4 2080.09650

Data File C:\CHEM32\2\DATA\SINGLE 2012-11-15 11-06-30\001-0201.D  
 Sample Name: MCO-V-25

```

=====
Acq. Operator   :                               Seq. Line :    2
Acq. Instrument : 12475 LC on SFC                Location  : Vial 1
Injection Date  : 11/15/2012 11:16:55 AM        Inj       :    1
                                                Inj Volume: 5.000 µl
Different Inj Volume from Sequence !      Actual Inj Volume : 2.500 µl
Acq. Method    : C:\CHEM32\2\DATA\SINGLE 2012-11-15 11-06-30\CHIRALPAK_IB_3_MEOH.M
Last changed   : 11/15/2012 10:55:44 AM
Analysis Method : C:\CHEM32\2\DATA\SINGLE 2012-11-15 11-06-30\001-0201.D\DA.M (CHIRALPAK_IB_
                3_MEOH.M, From Data File)
Last changed   : 11/15/2012 11:26:56 AM
                (modified after loading)
Additional Info : Peak(s) manually integrated
  
```

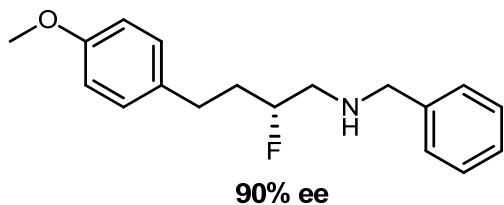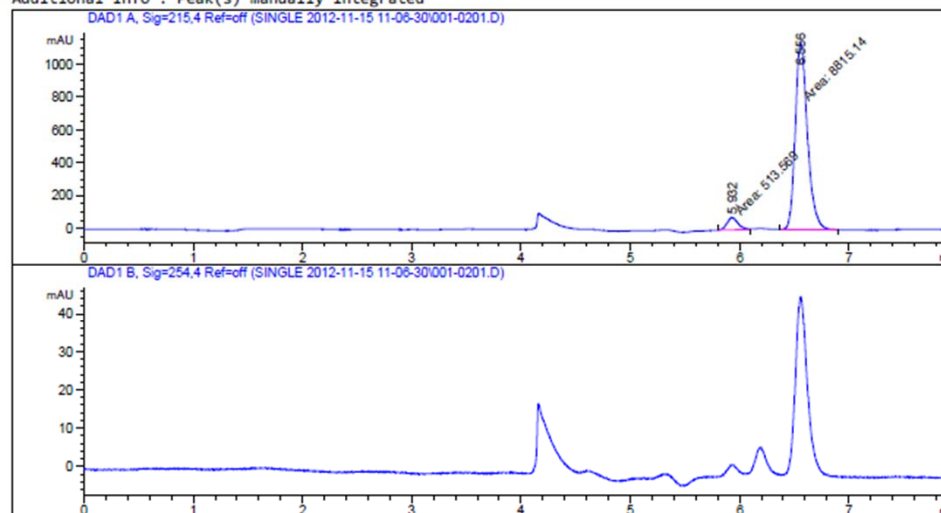

Area Percent Report

```

Sorted By      :      Signal
Multiplier:    :      1.0000
Dilution:      :      1.0000
Use Multiplier & Dilution Factor with ISTDs
  
```

Signal 1: DAD1 A, Sig=215,4 Ref=off

| Peak # | RetTime [min] | Type | Width [min] | Area [mAU*s] | Height [mAU] | Area %  |
|--------|---------------|------|-------------|--------------|--------------|---------|
| 1      | 5.932         | MM   | 0.1156      | 513.56860    | 74.04364     | 5.5052  |
| 2      | 6.556         | MM   | 0.1293      | 8815.13965   | 1136.69775   | 94.4948 |

Totals : 9328.70825 1210.74139

Data File C:\CHEM32\2\DATA\SINGLE 2012-11-15 11-43-23\002-0101.D  
 Sample Name: MCO-V-14

```

=====
Acq. Operator   :                               Seq. Line :    1
Acq. Instrument : 12475 LC on SFC                Location  : Vial 2
Injection Date  : 11/15/2012 11:44:39 AM        Inj       :    1
                                                Inj Volume: 5.000 µl
Different Inj Volume from Sequence !   Actual Inj Volume : 15.000 µl
Acq. Method    : C:\CHEM32\2\DATA\SINGLE 2012-11-15 11-43-23\CHIRALPAK_ID_7_MEOH.M
Last changed   : 11/15/2012 11:36:24 AM
Analysis Method: C:\CHEM32\2\DATA\SINGLE 2012-11-15 11-43-23\002-0101.D\DA.M (CHIRALPAK_ID_
7_MEOH.M, From Data File)
Last changed   : 11/15/2012 2:24:41 PM
                (modified after loading)
Additional Info : Peak(s) manually integrated
  
```

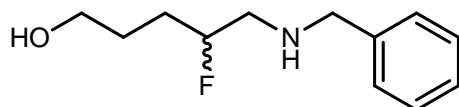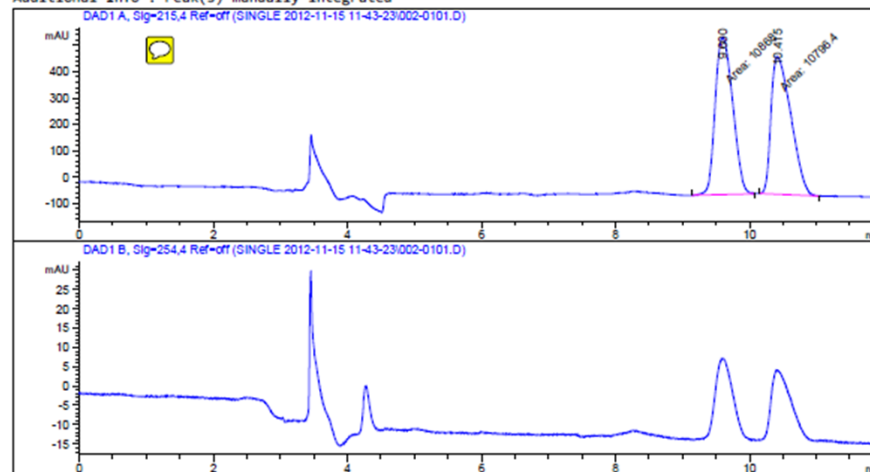

Area Percent Report

```

Sorted By      :      Signal
Multiplier:    :      1.0000
Dilution:      :      1.0000
Use Multiplier & Dilution Factor with ISTDs
  
```

Signal 1: DAD1 A, Sig=215,4 Ref=off

| Peak # | RetTime [min] | Type | Width [min] | Area [mAU*s] | Height [mAU] | Area %  |
|--------|---------------|------|-------------|--------------|--------------|---------|
| 1      | 9.600         | MM   | 0.3032      | 1.08680e4    | 597.32648    | 50.1652 |
| 2      | 10.415        | MM   | 0.3431      | 1.07964e4    | 524.43738    | 49.8348 |

Totals : 2.16643e4 1121.76385



Data File C:\CHEM32\2\DATA\SINGLE 2012-11-15 12-27-32\003-0101.D  
Sample Name: MCO-V-26

=====

|                 |   |                        |            |   |          |
|-----------------|---|------------------------|------------|---|----------|
| Acq. Operator   | : |                        | Seq. Line  | : | 1        |
| Acq. Instrument | : | 12475 LC on SFC        | Location   | : | Vial 3   |
| Injection Date  | : | 11/15/2012 12:28:55 PM | Inj        | : | 1        |
|                 |   |                        | Inj Volume | : | 5.000 µl |

Different Inj Volume from Sequence ! Actual Inj Volume : 10.000 µl

|                 |   |                                                                                                     |
|-----------------|---|-----------------------------------------------------------------------------------------------------|
| Acq. Method     | : | C:\CHEM32\2\DATA\SINGLE 2012-11-15 12-27-32\CHIRALPAK_ID_7_MEOH.M                                   |
| Last changed    | : | 11/15/2012 12:40:48 PM<br>(modified after loading)                                                  |
| Analysis Method | : | C:\CHEM32\2\DATA\SINGLE 2012-11-15 12-27-32\003-0101.D\DA.M (CHIRALPAK_ID_7_MEOH.M, From Data File) |
| Last changed    | : | 11/15/2012 12:41:31 PM<br>(modified after loading)                                                  |

Additional Info : Peak(s) manually integrated

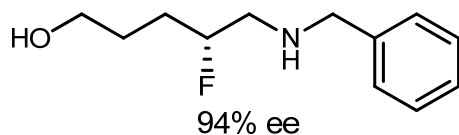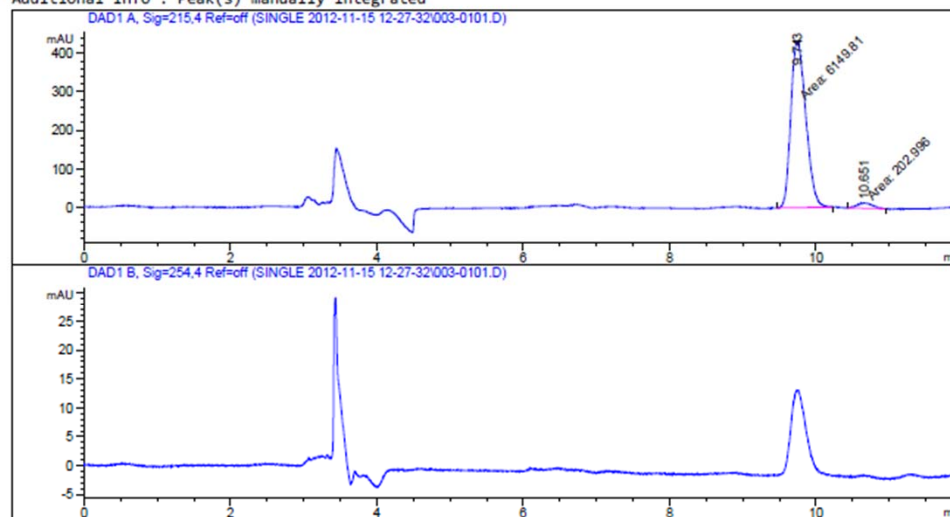

=====  
Area Percent Report  
=====

Sorted By : Signal  
Multiplier: : 1.0000  
Dilution: : 1.0000  
Use Multiplier & Dilution Factor with ISTDs

Signal 1: DAD1 A, Sig=215,4 Ref=off

| Peak # | RetTime [min] | Type | Width [min] | Area [mAU*s] | Height [mAU] | Area %  |
|--------|---------------|------|-------------|--------------|--------------|---------|
| 1      | 9.743         | MM   | 0.2379      | 6149.81494   | 430.90405    | 96.8046 |
| 2      | 10.651        | MM   | 0.2380      | 202.99626    | 14.21245     | 3.1954  |

Totals : 6352.81120 445.11650
